# Supplementary material for: Genome-wide analysis of the cellulose synthase-like (Csl) gene family in bread wheat (Triticum aestivum L.)
Source: PubMed Central journal article supplement (PMC5670714; doi:10.1186/s12870-017-1142-z), 2017-11-03
Supplement: 12870_2017_1142_MOESM1_ESM.pdf [file 12870_2017_1142_MOESM1_ESM.pdf]

**Additional file - Figure S1:** FASTA sequences of CSL proteins used for the phylogenetic analysis

>CSLA\_2BS\_TGACv1\_146583\_AA0468630.1\_Triticum\_aestivum

MEAAEIGGALLFALAAAAALFSAVSTGAVDFSHPLAVGGRVDFQETISWFIGIFDGSSSSSAAGGVSLAEVYELWVRVR  
GRVIAPALQVAVWACMVMSVMLVVEALYNCVSLGKAVGWRPEWRFKWEPLAGDDEEKGGAHYPMVLVQIPM  
YNELEVYKLSIGAACELQWPKDRIIVQVLDDSTDPFIKNLVELECESWAVKGLNIKYATRSSRKGFKAGALKKGMEDYA  
KQCEYVAIFDADFQPEPDFLLRTPFFVHNPEVALVQARWSFVNDTASLLTRVQKMFFDYHFKVEQEAGSATFSFFSFN  
GTAGVWRTSAIKEAGGWKDRTTVEDMDLAVRATLKGWKFVYVGDIVKSELSTYKAYCRQQFRWSCGGAHLFRKV  
AKDILTAKDVSLIKKFHMLYSFFLVRVAVPTVACILYNIILPISVMIPELFLPVWGIAYIPTVLLVVTAIRHPKNLHILPFWIL  
FESVMTMHRMRAALSGLFELSEFNEWVVTKKTGNNFEDSEVPLLQKTRKRLRDRVNFREIVFSAFLFFCASYNLVFTGK  
TSYFNLYLQGLAFVCLGLNFTGTCCSQ

>CSLA\_2AS\_TGACv1\_113418\_AA0355820.2\_Triticum\_aestivum

MEAAEIGGALLFALAAAAALFAAVSTGAIDFSRPLAVGGRVDFQEAISWFIGVFDGSSSSSAAGGVSLAEVYELWVRVR  
GRVIAPALQVAVWACMVMSVMLVVEALYNCVSLGKAVGWRPEWRFKWEPLAGDDEEKGGAHYPMVLVQIPMY  
NELEVYKLSIGAACELQWPKDRIIVQVLDDSTDPFIKNLVELECESWSVKGLNIKYATRSSRKGFKAGALKKGMEDYAK  
QCEYVAIFDADFQPEPDFLLRTPFFVHNPEVALVQARWSFVNDNASLLTRVQKMFFDYHFKVEQEAGSATFSFFSFN  
GTAGVWRAAAIKEAGGWKDRTTVEDMDLAVRATLKGWKFVYVGDIVKSELSTYKAYCRQQFRWSCGGAHLFRKV  
AKDILTAKDVSLIKKFHMLYSFFLVRVAVPTLACILYNIILPISVMIPELFLPIWGIAYIPTVLLVVTAIRHPKNLHILPFWILF  
ESVMTMHRMRAALSGLFELSEFNEWVVTKKTGNNFEDNEVPLLQKTRKRLRDRVNFREIVFSAFLFFCASYNLVFPGKT  
RYFNLYLQGLAFVCLGLNFTGTCCSQ

>CSLA\_2DS\_TGACv1\_177473\_AA0578070.1\_Triticum\_aestivum

MEAAEIGGALLFALAAAAALFAAVSTGAVDFSHPPAVGGRVDFQEAISWFIGVFDGSSSSSAAGGVSLAEVYELWVR  
VRGRVIAPALQVAVWACMVMSVMLVVEALYNCVSLGKAVGWRPEWRFKWEPLAGDDEEKGGAHYPMVLVQIP  
MYNELEVYKLSIGAACELQWPKDRIIVQVLDDSTDPFIKNLVELECESWAVKGLNIKYATRSSRKGFKAGALKKGMEDY  
AKQCEYVAIFDADFQPEPDFLLRTPFFVHNPEVALVQARWSFVNDTASLLTRVQKMFFDYHFKVEQEAGSATFSFFSF  
NGTAGVWRTAAAIKEAGGWKDRTTVEDMDLAVRATLKGWKFVYVGDIVKSELSTYKAYCRQQFRWSCGGAHLFRK  
VAKDILTAKDVSLIKKFHMLYSFFLVRVAVPTVACILYNIILPISVMIPELFLPVWGIAYIPTVLLVVTAIRHPKNLHILPFWI  
LFESVMTMHRMRAALSGLFELSEFNEWVVTKKTGNNFEDNEVPLLQKTRKRLRDRVNFREIVFSAFLFFCASYNLVFPG  
KTSYFNLYLQGLAFVCLGLNFTGTCCSQ

>CSLA\_2AS\_TGACv1\_113300\_AA0354190.1\_Triticum\_aestivumMEAGEIGGALLFVLA AAAAVLAAVSTGAVD  
FSHPPAVGGQLDFQETISWFTGVYNGASYSSGAGAVSLAEVHELWVRVRGRVIAPALQVTVWACMVMSVMLAVEAL  
YNCVSLGKVAIGWRPEWRFKWEPLAGDEEKGSAHYPMVLVQIPMYNELEVYKLSIGAACELKWPKDRMIVQVLDNS  
TDPLIKNLVELECETWVTKGLNIKYAPRSGQKFKAGALKKGMEDYARQCEYVAIFDADFQPEPDFLLRTIPFFVHNPK  
VALVQARWSFVNGTVSLLTRIQKMFFDYHFKVEQEAGSATFAFFSFNGTAGVWRTAAAIKEAGGWKDRTTVEDMDLAI  
RATLKGWKFVYVGDIVKSELSSYKAYCRQQFRWACGGANLFRKVAIDILTSKDVSVVKKFYMLYSFLVRRVAVAVA  
CILSNIIVPLSVMIPELYLPVWGVAYIPAVLLVVTAIRNPKNIHLLPFWILFESVMTIHRTRAALVGLFEFSEFNEWVVTKKT  
GNNFEDNKVPLLQKTRKRLRDRVNFPEILFSAFLFFCASYNLVFPGKTSYFNLYLQGLAFVCLGLNFSGTCTCFQ

>CSLA\_2DS\_TGACv1\_177798\_AA0584795.1\_Triticum\_aestivumMAAWNPEHSGAIIVGADDCETTVEDEM  
AAGR DANTKLFHRVANGRKLKNFIP AISVEGITITDQAAKEEAF FEAYS ELLGR CGSREHTLDLDYLGIESINLEDQDLVFQ  
EEEVWVVRDMPSDRALGPNGFIGVFFQAWAIVKRDVMAALNKLFLNNGRGRGLNQLITLIPKNHEACQIKDFRP

ICLVHSIPKLASKLLATRLCPRMGELVHAKQSAFIKGRNIHDNFLQVRQLARKLYKRKTKSVMLKLDISRAFDSLWPFLE  
VLRVKGFSRTWRFWIATLLTASSRVVNGCVGKKFMHACGLRQGDSISPLLFVIAMDVLSAMILKARETNAVSKIPGC  
APIQRSLYVDDVVMFIKPSWTDLWVQALRVFGEASGLKVNFSKSSAVMIRSEEEEEVLRKAMPWKMETFPIKYL  
LQLGIKQLTRSEWQPVDQALKMMPGWQRGPVTRPGRLPLVNQVVRARPIHHLIVAEAPKRALDRVDKGCRAFFWA  
GSEEQGGQCAVAWRGVYRQKMGGLGVVDLHKHGIALRSLSQTSFSEQSRSSCTIQKLLLFKLSGSPNLNGTVSLLTR  
IQKMFFDYHFKEVEEAGSATFAFFSFNGTAGVWRTAAIKEAGGWKDRTTVEDMDLAIRATLKGWKFYVVDIRVKSEL  
PSSYKAYCRQQFRWACGGANLFRKVAVDILTSKDVSVIKKFYMLYSFLVRRRVVAPAVACILSNIIVPLSVMIPELYLPVW  
GVAYIPTVLLVVTAIRNPKNIHLLPFWILFESVMTIHRTRAALVGLFELTEFDEWLVTKKTGNNFEDNKVPLLQKTRKRLR  
DRVNFPEILFSAFLFFCASYNLVFPGKTSYYFNLYFQGLAFAFLGLNFTGTCTCFQ

>CSLA\_6BS\_TGACv1\_513375\_AA1639370.1\_Triticum\_aestivumMDAAVGLPDAWSQVRAPVIVPLLKLAVAVC  
LLMSVLLFLERLYMAVVIVGVKLLGRRPERRYKCDPICEDDDPELGSAAFPVVLVQIPMFNEREVYQLSIGAVCGLSWPSD  
RLVVQVLDDSTDPLIKEMVRMECERWAHKGINITYQIREDRKGYKAGALKAGMKHGYVRECEYMVIFDADFQDPDF  
LHRTIPYLHHNPEIALVQARWRFVNADECLMTRMQEMSLDYHFKEVEVSSSVCAFFGFNGTAGVWRIAAVNEAGG  
WKDRTTVEDMDLAIRASLKGWKFVYLGDVQVKSELPSTFKAFRFQQRWVSCGPANLFRKMLLEIVTNKKVTIWKKFH  
VIYNFFLVRKIVAHIVTFTFYCIIPTTIFVPEVHIPKWGCYIPTIITLLNSVGTPRSFLHLLFFWILFENVMSLHRTKATLIGLE  
AGRANEWVVTEKLSAMKMKASARKSFMRMWERLNVPELGVGAFLFSCGWYDVAFGKDNFFIYFFQSMAF  
FVVGVGYYGTIVPPS

>CSLA\_6AS\_TGACv1\_485966\_AA1554960.1\_Triticum\_aestivumMDAAVGLPDAWSQVRAPVIVPLLKLAVALC  
LLMSVLLFLERLYMAVVIVGVKLLGRRPERRYKCDPICEDDDPELGSAAFPVVLVQIPMFNEREVYQLSIGAVCGLSWPS  
DRLVVQVLDDSTDPLVKEMVRMECERWAHKGINITYQIREDRKGYKAGALKAGMKHGYVRECEYMVIFDADFQDPD  
DFLHRTIPYLHHNPEIALVQARWRFVNADECLMTRMQEMSLDYHFKEVEVSSSVCAFFGFNGTAGVWRIAAVNEA  
GGWKDRTTVEDMDLAIRASLKGWKFVYLGDVQVKSELPSTFKAFRFQQRWVSCGPANLFRKMLVEIVTNKKVTIWKK  
FHVIYNFFLVRKIVAHIVTFTFYCIIPTTIFVPEVHIPKWGCYIPTIITLLNSVGTPRSFLHLLFFWILFENVMSLHRTKATLIGL  
LEAGRANEWVVTEKLSAMKMKASARKSFMRMWERLNVPELGVGAFLFSCGWYDVAFGKDNFFIYFFQSM  
AFFVVGVGYYGTIVPQS

>CSLA\_U\_TGACv1\_642146\_AA2112270.1\_Triticum\_aestivumMAAALLPGTRITFSGAWQQVRGPVIVPLLRS  
VLLCVAMSAMLLAEKVYMAVVVLALRLLGRRPELQYRWEPMRDGDDPELGSAAYPMLVLVQIPMYNEREVYQLSIGA  
ACGLSWPSDRIVQVLDDSTDPVKELVQVEQQRWARKGVNIKYETRNNRRGYKAGALKEAMKHGYVKDCDLVAIFD  
ADFQPEPDFLSRSPFLVHNPDIALVQARWKFVNADECLMTRMQEMSLDYHFKEVEVGSSTYAFFGFNGTAGVWRI  
SALNEAGGWKDRTTVEDMDLAVRASLKGWKFVYLGDLKVKNELPSTFKAFRYQQRWVSCGPANLFRKMVMEIKNK  
KVTLWKKIHVVYNFFFLRKVVAHIMTFVYCLVIPATVLVPEVEVPKWGCYIPAITLLSVVGTPRSFLHLLVIFWALFENV  
MSLHRTKATFIGLLEAHTVNEWVVTEKLGDTVTKMPSKALKKLRIGIGERLHLWELGVAAYLFICGCYSISFGNNHYFIF  
LLMQSIAFFIVGVGYVGTFTVQ

>CSLA\_7BL\_TGACv1\_579090\_AA1903960.1\_Triticum\_aestivumMSTLPRVWQIAAAWEQVRGPVIVPLLRSV  
LLCLAMSAMLFAEKVYMAVVVLAVRLLGRRPEQQYRWEVPGDNDPELGSAAYPMLVLVQIPMYNEREVYQLSIGAA  
CGLSWPSDRIVQVLDDSTDPVIKELVQVEQRRWARKGVNIKYEIRDNRRGYKAGALKEGMKHGYVKDCDLVAIFDADF  
QPEPDFLSRSPFLVHNPDIALVQARWKFVNADECLMTRMQEMSLDYHFKEVEVGSSTYAFFGFNGTAGVWRISAL  
NEAGGWKDRTTVEDMDLAVRASLKGWKFVYIGDLKVKNELPSTFKAFRYQQRWVSCGPANLFRKMVMEIVRNKKVT  
LWKKIHVIYNFFLVRKVAHIVTFVYCVVERIDMVD

>CSLA\_7AL\_TGACv1\_558725\_AA1795700.1\_Triticum\_aestivumMSTLPGVWQIAAAWEQVRGPVIVPLLRASV  
LLCLAMSAMLFAEKVYMAVVVLAVRLLGRRPERQWKWEPVGEDDPELGSAAYPMLVQIPMYNEREVYQLSIGAAC  
GLSWPSDRIVVQVLDSDTPVIKELVQVECRRWARKGVNIKYEIRDNRGKYGALKEGMKHGYVKDCDLVAIFDADF  
QPEPDFLWRAVPFLVHNPDIQVQARWKFVNADECLMTRMQEMSLDYHFRVEQEVGSSTYAFFGFNGTAGVWRISA  
LNEAGGWKDRTTVEDMDLAVRASLKGWKFVYLGDLKVKNELPSTFKAFRYQQHRWSCGPANLFRKMVMEIIRNKKV  
TLWKKIHVVYSFFLVRKVVAVHIVTFVYCLVIPATVLVPEVEVPKWGCYIPTIITLLNAVGTPRS VHLLVFWVLFENVMS  
LHRAKATFIGLLEAGTVNEWVTEKLGDTLKAKMPKALKKLRMRIGERLHLWELGVAAYFLFCGCYDISFGNNRYFIFL  
FMQSI AFFIVGVGYVGT FVAQ

>CSLA\_6DS\_TGACv1\_543811\_AA1744360.1\_Triticum\_aestivumMAPLGADAAAAA WAAVRARAVAPALTA  
VWACLAMSAMLLLEAACMSLVSLVAVRLLRLRPERRFKWEPMAGALEGGEADVEDPPASAGRREFPMLVQIPMYN  
EKEVYKLSIGAVCALTWPPDRIIIQVLDSDTPPIKELVELECEQEWASKKIDIKYEVRNNRKGKYGALKKGMEHVYAQQC  
EFVAIFDADFQPESDFLKTIPLVHNPKIALVQTRWKFVNYDACLMTRIQKMSLDYHFKVEQESGSMHAFFGFNGTA  
GVWRVSAINESGGWKDRTTVEDMDLAVRACLKEWEFLYVGDIVKSELSTFKAYRHQQHRWTCGAANLFRKMGW  
EIVTNKGVSIWKKWHLLYSFLFVRRVIAPILTFLYCVVIPLSAMVPEVHIPVWGLVYIPTAITVMNAIRNPGSLHLM  
PFWILFENVMSMHRMRAALTGLLETAHVNDWVVT EKVGDLVKDDFDVPLLEPLKPTCEVERIYIPELLLALYL  
LICASYDYVLGSQTYFMYIYLQALAFIVLGFVGMKTPCS

>CSLA\_6AS\_TGACv1\_487286\_AA1569690.1\_Triticum\_aestivumMAPLSAGAAAAA WAAVRARAVAPALTA  
AVWACLAMSAMLLLEAACMSLVSLVAVRLLRLRPERRFKWEPMTGALEGGEADVEDPAGRREFPMLVQIPMYNEKEV  
YKLSIGAVCALTWPPDRIIIQVLDSDTPPIKELVELECEQEWASKKIDIKYEVRNNRKGKYGALKKGMEHVYAQQCE  
FVAIFDADFQPESDFLKTIPLVHNPKIALVQTRWKFVNYDACLMTRIQKMSLDYHFKVEQESGSMHAFFGFNGT  
AGVWRVSAINESGGWKDRTTVEDMDLAVRACLKEWEFLYVGDIVKSELSTFKAYRHQQHRWTCGAANLFRKMGW  
EIVTNKGVSIWKKWHLLYSFLFVRRVIAPILTFLYCVVIPLSAMVPEVHIPVWGLVYIPTAITIMNAIRNPGSLH  
LMPFWILFENVMSMHRMRAALTGLLETAHVNDWVVT EKVGDLVKDDFDVPLLEPLKPTCEVERIYIPELLLAL  
YL LICASYDYVLGSQTYFMYIYLQALAFIVLGFVGMKTPCS

>CSLA\_6BS\_TGACv1\_513376\_AA1639390.2\_Triticum\_aestivumMAPLGADAAAAA WAAVRARAVSPALTA  
AVWACLAMSAMLLLEAACMSLVSLVAVRLLRLRPQRRFKWEPMPGALPGAEDAEDPPGRREFPMLVQIPMYNEKEV  
YKLSIGAVCALTWPPDRIIIQVLDSDTPPIKELVELECEQEWASKKIDIKYEVRNNRKGKYGALKKGMEHVYAQQCE  
FVAIFDADFQPESDFLKTIPLVHNPKIALVQTRWKFVNYDACLMTRIQKMSLDYHFKVEQESGSMHAFFGFNGT  
AGVWRVSAINESGGWKDRTTVEDMDLAVRACLKEWEFLYVGDIVKSELSTFKAYRHQQHRWTCGAANLFRKMGW  
EIVTNKGVSIWKKWHLLYSFLFVRRVIAPILTFLYCVVIPLSAMVPEVHIPVWGLVYIPTAITIMNAIRNPGSLH  
LMPFWILFENVMSMHRMRAALTGLLETAHVNDWVVT EKVGDLVKDDFDVPLLEPLKPTCEVERIYIPELLLAL  
YL LICASYDYVLGSQTYFMYIYLQALAFIVLGFVGT KTPCS

>CSLA\_U\_TGACv1\_642146\_AA2112290.1\_Triticum\_aestivumMSTLPGAWHVA AAWEQVRGPVIVPLLRASV  
LCLAMSAMLFAEKVYMAVVVLAVRLLGRRPERQYQWEPMGDDPELGSAAYPMLVQIPMYNEREVYQLSIGAACG  
LSWPSDRIVVQVLDSDTPVIKELVRVECRRWARKGVNIKYEIRDNRGKYGALKEGMKHGYVKDCDLVAIFDADFL  
WRAVPFLVHNPDIQVQARWKFVNADECLMTRMQEMSLDYHFKVEQEVGSSTYAFFGFNGTAGVWRISALNEAGG  
WKDRTTVEDMDLAVRASLKGWKFVYLGDLKVKNELPSTFKAFRYQQHRWSCGPANLFRKMVMEIIRNKKVTLWKKI  
HVVYSFFLVRKVVAVHIVTFVYCLVIPATVLVPEVEVPKWGCYIPTIITLLNAVGTPRS VHLLVFWVLFENVMSL  
HRAKA

TFIGLLEVGTVNEWVVTEKLGDTLKAKMPSKALRKLRMRIGERLHLWELGVAAYLFLCGCYDISFGNNRYFIFLFMQSIA  
FFIVGVGYVGTFFVAQ

>CSLA\_7BS\_TGACv1\_592860\_AA1945380.1\_Triticum\_aestivumMAGDGEGAAAFVAKAEWLAGSGGLPLLR  
WWRASGGGELLRGWDAVRAGAVAPALAAVSGACLAMSAMLLAEAVFMAAASLVRRRPERRYSAGPLGAQDGEDE  
DEERGLLGYPMLVQIPMYNEREVYKLSIGAACGLSWPSDRVIVQVLDDSTDPTIKDLVELECKIWAKKGKNVKYEVNR  
NREGYKAGALKEGMLHAYVQQCDLAVFDADFQPEPDLFMRITIPYLSRNPQIALVQARWEFVNPNECLMTRIQQMTL  
DYHFKEVEQAGSSTFAFFGFNGTAGVWRISAIKEAGGWDDRTTVEDMDLAVRAGLKGWKFVYVGDVVKSELPSNLK  
AYRRQQRWTCGAANLFRKMGAEILLTKEVSLWWKLYLLYSFFLVRKVVAVHVPFVLYCVVIPFSVLIPEIKIPAWGVVYI  
PTAITILYAVRNPSSIHIFIPFWILFENVMSFHRTKATFIGLLELGSVNEWVVTEKLGVSNTKPVQPILERPRCRFWDRWT  
VSELLFAVFLFVCATYNLVYGSDFYFIYIYLQAITFIIVGTGFCGTSNS

>CSLA\_7DS\_TGACv1\_623146\_AA2050070.1\_Triticum\_aestivumMAGDGEGAAAFAAAKAEWLDGSGGLPLLR  
WWRASGGGELLGRWDAVRAGAVAPALAAVSGACLAMSAMLLAEAVFMAAASLVRRRPERRYSAGPLGAQDGEDE  
ERGLLGYPMLVQIPMYNEREVYKLSIGAACGLSWPSDRVIVQVLDDSTDPTIKDLVELECKIWAKKGKNVKYEVNRNR  
EGYKAGALKEGMLHAYVQQCDLAVFDADFQPEPDLFMRITIPYLARNPQIALVQARWEFVNPNECLMTRIQQMTLDY  
HFKEVEQAGSSTFAFFGFNGTAGVWRISAIKEAGGWDDRTTVEDMDLAVRAGLKGWKFVYVGDVVKSELPSNLKAY  
RRQQRWTCGAANLFRKMGAEILLTKEVSLWWKLYLLYSFFLVRKVVAVHVPFVLYCVVIPFSVLIPEIKIPAWGVVYIPT  
AITVLYAVRNPSSIHIFIPFWILFENVMSFHRTKATFIGLLELGSVNEWVVTEKLGVSNTKPVQPILERPRCRFWDRWTVS  
ELLFAVFLFVCATYNLVYGSDFYFIYIYLQAITFIIVGTGFCGTSNS

>CSLA\_7AS\_TGACv1\_569190\_AA1809650.1\_Triticum\_aestivumMAGDGEGAGDGEGAAAFAAAKAEWLGGG  
GGLPLLRWWRASGGGELLRGWDAVRAGAVAPALAAVSGACLAMSAMLLAEAVFMAAASLVRRRPERRYSAGPLGA  
QDGEDEERGLLGYPMLVQIPMYNEREVYKLSIGAACGLSWPSDRVIVQVLDDSTDPTIKDLVELECKIWAKKGKNVKY  
EVNRNREGYKAGALKEGMLHAYVQQCDLAVFDADFQPEPDLFMRITIPYLARNPQIALVQARWEFVNPNECLMTRIQQ  
KMTLDYHFKEVEQAGSSTFAFFGFNGTAGVWRISAIKEAGGWDDRTTVEDMDLAVRAGLKGWKFVYVGDVVKSEL  
PSNLKAYRRQQRWTCGAANLFRKMGAEILLTKEVSLWWKLYLLYSFFLVRKVVAVHVPFVLYCVVIPFSVLIPEIKIPAW  
GVVYIPTAITILYAVRNPSSIHIFIPFWILFENVMSFHRTKATFIGLLELGSVNEWVVTEKLGVSNTKPVQPILERPRCRFW  
DRWTVSELLFAVFLFVCATYNLVYGSDFYFIYIYLQAITFIIVGTGFCGTSNS

>CSLA\_7DL\_TGACv1\_602617\_AA1962870.1\_Triticum\_aestivumMEAAEQIAVVWKQVRGPVIVPLLRASVMV  
CLAMCVILFVEKVYMAVVIVAMRLIGRRPERQWRWEPLRDDDPELGNAAYPMVLVQIPMYNEREVYKKSIGAACGLS  
WPSDRIVIQVLDDSTDPAIKELVQVECQRWANKGVNIKYEIRDNRGKAGALKEGMKHGYVKDCDFVVFADADFQPE  
PDYLSRAMPFLIHNPEIALIQARWVFNANECLMTRMQEMSLDYHFKEVEQEVGSSAYAFFGFNGTAGVWRISALNEA  
GGWKDRTTVEDMDLAVRASLKGWKFVYLGDLRVKSELPSTFKAFRYQQHRWSCGPANLFRKMLMEIVKNQKVTLW  
KKIYVIYNFFFVRKIIGHILTSVFYCLVIPATVFVPEIEIPRWGYFYIPTIITLLNAVGTPRSFLVIFWVLFENVMSLHRTKATF  
SGLLELGRVNEWVVTEKLGDLVKMKVQSKVTKKLRMRIRERYIIIIIGLLMCISQLSYLNFNMESGCSFWSLVLQPISSFVE  
VTTFLAKDITISFSSCNPSLSLSSVWDLGLHLSPTDNALRSWCNVVRKDSV

>CSLA\_7AL\_TGACv1\_557254\_AA1778850.1\_Triticum\_aestivumMEAAEQIAVVWKQVRGPVIAPLLRASVMV  
CLAMCVILFVEKVYMAVVIVAMRLIGRHPERQWRWEPLRDDDPELGNAAYPMVLVQIPMYNEREVYKKSIGAACGLS  
WPSDRIVIQVLDDSTDPAIKELVQAECHRWANKGVNIKYEIRDNRGKAGALKEGMKHGYVKDCDYVVFADADFQPE  
PDYLSRAMPFLVHNPEIALVQARWVFNANECLMTRMQEMSLDYHFKEVEQEVGSSAYAFFGFNGTAGVWRISALNE

AGGWKDRTTVEDMDLAVRASLKGWKFVCLGDLRVKSELPSTFKAFRYQQHRWSCGPANLFRKMLMEIVKNQKVTL  
WKKIYVIYNFFLVRKIIGHILTSVFYCLVIPATVVFVPEVEIPRWGYFYIPTVITLLNAVGTPRSFLVIFWVLFENVMSLHRTK  
ATFSGLLELGRVNEWVVTEKLGDKMKVQSKVTKKLRMRIRERLQLELGVAAAYIFFCGSYDLLFGKRYYYVFLFMQSI  
FFVGVGVFVGTLPVN

>CSLA\_7BL\_TGACv1\_578444\_AA1895100.1\_Triticum\_aestivumMEAAEQIAVVWKQVRGPVIVPLLRASVMVC  
LAMCVILFVEKVYMAVVIVAMRLIGRRPERQWRWEPLRDDDPELGNAAYPMVLVQIPMYNEREVYKKSIGAVCGLS  
WPSDRIVIQLDDSTEPAIKELVQVECQRWANKGVNIKEYEIRDNRGKYKAGALKEGMKHGYVKDCDFVVFADDFQPE  
PDYLSRAMPFLIHNPEIALVQARWVFNANECLMTRMQEMSLDYHFKVEQEVGSSAYAFFGNGTAGVWRISALNEA  
GGWKDRTTVEDMDLAVRASLKGWKFVYLGDLRVKSELPSTFKAFRYQQHRWSCGPANLFRKMLMEIVKNQKVTLW  
KKIYVIYNFFFVRKIIGHILTSVFYCLVIPATVVFVPEVEIPRWGYFYIPTVITLLNAVGTPRSFLVIFWVLFENVMSLHRTKAT  
FSGLLELGRVNEWVVTEKLDVLMKVQSKVTKKLRMRIRERLQLELGVAAAYIFFCGSYDLLFGKRYYYIFLFMQSI  
VVGGVGVFVGTLPVN

>CSLA\_3DL\_TGACv1\_249033\_AA0835410.1\_Triticum\_aestivumMAGAGEEFMAGVWAEVPRVDWAAVAA  
QCAWAGAQAARAFVVPAILLLVLSLAMTVMILLEKIFVAAVCFAAKAFGHRPERRYQWRPIAAGAAAAARGDEEAGL  
VGGGGSSAAFVVLVQIPMYNEREVYKLSIGAACALEWPSDRVVIQVLDSTDPVAVKDLVEIECQRWKGKGVNIKEYE  
RGNRKYKAGALKEGLKHDYVQECEFIAMFDADFQPESDFLLRTPFLVHNPDIQVTRWKFVNSDECLLTRFQEMS  
LDYHFKFEQEAGSIVYSFFGNGTAGVWRISAIDDAGGWKDRTTVEDMDLAVRTALKGWKFVYVAVKVRSELPSTFK  
AYRFQQRWSCGPANLFFKMLVEILESCKVFSWSKLHLLYDFFVVGKIAAHTVTFIYYCFAIPLSVFFPEIQIPLWGVVYV  
TVITLCKALGSPSSFHLVILWVLFENVMSLHRIRAAITGLLDAGRNEWVVTEKLDANKTKPATEVLDVAVKVIDVELTTP  
LVPKLLKRRIRLWDKYNCEIFVGTICVIGFYDLFYANKGYIYLFIQGLAFLVVGFEYIGTRPPTPSA

>CSLA\_3B\_TGACv1\_221079\_AA0729630.1\_Triticum\_aestivumMAGAGEEFMAAVWAGLPVRVDWAAVAAQ  
CAWAGMQARAFLVVPAILLLVLSLAMTVMILLEKVFVAAVCFAAKAFGHRPERRYQWRPIAAGAAAAARGDEEAGV  
GGGSSAAFVVLVQIPMYNEREVYKLSIGAACALEWPAERVVIQVLDSTDPVVKDLVEIECQRWKGKGVNIKEYEVRG  
NRKGYKAGALKEGLKHDYVQECEFIAMFDADFQPESDFLLRTPFLVHNPDIQVTRWKFVNSDECLLTRFQEMSLDY  
HFKFEQEAGSIVYSFFGNGTAGVWRISAAIDDAGGWKDRTTVEDMDLAVRTALKGWKFVYVAVKVRSELPSTFKAY  
RFQQRWSCGPANLFFKMLVEILESCKVFSWSKLHLLYDFFVVGKIAAHTVTFIYYCFAIPLSVFFPEIQIPLWGVVYVPTV  
ITLCKALGSPSSFHLVILWVLFENVMSLHRIRAAVTGLLDAGRNEWVVTEKLDANKTKPAMEVLDVAVKVIDVELTTP  
VPKLLKRRIRLWDKYNCEIFVGTICIIISGFYDLFYANKGYIYLFIQGLAFLVVGFEYIGTRPPTPSAG

>CSLA\_3AL\_TGACv1\_197519\_AA0666560.1\_Triticum\_aestivumMAGAGEEFMASAAGVWAEVPRVDWA  
AAQCAWAGAQAARAFVVPAILLLLVLSTMTVMILLEKIFVAAVCFAAKAFGHKPERRYQWRPIAASACKTGGVDEEAS  
VGGGSSAAFVVLVQIPMYNEREVYKLSIGAACALEWPSDRVVIQVLDSTDPVAVKDLVEIECQRWKGKGVNIKEYEVRG  
NRKGYKAGALKEGLKHDYVQECEFIAMFDADFQPESDFLLRTPFLVHNPDIQVTRWKFVNSDECLLTRFQEMSLDY  
HFKFEQEAGSIVYSFFGNGTAGVWRISAAIDDAGGWKDRTTVEDMDLAVRTALKGWKFVYVAVKVRSELPSTFKAYR  
FQQRWSCGPANLFFKMLVEILENKKVFSWSKLHLLYDFFVVGKIAAHTVTFIYYCFAIPLSVFFPEIQIPLWGVVYVPTVI  
TLCKALGSPSSFHLVILWVLFENVMSLHRIRAAVTGLLDAGRNEWVVTEKLDANKTKPAMEALDAVKVIDVELATPL  
VPKLLKRRIRLWDKYNCEIFVGTIIICGFYDLFYANKGYIYLFIQGLAFLVVGFEYIGTRPPTPSAE

>CSLA\_3B\_TGACv1\_220828\_AA0720500.1\_Triticum\_aestivumMAMAATAGLWAEVPRVLDWATVAAQCSLA  
GEQARAFLVVPAILLLVLSLAMTVMILLEKLFVAAVCYSAKAFRHRPESRYRWRPITASACKTGGDDEEDGIVVVGSGS

GRAAFPVVLVQIPMYNEREVYKVSIGAACALEWPSDRMVIQVLDSTDPVVKELVKTECQRWKGKGVNIRYEVGRNR  
KGYKAGALKQGLMRDYVRECEFIAMFDADFQPESEDFLLRTPFLVHNPDIALVQTRWKFVNSDKCLLTRFQEMSLDYH  
FKFEQEAGSIVYSFFGFNGTAGVWRISAINDAGGWEDRTTVEDMDLAVRTSLLGWKFVYVGAVKVKSELPSTFKAYRF  
QQHRWSCGPANLFFKILLDILKNKKVSFWSKLHLLYDFFVVGKIAAHTVTFIYYCFAIPVSVFFPEIQIPLWGVVYVPTVITL  
CKALGSPSSFHLVILWVLFNDVMSLHRIKATITGLLDRRVNEWVVTEKLGDKANTEPAMERLDDVQVIDVELSTPLVPK  
LEKRRTRLWHKYNCSEIFVGTFIICGCYDVLYAKKGGYIYLFIQGLAFLVIGFEYIGTRPPSTE

>CSLA\_3DS\_TGACv1\_273022\_AA0927600.1\_Triticum\_aestivumMAATVGLREEVPVRLDWATVAAQCAWAG  
EQTRSFLVPAVRLLVLLSLAMTVMILLEKLFVAAVCYAAKAFGHRPESRYKWGPIAASACKTGGDDEEDGIVVVGSGS  
GSGAFPVVLVQIPMYNEREVYKVSIGAACALEWPSDRMVIQVLDSTDPVVKELVKTECQRWKGKGVNIRYEVGRNR  
KGYKAGALKQGLMRDYVRECKFIAMFDADFQPESEDFLLRTPFLVHNPDIALVQTRWKFVNSDKCLLTRFQEMSLDYH  
FKFEQEAGSIVYSFFGFNGTAGVWRISAINDAGGWEDRTTVEDMDLAVRTALLGWKFVYVGAVKVGSELPSTFKAYRF  
QQHRWSCGPANLFFKMMLLDILRKKKVSFWSKLHLLYDFFVVGKIAAHMVTFIYYCFAIPVSVFFPEIQIPLWGVVYVPTVI  
TLCKALGSPSSFHLVILWVLFNDVMSLHRIKATITGLLDRRVNEWVVTEKLGDKANTEPAMEGLDDVQVIDVELSTPLV  
PKLEKRRTRLWDKYNCSEIFVGTCTIICGCYDVLYAKKGGYIYLFIQGLAFLVIGFEYIGTRPPSIE

>CSLA\_2AL\_TGACv1\_093375\_AA0278800.1\_Triticum\_aestivumMKGVSMLTMARAAWAAVRHAVVPLLQL  
AVYLCAAMSLMLFAERLYMGLVVAALWLRRRRRQRNPGRNKGDDDDVGDLESGAAEDLPVVLVQIPMFNEKQVY  
RLSIGAACGLWWPADKLVQVLDSTDAGIRAMVEAECRRWAGKGVHIRYENRSNRSGYKAGAMREGLKKGAKDC  
ELVAVFDADFQPDADFLRRTVPVLQADPAVALVQARWRVNADECILTRIQEMSLDYHFSVEQEVGSACHGFFGFNG  
TAGVWRVQALADAGGWKDRTTVEDMDLAVRASMRGWRFVYAGDVQRNELPSSFKAYRYQQHRWSCGPANLM  
RKMFEIVASRQVSAWKKVHVLYGFFVVRKVV AHLVTLFYCVVIPAYVLVGGQDVRLPKYVAMYVPAITLLNAVCTP  
RSWHLLVFWILFENVMSMHRSKATIIGLVEASRANNEWVVTEKLSVTSTPAATTTMATNKGAMKKKKSQSSILAPEIV  
MGLCLLYCAVYDIFFGHDHFVYLLMQSAAAFVIGFGYVGSQ

>CSLA\_2BL\_TGACv1\_129747\_AA0394630.1\_Triticum\_aestivumMRGVSMMLTMARAAWAAVRYAVVPLLQL  
AVYLCAAMSLMLFAERLYMGLVVAALWLRRRRRQRNPGRNKGDDDDGGAGDLESGGGEDLPMVLVQIPMFNEKQV  
YRLSIGAACGLWWPADKLVQVLDSTDAGIRALVEAECRRWAGKGVQIRYENRSNRSGYKAGAMREGLKKGYARDC  
ELVAVFDADFQPDADFLRRTVPVLQADPAVALVQARWRVNADECILTRIQEMSLDYHFSVEQEVGSACHGFFGFNG  
TAGVWRVQALADAGGWKDRTTVEDMDLAVRASMRGWRFVYAGDVQRNELPSSFKAYRYQQHRWSCGPANLM  
RKMFEIVASRQVSAWKKVHVLYGFFVVRKVV AHLVTLFYCVVIPAYVLVGGQDVRLPKYVAMYVPAITLLNAVCTP  
RSWHLLVFWILFENVMSMHRSKATIIGLVEASRANNEWVVTEKLSVTSTPAAATTMAANKGAMKKKKSQSSILAPEIV  
MGLCLLYCAVYDIVFGHDHFVYLLMQSAAAFVIGFGYVGSQ

>CSLA\_2DL\_TGACv1\_160461\_AA0550770.1\_Triticum\_aestivumMEKKRRSSISFLLSFGGGRRRMKGVSMMLT  
MARAAWAVRYAVVPLLQLAVYLCAAMSLMLFAERLYMGLVVAALWLRRRRRQRNPSRNGGDDDDLESGAAE  
DLPLVLVQIPMFNEKQVYRLSIGAACGLWWPADKLVQVLDSTDAGIRAMVEAECRRWAGKGVQIRYENRSNRSGY  
KAGAMREGLKKGAKDC ELVAVFDADFQPDADFLRRTVPVLQADPSVALVQARWRVNADECILTRIQEMSLDYHFS  
VEQEVGSACHGFFGFNGTAGVWRVQALADAGGWKDRTTVEDMDLAVRASMRGWRFVYAGDVQRNELPSSFKAY  
RYQQHRWSCGPANLMRKMFEIVASRQVSAWKKVHVLYGFFVVRKVV AHLVTLFYCVVIPAYVLVGGQDVRLPKY  
VAMYVPAITLLNAVCTPRSWHLLVFWILFENVMSMHRSKATIIGLVEASRANNEWVVTEKLSVTSSTPAATTTMATNK  
GATKKKKSQSSILAPEIVMGLCLLYCAVYDIVFGHDHFVYLLMQSAAAFVIGFGYVGSQ

>CSLA\_1AS\_TGACv1\_019142\_AA0061550.1

\_Triticum\_aestivumMSMLPMARAAWLVLRYAVVPLLQLAIYLCVVMMLFADRLYMGLVAVLWLYRRCRNRN  
QRNKGDDDNLESDDADRPMVLVQIPMFNEKQVFRLSIGAACGLWWPADKLVQVLDSDTAGIRSLVEAECRRWAG  
KGVHIRYENRSNRSGYKAGAMRDGLKKQYVKDCEVAVFDADFQPDADFLRHTVPVLEADPAVALVQARWRVFNAD  
ECILTRMQEMSLDYHFSVEQEVEGSAFHGFFSFNGTAGVWRHALADAGGWKDRTTVEDMDLAVRASMRGWRFVY  
AGDVQVRNELPSSFKAYRYQQRHWSCGPPNLMRKMFWEIFANKQVSAWKKLHVLYGFFVVRKVVVAHLATFLFCCVVI  
PVYVLVGGQDVWLPQYVPMYVAAVLTLNAVCTPRSCHLLVFWILFENVMSIHRCKATIIGLLEASRANEVWVTEKLG  
GSTTSTPAAATTTMVAKKKSSSSFLAPEIVMGLFLLYCALYDIVFGHDHFVYLLMQSAAAFVIGFGYVGSQ

>CSLA\_3AS\_TGACv1\_210508\_AA0674280.1\_Triticum\_aestivumMAMAATAWLWVEVPVRVDWPAVAAQCA  
WAGEQARAFLVVPVAVRLLVLLSLAMTVMILLEKLFVAAVCYAAKAFGHRPESRYQWRPIAASACKTGGDDEEDGIVVV  
GSAAFPVVLVQIPMYNEREVYKVSIGAACALEWPSDRMVIQVLDSDTDPVVKDLVKIECQRWKSkgvNIRYEVQRNRK  
GYKAGALKEGLMRDYVRECEFIAMFDADFQPESEFLLRTVPFLVHNPDIQVTRWKFVNSDECLLTRFQEMSLDYHFK  
FEQEAGSIVYSFFGFNGTAGVWRISAINDAGGWKERTTTVEDMDLAVRTALLGLKFVYVAVKVKSELPSTFKAYRFQQ  
HRWSCGPANLFKKVLVEILHNKKVSWFKLHLLYDFFVVGKITAHTVTFIYCFaipVSVFFPEIQIPLWCVVYVPTVITLCK  
ALGSPSSFHLVILWVLFDNVMSLHRIKATITGLLDARRVNEWVTEKLGDKANKTEPAVEGLNDVQVIDVELSTPLPKLE  
KRRTRLWDKYNCEIFVGTCTIICGCYDVLYANKGYIYLFIQGLAFLVIGFEYIGTRPPNTE

>CSLA\_3DS\_TGACv1\_272005\_AA0912960.1\_Triticum\_aestivumMAATAWLWAEVVPVRVDWAAVAAQCA  
WAGQQARALLVVPVTRLLVLLSLAMTVMILLEKLFVAAVCYAAKAFGHRPESRYRWRPIAASACKAGGGDEEDGIVIV  
GSSSGSAAFPVVLVQIPMYNEREVYKVSIGAACALEWPSDRMVIQVLDSDTDPVVKDLVKIECQRWKSkgvNIRYEVRE  
NRKGYKAGALKQGLMRDYVRECEFIAMFDADFQPESEFLLRTVPFLVHNPDIQVTRWKFVNSDECLLTRFQEMSLD  
YHFKFEQEAGSIVYSFFGFNGTAGVWRISAINDAGGWNDRTTVEDMDLAVRTALLGWKFVYVGDVVKRSELPSTFKAY  
RFQQHRWSCGPANLFKKMLVDILENKKVSWFKLHLLYDFFVVGKIAAHTLTFIYCFaipVSVFFPEIQIPLWGVVYVPT  
VITLCKSLGSPSSFHLVILWVLFENVMSLHRIKATITGLLDTRRVNEWVTEKLGDKANKTEPAMEGLDDVQVIDVELSTPL  
VPKLEKRRTRLWDKYNCEIPVGTCTIICGCYDVLYAKKGYIYLFIQGLAFLVVGFEYIGTRPPSAE

>CSLA\_3B\_TGACv1\_223332\_AA0780350.1\_Triticum\_aestivumMLLLKIDIAKAFDTSWEYILELLQRMNFP  
WRDRIALLSSVSSAYLLKGDGPAILHQRGLRQGDPLSAILFILVIVPLHRMLEAAQAGTIAPLPGAARLRVTLYADD  
AIFANPVRQEIDTIMQLLQGFGEAAGLRGNPQKSSAATLNYGSIDLIDVLKNFSGTRVGFPIRYLGLPLCIGRLPLCTR  
VGFPIRYLWLLGKANSCIAPPLAVASHVLVRCVLSALPAFAMAVLRIPKRFYKDVVKARWRFLWVHDHEVTGGRCVNW  
RLVTSVVDHGGLGIPSMERFARALCLRWLWLAWTDPARPWARMGTCPDDKDRALFASATTVTVDGDNVLFVHCS  
WLGEQPVRQDYPNLFRRSTRKNRMMADAIRDDRWIMDLRRSGAGEEVMAMAATAGLWAEVVRDLWATVAAQC  
ALAGEQARAFLVVPVAVRLLVLLSLAMTVMILLEKLFVAAVCYAAKALGHRPERRYKWGPVAASACKTGGDDEEDGIVG  
VSGSGSAAFPVVLVQIHMYNEREDLVKIECQRWKSkgvNIRYEVQRNRKGYKAGALKEGLIRDYVRECEFIAMFDAD  
FQPESEFLLRTVPFLVHNPDIQVTRWKFVNSDECLLTRFLEMSLDYHFKFEQEAGSIVYSFFGFNGTAGVWRISAIN  
DAGGWKERTMVEDMDLVVRTALLGLKFVYVAVKVKSELPSTFKAYRFQQHRWSCGPANLFKKMLVEILQNKKVSWF  
KLHLLYDFFVVGKIIAHIVTFIYCFATPVSVFFPEIQIPLWGVVYVPTVITLCKALGSPSSFHLVILWVLFDNVMSL  
HRIKATITGLLDARRVNEWVTEKLGDTNKTEPAMEGLNDVQVIDVELSTPLPKLEKRYNCEIFVGTCTIICGCYDVLY  
ANKGYIYLFIQGVAFLVIGFEYIGTRPPGAE

>CSLC\_1DL\_TGACv1\_062162\_AA0209740.1\_Triticum\_aestivumMAPWNGLWGGRAAIAGGNAYRDMPVIVK  
MENPNWSISEINGGDNGEDFLARVGGQRRRVKNTKQITWVFRKKAHRAAGCLARLTSAAVALGGAARRRVVAGRT

DSDAADGECEDVEERDPASRRSRFYTLIKACLMMMSVFLLVVELAAYSNGRVNLAIFINSFNNTSWIRFRATYVAPPLQLLA  
DACVVLFLVQSADRLFQSLGCFYILVKRIKPKPLSPALADAEDPDAGYYPMLVQIPMCNEKEVYRQSIAAVCNLDWPR  
SNFLVQVLDDSDDVATQALIKEEVEKWRHSGAHIVYRHRVLRREGYKAGNLKSAMSCSYVKDYEVVAIFDADFQYPDFL  
KRTVPHFKDNEDLGLVQARWSFVNKDENLLTRLQNLNLCFHFEVEQQVNGVFINFFGFNGTAGVWRIKAVEDSSGGW  
MERTTVEDMDIAVRAHLKGWKFVFLNDVECQCELPESYEAYRKQQRHWHSGPMQLFRLCLPDIIRCKIVFWKKANLIF  
LFFLLRKLILPFYSFTLFCIILPMTMFVPEAELPDWVVCYIPVLM SFLNIAPAPKSFPIIPYLLFENTMSVTKFNAMISGLFQ  
LGSTYEWVVTKSGRSLEGLDLSLAPKGLKQLKYGSVPAINVAIKEQSKAKKESKYNRIYKKELAMSLLLLSAAARSLLSK  
QGIHFYFLLFQGISFLLVGLDLIGQDIK

>CSLC\_1BL\_TGACv1\_030501\_AA0092480.1\_Triticum\_aestivumMENPNWSISEINIDDDNSEDFLARVGGQRR  
RVKNTKQITWVFRKKAHRAAGCLSWLTSAAFALGGATRRRVVAGRTDSNATDGECKDVEEWAPASRRSRFYTLIKACL  
MMFVCLLIVELAAYSNGKGNLAVFINSFNNTSWIRFRAAYIAPPLQLLANACVVLFLVQSADRVFQSLGCFYILVKRIKPKPL  
FLALSDAEDPDAGYYPMLVQIPMCNEKEVYRQSIAAVCNLDWPRSNFLVQVLDDSDDVTTQALIKDEVEKWRHSGA  
HIVYRHRVLRREGYKAGNLKSAMSCSYVKDYEVVAIFDADFQYPDFLKRTVPHFKDNEDLGLVQARWSFVNKDENLLTR  
LQNLNLCFHFEVEQQVNGVFINFFGFNGTAGVWRIKAVEDSSGGWMERTTVEDMDIAGWKVFLNDVECQCELPETY  
EAYRKQQRHWHSGPMQLFRLCLPDIIRCKIVFWKKANLIFLFFLLRKLILPFYSFTLFCIILPMTMFVPEAELPDWVVCYIP  
VLM SFLNIAPAPKSFPIIPYLLFENTMSVTKFNAMISGLFQLGSTYEWVVTKSGRSLEGLDLSLAPKGLKQLKYGSVPAI  
NVAIKEKAKKESKYNRIYKKELAMSLLLLSAAARSLLSKQGIHFYFLLFQGISFLLVGLDLIGQDIK

>CSLC\_5BL\_TGACv1\_404820\_AA1311790.1\_Triticum\_aestivumMAPWTGLWGARAGAGAGAYRGTTPVVV  
KMENPNWSISEISPEDAEDDFLVSGAGAARRSRKGGRGKNAKQITWVLLKKAHRAAGCLASLASAAVTLGAAARRRV  
ADGRTDADAGAPGSAGESPVLRSRYAFIRAFLLLSLLLAVELAARLHGWDLAASALALPIIGVESLYASWLRRLRAAYLAP  
LLQFLTDACVVLFIQSADRLIQCLGSFYITVKRIKPTLKSPALPDAEDPDAGYYPMLVQIPMCNEKEVYQQSIAAVCNL  
DWPRSNFLVQVLDDSDPTTQSLIREEVAKWQQTGARILYRHRVLRDGYKAGNLKSAMACSYVKDYEFVAIFDADFQP  
NPDFLKRTVPHFKDNDELGLVQARWSFVNKDENLLTRLQNLNLCFHFEVEQQVNGVFLNFFGFNGTAGVWRIKALEES  
GGWMERTTVEDMDIAVRAHLHGWKFI FLNDVECQCELPESYEAYRKQQRHWHSGPMQLFRLCIPDIISKISVWKKF  
NLIFLFFLLRKLILPFYSFTLFCIILPMTMFVPEAELPDWVVCYIPALMSLLNILPSPKSFPIIPHLLFENTMSVTKFNAMISG  
LFQLSAYEWVVTKSGRSSEGLDLSLAAAAPPRELRRHPKTGSAPSLEALMVLKEQQPSPKKEGKKQKQKHNRIYKKE  
ALSLLLTAAARSLLTKQGIHFYFLLFQGISFLLVGLDLIGEQVE

>CSLC\_5DL\_TGACv1\_435778\_AA1454840.1\_Triticum\_aestivumMAPWTGLWGARAGAGAYRGTTPVVVK  
MENPNWSISEISPEDAEDDFLVSGAGAARRRKGGRGKNAKQITWVLLKKAHRAAGCLASLASAAVTLGAAARRRVA  
DGRTDADAGATPGSAGESPVLRSRYAFIRAFLLLSLLLAVELAARFHGWDLAASALALPIIGVESLYASWLRRLRAAYLAP  
LLQFLTDACVVLFIQSADRLIQCLGSFYITVKRIKPRKSPALPDAEDPDAGYYPMLVQIPMCNEKEVYQQSIAAVCNL  
DWPRSNFLVQVLDDSDPTTQSLIREEVAKWQQTGARILYRHRVLRDGYKAGNLKSAMACSYVKDYEFVAIFDADFQP  
NPDFLKRTVPHFKDNDELGLVQARWSFVNKDENLLTRLQNLNLCFHFEVEQQVNGVFLNFFGFNGTAGVWRIKALEES  
GGWMERTTVEDMDIAVRAHLHGWKFI FLNDVECQCELPESYEAYRKQQRHWHSGPMQLFRLCIPDIISKISVWKKF  
NLIFLFFLLRKLILPFYSFTLFCIILPMTMFVPEAELPDWVVCYIPALMSLLNILPSPKSFPIIPYLLFENTMSVTKFNAMISGL  
FQLGSAYEWVVTKSGRSSEGLDLSLAAAAPPRELRRHPKTGSAPSMEALMVLKEQQPSPKKEGKKQKQKHNRIYKKE  
LALSLLLTAAARSLLTKQGIHFYFLLFQGISFLLVGLDLIGEQVE

>CSLC\_5AL\_TGACv1\_374268\_AA1195590.3\_Triticum\_aestivumMAPWTGLWGARAGAGAYRGTTPVVVKME  
NPNWSISEISPEDAEDDFLVSGAARRKGGRGKNAKQITWVLLKKAHRAAGCLASLASAAVTLGAAARRRVADGRTD



DAGAPGPARESPVLRSRFYAFIRAFLLLSLLLLAVELAAARFHRWDLAASALALPIIGVESLYASWLRRLRAAYLAPLLQFLTDA  
CVVFLIQSADRLIQCLGSFYITVKRIKPRLRSPALPDAEDPDAGYYPMLVQIPMCNEKEVYQQSIAAVCNLDWPRSNF  
LVQVLDSDDDPTTQSLIREEVAKWQQTGARILYRHRVLRDGYKAGNLKSAMACSYVKDYEFVAIFDADFQPNPDFLKR  
TVPHFKNDELGLVQARWSFVNKDENLLTRLQINLFCFHFEVEQQVNGVFLNFFGFNGTAGVWRKALEESGGWME  
RTTVEDMDIAVRAHLHGWKFIPLNDVECQCELPESYEAYRKQQRHWSGPMQLFRLCIPDIKSKISVWKKFNLIFFL  
LRKLILPFYSFTLFCIILPMTMFVPEAELPDWVVCYIPALMSLLNILPSPKSVFPIPYLLFENTMSVTKFNAMISGLFQLGSA  
YEWVVTKKSGRSSEGLDISLAAAAPPRELRQQQKTGSAPSLEALMVLKEEQASPRKEGKKQKKHNRIYKELALSLLLLTA  
AARSLTKQGIHFYLLFQGISFLLVGLDLIGEQUE

>CSLC\_1DL\_TGACv1\_061928\_AA0205730.1\_Triticum\_aestivumMAPSFWGREARLSDGGGGTPVVVKMENP  
NWSISEMEQEAVPGSPAGLAAGKAGRGKGNARQITWVLLKHAHRAAGRLTGAASAALAVAAAARRRVAAGRTDGDAA  
PGESTALRARFYGCLRFLVVLMSLLLAVEVAAYLQGWHLQMPPEMPGQLAMDGLLAVDGLAASAYAGWMRVRL  
QYIAPPLQFLTNSCVVLFMIQSVDRVLCLGCLWIKLRGKIPVPIAADKDDVEAGDEDFPMVLVQMPMCNEREVYQQSI  
GAICALDWPRSNFLVQVLDSDDDATTSALIKEEVEKWQREGVRIVYRHRVIRDGYKAGNLKSAMNCSYVKDYEVVIFD  
ADFQPQADFLKRAMPHFKGKDDVGLVQARWSFVNNDENLLTRLQINLFCFHFEVEQQVNGAFLNFFGFNGTAGVW  
RIKALEDSSGGWMERTTVEDMDIAVRAHLKGWKFLYLNDVECQCELPESYEAYRKQQRHWSGPMQLFRLCFVDIIS  
KIGFWKKCNLIFLFLLRKLILPFYSFTLFCVILPMTMFVPEALPAWVVCYIPATMSIMSILPSPKSFPIVYLLFENTMSV  
TKFNAMISGLFQLGSAYEWVVTKKSGRSSEGLLVALVEKHTVQQQQRVGSAPDLAAGLAAKDSLPPKDPKPKKQKHN  
RIYRKELALSLLLLTAAARSVLSAQGIHFYLLFQGVSFVLMGLDLIGEQUE

>CSLC\_1BL\_TGACv1\_030750\_AA0099830.1\_Triticum\_aestivumMAPSFWGREARLSDGGGGTPVVVKMENP  
NWSISEMEQEAVPGSPAGLAAGKAGRGKGNARQITWVLLKHAHRAAGRLTGAASAALAVAAAARRRVAAGRTDGDAA  
PGESTALRARFYGCLRFLVVLMSLLLAVEVAAYLQGWHLQMPPEMPGQLAMDGLLAVDGLAAAAYAGWMRVRL  
QYIAPPLQFLTNSCVVLFMIQSVDRILCLGCLWIKLRGKIPVPIAADKDDVEAGEEDFPMVLVQMPMCNEREVYQQSI  
GAICALDWPRSNFLVQVLDSDDDATTSALIKEEVEKWQREGVRIVYRHRVIRDGYKAGNLKSAMNCSYVKDYEVVIFD  
ADFQPQADFLKRAMPHFKGKDDVGLVQARWSFVNNDENLLTRLQINLFCFHFEVEQQVNGAFLNFFGFNGTAGVW  
RIKALEDSSGGWMERTTVEDMDIAVRAHLKGWKFLYLNDVECQCELPESYEAYRKQQRHWSGPMQLFRLCFVDIIS  
KIGFWKKCNLIFLFLLRKLILPFYSFTLFCVILPMTMFVPEALPAWVVCYIPATMSIMSILPSPKSFPIVYLLFENTMSV  
TKFNAMISGLFQLGSAYEWVVTKKSGRSSEGLLVALVEKHTVQQQQRVGSAPDLAAGLAAKDSLPPKDPKPKKQKHN  
RIYRKELALSLLLLTAAARSVLSAQGIHFYLLFQGVSFVLMGLDLIGEQUE

>CSLC\_1AL\_TGACv1\_001272\_AA0028090.1\_Triticum\_aestivumMAPSFWGREARLSDGGGGTPVVVKMENP  
NWSISEMEQEPVPGSPAGLAAGKAGRGKGNARQITWVLLKHAHRAAGRLTGAASAALAVAAAARRRVAAGRTDGDAA  
PGESTALRARFYGCLRVFVVLMSLLLAVEVAAYLQGWHLQMPQMPPEMPGQLAMDGLLAVDGLAAAAYAGWMRVR  
LQYIAPPLQFLTNSCVVLFMIQSVDRVLCLGCLWIKLRGKIPVPIAADKDDVEAGDEDFPMVLVQMPMCNEREVYQQ  
SIGAICALDWPRSNFLVQVLDSDDDATTSALIKEEVEKWQREGVRIVYRHRVIRDGYKAGNLKSAMNCSYVKDYEVVIF  
DADFQPQADFLKRAMPHFKGKDDVGLVQARWSFVNNDENLLTRLQINLFCFHFEVEQQVNGAFLNFFGFNGTAGV  
WRKALEDSSGGWMERTTVEDMDIAVRAHLKGWKFLYLNDVECQCELPESYEAYRKQQRHWSGPMQLFRLCFVDII  
KSKIGFWKKCNLIFLFLLRKLILPFYSFTLFCVILPMTMFVPEALPAWVVCYIPATMSIMSILPSPKSFPIVYLLFENTM  
SVTKFNAMISGLFQLGSAYEWVVTKKSGRSSEGLLVALVEKHTAQQQQRVGSAPDLAAGLAAKDSLPPKDPKPKKQKHN  
NRIYRKELALSLLLLTAAARSVLSAQGIHFYLLFQGVSFVLMGLDLIGEQUE

>CSLC\_3DL\_TGACv1\_251593\_AA0882850.1\_Triticum\_aestivumMAPWWGQEARGGVSGGVTGTPVVVKMQ  
TPDWAISEVPPPSPAAGGKDGRGKNARQITWVLLLKAHRAAGKLTGAATAALSVAARRRVAAGRTDSDADNAP  
PGLGGSPALRTRLYGFIRASLLSVLLLAADVAHAHQGWHLAALPDLEAVEGLFAAGYAAWMRARAAYLGPALQFLT  
ACVVLFMIQSADRLILCLGCFWIKLRGIRPVPNAAAAAGNGNGKGSDDVEAGAQQEEDFPMVLVQIPMCNEKEYVQ  
SIGAVCNLDWPRSNFLVQVLDDSDAATSALIREEVEKWQREGVRVLYRHRVIRDGYKAGNLKSAMNCSYVKDYEFV  
IFDADFQPQEDFLKLTVPHFVKGEDVGLVQARWSFVNKDENLLTRLQINLFCFHEVEQQVNGAFLNFFGFNGTAGV  
WRIKALEDSSGGMERTTVEDMDIAVRAHLKGWKFLYLNDVECQCELPESYEAYRKQQRHWHSGPMQLFRLCFVDII  
KSKIGFWKKFNLIFFLLRKLILPFYSFTLFCVILPMTMFAPEAELPAWVVCYIPATMSLLNILPAPKSFPIVYLLFENTM  
SVTKFNAMISGLFQLGSAYEWWVTKKSGRSSEGLVALVENEKQSKQLRVGSAPNLDLAAKEELYPKAEPKPKKKKH  
RLYRKELALSFLLLTAAARSLLSVQGIHFYLLFQGVSVLVGLDLIGEQUE

>CSLC\_3AL\_TGACv1\_197197\_AA0665370.1\_Triticum\_aestivumMAPWWGQEARGGVSGGVTGTPVVVKMQ  
TPDWAISEVPPPSPAAGGKDGRGKNARQITWVLLLKAHRAAGKLTGAATAALSVAARRRVAAGRTDSDADADG  
APPGPGAGRPALRTRLYGFIRASLLSLLLAADVAHAHQGWHLAALPDLEAVEGLFAAGYAAWMRARAAYLGPALQF  
LTNACVVLFMIQSADRLILCLGCFWIKLRGIRPVPNAAATAGNGKGSDDVEAGAQQEEDFPMVLVQIPMCNEKEYVQ  
QSIGAVCNLDWPRSNFLVQVLDDSDAATSALIREEVEKWQREGVRILYRHRVIRDGYKAGNLKSAMNCSYVKDYEFV  
VIFDADFQPQEDFLKLTVPHFVKGEDVGLVQARWSFVNKDENLLTRLQINLFCFHEVEQQVNGAFLNFFGFNGTAGV  
WRIKALEDSSGGMERTTVEDMDIAVRAHLKGWKFLYLNDVECQCELPESYEAYRKQQRHWHSGPMQLFRLCFVDII  
KSKIGFWKKFNLIFFLLRKLILPFYSFTLFCVILPMTMFAPEAELPAWVVCYIPATMSLLNILPAPKSFPIVYLLFENTM  
SVTKFNAMISGLFQLGSAYEWWVTKKSGRSSEGLVALVENEKQSKQQRVGSAPNLDLAAKEELYPKSEPKKKKHNL  
YRKELALSFLLLTAAARSLLSVQGIHFYLLFQGVSVLVGLDLIGEQUE

>CSLC\_3DS\_TGACv1\_271926\_AA0910940.1\_Triticum\_aestivumMASSWWGDKEEHGTPVVVKMDNPYSLVEI  
DGPMDSSEKARRSKNAKQFKWVLLRAHRAVGCVAWLAGGFVGLLGAVNRRVRRSRDADAEPDAEASGRGRHM  
LGFLRAFLLSLAMLAFFETAAYLKGWHYFPRDLPEHYLRQLPEHLQNLPEHLRHLPENLRHLPDGLRMPEQQ  
EIQGWLHRAVVAWLAFRIDYIAWAIEKLSGFCIVLFMVQSIDRILLCLGCFWIKLRGIKPLKAAANKRGSKYADDDLE  
DGDDLGAFFPMVLLQMPMCNEKEYVETSISHVCQIDWPRDRMLVQVLDDSDDETCQMLIRAEVTKWNQRGVNIIYR  
HRLSRTGYKAGNLKSAMSCEYVKDYEFVAIFDADFQPNPDFLKLTVPHFKNPELGLVQARWSFVNKDENLLTRLQIN  
LFCFHEVEQQVNGIYLNFFGFNGTAGVWRIEALEDSSGGMERTTVEDMDIAVRAHLQGWKFIYLNVDKVLCELPESY  
QAYRKQQRHWHSGPMQLFRLCLPAIISKIPLWKKANLVMFFLLRKLILPFYSFTLFCVILPLTMFVPEAELPIWVICYP  
MIMSVLNILPAPKSFPIVYLLFENTMSVTKFNAMVSGLFQLGSSYEWVTKKAGRTSSESDIFAMAEETDTATRPAPR  
LVRGVSEAGLEAWAKTHQLDNKDLQKAQAEVTSLAAAIKTSKAKPPNRIKKELALAFLLIIATRSLLSAQGLHFYFL  
LFQGVTFVLVGLDLIGEQVS

>CSLC\_3B\_TGACv1\_220758\_AA0718310.2\_Triticum\_aestivumMASSWWGDKEEHGTPVVVKMDNPYSLVEID  
GPGMDSSEKARRSKNAKQFKWVLLRAHRAVGCVAWLAGGFVGLLGAVNRRVRRSRDADAEPDAEASGRGRHML  
GFLRAFLLSLAMLAFFETAAYLKGWHYFPRDLPEHYLRQLPEHLQNLPENLRHLPENLRHLPDGLRMPEQQEIQGWLH  
RAYVAWLAFRIDYIAWAIEKLSGFCIVLFMVQSIDRILLCLGCFWIKLRGIKPLKAAASKRGSKYADENDLEDGDDLGA  
FPMVLLQMPMCNEKEYVETSISHVCQIDWPRDRMLVQVLDDSDDETCQMLIRAEVTKWSQRGVNIIYRHRLSRTGYK  
AGNLKSAMSCEYVKDYEFVAIFDADFQPNPDFLKLTVPHFKNPELGLVQARWSFVNKDENLLTRLQINLFCFHEVEQ  
QVNGIYLNFFGFNGTAGVWRIEALEDSSGGMERTTVEDMDIAVRAHLQGWKFIYLNVDKVLCELPESYQAYRKQQRH  
RWHSGPMQLFRLCLPAIISKIPLWKKANLVMFFLLRKLILPFYSFTLFCVILPLTMFVPEAELPIWVICYPMIMSVLNIL  
PAPKSFPIVYLLFENTMSVTKFNAMVSGLFQLGSSYEWVTKKAGRTSSESDIFAMAEETNTATRPAPRLVRGVSEA

GLEAWAKTHQLDNKDLQLKAEAEVTSLAAAIKKTSAKPPNRIFFKELALAFLLLIAATRSLLSAQGLHFYLLFQGVTF  
VVGLDLIGEQVS

>CSLC\_3AS\_TGACv1\_211225\_AA0686890.2\_Triticum\_aestivumMASSWWGDKEEHGTPVVVKMDNPYSLVEI  
DGPMDSSSEKARRSKNAKQFKWVLLRAHRAVGCVAWLAGGFVGLLGAVNRRVRRSRDADAEPDAEASGRGRHM  
LGFLRAFLLSLAMLAFETAAYLKGWHYFPRDLPEHYLRQLPEHLQNLPEHLRHLPENLRHLPDGLRMPEQEQEIQGWLH  
RAYVAWLAFRIDYIAWAIEKLSGFCIVLFMVQSIDRILLCLGCFWIKVGRGKPLVATKKRGNKYADDNDLEDGDDL  
GAYFPMVLLQMPMCNEKEYETSISHVCQIDWPRDRMLVQVLDDSDDETQMLIRAEVTKWNQRGVNIIYRHRLSRTGYK  
AGNLKSAMSCEYVKDYEFVAIFDADFQPNPDFLKLTPHFKGNPELGLVQARWSFVNKDENLLTRLQINILCFHFEVEQ  
QVNGIYLNFFGFNGTAGVWRIEALEDSSGWMERTTVEDMDIAVRAHLQGWKFIYLNVDKVLCELPESYQAYRKQQH  
RWHSGPMQLFRLCLPAIISKIPLWKKANLVMLFFLLRKLILPFYSFTLFCVILPLTMFVPEAELPIWVICYPMIMSVL  
NILPAPKSFPIVYLLFENTMSVTKFNAMVSGFLQLGSSYEWVVTKKAGRTSSESDIFAMAECTDTATRPAPRLVRGVSEA  
GLEAWAKTHQLDNKDLQLKAEAEVTSLAAAIKKTSAKPPNRIFFKELALAFLLLIAATRSLLSAQGLHFYLLFQGVTF  
VVGLDLIGEQVS

>CSLD\_2BS\_TGACv1\_148683\_AA0494520.1\_Triticum\_aestivumMSKAPRNPGGGSAGAPKSSSGQPVKFARRT  
PSGRYLSLSREDIDMEGEMGPDYANYTVHIPPTPDNQPMDKGSEPTAVAMKAEEQYVNSLFTGGFNSVTRAHLM  
RVIDSDVKHPQMAGAKATRCAMPACDGKVMRNERGEEVDPCECRFKICRDCYLAQKDGCLCPGCKEYKIGDYAD  
DDPHDVSAGKSLARNQNGEFDHNRWLFESSGTGYGNFMPKGGMYEDDLDEDGAGDGGMPADLSQKPKPL  
TRKIPMPTSIISPYRIFIVIRFFVLIFYLTVRIRNPNMEALWLWGMMSIVCELWFAFSWLLDMLPKVNPINRSTDLAVLKEK  
ETHSPSNPHGRSDLPGLDVFVSTADPEKEPVLTANTILSILAVDYPVEKLACYVSDDGALLTFEAMAEASFANIWVP  
FCKKHDIERNPDSYFALKGDPTKGRRSDFVKDRRKKREYDEFKVRINGLPDSIRRRSDFNAREDMKMLKHLRETG  
ADPSEQPKVKKATWMADGTHWPGTWAVSSPDHAKGNHAGILQVMLRPPSPDPLYGMHDEDQLVDYSDVDTRL  
MLVYMSREKRPGYDHKKAGAMNALVRCSAVMSNAPFILNFDCHYINNTQAIREAMCFMMDRGGERICYIQFPQR  
FEGIDPSDRYANHTVFFDGNMRALDGLQGPMYVGTGCMFRRFALYGFDPPTAEYTGWLFKKKKVTNFKDPESDT  
QQLKAEDFDAELTAQLVPRRFGNSSAMLASIPIAEFQARPIADHPAVLHGRPPGTLTVPRPLDPPTVAEAVSVISCWYE  
DKTEWGDRVWYGSVTEVVYGYRMMHNRGWRVYVWISKRDAFLGTAPINMTDRLHQVLRWATGSVEIFFSRNNA  
FLASRKLMLQVRVAYLNVGIYPFTSIFLLTYCFIPALSLSFGFFVQTLNVAFLFYLLTITVTLIALGILEVKWVSGIELEDWWRN  
EQFWLISGISAHLVAVVQGLLKVMAGIEISFTLTAKAAAEDNEDIYADLYVVKWSSLLIPPITIGMLNIIAIAFARTIYSD  
NPRWGKFIGGGFFSWVLAHLNPFAGLMGRRGKTPTIIFVWVSLISITISLLWVALSPEANSTGGARGGGFQFP

>CSLD\_2DS\_TGACv1\_177279\_AA0572180.1\_Triticum\_aestivumMSKAPRNPGGGSAGAPKSSSGQPVKFARR  
TPSGRYLSLSREDIDMEGEMGPDYANYTVHIPPTPDNQPMDKGAERTAVAMKAEEQYVNSLFTGGFNSVTRAHLM  
DRVIDSDVKHPQMAGARPARCAMPACDGKVMRNERGEEIEPCECRFKICRDCYLAQKDGCLCPGCKEYKIGDYAD  
DDTHDVSAGKSLARNQNGEFDHNRWLFESSGTGYGNFMPKGGMYEDDLDEDGAAGDDGMQDMNQKPKPL  
TRKIPMPASIIISPYRIFIVIRFFVLIFYLTVRIRNPNMEALWLWGMMSIVCELWFAFSWLLDMLPKVNPINRSTDLAVLKEK  
FETPSPSNPHGRSDLPGLDVFVSTADPEKEPVLTANTILSILAVDYPVEKLACYVSDDGALLTFEAMAEASFANIWVP  
FCKKHDIERNPDSYFALKGDPTKGRRSDFVKDRRKKREYDEFKVRINGLPDSIRRRSDFNAREDMKMLKHLRETG  
ADPSEQPKVKKATWMADGTHWPGTWAVSSPDHAKGNHAGILQVMLRPPSPDPLYGMHDEDQLIDYSDVDTRLPM  
LVYMSREKRPGYDHKKAGAMNALVRCSAVMSNAPFILNFDCHYINNNQAVREAMCFMMDRGGERICYIQFPQR  
FEGIDPSDRYANHTVFFDGNMRALDGLQGPMYVGTGCMFRRFALYGFDPPTAEYTGWLFKKKKVTNFKDPESDT  
QQLKAEDFDAELTAQLVPRRFGNSSAMLASIPIAEFQARPIADHPAVLHGRPPGTLTVPRPLDPPTVAEAVSVISCWYE  
DKTEWGDRVWYGSVTEVVYGYRMMHNRGWRVYVWISKRDAFLGTAPINMTDRLHQVLRWATGSVEIFFSRNNA

FLASRKLMLQRVAYLNVGIYPFTSIFLLTYCFIPALSLSFGFFIVQTLNVAFLFYLLTITVTLIALGILEVKWWSGIELEDWWRN  
EQFWLISGISAHLAVVQGLLKVMAGIEISFTLTAKAAAEDNEDIYADLYVVKWSSLLIPPITIGMLNIIAIAFAFARTIYSD  
NPRWGKFIGGGFFSFVWLAHLNPFAGLMGRRGKTPTIIFVWSGLISITISLLWVALSPPEANSTGGARGGGFQFP

>CSLD\_2AS\_TGACv1\_114244\_AA0365360.1\_Triticum\_aestivumMSKAPRNPGGGSAGAPKSSSQPVKFARR  
TPSGRYLSLSREDIDMEGEMGPDYANYTVHIPPTPDNQPMKDGAEPTAVAMKAEQYVNSLFTGGFNSVTRAHLM  
DRVIDSDVKHPQMAGAKATRCAMPACDGKVMRNERGEEIDPCECRFKICRDCYLDQAQKDGCLCPGCKEYKIGDYAD  
DDPHDVSSGKSLARNQNGEFDHNRWLFESSGTGYGNAFMKGGMYEDDLDEDGVDGGMQDMNQKPKFKPL  
TRKIPMPTSIIISPYRIFIVIRFFVLIFYLTVRIRNPNMEALWLWGMMSIVCELWFAFSWLLDMLPKVNPINRSTDLAVLKEKF  
ETPSPSNPHGRSDPLGLDIFVSTADPEKEPVLTTANTILSILAVDYPVEKLACYVSDDGALLTFEAMAEASAFANIWVVPF  
CKKHDIENRNPDSYFALKGDPTKGRRSDFVKDRRKKREYDEFKVRINGLPDSIRRRSDFNAREDMKMLKHLRETGA  
DPSEQPKVKKATWMADGTHWPGTWAVSSPDHAKGNHAGILQVMLRPPSPDPLYGMHDEDQLIDYSVDVTRLPLML  
VYMSREKRPGYDHNKAGAMNALVRCSAVMSNAPFILNFDCHYINNNQAVREAMCFMMDRGGERICFIQFPQRF  
EGIDPSDRYANHNTVFFDGNMRALDGLQGPMYVGTGCMFRRFALYGFDPPTAEYTGWLFKKKKVTNFKDPDSDTQ  
QLKAEDFDAELTAQLVPRRFGNSSAMLASIAIEFQARPIADHPAVLHGRPPGTLTVPRPLDPPTVAEAVSVISCWYED  
KTEWGDVRGWIYGSVTEDEVVTGYRMHNRGWRSVYWISKRDAFLGTAPINMTDRLHQVLRWATGSVEIFFSRNNAFL  
ASRKLMLQRVAYLNVGIYPFTSIFLLTYCFIPALSLSFGFFIVQTLNVAFLFYLLTITITLIALGILEVKWWSGIELEDWWRNEQ  
FWLISGISAHLAVVQGLLKVMAGIEISFTLTAKAAAEDNEDIYADLYVVKWSSLLIPPITIGMLNIIAIAFAFARTIYSENPR  
WGKFIGGGFFSFVWLAHLNPFAGLMGRRGKTPTIIFVWSGLISITISLLWVALSPPEANSTGGARSGGFQFP

>CSLD\_1BL\_TGACv1\_030586\_AA0094860.1\_Triticum\_aestivumMGSKGILKNSGSSRMPPHGSPKPTAPTASAP  
QVVFGRRTESGRFISYRDDLSEISSVDFQDYHVHMPMPDNQPMEEEDGTKADEQYVSSSLFTGGFNSVTRAHVMDK  
QGPDSDIGRSGPKGSICMVEGCDSKIMRNGRGEDILPCECDFKICVDCFTDAVKGGGVCPCGCKELYKHTEWEEVLSN  
SSNELTRALSPLHGGPKMERRLSLVKQGTMMNNQSGEFDHNRWLFETKGTGYGNAIWPDDNVDDDGRNGVPGHP  
KELMSKPWRPLTRKLQIPAAVISPYRLLVLIRLVALAFFLMWRIKHQNDDAIWLWGMMSIVCELWFAFSWVLDQLPKLCP  
INRATDLSVLKEKFETPTPSNPTGKSDLPGIDIFVSTADPEKEPVLVTANTILSILAVDYPVDKLACYVSDDGALLTFEAM  
AEAASFANFWVPFCRKHDIENRNPDSYFNLRDPFKNKVKADFVKDRRRRIKREYDEFKVRVNGLPDSIRRRSDAYHARE  
EIQAMNLQREKIKAGGDEQFEPVKIPKATWMADSTHWPGTWIHSSQDHARGDHAGIIQVMLKPPSDMPMYGNIK  
SPLDFSEVDTRLPLMLVYMSREKRPGYDHNKAGAMNALVRASAIMSNGPFILNLDCHYVYNSKAFREGMCFMMDR  
GGDRLCYVQFPQRFEGIDPSDRYANHNTVFFDINMRALDGLQGPVYVGTGCLFRRIALYGFDPPTSKDHSPGFCGCL  
PRRRKASASNANPEETMALRMGDFDGDMSMLATFPKFKGNSFLIDSIPVAEFQGRPLADHPSVKNRPPGALTIPREI  
LDASIVAEAISVSCWYEEKTEWGTTRGVWYGSVTEDEVVTGYRMHNRGWKSVYCVTQRDAFRGTAPINLTDRLHQV  
RWATGSVEIFFSRNNALFASKMKVLQRIAYLNVGIYPFTSIFLIVYCFLPALSLSFGQFIVQTLNVTFLLYLLIITLCLLAML  
EIKWSGIALEEWWRNEQFWLIGGTSAHLAAMVQGLLKVVAGIEISFTLTSKQVGGDDIDFAELYEVKWTSLMIPPLTII  
MVNLVAIAVGFSTIYSTIDIDDEFAELYEVKWTSLMIPPLTIIIMVNLVAIAVGFSTIYSTIPQWSKLLGGVFFSFVWLAHL  
YPAKGLMGRRGRTPTIVYVWAGLVSITISLLWIAINPPSSAANQQLGGSFSP

>CSLD\_1AL\_TGACv1\_001700\_AA0034150.2\_Triticum\_aestivumMGSKGILKNSGSSRVPPHGSPKPTAPTASAP  
QVVFGRRTESGRFISYRDDLSEISSVDFQDYHVHMPMPDNQPMEEEDGTKADEQYVSSSLFTGGFNSVTRAHVMDK  
QGPDSDMGRSGPKGSICMVEGCDSKIMRNGRGEDILPCECDFKICVDCFTDAVKGGGVCPCGCKELYKHTEWEEVLS  
NSSNELTRALSPLHGGPKMERRLSLVKQGTMMNNQSGEFDHNRWLFETKGTGYGNAIWPDDNVDDDGRNGVPG  
HPKELMSKPWRPLTRKLQIPAAVISPYRLLVLIRLVALAFFLMWRIKHQNDDAIWLWGMMSIVCELWFALSWVLDQLPKL  
CPINRATDLSVLKEKFETPTPSNPTGKSDLPGIDIFVSTADPEKEPVLVTANTILSILAVDYPVDKLACYVSDDGALLTFEA

MAEASFANFWVPFCRKHDIEPRNPDSYFNLRDPFKNKVKADFKDRRRIKREYDEFKVRVNGLPDSIRRRSDAYHAR  
EEIQAMNLQREKIKAGGDEQFEPVKIPKATWMADSTHWPGTWIHPSQDHARGDHAGIIQVMLKPPSDMPMYGNIE  
KSPLDFSGVDTRLPLMLVYMSREKRPGYDHNKKAGAMNALVRASAIMSNGPFILNLDCHYVYNSKAFREGMCFMMD  
RGGDRLCYVQFPQRFEGIDPSDRYANHNTVFFDINMRALDGLQGPVYVGTGCLFRRIALYGFDPPrSKDHSPGFCGCC  
LPRRRKASASNANPEETMALRMGDFDGDMSNLATFPKKGFNSSFLIDSIPVAEFQGRPLADHPSVKNRPPGALTIPRE  
ILDASIVAEAISVVSCWYEEKTEWGTRVGVWYIGSVTEDVVTGYRMHNRGWKSVYCVTQRDAFRGTAPINLTDRLHQVL  
RWATGSVEIFFSRNNALFASKMKVLQRIAYLNVGIYPFTSIFLIVYCFLPALSLSFGQFIVQTLNVTFLLYITVTLLCLLAM  
LEIKWSGIALEEWWRNEQFWLIGGSAHLAAVMQGLLKVVAGIEISFTLTSKQVGGDDIDDEFAELYEVKWTSLMIPPLTI  
IMVNLVAIAVGFSTRYIYSTIPQWSKLLGGVFFSFWVLAHLYPFAKGLMGRRGRTPPTIVYVWAGLVSITISLLWIAINPPST  
AANQQLGGSFSFP

>CSLD\_1BS\_TGACv1\_049706\_AA0160220.1\_Triticum\_aestivumMSCKMRGCDMLALAATRPMICEECYMDCV  
AASGNCPGCKEAYSAGSDTDDSVDEDDDDAISSEERDQMPMTSMSKRFSMVHSIKMPMSSSNDKPADFDHARWL  
FETKGTYSYGNALWPENEHGGGNNAGATFGVGVIEPPNFATWMSDGSQWASTWLAGATDHARGNHAGIIQRP  
GYNHNKKAGAMNALVRTSAIMSNGPFILNLDCHYVHNSAALREGMCYMLDCRGRVYVQFPQRFEGIDPNDRYA  
NHNLVFFDVAMRAMDGLQGPVYVGGCIFRRIALYGFSPPRATKHHGWLGRKIKLFLRKPTMGKKTRELVMAILQK

>CSLD\_1DL\_TGACv1\_063091\_AA0223780.1\_Triticum\_aestivumMGSKGILKNSGSSRVPPHGPSKPPTAPTAP  
QVVFGRRTESGRFISYSRDDLDSEISSVDFQDYHVHIPMTPDNQPMEEEDGKKADEQYVSSSLFTGGFNSVTRAHVMDK  
QGPDSDMGRSGPKGSICMVEGCDSKIMRNGRGEDILPCECDFKICVDCFTDAVKGGRGVCPGCKELYKHTEWEEVLS  
NSSNELTRALSPLHGPGGKMERRLSLVKQGTMMNNQSGEFDHNRWLFETKGTYGYGNAIWPDNDVDDGRNGVPG  
HPKELMSKWRPLRTRKLIQIPAAVISPYRLLVLIRLVALAFFLMWRIKHQNDDAIWLWGMISVCELWFALSWVLDQLPKL  
CPINRATDLSVLKEKFETPTPSNPTGKSDLPGIDIFVSTADPEKEPVLVTANTILSILAVDYPVDKLACYVSDGGALLTFA  
MAEASFANFWVPFCRKHDIEPRNPDSYFNLRDPFKNKVKADFKDRRRIKREYDEFKVRVNGLPDSIRRRSDAYHAR  
EEIQAMNLQREKIKAGGDEQFEPVKIPKATWMADSTHWPGTWIHSSQDHARGDHAGIIQVMLKPPSDMPMYGNIE  
KSPLDFSEVDTRLPLMLVYMSREKRPGYDHNKKAGAMNALVRASAIMSNGPFILNLDCHYVYNSKAFREGMCFMMD  
RGGDRLCYVQFPQRFEGIDPSDRYANHNTVFFDINMRALDGLQGPVYVGTGCLFRRIALYGFDPPrSKDHSPGFCGCC  
LPRRRKASASNANPEETMALRMGDFDGDMSNLATFPKKGFNSSFLIDSIPVAEFQGRPLADHPSVKNRPPGALTIPRE  
ILDASIVAEAISVVSCWYEEKTEWGTRVGVWYIGSVTEDVVTGYRMHNRGWKSVYCVTQRDAFRGTAPINLTDRLHQVL  
RWATGSVEIFFSRNNALFASKMKVLQRIAYLNVGIYPFTSIFLIVYCFLPALSLSFGQFIVQTLNVTFLLYITVTLLCLLAM  
LEIKWSGIALEEWWRNEQFWLIGGSAHLAAVMQGLLKNSTK

>CSLD\_5BS\_TGACv1\_425241\_AA1392650.1\_Triticum\_aestivumMSRRLSLPAGSPVTVTVSPTKKGAGGGSP  
GDGVVRRGSGLTSPVPRHSIGSSTATLQVSPVRRSGSRYASRDGADASAEFVHYTVHIPPTDRTTASASTDVPAAEEE  
GEVLPQRSYVSGTIFTGGLNCATRAHVLSNSADGARPAASANMSCKMRGCDMPAFLNAGRGGHPPCDCGFMICEEC  
YMDCVAAAGNCPGCKEAYSAGSDTDDSVDEDDDDAISSEERDQMPMTSMSKRFSMVHSIKMPMPPSSNGKPADFD  
HARWLFETKGTYGYGNALWPKNEHGGGNNAGATSGFVGVIEPPNFGARCRRLRTRKTSVSQAILSPYRMLIAIRLVAL  
GFFLAWRIRHPNDAMWLWALSVTCEVWFASFLLSLPKLCPVNRSCDLVDLADRFEPTARNPKGRSDLPIDVF  
VSTADPEKEPPLVTANTILSILAADYPVEKLACYLSDDGGALLTFEALAEASAFARTWVPFCRKHGVEPRCPESYFGQKR  
FLKNKVRDLDFVRERRKVKREYDEFKVRVNSLTEAIRRRSDAYNAGEELRARRRLQEEAVAAGGALGTAPLAETGAVKAT  
WMSDGSQWPGTWLTGATDHARGNHAGIIQAMLAPPTSEPLVGGEPAESGALIDTTGVDIRLPLMLVYVSRKRPGYD  
HNKKAGAMNALVRTSAIMSNGPFILNLDCHYVHNSAALREGMCYMLDRGGDRVYVQFPQRFEGIDPNDRYANH  
NLVFFDVAMRAMDGLQGPVYVGTGCFRRTALYGFSPPRATEHHGWLGRKIKLFLRKPTMGKKTRESEHESMLPP

IEDDDHNQLGDGVRGDL LLPQQR TVRHPADEAPAARGLLQRGHVPVHLHVP HRLLRAPGR LPLHRQVHRPAPERHVP  
RLPAHHHHH HAVPAGAAGDQVVRDHAARVVAQRAVLGDRRHQRAPGCGAAGPPQGDRRRGHLLHAHVQAGR RRR  
RGGGHVVRGAVRGAVELPDGAPRDHDAERGGAGGGGDGEDAVQRVPAVEQAAGRLLQLLGAVPPLPL

>CSLD\_5DS\_TGACv1\_457675\_AA1488780.1\_Triticum\_aestivumMSRRLSLPASSPVT TVSPTRGKGAGGGSP  
GDGVVRRG SGLTSPVPRHSIGSSTATLQVSPVRRSGGSRYASRDGADASAEFVHYTVHIPPTDRNTASASTDAPVAEE  
EGEVLPQRSYVSGTIFTGGLNCTTRAHVLSNSADGARPAASVNM SCKMRGCDMPAFLNAGRGRPPCDCGFMICEE  
CYMDCVAAAGNCPGCKEAYSAGSDTDDSVDEDDDDAISSEERDQMPMTSM SKRFSMVHSIKMPMPSSNGNGGG  
KPADFDHARWLFETKGT YGYGNALWPKNEHGGGNTAGATSGFV GIEPPNFGARCRRPLTRKTSV SQAILSPYRMLI  
AIRLVALGFFLAWRIRHPNDAMWLWALSVTCEVWF AFSWLLDSL PKLCPVNRSCDLVDLADR FELPTARNPKGRSDL  
PGIDV FVSTADPEKEPPLVTANTILSILAADYPVEKLACYLSDDGGALLT FEALAETASFARTWVPFCRKHGVEPRCPESYF  
GQKRDFLKNKVR LDFVRERRR KVKREYDEFKVRVNSL TEAIRRRSDAYNAGEELRARRRRLQEEAVAAGGALGAAPLAETG  
AVKGTWMSDGSQWP GTWLTGATDHARGDHAGIIQAMLAPPTSEPV LGGVPAESGALIDTTGVDIRL PMLVYSREK  
RPGYDHNKKAGAMN ALVRTSAIMSNGPFILNDCDHVYHNSAALREGMCYMLDRGGDRVCYVQFPQRFEGIDPNDR  
YANHNLVFFDVAMRAMDGLQGPMYVGTGCIFRRTALYGFSPPRATEHHGWLGRKKIKLFLRKPTTGKKT DRESEHES  
MLPPIEDDDHNQLGDI ESSALMPKRFGSSATFVSSIPVAEYQGRLLQDMPGVHQGRPAGALAVPREPLDAATVGEAIS  
VISC FYEEKTEWGRRIGWYGSVTEDEVVTGYRMHNRGWRSVYCVTRRDAFRGTAPINLTDRLHQVLRWATGSVEIFFS  
RNNALFATRRMKLLQRVAYFNVGMASRR

>CSLD\_7BL\_TGACv1\_577301\_AA1871610.1\_Triticum\_aestivumMASDHTNYTVFMPPTPDNQP GAAPAPASG  
GSTKPDNLPLPRYTS GSKLVNRRSGDDGAAGGAKMDRGLSTEHVASPSK SLLVRSQTGEFDHNRWLFETQGT YGIGNA  
YWPQDENDDGAGMGGGSVKMEDLVDPKWKPLSRKVAIPPGILSPYRLLV LVRVVALFLFLIWRATNPNDAMWLW  
GISIVCEYWFALS WLLDQMPKLN PINRAADLAALREKFESKTPSNPTGRSDLPGLDVFISTADPYKEPPLVTANTLLSILAT  
DYPVEKLFVYISDDGGALLT FEAMAEACAYAKVWVPFCRKH SIEPRNPEAYFTQKGDPTKGKRPDFVKDRRWIKREYD  
EYKVRINDLPEAIKRRAKAMNAHERKIARETAAASSDAAPPPVKATWMADGTHWPGTWLDSAPDHGKGDHASIVQV  
MIKNPHHDVVYGEADDHAYLDFTNVDVRIPMFVYLSREKRPGYDHNKKAGAMNAMVRASAVLSNGPFMLNFDCDH  
YVYNCQAIREAMCYMLDRGGDRICYIQFPQRFEGIDPSDRYANHNTVFFDGNMRALDGLQGPMYVGTGCLFRRYAIY  
GFNPPRAVEYHGLVGQTRVPIDPHARSGDGVAD ELRPLSDHPDHEAPQRFGKSKMFIESIAVAEYQGRPLADHPSVRN  
GRPAGALLMPRPPLDAATVAEAVS VISCWYEDNTEWGLRVGWIYGSVTEDEVVTGYRMHNRGWRSVY CITKRDAFRG  
TAPINLTDRLHQVLRWATGSVEIFFSKNNAMLASRRLMFLQRMSYINVGIYPFTSLFLIMYCLLPALS LFSGQFIVATLDPT  
FLCYLLITVTLVLLCLLEV KWSGIGLEEWWRNEQFWVIGG TSAHLAAVLQGLLKVAAGIEISFTLTA KAAAEDDDDPFAE  
LYLIKWTS LFIPPLAIIGINI IAMVVGVSR CVYAEIPQYSKLLGGGFFSWVLAHYYPFAKGLMGRRGRTPTIVYVWAGLISI  
TVSLLWITISPPDDRVSQSGIEV

>CSLD\_7AL\_TGACv1\_559436\_AA1799630.1\_Triticum\_aestivumMASDHTNYTVFMPPTPDNQP GAASAPASG  
GPTKPDNLPLPRSSGSKLVNRRSGDDGAAGGGKMDRRLSPVQVASPSK SLLVRSQTGEFDHNRWLFETQGT YGIGNA  
YWPQEDND DGAGMGGGSVKMEDLVDPKWKPLSRKVAIPPGILSPYRLLV LVRVVALFLFLVWRATNPNDAMWLW  
GISIVCEYWFALS WLLDQMPKLN PINRAADLAALREKFESKTPSNPTGRSDLPGLDVFISTADPYKEPPLVTANTLLSILAT  
DYPVEKLFVYISDDGGALLT FEAMAEACAYAKVWVPFCRKH SIEPRNPEAYFTQKGDPTKGKRPDFVKDRRWIKREYD  
EYKVRINDLPEAIKRRAKAMNAHERKIARETAAASSDAAPPPVKATWMADGTHWPGTWLDSAPDHGKGDHASIVQV  
MIKNPHHDVVYGDADDHAYLDFTNVDVRIPMFVYLSREKRPGYDHNKKAGAMNAMVRASAVLSNGPFMLNFDCDH  
YVYNCQAIREAMCYMLDRGGDRICYIQFPQRFEGIDPSDRYANHNTVFFDGNMRALDGLQGPMYVGTGCLFRRYAIY  
GFNPPRAVEYHGLVGQTRVPIDPNARSGDGVAD ELRPLSDHPDHEAPQRFGKSKMFIESIAVAEYQGRPLADHPSVRN

GRPPGALLMPRPPLDAATVAEAVSVISCWYEDNTEWGLRVGWYIGSVTEDVVTGYRMHNRGWRSVYCITKRDAFRG  
TAPINLTDRLHQVLRWATGSVEIFFSKNNALLASRRLMFLQRMSYINVGIYPFTSLFLIMYCLLPALSLSFGQFIVATLDPTF  
LCYLLITITLVLLCCLLEVKWSGIGLEEWWRNEQFWVIGGSAHLAAVLQGLLKVAAGIEISFTLTAKAAAEDDDDPFAEL  
YLIKWTSLFIPPLAIIGINIIMVVGVSRCVYAEIPQYSKLLGGGFFSFVWLAHYYPFAKGLMGRRGRTPPTIVYVWAGLISIT  
VSLLWITISPPDDRVSQSGIEV

>CSLD\_7DL\_TGACv1\_603510\_AA1985050.1\_Triticum\_aestivumMASDHTNYTVFMPPTPDNQPAAPTPASG  
GSTKPENLPLPRYTSKSLVNRSGDDGAAGGAKMDRWLSTEQVASPSKLLVRSQTGEFDHNRWLFETQGTYGIGN  
AYWPQDDNDGAGMGGGSVKMEDLVDPKPKPLSRKVAIPPGLSPYRLLVLVRFVALFLFLVWRATNPNDAMWL  
WGISIVCEYWFALSLLDQMPKLNPNRAADLAALREKFESKTPSNPTGRSDLPGLDVFISTADPYKEPPLVTANTLLSIL  
ATDYPVEKLFVYISDDGGALLTFEAMAEACAYAKVWVPFCRKHSIEPRNPEAYFTQKGDPTKGGKRPDFVKDRRWIKRE  
YDEYKVRINDLPEAIKRRAKAMNAHERKIARETAAASSDAAPPPVKATWMADGTHWPGTWLDSAPDHGKGDHASII  
QVMIKNPHHDVVYGDADDHAYLDFTNVDVRIPMFVYLSREKRPGYDHNNKAGAMNAMVRASAVLSNGPFMLNFDC  
DHVYVNCQAIREAMCYMLDRGGDRICYIQFPQRFEGIDPSDRYANHNTVFFDGNMRALDGLQGPMYVGTGCLFRRY  
AIYGFNPPRAVEYHGLVGQTRVPIDPHARSGDGIADLRPLSDHPDHEAPQRFGKSKMFIESIAVAEYQGRPLADHPSV  
RNGRPAGALLMPRPPLDAATVAEAVSVISCWYEDNTEWGLRVGWYIGSVTEDVVTGYRMQNRGWRSVYCITKRDAF  
RGTAPINLTDRLHQVLRWATGSVEIFFSKNNAMLASRRLMFLQRMSYINVGIYPFTSLFLIMYCLLPALSLSFGQFIVATL  
DPTFLCYLLITVTLVLLCCLLEVKWSGIGLEEWWRNEQFWVIGGSAHLAAVLQGLLKVAAGIEISFTLTAKAAAEDDDDP  
FAELYLIKWTSLFIPPLAIIGINIIMVVGVSRCVYAEIPQYSKLLGGGFFSFVWLAHYYPFAKGLMGRRGRTPPTIVYVWAG  
LISITVSLWITISPPDDRVSQSGIEV

>CSLE\_6DL\_TGACv1\_526558\_AA1687090.1\_Triticum\_aestivumMAGSSVSGGGGRPPLFATEKPKRVLAYRLY  
AGTIFAGILLIWFYRATHIPARGSSSLGWRAGLGLLVAELWFLYVWVTLVSRWNPVRRATFKDRLSERYDDDQLPGVD  
IFVCTADPALEPPMLVISTVLSVMAYDYPPEKLNILSDDAGSAVTFYALHEASEFAKHWPFCCKNYKVEPRSPAAYFAKG  
ATPHDACSPQEFRLMKELYKDLTDRMNSVHSGKIPEVPECNHRGFSEWNETITSGDHPSVQILIDRNKRKAVDVDG  
NALPKLVYMAREKRPQEQHHFKAGSLNALIRVSSVISNSPVILNVDCDMYSNNSSESIRDALCFFLDEEQGDIGFVQYP  
QNFNDNVVHNSYGNPINVVELDNPCLDGGWGGMCYGTGCFHRRETLSGQIYSKDYKEDWARGVGAENADELEET  
SKSLVTCTYEHNTPWGIEKGVRYGCPLEDVITGLQIQCHGWRSVYYNPARKGFLGKAPTSLGQILVQHKRWSEGLQM  
SLSNYSFPFLGHGKIKLGLQMGYSVCGFWALNSFPTFYVYIIPSLCFLSGVSVFPEITSPWCIPFIYVVVASYSWSLMESLQ  
CGDTAVEWWNAQRMWLMRRTTSYLLAAIDTIGGMLGVSESGFELTVKVDQALERYKKGKMEFGPISGMFVIITIA  
LFNLVCLVLGLGRVLLRGAEGPLFLQAVLCVAIVVINAPVYEALFIRRDGSLPYFVTLVSLCFVSSLCLQAI

>CSLE\_6AL\_TGACv1\_471004\_AA1500600.1\_Triticum\_aestivumMAGSSVSGGGGRPPLFATEKPKRVLAYRVYA  
GTIFAGILLIWFYRATHIPARGSSSLGWRAGLGLLVAELWFLYVWVTLVSRWNPVRRATFKDRLSERYDDDQLPGVDIFV  
CTADPALEPPMLVISTVLSVMAYDYPPEKLNILSDDAGSAVTFYALHEASEFAKHWPFCCKNYKVEPRSPAAYFAEGAT  
PHDACSPQELRLMKELYKDLTDRVNSVHSGKIPEVPECNHRGSSEWNEMITSGDHPSVQILIDRNKRKAVDVDGNA  
LPKLVYMSREKRPQEQHHFKAGSLNALIRVSSVISNSPVILNVDCDMYSNNSSESIRDALCFFLDEEQGDIGFVQYPQNF  
DNVNHNDIYGNPINVVELDNPCLDGGWGGMCYGTGCFHRRETLSGQIYSKDYKEDWDRGVGAENADELEETSLSL  
VTCTYEHNTPWGIEKGVRYGCPLEDVITGLQIQCRGWRSVYYNPARKGFLGMAPTSLGQILVQHKRWSEGLQISLSNY  
SPFLLGHGKIKLGLQMGYSVCGFWALNSFPTFYVYIIPSLCFLSGVSVFPEITSPWCIPFIYVVVASYSWSLMESLQCGDTA  
VEWWNAQRMWLMRRTTSYLLAAIDTIGGMLGVSESGFELTVKVDQALERYKKGKMEFGPISGMFVIITIALFNLV  
CLVGLGRALLREGTAGLGPLFLQAVLCVAIVVINAPVYEALFIRRDGSLPYFVTLVSLCFVSSLCLQAI

>CSLE\_6BL\_TGACv1\_499967\_AA1596110.2\_Triticum\_aestivumMAGSSVSGGRRPPLFATEKPKRVLAYRLYAG  
TIFAGILLIWFYRATHIPERGDSSLGWRAGLGLLVAELLFGLYWVLTLSVRWNPVRRRTTFKDRLSERYDDDQLPGVDIFVC  
TADPALEPPMLVISTVLSVMAYDYPPEKLNILSDDAGSAVTFYALHEASEFAKHWPFCNKYKVEPMSPAAYFAEGATP  
HDACSPQELLRMKELYKDLTDRVNSVHSGKIPEVPECNHRGFSVWNETITSGDHPSIVQILIDRNKRKAVDVDGNALP  
KLVYMAREKRPQEQHHFKAGSLNALIRVSSVISSPVILNVDCDMYSNNSIESIRDALCFFLDEEQGDIGFVQYPQNF  
NVVHNDIYGNPINVVNELDNTCLDGGWGMICYGTGCFHRRETLGQIYSKDYKEDWARGVGAENADELEETSLSLV  
TCTYEHNTPWGIEKGVRYGCPLEDVITGLQIQCRGWRSVYYPARKGFLGMAPTSLGQILVQHKRWSEGLFQISLSNYS  
PFLGHGKIKLGLQMGYSVCGFWALNSFPTFYVVIIPSLCFLSGVSVFPEITSPWCIPFIYVVAASYSWSLMEQLCGDTA  
VEWWNAQRMWLMRRRTSYLLAAIDTIGGMLGVSESGFELTVKVDESQALERYKKGKMEFGPISGMFVIITIALFNLV  
CLVLGLGRVVLREGAAGLGPLFLQAVLCVAIVVINAPVYEALFIRRDGSLPYFVTLVSLCFVSSLCCLQAI

>CSLE\_U\_TGACv1\_683314\_AA2158770.1

peptideMQIRVSSVISNSPIIMNVDCDMYSNNDAVRDALCFFLDEEMGHKIGFVQYPQNYNNLSKNDIYGNLSHVIN  
EVEMGGMDSLGGPLYIGTGCFHRREILCGRKFTKDYQEDWNAGIKDKLQESIDETEEKAKSLAACTYEHGTQWGDEIG  
VKYGCAVEDVITGLAIHCRGWESVYNNPKKPAFMGVGPTTLAQTLQHKRWSEGNSIFLSKYNVFLFGHGKTKLRHQ  
MGYHIYGLWAPNSLATLYYVIIPSLALLKGTPLFPEITSPWIAPFVYVFCVKNMYSLEYEALSSGDTLKGWWNGQRMWL  
KRITSYLFVLDNLRKLLGLSKMNFVSPKVSDEDESKRYEQEIMEFGSSDPEYVVIIGTITLLNLVCLLGGLSKVMKVGWN  
NIHLDALFPQLILCGMVVITSIPFYEAMFLRKDKGRIPFPVTLASIGFVMLALLPAIV

>CSLE\_5DL\_TGACv1\_433536\_AA1415840.1\_Triticum\_aestivumMVAIGRRTGQQHGHWRLLAAESPYPYLGPRD  
GEEHEAVRDGDSRPGGVQAPRRRHGRRILLLYRATRVPAAAGEGRAAWLGMLAAELWYAAAYWVVTQSVRWSPV  
RRRPFIDRLAARHGETLPCVDIFVCTADPYSEPPSLVSTILSLMAYNYPPEKLSVYLSDDGGSILTIFYGMWEASLFAKH  
LPFCKRYNIEPRSPAAYFSESDGHQELCNPKESLIKDMFDKMTERIDTVMSGKVPEEIKASHKGFYEWNQEITSKNH  
QPIVQILIDSKDQNAVDNEGKVLPTLVYMAREKRPQHNNFKAGAMNALIRVSSVISNSPIIMNVDCDMYSNNDAV  
RDALCFFLDEEMGHKIGFVQYPQNYNNLSKNNIYGNLSHVINEVEMGGMDSLGGPMYIGTGCFHRREILCGRKFTEDY  
QEDWNAGIKDKLQESIDETEEKAKSLAACTYEHGTQWADEIGVKYGCVEDVNTGLAIHCRGWDSVYNNPKRPAFM  
GVGPTTLAQTLQHKRWSEGIFISIFLSKYNVFLFAHGKTKLRHQMGYHIYGLWAPNSLATLYYVIIPSLALLKGTSLFPEITS  
PWIAPFVYVFCVKNMYSLEYEALLSGDTLKGWWNGQRMWLKRVKITSYLFVLDNLRKLLGLSKINFPVTPKVSDEDESK  
RYEQEIMEFGSSDPEYVIAAIALNLVCLMGGLSKVMKGGWNVHLDALFPQLILCGMLVITSIPFYEAMFLRKDKGRIPF  
PVTLASIGFVMLALLAKIV

>CSLE\_5BL\_TGACv1\_406235\_AA1342610.1\_Triticum\_aestivumMERSRRLFETETHGGRAAYRLHAVTVAAGIL  
LVLYRATHVPAAGEGRATWLGMLAAELWYAAAYWVVTQSVRWSPVRRRPFIDRLAARHGERLPCVDIFVCTADPYSE  
PPSLVSTILSLMAYNYPPEKLSVYLSDDGGSILTLYGMWEASLFAKHWPFCRYNIEPRSPAAYFSESDGHQELCTPKE  
WSLIKDMFDKMTERIDTAVMSGKVPEEIKARHKGfyewNQEISSKNHQPIVQILIDGKDQNAVDNEGKVLPTLVYMA  
REKRPQHNNFKAGAMNALIRVSSVISNSPIIMNVDCDMYSNNDAVRDALCFFLDEEMGHKIGFVQYPQNYNNLSK  
NNIYGNLSHVINEVEMGGMDSLGGPMYIGTGCFHRREILCGRKFTEDYQEDWNAGIKDKLQESIDETEEKAKSLAACTY  
EHGTQWGDEIGVKYGCVEDVNTGFAIHCRGWESVYNNPKKPAFMGVGPTTLAQTLQHKRWSEGIFISIFLSKYNVFL  
FAHGKTKLQHQMGYHIYGLWAPNSLATLYYVIIPSLALLKGTSLFPEITSPWIAPFVYVFCVKNMYSLEYEALSSGDTLKG  
WNGQRMWLKRVKITSYLFVLDNLRKLLGLSKMNFVTPKVSDEDESKRYEQEIMEFGSSDPEYVVIIGTITLLNLVCLLGG  
LSKVMKGGWNEHLDALFPQLILCGMVVITSIPFYEAMFLRKDKGRIPFPVTLASIGFVMLALLATIV



>CSLE\_5AL\_TGACv1\_376126\_AA1232370.2\_Triticum\_aestivumMERTRLFETETHGGRAAYRLHAVTVAAGILL  
LLYYRATRVPAAEGRAAWLGMLAAELWYAAYWVVTQSVRWSPVRRRPFDRDLAARHGERLPSVDIFVCTADPYSEP  
PSLVVSTILSLMAYNYPPEKLSVYLSDDGGSILTYYGMWEASLFAKHWPFCRKRYNIEPRSPAAYFSQSDGHQELCTPKE  
WSLIKDMFDEMTERIDTAVMSGKVPEEIKARQKGFHEWVQEQITSKNHQPIVQILIDGKDQNAVDNEGNVLPVLYMA  
REKRPQHNNFKAGAMNALIRVSSVISNSPIIMNVDCDMYSNNDAVRDALCFFLDEEMGHKIGFVQYPQNYNNLSK  
NDIYGNLQVINEVEMAGMDSLGGPLYIGTGCFHRREILCGRKFTKDYQEDWNAGIKDKLQESIDETEEKAKSLAACTYE  
HGTQWGDEIGVKYGCAVEDVITGLAIHCRGWESVYNNPKPAFMGVGPTTLAQTILQHKRWSEGNLSIFLSKYNVFLF  
GHGKTKLRHQMGYHIYGLWAPNSLATLYYVIPSALLKGTPLFPEITSPWIAPFVYVFCVKNMYSLYEALSSGDTLKGW  
WNGQRMWLVKRITSYLFVLDNLWKLGLSKMNFVSPKVSDEDESKRYEQEIMEFGSSDPEYVVIIGTITLLNLVCLLG  
GLSKVMKVGWNNIHLDALFPQLILCGMVVITSIPFYEAMFLRKDKGRIPFPVTLASIGFVMLALLPAIV

>CSLE\_5DL\_TGACv1\_433536\_AA1415830.1\_Triticum\_aestivumMERTRRLFETETHGGRAAYRLHAVTVAAGIL  
LLYYRATHVPAAGEGRAAWLGMLAAELWYAAYWAVTQSVRWSPVRRPLPFIDRLAARYGERLPCVDIFVCTADPHSE  
PPSLVISTVLSLMAYNYPAEKISVYLSDDGGSVLTFYALWEASLFAKHWPFCRKRYNIEPRSPAAYFSESDGHQDLCSPKE  
WSLIREMYEDMTERIDTAVLSGKISEEVKANHKGFHEWDQENTSKNHQPIVQILIEGKDKNANDDEGNVLPVLYMAR  
EKRPQHNNFKAGAMNALIRVSSVISNSPIIMNVDCDMYSNNCDTIRDALCFFLDEEMGHKIGFVQFPQNYNNLTKN  
NIYGNSHQVTNQLMGGMDSVGGPMYVGTGCFHRREILCGRFTEDYKEDWNGGKDKTQESIVEIEEKAKSLAASTY  
EHDTQWGDEIGIKYGPAEDIVTGLGIHCRGWKSVHSNPPRPAFLGVAPTTLAQTLLQHKRWSEGSFISFLSKYCPFMF  
GHGKIKLRHQMGYSIYGLWAPNSIPTLYYVIPSALLKGISLFEITSPWMSPFYVLCVKNMYSLYEALSCGDTLKGWW  
NEQRMWVRRITSYLYGLTDTVRKLLGLSKMTFAVTSKVSESESKRYEQEIMEFGSSAPEYVIIATVALLNLNCLVGL  
CQIMTGGWNILLNVFSPQLILCGMLVITNIPFYEAMFVRKDKGRIPFSVTLASIGFAILALLVPIV

>CSLE\_5BL\_TGACv1\_406235\_AA1342600.1\_Triticum\_aestivumMERSRRLFETETHGGRAAYRLHAVTVAAGIL  
LLYYRATRVPAAEGRAAWLGMLAAELCYAAYWVVTQSVRWSPLHRRPCRDLAARYGERLPCVDIFVCTADPHSE  
PPSLVISTVLSLMAYNYPAEKISVYLSDDGGSILTFYALWEASLFAKHWPFCRKRYNIEPRSPATYFSESDGHQDMCTPKE  
WSLIREMYEDMTERIDTAALSGKISEEVKENHKGFHEWDQENTSKNHQPIVQILIEGKDKNANDDEGNVLPVLYMAR  
EKRPQHNNFKAGAMNALIRVSSVISNSPIIMNVDCDMYSNNYDTIRDALCFFLDEEMGHKIGFVQFPQNYNNLTKN  
NIYGNSHQVTNQLMGGMDSVGGPMYVGTGCFHRREILCGRFTKDYKEDWDGGKDKTQESIDEIEEKAKSLAAST  
YEHTQWGDEIGIKYGPAEDIVTGLEIHCGRGWKSVHSNPPRPAFLGVAPTTLAQTLLQHKRWSEGSFISFLSKYCPFMF  
GHGKIKLRHQMGYSIYGLWAPNSIPTLYYVIPSALLKGISLFEITSPWISPFYVVCVKNMYSLYEALSCGDTLKGWWN  
EQRMWVRRITSYLYGLTDTVRKLLGLSKMTFAVTSKVSEENESKRYEQEIMEFGSSAPEYVIIATVALLNLICLVGGLSQ  
ILTGGWNILLNVFSPQLILCGMLVITNIPFYEAMFVRKDKGRMPFSVTLASISFAMLALLVPIVNSRYI

>CSLE\_6DS\_TGACv1\_543277\_AA1737920.1\_Triticum\_aestivumMERRLFETVRHGGRALYRLHAVTVAASTLLV  
LYYRATRVPGSGRRRAAWLGMLAAELWYAAYWVVTQSVRWSPVRRCTFRDRLTARYGDRLPGVDIFVCTADPLSEPP  
SLVISTILSVMAYNYLAEKLSVYLSDDGGSVLTFYAMWEASLFAKHWPFCRKRYNIEPRSPAAYFSESYQDLCTPKEWSFI  
KDMYDEMTERIDTAVISRKIPEEIRSNHKGFYEWVQEQITSKNHQPIVQVLDGKDQKGVDSSEGNVLPVLYMAREKRPQ  
HHNNFKAGAMNALIRVSSVISNSPIMNVDCDMYSNNNDTIRDALCFFLDEEMGHKIGFVQYPQNYNNMTKNNLYG  
NSLHVINEVEMGGMDSLGGPLYVGTGCFHRREILRGRFTKDYQEDWNGGKIGRIQDTSIGEIEEKAKSLATCTYEHDT  
QWGDEIGLKYGCPVEDVITGLAIHCRGWESVSNPTRPAFMGLGPTTLAQTLLQHKRWSEGSFISFLSKYCPFLFGHGK  
TNLRHQMGYCIYGLWAPNSLPTLYYVIPSALLKGIPLPKITSPWIAPIYAFVKNMYSLYEALSCGDTLKGWWNGQ  
RMWLVKRITSFLGAIDTVRKLGLSKMTFVVTPKVSIEDESKRYEEEEIMEFGSSSTPEYVIIATIALNLVCLLGGLSQIMTG  
AWNHLDAFSPQLILCGMLVITNMPFYEAMFLRNDKGIKIPFTVTLASFGFVMLDFLPIV

>CSLF\_2DL\_TGACv1\_159781\_AA0542640.1\_Triticum\_aestivumMAAAVTRRVNLRVEVPDGNADTANAPAA  
KRILDAKDDVWVSADDGTSAGNGNQPLLFRTMKVKGSILHPYRFLILVRLVAVAFAFFAWRLEHRNHDGTWLWATSM  
VADAWFGFSWLLNQLTKLNPIKRVPLDLADLQHGAILPGIDVFVTTADPVDEPVLTYVNTVLSILAADYPIDKYACYLS  
DDGGTLVHYEAMTQVASFAALWAPFCRKHCVPRSPENYFGMKAQPYAGSMPGDFTRDRRRRVRREYDEFMVRIDSL  
STTIRQRSDAYNNGDGVHATRMADGAPWPGTWIEQAENHRRQAQHAGIVQVILEHPGCKPQLGSSASTDNPFDN  
VDMRLPMLVYISREKRLGYDNQKKAGAMNAMLRLISALLSNAPFIINFDCDHYINNSKALRAPMCFMLDPRDGQNTAF  
VQFPQRFDDVDPTDRYANHNRFVFDGTMLALNGLQGSPYLTGTGMFRRVTLYGMEPPRYRVENIKLVDNAHEFGNS  
TSFTNSMPDGAIQERSITPVLVDEGLINDLATLITCAYEDGSSWGRDIGWVYNIATEDVVTGFRIHRQGWRSMYCSME  
PAAFRGTAPINLTERLYQVLRWSSGGSLEVFFSHNNALIAGRRLHPLQRIAYFNMSTYPIVTVFILAYNFFPVMWLFSEQLY  
IQRPFGTIAYLVAVIAMMHVIGMFEVKWAGITLLDWCRNEQFYLIAATGVYPTAVLYMALKLVTGKGMHFRLLTSKQT  
EACSRDKFANLYTVRWVPLLIPTTAVLVVNVAAVGAAGKAAAWGFSTQARHVLLGMVFNVTGLMLLYPFALGIMG  
KRGKTPVILFVLLLMAIAAVGLLYVTLYAPYPQESLTFLSW

>CSLF\_7BL\_TGACv1\_580651\_AA1914920.1\_Triticum\_aestivumMATDTVADAAEGRRARDVWVAEEEGDM  
PEASAGRPLLFRMTMKVKGSILHPYRFLILVRLVAIVAFFAWRVEHRNHDGVWLWATSMVADAWFGFSWLLNQLKLN  
PIKRVPLDALADRHGAEVLPIDVFVTTVDPVDEPVMYTVNTILSILAADYPVDKYACYLSDDGGTLVHYEAMLQVAS  
FAALWVPFCRKHCVPRSPENYFGMKTRPYVGGMAGEFMSDHRRVRREYGEFKVRIDSLSTTIRRRSDAYNKGDDDV  
HATWMADGTQWPGTWIEQADNHRRGQHAGIVKVMLDHPCKPQLGSSASTNKPVDLSNVDTLRLPMLVYISREKRP  
GYDNQKKAGAMNMLRVSALLSNAPFVINFDCDHYINNSQALRAPMCFMLDPRDGQNTAFVQFPQRFDDVDPTDR  
YSNHNRFVFDGTMLSLNGLQGPTYLTGTGMFHRVALYGMEPQRYRAENIKLVGKGAELGKSTPFLNSIPDGAIQDRSIT  
PVSVDEGLMSDLATLMTCAVEDRTSWGRDVGWVYNIATEDVVTGFRIHRQGWRSMYCSMEPAAFRGTAPINLTERL  
YQVLGGQAAPSRCSPTATLSSPAVGSTLYSASLTSTCRSTRSPRCS

>CSLF\_7AL\_TGACv1\_557532\_AA1782680.1\_Triticum\_aestivumMPLRVEALVATDTASAAAAEGRRAKDDVW  
VAEEGDMMSGASAGRPLLFRMTMKVKGSILHPYRFLILVRLVAIVAFFAWRVEHRNHDGTWLWATSMVADAWFGFSW  
LNQLPKLNPIKRVPLDLVALADRHGAEVLPIDVFVTTVDPVDEPVLTYVNTILSILAADYPVDKYACYLSDDGGTLVHYE  
MLQVASFAALWVPFCRKHCVPRSPENYFGMKTRPYVGGMAGEFMSDHRRVRREYGEFKVRIDSLSTTIRRRSDAYN  
KGDDGVHATWMADGTQWAGTWIEQADNHRRGHHAGIVQVMLDHPCKPQLGSSVSTNSPIDLSNVDTLRLPMLVYI  
SREKHPGYDNQKKAGAMNMLRVSALLSNAPFVINFDCDHYINNSRALRAPMCFMLDPRDGQNTAFVQFPQRFDN  
VDPTDRYSNHNRFVFDGTMLSLNGLQGPTYLTGTGMFRRVALYGMPPRYKAENIKLVGKAAELGNSTPFLKSIPDGA  
QERSITPVLVDEALTSIDLATLMTCAVEDRTSWGRDVGWVYNIATEDVVTGFRIHRQGWRSMYCSMEPAAFRGTAPIN  
LTERLYQVLRWSSGGSLEAFFSHSNALIASRRLHPLQRIAYLNMSIPIATMFILAYSFFPVMWLFSEESYYIQRPFGT  
FIMYLVAVIAMMHVIGMFEVKWAGITLQDWRNEQFYMITATGVYPTAVLYMALKLIRGKIYFRLTSKQTEACSGEKFAD  
LYTVRWVPLLIPTVAVLVVNVIAAIGAAIGKAATWGFFTDQAWHAVLGMVFNVTGLVLLYPFALGIMGQWGKRP  
GILLV MLVMAIGTVGLLYVTLQQDGHMSFLTRPSG

>CSLF\_7DL\_TGACv1\_602590\_AA1961740.1\_Triticum\_aestivumMALRVEALVATDTAAAEGRRAKDDVWVA  
EEGDMMSGASAGRPLLFRMTMKVKGSILHPYRFLILVRLVAIAFFAWRVEHRNHDGMWLWATSMVADAWFGFSWLLN  
QLPKLNPIKRVPLDALADLHGAEVLPIDVFVTTVDPVDEPVMYTVNTILSILAADYPVDKYACYLSDDGGSLVHYEAM  
IQIVHFAALWVPFCRKHCVPRSPENYFGMKTRPYVGGMAGEFMSDHRRVRREYGEFKVIIDSLSTTIRRRSDAYNKRD  
DGVHATWMADGTQWAGTWIEQADNHRRGQHAGIVQVMLDHPCKPQLGSSARTNPIDLSNVDTLRLPMLVYISR  
EKHPGYDNQKKAGAMNMLRVSALLSNAPFVINFDCDHYINNSQALRAPMCFMLDPRDGQNTAFVQFPQRFDDVD  
PTDRYSNHNRFVFDGTMLSLNGLQGPTYLTGTGMFRRVALYGMPPRYRAENIKLVGKAAELGNSTPFLNSIPDGAIQE

RSITPVLVDEGLSNDIATLMTCTYEDGSSWGRDVGWVYNIATEDVVTGFRIHRQGWRSMYCSMEPAAFRGTAPINLTERLYQVLRWSSGGSEVFFSHSNALIASRRLNPLQRIAYLNMSIYPIATMFI LAYSFFPVMWVLFSEQSYIQRPFGTFFIMYLVVVIAMMHVIGMFEVKWAGITLQDWWRNEQFYMIAATGVYPTAVLYMALKLIRGKGIYFRLTSKQTEACSDKFA DLYTVRWVPLLIPTVAVLIVNVTAVGAAIGKAATWGFFTDQAWHAVLGMVFNVTGLVLLYPFALGIMGQW GKRPGILLVMLVMAIGTVGLLYVTLQQDGHMSFLTRPSG

>CSLF\_2AL\_TGACv1\_094713\_AA0301960.1\_Triticum\_aestivumMMAAAVTRRSNALRVDVDPGD AVAVSVVADSPVAKRGLGAKEDVWVAVDEGGMSGDGNRPLLFRMTMKVKGSILHPYRFLMLMRLVAVVIFFKWRMEHKNH DGVWLWTVSMTADVWFGFSWLLNQLPKLNPIKRVPDLAALADRHDDATLPGIDVFVTTVDPVDEPVLTYVNTILSILA ADYPVDNYACYLSDDGGTLVHYEAMVQVASFALWVPFCRKHCVESRSPESYFGIKTHSYAGGMAGEFMRDRRRVRREYE EFKVRIDSLSTTIRQRSDAYNSKNKGGVSATWMADGTQWPGTWVEQAENHRRGQHAGIVQVLLDHPSCPEQLGSPA STDNPFDFSNVDTRLPMLVYISREKRPGYDNQKKAGAMNVMRLVSALLSNAPFVINFD CDHYINNSQALRAPMCFMLDPRDGGQNTAFVQFPQRFDDVDPTDRYANHN RVFFDGTMLALNGLQGPTYLGTGTMFRRVSLYGI EPPRYRAENTKLV RKAGEFGYSTSFVNSVPDAAIQDRSITPVLVDEGLR KDLTTLMTCAYEDGSSWGRDAGWVYNIATEDVVTGFRIHRQGWRSMYCSMEPAAFRGTAPINLTERLYQVLRWSSGGSEVFFSHSNALIASRRLHLLQRIAYLN MSTYPIVTVFILSYNFFPVMWVLFSEQLYIQRPFGTYMAYLVAIIAMVHLIGMFEVRWSGITLLDWFRNEQFYMIGATGVYPTAVLYMLLKLVTGKGIYFRLTSKQTEACSN DKFADLYTVRWVPLLIPTTAVIIVNVA AVGAAIGKAATWGFFTDEARHALLGMVFNMGILVLLYPFALGIMGKWGKRPIILFIVLVAISAVGLLYVMLHAPYTG EW SQVAVSLGKASLTGPSGSG

>CSLF\_2DL\_TGACv1\_160109\_AA0546890.1\_Triticum\_aestivumMAAAVTRRSNALRVDVPGGEAVAVSVAADSPVAKRGLGAKDDVWVAAD EGGIMSGDGNRPLLFRMTMKVKGSILHPYRFLMLVRLVAVVAFFKWHVEHKNQDSVWLWTASMTADPWFGFSWLLNQLPKLNPIKRVPD LADRHDATLPRIDVFVTTVDPVDEPVLTYVNTILSILAADYPIDNYACYISDDGGTLVHYEAMVQVASFALWVPFCRKHCVESRSPESYFGIKTRSYIGGMAGEFMRDHRRVRREYEEFKVRI DLSLSTTIRQRSDAYNSSNKGVSATWMADGTHWPGTWVEQAENHRRGQHAGIVQVLLDHPSCPKQLGSPASTDNPFDFSNIDTRLPMLVYISREKRPGYDNQKKAGAMNVMRLVSVLLSNAPFVINFD CDHYINNSQALRAPMCFMLDPHDGQNTAFVQFPQRFDDVDPTDRYANHN RVFFDGTMLALNGLQGPTYLGTGTMFRRVSLYGI EPPRYRAENTKLV RKTGEFGYSTSFVNSVPDAAIQDRSITPVLVDEHLR KDLATLMTCAYEDGSSWGRDAGWVYNIATEDVVTGFRIHRQGWRSMYCSMEPAAFRGTAPINLTERLYQVLRWSSGGSEVFFSHSNALIASRRLHPLQRIAYLN MSTHPIVTVFILSYNFFPVMWVLFSEQLYIQRPFGM YMGYLVAIIAMVHLIGMFEVRWSGITLLDWFRNEQFYMIGATGVYPTAVLYMLLKLATGKGIYFRLTSKQTEACSN DKFADLYTVRWVPLLIPTTAVIIVNVA AVGAAIGKAATWGFFTDEARHALLGMVFNMGILVLLYPFALGIMGKWAKRPIILFIVLVAISV VGLLYVSLHAPYTG EW SQVAVSLGKASLTGPSGSG

>CSLF\_2BL\_TGACv1\_130934\_AA0420130.1\_Triticum\_aestivumMVQVASFALWVLFPCRKHCVESRSPESYFGMKTRSYAGGMAGEFMRDHRRVRREYEEFKVRIDSLSTTIRQRSDAYNSNKGVSATWMADGTQWPGTWVEQAE NHRRGQHAGIVQVLLDHPSEFKPQLGSPASTDNPFDFSNVDTRLPMLVYISREKRPGYDNQKKAGAMNVMRLVSALLSNAPFVINFD CDHYINNSQALRAPMCFMLDPHDGQNTAFVQFPQRFDDVDPTDRYANHN RVFFDGTMLALNGLQGP TYLGTGTMFRRVALYGI EPPHYRAENTKL VCKTGEFGYSTSFINSVPDAAIQDRSITPVLVDERLSKDLATLMTCAYEDGSSWGRDAGWVYNIATEDVVTGFRIHRQGWHSMYCSMEPAAFRGTAPINLTERLYQVLRWSSGGSEVFFSHNNALIASRRLHPLQRITYLNMSTYPIVTVFILSYNFFPVMWVLFSEQLYIQRPFGTYMAYLVGIIAMVHLIGMFEVRWSGITLLDWFRNEQFYMIGATGVYPTAVLYMLLKLVTGKGIYFRLTSKQTEGCSN DKFADLYTVRWVPLLIPTTAVIIVNVA AVGAAIGKAATWGFFTDEARHALLGMVFNMGILVLLYPFALGIMGKWGKRPIILFIVLVAISV VGLLYVTLHAPYTG EW SQVAVSLGKASLTGPSGSG

>CSLF\_2DS\_TGACv1\_178985\_AA0603230.1\_Triticum\_aestivumMTTSPATDAGAATGLSEPLLSNRNGVHAGA  
LVVTPVAANGHGKAKDKYWKDQDQPGDMAVAPDLENGGGRPLLFSNRRVKNILYPYRVLILIRVIAVILFVGWRIKN  
NNSDVMWFWVISVADVWFSLWSLSYQLPKYNPIKMIPDLATLRKQFDTPGRSSQLPGIDVIVTTASATDEPILYTMN  
CVLSILAADYHIGRCNCYLSDDSGSLVLYEALVETAKFAALWVPFCRKHQIDPRAPESYFELEGPLCGGASHKEFIQDYKH  
VCTQYEEFKKHLDMLPNTIRQRADIYSKTGKDEDAKVTWMADGTQWPGTWLDPAEKHRAGHHAGIVKIVQSHPEH  
VVPLGVHESNDSSLNFDGVDMLPMLVYVAREKCPGVEHNKKAGALNAELRISALLSNAPFFINFDCDHYINNSEALHA  
AVCFMLDPREGDNTGFVQFPQRFDNVDPTDRYGNHNRVFFDGAMYGLNGQQGPTYLGTGCMFRRALYIGIDPPCW  
RAEDIIVDSNRFGNSLPFLNSVLAAIKQEEGVTLPPTLDDSFLEEMTKVSSSYDDSTDWGRGIGIYNMATEDIVTGFRI  
HGQGWRSMYATMEREAFRGTAPINLTERLRQIVRWSSGGSLEMFFSHISPLFAGRRLSLVQRLSYINFTIYPLTSLFILMYA  
FCPVMWLLPTEILVQRPYTRYIVYLIIVIMIHVIGMFEIMWAGITWLDWWRNEQFFMIGSVTAYPTAVLHMVNVNLT  
KGIHFRVTTKQPVADTDDKYAEMYEVHWVPMMPAVVVLFSNILAIGVAIGKSILYMGTSAAQKRHGALGLLNLWI  
MVLVLPFALAIIGRWAKRTGILFILLPIAFLSTSLMYIGVHTFLLHFFPSMLI

>CSLF\_2AS\_TGACv1\_112790\_AA0345230.1\_Triticum\_aestivumMTTSPATHDGAATGLSEPLLPNRNGVHAGA  
LVVTPVAVANGHGKAKDKYWKDQDQDVAAPDLENGGGRPLLFSNRRVKNILYPYRVLILIRVIAVILF  
VGWRIKHNSDVMWFWVMSVADVWFSLWSLSYQLPKYNPIKMIPDLATLRKQFDTPGRSSQLPGIDVIVTTASAT  
DEPILYTMNGVLSILAADYHIGRCNCYLSDDSGSLVLYEALVETAKFAALWVPFCRKHQIEPRAPESYFELEGLCGGASH  
KEFIQDYKHVRTQYDEFKKHLDMLPNTIRQRSDIYSRTGKDEDATVTWMADGTQWPGTWLDPTEKHRPGHHAGIV  
KIVQSHPEHVPLGVQESNDNPLNFDDVDMRLPMLVYVAREKSPGVEHNKKAGALNAELRISALLSNAPFFINFDCDH  
YINNSEALRAAICFMLDPREGDNTGFVQFPQRFDNVDPTDRYGNHNRVFFDGAMYGLNGQQGPTYLGTGCMFRRAL  
LYGIDPPCWRDEDIIVDSNRFGNSLLFLNSVLAAIKQEEGVTLPPLDDSFLEEVTKVSSSYDDSTDWGRGIGIYNMA  
TEDIVTGFRIHGQGWRSMYATMEREAFRGTAPINLTERLRQIVRWSSGGSLEMFFSHISPLFAGRRLSLVQRLSYINFTIY  
LTSFILMYAFCPVMWLLPTEILVQRPYTRYIVYLIIVIAMIHVIGMFEIMWAGITWLDWWRNEQFFMIGSVTAYPTAVL  
HMVNVNLTCKGIHFRVTTKQPVADTDDKYAEMYEVHWVPMMPAVVILFSNILAIGVAIGKSVLYMGTSAAQRRH  
GALGLLNLWIMVLVLPFALAIIGRWAKRTGILFILLPIAFLSTALMYIGIHTFLLHFFPSMLI

>CSLF\_2BS\_TGACv1\_148027\_AA0489970.1\_Triticum\_aestivumMTTSPATAAGAATGLSEPLLSNGNGVHAGA  
LVVTPVAVANGHGKAKDKYWKDQDQDVAAPDLENGGGRPLLFSNRRVKNILYPYRVLILIRVIAVILFV  
GWRIKHNSDVMWFWVMSVADVWFSLWSLSYQLPKYNPIKMIPDLATLRKQFDTPGSSSQLPGIDVIVTTASATDE  
PILYTMNCVLSILAADYHIGRCNCYLSDDSGSLVLYEALVETAKFAALWVPFCRKHQTEPRAPARYFELEGPLCGGASHKE  
FIQDYKHVRMQYEEFKKHLDMLPNTIRQRSDIYSKTGKDEDAKVTWMADGTQWPGTWVDPAEKHRAGHHAGIVKI  
VQSHPEHVPLGVQESNDNPLNFDDVDMRLPMLVYVAREKSPGVEHNKKAGALNAELRISALLSNAPFFINFDCDHYI  
NNEALRAAVCFMLDPREGDNTGFVQFPQRFDNVDPTDRYGNHNRVFFDGAMYGLNGQQGPTYLGTGCMFRRAL  
YGIDPPCWARAEDMIVDSNRFGNSLPFLNSVLAAIKQEEGVTLPPLDDSFLEEMTKVSSSYDDSTDWGRGIGIYNYM  
ATEDIVTGFRIHGQGWRSMYVTMEREAFRGTAPINLTERLRQIVRWSSGGSLEMFFSHISPLFAGRRLSLVQRLSYINFTIY  
PLTSLFILMYAFCPVMWLLPTEILIQRPYTRYIVYLIIVIAMIHVIGMFEIMWAGITWLDWWRNEQFFMIGSVTAYPTAV  
LHMVNVNLTCKGIHFRVTTKQPVADTDDKYAEMYEVHWVPMMPAVVVVLFNILAIGVAIGKSVLYMGTSAAQKR  
HGALGLLNLWIMVLVLPFALAIIGRWAKRTGILFILLPIAFLSTALMYIGIHTFLLHFFPSMLI

>CSLF\_2AS\_TGACv1\_113659\_AA0359050.1\_Triticum\_aestivumMASAAGAGGANAGLADPLLASAKKPVGAK  
GKHVVAADKQRRAAKESGGEDGRPLLFRYKVKGTLLHPYRALIFIRLIAVLLFFVWRIKHNSDVMWFWTMSVVG  
DVWFGFSWLLNQLPKFNPVKTIPTDMVALRRQYDLPDGTSTLPGIDVFVTTADPIDEPILYTMNCVLSILASDYPVDRCAC  
YLSDDSGALIQYEALVETAKFATLWVPFCRKHCIERAPESFFEQEAPLYTGSAPPEEFKNDHNSVYIEYDEFKECLDSLSSAI

SKRSDAYNSMKTEEGDANATWMANGTQWPGSWIDTTEIHRKGGHHAGIVKVVLDSIRGHNLSQASTHNLNFAST  
DVRLPMLVYISRGKNPSYDHNKKAGALNAQLRASALLSNAQFIINFDCDHYINNSQALRAAMCFMLDQRQGDSTAFV  
QFPQRFDNVDPDRYGNHNRVFFDGTMLALNGLQGPSYLTGCMFRRIALYIDPPEWRHANIVVDDKRFSSIPFLE  
SVSKAINQERSTIPPISETLVAEMERVVSASHDKATGWGKGVGYIYDIATEDIVTGFRIHGQGWRSMYCTMERDAFCG  
IAPINLTERLHQIVRWSSGGSLEMFFSLNPLIGGRRIQSLQRVSYLNMTVYPVTSLFILLYALSPVMWLIPDEVYIQRPFK  
YVVFLLVILMIHVIGWLEIKWAGVTWLDYWRNEQFFMIGSTSAYPAAVLHMVVNLLTKKGIHFRVTSKQTAADTNDK  
FADLYDMRWVPMLIPTTVLIANVGAIGVAMGKTIVYMGAWTIAQKTHAALGLLFNWVIMVLLYPFALAIMGRWAK  
RPVILLVLLPVAFTIVCLVYVAVHILLLSYLT

>CSLF\_2DS\_TGACv1\_177641\_AA0581710.2\_Triticum\_aestivumMASAAGAGGANAGLADPLLASAKKPVGAK  
GKHVVAADKDQRRAAKESGGEDGRPLLFRITYKVKGTLLHPYRALIFIRLIAVLLFFVWRIKHNSDIMWFWTSLVVGDV  
WFGFSWLLNQLPKFNPVKTIPTDMVALKRQYDLPDGTSTLPGIDVFVTTADPIDEPILYTMNCVLSILASDYPVDRACACYL  
SDDSGALIQYEALVETAKFATLWVPFCRKHCIEPRAPESYFELEAPLYTGSAPEDFKNDHSSVHREYDEFKEHLDSISSAIS  
KRSDAYNSMKTEEGDAKATWMANGTQWPGSWIDTTEIHRKGGHHAGIVKVVLGHSIRGHNLSQASTNNLNFASTD  
VRLPMLVYISRGKNPSYDHNKKAGALNAQLRASALLSNAQFIINFDCDHYINNSQALRAAMCFMLDQRQGDSTAFVQ  
FPQRFDNVDPDRYGNHNRVFFDGTMLALNGLQGPSYLTGCMFRRIALYIDPPEWRHDNIVVDDKRFSSIPFLES  
VSKAINQERSTIPPISETLVAEMERVVSASHDKATGWGKGVGYIYDIATEDIVTGFRIHGQGWRSMYCTMERDAFCGI  
APINLTERLHQIVRWSSGGSLEMFFSLNPLIGGRRIQALQRVSYLNMTVYPVTSLFILLYALSPVMWLIPDEVYIQRPFK  
YVVFLLVILMIHVIGWLEIKWAGVTWLDYWRNEQFFMIGSTSAYPAAVLHMVVNLLTKKGIHFRVTSKQTAADTNDK  
FADLYDMRWVPMLIPTTVLIANVGAIGVAMGKTIVYMGAWTIAQKTHAALGLLFNWVIMVLLYPFALAIMGRWAK  
RPVILLVLLPVAFTIVCLVYVAVHILLLSYLT

>CSLF\_2BS\_TGACv1\_148608\_AA0494060.1\_Triticum\_aestivumMASAVGAGGANAGLADPLLASRDGGAKKP  
VGAKGKHVVAADKDQRRAAKESGGEEGRPLLFRITYKVKGTLLHPYRALIFIRLIAVLLFFVWRIKHNSDIMWFWTMS  
VVGDVWFGFSWLLNQLPKFNPVKTIPTDMVALRRQYDLPDGTSTLPGIDVFVTTADPIDEPILYTMNCVLSILASDYPVD  
RCACYLSDDSGALIQYEALVETAKFATLWVPFCRKHCIEPRAPESYFELEAPLYTGSASEEFKNDHSSVHREYDEFKEHLDS  
LSSAISKRSDAYNSMKTEEGDAKATWMANGTQWPGSWIDTTEIHRKGGHHAGIVKVVLDSVIRGHNLSQASTHNLN  
FANTDVRLPMLVYISRGKNPSYDHNKKAGALNAQLRASALLSNAQFIINFDCDHYINNSQALRAAMCFMLDQRQGD  
TAFVQFPQRFDNVDPDRYGNHNRVFFDGTMLALNGLQGPSYLTGCMFRRIALYIDPPEWRHDNIVVDDKRFSS  
IPFLDSVSKAINQERSTIPPISETLVAEMERVVSASHDKATGWGKGVGYIYDIATEDIVTGFRIHGQGWRSMYCTMER  
DAFCGIAPINLTERLHQIVRWSSGGSLEMFFSLNPLIGGRRIQSLQRVSYLNMTVYPVTSLFILLYALSPVMWLIPDEVYI  
QRPFKYVVFLLVILMIHVIGWLEIKWAGVTWLDYWRNEQFFMIGSTSAYPAAVLHMVVNLLTKKGIHFRVTSKQTA  
DTNDKFADLYDMRWVPMLIPTTVLIANVGAIGVAMGKTIVYMGAWTIAQKTHAALGLLFNWVIMVLLYPFALAIM  
GRWAKRPVILLVLLPVAFTIVCLVYVAVHILLLSYLT

>CSLF\_U\_TGACv1\_641498\_AA2096480.1\_Triticum\_aestivumMPSPAAGGGRLADPLLAADVVGAKDKYWW  
PADEREILASQKSGAGEDGRAPLLYRTFRVKGPLINLYRLLTLVRVIVILFFTWRMRHRDSAMWLWWISVVDLWF  
GVTWLLNQITKLRPRKCVPSISVLRDHLDPDGGSDPLLDVFINTVDPVDEPMLYTMNSILSILATDYPVEKYATYFSDD  
GGSLVHYEGLQLAAEFAASWVPFCRKHCVEPRAPESYFWAKMRGEYAGSAPKEFLDDHRRMRAAYEEFKARLDGLSA  
AIEQRSEACNRANGKDKKECANATWMADGSTQWQGTWIKPAKGHRKGGHPAILQVMLDQPSKDPPELGMAASSDH  
PLDFSAVDARLPMVYIAREKRPYDHQKAGAMNVQLRVSALLSNAPFIINFDDGDHYVNSQAFRAAICFMLDPRDG  
ADTAFVQFPQRFDVDPTDRYCNHNRMFFDATLLGLNGIQGPSFVGTGCMFRRVALYSADPPRWRPDDAKEAKASR  
YRPNMFGKSTSFINSMPAAANQERSVSPATVGEAELADAMTCAVEDGTEWGNVGVVYNIATEDVVTGFRHLRTG

WRSTYCAMEPDAFRGTAPINLTERLYQILRWSSGGSLEMFFSRFCPLLAGRRLHPMQRVAYINMTTYPVSTFFICMYLY  
PVMWLFQGEFYIQRPFQTFALFVVVVIATVELIGMVEIRWAGLTLDDWVRNEQFYIIGTTGVYPMAMLHILLRSLGKGV  
SFKLTAKKLTGGARERLAELYDVQWVPLLVPVVVMAVNVAIGAAGKAIVGRWSAAQVAGAASGLVFNVMMLL  
LYPFALGIMGRWSKRPYILFIVLVTAVAATASMYVALAGSLPYLHSGIKLV

>CSLF\_2BS\_TGACv1\_146146\_AA0456710.1\_Triticum\_aestivumMAAAVTRRANALRVEAPDGNTEGRASLAA  
DSPVAKRAVDAKDDVWVAADDEGEASGSIAGDGNRTPLFRFTKVKGSILHPYRFMILVRLVAIVAFFAWRVKHKHNDGV  
WLWATSMVADVWFGFSWLLNQLPKLNPKRVPDLAALADHSGDANLPGIDIFVTTVPVDEPLLYTVNTILSILATDY  
PVDKYACYLSDDGGTLVHYEAMIEVANFAVLWVVPFCRKYCVEPRSPENYFGMKTQPYAGSMAGEFMRDHRRVRREY  
DELKVRVDSLSTTIRQRSDAYNSSTKGDGVRATWMADGTQWPWTWIEQVENHRRGQHAGIVQVILGHPSCKPQLGS  
PASSDNPLDFSNVDTRLPLMLVYMSREKRPGYNHQKAGAMNVMLRVSALLSNAPFVVNFDGDHYINNSQALCAPM  
CFMLDPRDGQNTAFVQFPQRFDDVDPTDRYANHNRFVFDGTMLSLNGLQGPSYLGTMFRRVALYGMPPRYRA  
ENIKLAGKVNEFGSSTSFINSMPDGAIQERSITPVLVDEALSNDLATLMTCAVEDGSSWGRDVGWVYNIATEDVVTGFR  
MHRQGWRSMYCSMEPAAFRGTAPINLTERLYQVLRWSSGGSLEMFFSHSNALMAGRRLHPLQRIAYLNMSTYPIVTVF  
ILAYNLFPVLWLFSEQFYIQRPFQAWGFFTDQARHVLLGMLFNWVILVLLYPFALGIMGKWKRPVILFVMLVMAVGAV  
GLLYVAFHAPYPADDFSEVAASLGEASLTGPSG

>CSLF\_2DS\_TGACv1\_179076\_AA0604160.1\_Triticum\_aestivumMAAAVTRRANALRAEAPDGNTEGRASLA  
ADSPAARAVDAKDDVWVAADDEGDTSGAIAGDGNRPPLFRFTKVKGSILHPYRFMILVRLVAIVAFFAWRVKHKHND  
GVWLWATSMVADVWFGFSWLLNQLPKLNPKRVPDLAALADHSGDANLPGIDIFVTTVPVDEPLLYTVNTILSILAT  
DYPVDKYACYLSDDGGTLVHYEAMIEVANFAVLWVVPFCRKYCVEPRSPENYFGMKTQPYAGSMAGEFMRDHRRVRR  
EYDEFKVRVDSLSTTIRQRSDAYNSSKKGDGVRATWMADGTQWPWTWIEQVENHRRGQHAGIVQVILGHPSCKPQL  
GSPASADNPLDFSNVDTRLPLMLVYMSREKRPGYNHQKAGAMNVMLRVSAMLSNAPFVVNFDGDHYINNSQALRA  
PMCFMLDPRDGQNTAFVQFPQRFDDVDPTDRYANHNRFVFDGTMLSLNGLQGPSYLGTMFRRVALYGMPPRY  
RAENIKLAGKVNEFGSSTSFINSMPDGAIQERSITPVLVDEALSNDLATLMTCAVEDGSSWGRDVGWVYNIATEDVVTG  
FRMHRQGWRSMYCSMEPAAFRGTAPINLTERLYQVLRWSSGGSLEMFFSHSNALMAGRRLHPLQRVAYLNMSTYPIV  
TVFILAYNLFPVLWLFSEQFYIQRPFQTYIMYLVAVIAMIHVIGMFEVKWAGITLLDWCRNEQFYMIGATGVYPTAVLY  
MALKLVTVGKGIYFRLTSKQTDACSNDKXXXXXXXXXXXXXXXXXXXXXXXXXGCRCCSRPSWCCS

>CSLF\_2AS\_TGACv1\_112322\_AA0335290.1\_Triticum\_aestivumMVSPATGGGRGGNAGLAPELLATNDDSDG  
AKHVFGAKAKHWVPADEKEMAASRECGGEDGRPLLYRTFKVRGFLVNTYRFLNLARLTAVIVFFAWRVQHPDSDAM  
WLWWISVVGDFWFGLSWWLNQVPKLNPTICIPTIPLLRQQFDLPDGGSNLPVLDVFISTVDPVEEPLMHTMNSILSILA  
TDYPVDKYATYLSDDGGSLLHYDGLVETAKFAALWVVPFCRKHVVEPRAPESYFGMKVRPYKGNLPEEFLLDHRRLRREY  
EEFKTRLDALFTVIPQRSEAHGREDAKGGGAKATWMADGTQWPWTWTEPAEGHRKGDHAGIIQVMLSQPSGEPQ  
LGAPASSDDNPLDFSAVDVRLPMLVYVSREKRPGYDHQKAGALNVQLRVSALLSNAPFIINFDCDHYINNSQAFRAA  
MCFMMDRRDGDNVAFVQFPQRFDDVDPTDRYANHNRMFFDATMLGMNGIQGPSYVGTGSMFRRVALYGDPPR  
WRPDDVKVLENPNKFGKSMTFINSIPVAANQERSVMSVSLDEPATELADVMTCAVEDGTEWGDGVGWVYDMAT  
EDAVTGFRHLHRTGWRSMYCDMEPPAFCGTAPINMTERMYQILRWSSGGSLEFFSRFCPLLAGRRLHPMQRVAYTNM  
TFYPLSALFVVCYHLLPLMWVFNFRFYIQKPYPTYVMYVLLVIIVSNEVIGMVEIVWAGLTLDDWFRNEQFYMICATGVY  
PTAVLHVLRSLGLKMSFKMTAKQLATGARERFAELYNVQWAPLLIPTLVVIAVNVVAIGAAGKAITWGWSAGQV  
VEAASGLMFNVWILLMFYPFALGVIGRWGKRPYVLFAMFVAFAAIAAVYVAVQAALAGNLLYFQLGHWSIGGAVSL  
PSRRV

>CSLF\_2BS\_TGACv1\_147667\_AA0486240.1\_Triticum\_aestivumMVSPATSGRGGNAGLADPLLATNDDSDG  
ARHVFGAKAKYWAPADEKEMTASRECSGEDGRPLLYRTFKVKGLVNTYRFLNRLARTAVIVFFAWRVQHPDSDAMW  
LWWISVVGDFWFGLSWWLNQVPKLNPTICIPTIPLLRQQFDLPDGGSNLPVLDVFISTVDPVEEPMMLHTMNSILSILAT  
DYPVDKYATYLSDDGGSSLLHYDGLVETAKFAALWVPFCRKHVVEPRAPESYFGMKIRPYTGNLPEEFLLDHRRLRREYE  
EFKTRLDALFTVIPQRSEAHGREDAKGGGGKATWMADGTQWPGTWTEPAEGHRKGDHAGIIQVMLSQPSSEPQLG  
EPASSDDGPLDFSAVDVRLPMLVYVSREKRPYDQKAGALNVQLRVLSALLSNAPFIINFDCDHYINNSQAFRAAMC  
FMMDRRDGDNVAFVQFPQRFDDVDPTDRYANHNRMFFDATMLGMNGIQGPSYVGTGSMFRRVALYGADPPRW  
RPDDVKVLENPNKFGKSMTFINSIPVAANQERSVMSPVSLDEPATELADVMTCAYEDGTEWGDGVGWVYDMATE  
DAVTGFRLHRTGWRSMYCDMEPPAFCGTAPINMTERMYQILRWSSGGSLEVFFSRFCPLLAGRRLHPMQRVAYTNMT  
FYPLSALFVVCYHLLPLMWVFNQRFYIQPYPTYVMYVLIISNEVIGMVEIVWAGLTLDDWFRNEQFYMICATGVYPT  
AVLHVLRSLGLKGISFKMTAKQLATGARERFAELYDVQWAPLLIPTLVVIAVNVVAIGA AVGKAITWGWSAGQVVEA  
ASGLMFNVWILLMFYPFALGVIGRWGKKPYVLFAMFVAFAAIAAVYVAVQAALAGNLPYFQLGHWSIGGAVSLPSR  
RV

>CSLF\_2DS\_TGACv1\_177329\_AA0573830.1\_Triticum\_aestivumMVSPAASGGGNAGLADPLLATNDNSEGAR  
HVFGAKAKYWVPADEKEIAASRECGGEDGRPLLYRTFKVKGLVNTYRFLNRLARTAVIVFFAWRVQHPDSDAMWL  
WWISVVGDFWFGLSWWLNQVPKLNPTICIPTIPLLRQQFDLPDGGSNLPVLDVFISTVDPVEEPMMLHTMNSILSILATD  
YPVDKYATYLSDDGGSSLLHYDGLVETAKFAALWVPFCRKHVVEPRAPESYFGVKIRPYMGNLPEEFLLDHGRLRREYEE  
FKTRLDALFTLIPQRSEAHGREDAKGGGGKATWMADGTQWPGTWTEPAEGHRKGDHAGIIQVMLSQPSSEPQLGEP  
ASSDHSPLDFSAVDVRLPMLVYVSREKRPYDQKAGALNVQLRVLSALLSNAPFIINFDCDHYINNSQAFRAAMCFM  
MDRRDGDNVAFVQFPQRFDDVDPTDRYANHNRMFFDATMLGMNGIQGPSYVGTGSMFRRVALYGADPPRWRPD  
DVKVLENPNKFGKSMTFINSIPVAANQERSVMSPVSLDEPATELADVMTCAYEDGTEWGDGVGWVYDMATEDAV  
TGFRHLHRTGWRSMYCDMEPPAFCGTAPINMTERMYQILRWSSGGSLEVFFSRFCPLLAGRRLHPMQRVAYTNMTFYP  
LSALFVVCYHLLPLMWVFNQRFYIQPYPTYVMYVLIISNEVIGMVEIVWAGLTLDDWFRNEQFYMICATGVYPTAV  
LHVLRSLGLKGMFSFKMTAKQLATGARERFAELYDVQWAPLLIPTLVVIAVNVVAIGVAVGKAITWGWSAGQVVEAA  
SGLMFNVWILLMFYPFALGVIGRWGKRPVLFAMFVAFAAIAAVYVAVQAALAGNLPYFQLGHRSIGGAVSLASRRV

>CSLF\_2BS\_TGACv1\_148916\_AA0495580.1\_Triticum\_aestivumMIYTMNSIISILAADYPVDKHACYLSDDGGSSII  
HYDGLLETAKFAALWVPFCRKHSEPRAPESYFSLNTRPYTGNAPQDFVNDRRHMCREYDEFKERLDALFTLIPKRSVY  
NHAAAKEGAKATWMADGTQWPGTWIDPAENHKKGQHVIGVIVMLKHPSYEPGLGASTNSPLDFSAVDVRLPML  
VYISREKSPSCDHQKAGAMNVQLRVLSALLTNAPFIINFDDGHDHYVNSKAFRAGICFMLDRREGDNTAFVQFPQRFDD  
VDPTDRYCNHNRVFFDATLLGLNGIQGPSYVGTGCMFRRVALYGVDPWRPDDVKIVDSSTKFGSSASFISILPAAD  
QERSIMSPPALEEPMADLAHVMTCAAYEDGTEWGREVGWVYNIATEDVVTGFRLHRNGWRSMYCRMEDAFAGT  
APINLTERLYQILRWSSGGSLEMFFSRNCPLLAGRRLHPMQRIAYANMTAYPVSSVFLVFYLLFPVIWIFRGQFYIQPFPT  
YVLYLVIVIALTELIGMVEIKWAGLTLDDWIRNEQFYIIGATAVYPTAVFHIVLKLFLKGVSKLTAKQVASSTSDKFAELY  
AVQWAPMLIPTMVVIAVNVCAIGASIGKAIVGGWSLMQMADAGLGLVFNWILVLIYPFALGMIGRWSKRPYILFILF  
VIAFILIALVDIAIQAMRSGFVRHFHFKSSGGATFPTSWGL

>CSLF\_2DS\_TGACv1\_178471\_AA0596060.1\_Triticum\_aestivumMIYTMNSIISILAADYPVDKHACYLSDDGGSSII  
HYDGLLETAKFAALWVPFCRKHSEPRAPESYFSLNTRPYTGNAPQDFVNDRRHMCREYDEFKERLDALFTLIPKRSVY  
NHAAAKEGAKATWMADGTQWPGTWIDPAENHKKGQHVIGVIVMLKHPSYEPGLGASTNSPLDFSAVDVRLPML  
VYISREKSPSCDHQKAGAMNVQLRVLSALLTNAPFIINFDDGHDHYVNSKAFRAGICFMLDRREGDNTAFVQFPQRFDD  
VDPTDRYCNHNRVFFDATLLGLNGIQGPSYVGTGCMFRRVALYGVDPWRPDDVKIVDSSTKFGSSASFISILPAAD

QERSIMSPPALEESVMADLAHVMTCAYEDGTEWGSVDGVVYNIATEDVVTGFRLHRNGWRSMYCRMEDAFAGT  
APINLTERLYQILRWSSGSLEMFFSRNCPLLAGRRLHPMQRIAYANMTAYPVSSVFLVFYLLFPVIWIFRGQFYIQKPFPT  
YVLYLVIVIALTELIGMVEIKWAGLTLDDWIRNEQFYIIGATAVYPTAVFHIVLKLFLGKGVSKLTAKQVASSTSDKFAELY  
AVQWAPMLIPTMVVIAVNVCAIGASIGKAIVGGWSLMQMADAGLGLVFNWILVLIYPFALGMIGRWSKRPYILFILF  
VIAFILIALVDIAIQAMRSGFVRFHFKSSGGATFPTSWGL

>CSLF\_2AS\_TGACv1\_112322\_AA0335280.1\_Triticum\_aestivumMGSLLAAANGAGHASNGAGVADQALALEN  
GTGNHKGAGVANRATPPLQANGGSKVAKKISPKDKYWVAADDEGEMAAAADGGEDGRRPILLYRTFKVKGILLHPYRL  
LSLIRLVAIVLFFVWRVRHPYADGMWLWWISMVGDWLFVGTWLLNQVAKLNPVKRVPNLTLLEQQFDLPDGNNSLP  
CLDVFINTVDPINEMPIYTMNSIISILAADYPVDKHACYLSDDGSIHYDGLLETAKFAALWVPFCRKHSEPRAPESYFSL  
NTRPYTGNAPQDFVNDRRHMCREYDEFKERLDALFTLIPKRSVYNHAAAKEGAKATWMADGTQWPGTWIDPAEN  
HKKGQHVGVIVKVMKHPSEPELGLGASTNSPLDFAIDVRLPMLVYISREKSPSCDHQKAGAMNVQLRVSALLTNAP  
FIINFDDGDHYVNSKAFRAGICFMLDRREGDNTAFVQFPQRFDDVDPTDRYCNHNRVFFDATLLGLNGIQGPSYVGTG  
CMFRRVALYGVDPWRPDNVKIVDSSTKFGSSASFISSILPAADQERSIMSPPALEEPVMADLAHVMTCAYEDGTEW  
GREVGWVYNIATEDVVTGFRLHRNGWRSMYCRMEDAFAGTAPINLTERLYQILRWSSGSLEMFFSRNCPLLAGRRL  
HPMQRIAYANMTAYPVSSVFLVFYLLFPVIWIFRGQFYIQKPFPTYVLYLVIVIALTELIGMVEIKWAGLTLDDWIRNEQFY  
IIGATAVYPTAVFHIVLKLFLGKGVSKLTAKQVASSTSDKFAELYAVQWAPMLIPTMVVIAVNVCAIGASIGKAIVGGW  
SLMQMADAGLGLVFNWILVLIYPFALGMIGRWSKRPYILFILFVIAFILIALVDIAIQAMRSGFVRFHFKSSGGATFPTS  
WGL

>CSLF\_5BL\_TGACv1\_409916\_AA1366600.2\_Triticum\_aestivumMSMTYISKKHDAATLDEKEQPKDQKSASVE  
SLLVRTTKLTTVTIKLYRIMVFRMAIFVLFKWRISTALAMISDGATTVRAMWTMPIAGELWFALMWVLDQLPKMQP  
VRRTVFATALEEPLPTMDVFTTADPEKEPPLVTNTILSILAADYPPDKLTCYVSDDGALLTREAHAHAARFARLWV  
PFCRKHGVEPRNPEAYFCPGVKARVVSRAAYMGRSWPELARDRRRVRREYEELRLRIDALHAGDVRPQWSRGTPPEY  
HAGVVEVLVGGPGSTPELGVSDLLDTSVDVRVPAVVYMCREKRHGRVHHRKAGAMNALLRTSAVLSNAPFILNLDLDCD  
HYVNSQALRAGVCLMLDRGGSNVAFVQFPQRFDDGVPADRYANHNRVFFDCTELGLDGLQGPIYVGTGCMFRRAA  
LYNADPPLWRPHGGDRDAGKDVATEADKFGISTPFLVSVRAALNLRSEQWNTTSPPRSFDGAAVGEATALVSCGYE  
DRTAWGRDIGWIYGTVEDVATGFCMHRRGWSAYCATAPDAFRGTAPINLTDRLHQVLRWAAGSLEIFFSRNNALL  
AGARLHPLQRLAYLNTTVPFTSIFLLLYCLLPAIPLVTRSASTSAFSVNTPPSATYIGFVAALMLTLAMVAALEVRWSGITL  
GEWWRNEQFWMVSATSAYAAAVVQVALKVAAGKEIAFKLTSKQRAPSAGGGVVKRQVRGAVRREMDGADGSDG  
GGADGERGVHGSSGTRGTVEERPRGGARDGVQRVGGGASPPVRPWSHGPLEQDVEPPALARRSVHSSITMFCPPFA  
YALIWLLFG

>CSLF\_5DL\_TGACv1\_433902\_AA1424880.1\_Triticum\_aestivumMSMTYITKKHDAATLDEKEPSEDQKSASVK  
NLLVRTTKLTTVTIKLYRLMVFVRLTIFVLFKWRVSTALTVISDGTTTARAMWTMSIAGELWFALMWVLDQLPKMQP  
VRRTVYVTALEEPRLPTMDVFTTTDPEKEPPLVTNTILSILAADYPPDKLTCYVSDDGALLTREAHAHAACFARLWV  
PFCRKHGVEPRNPEAYFCPGVKARVVSRAAYMGRSWPELARDRRRVRREYEELRLRIDALHAGDVRPQQWSRGTAEN  
HAGVVEVLVGGPGSTPELGVSDLLDSSVDVRVPAVVYMCREKRHGRVHHRKAGAMNALLRTSAVLSNAPFILNLDLDCD  
HYVNSQALRAGVCLMLDRGGSNVAFVQFPQRFDDGVPADRYANHNRVFFDCTELGLDGLQGPIYVGTGCMFRRAA  
ALYNADPPLWRPHGGDRDAGKDVATEADKFGISTPFLGVSRAALGLNRSEQWNTTTPPRSFDGAAVGEATALVSCG  
YEDRTAWGRDIGWIYGTVEDVATGFCMHRRGWSAYCATAPDAFRGTAPINLTDRLHQVLRWAAGSLEIFFSRNNA  
LLAGARLHPLQRLAYLNTTVPFTSIFLLLYCLLPAIPLVTRSASASAFSVTMPPSGTYMGFVAALMLTLAMVAVLEVRWS  
GITLGEWWRNEQFWMVSATSAYAAAVVQVALKVSAGKEIAFKLTSKQRASSPGGGVKERFAELYAVRWTVLMVPTA



VVLAVNVMSMAAAVQEGRWRKGPAAVLAMAFNAWVVVHLHPFALGLMGRWSKTLSPLLLLVVGFTVLSLCFVHLH  
HML

>CSLF\_5AL\_TGACv1\_374191\_AA1193100.1\_Triticum\_aestivumMSMTYITKKHDYVASLDGKESPEHEKSASVE  
RLLVRTTKLTTVTIKLYRLVVFVRMIIFVLLFFKWRSSALAMISDGTTTVRAMWTMSIAGELWFALMWVLDQLPKMQP  
VRRTVYATALEESLLPAMDVFTTADPEKEPPLVTVNTILSILAADYPPDKLTCYVSDDGALLTREAQAQAAWFARLW  
VPFCRKHGVEPRNPEAYFCPGVKARVVSADYRAKSWPELARDRRRVRREYEELRLRIDALHAGDVRQQRWVSRGTAE  
DHAGVVEVLVGGPSTPELGVSDLLDLGSVDVRVPAVVYMCREKRHRVHHRKAGAMNALLRTSAVLSNAPFILNLD  
CDHYVNSQALRAGVCLMLDRGGSNVAFVQFPQRFQDVPADRYANHNRVFFDCTELGLDGLQGPIYVGTGCMFR  
RAALYNADPPLWRPHGDRDAGKDVAEADKFGISTPFLGVSRAALNLNQSEQWNTTSPPRSFDGAAVGEATALVSCG  
YEDRTAWGRDIGWIYGTVEDVATGFCMHRRGWSSAYCATAPDAFRGTAPINLTDRLHQVLRWAAGSLEIFFSRNNA  
LLAGPRLHPLQLRAYLNTTVPFTSIFLLLYCLLPAIPLVTRNASTSAFSVNTPPSATYIAFVAALMLTLAMVAVLEVRWSGI  
TLGDWWRNEQFWMVSATSAYAAAVVQALKVAAGKEIAFKLTSKHRASNSGGGVKDRFAELYAVRWTVLMVPTA  
VVLAVNVTSMAAAVQEGRWRKGPAAVLAMAFNAWVVVHLYPFALGLMGRWSKTLSPLLLLVVFVLSLCFVHLH  
ML

>CSLF\_7BL\_TGACv1\_577473\_AA1876170.1

peptideMAPAVAGGGRVRSNEPAAAAASDKPCVCGFQVCACTGSAAVASAASSLDMDIVAMGQIGAVNDESWVGV  
ELGEDGETDESGAAVDDRPFVTEKIKGVLLHPYRVLIFVRLIAFTLFVIWRISHKNPDAMWLWVTSICGEFWFGFSWLL  
DQLPKLNPINRVPDLAVLRQRFDRPDGTSTLPGLDIFVTTADPIKEPILSTANSVLSILAADYPVDRNTCYVSDDSGMLLTY  
EALAESSKFATLWVPFCRKHGIEPRGPESYFELKSHPYMGRAQDEFVNDRRRVRKEYDEFKARINSLEHDIKQRNDGYN  
AANAHEREGPRPTWMADGTQWEGTWVDASENHRRGDHAGIVRLLNHPSHRRQTGPPASADNPLDFSGVDARLP  
MLVYVSREKRPQHDHQKAGAMNALTRASALLSNPFILNLDCHYINNSQALRAGICFMVGRSDTVAFVQFPQRF  
GVDPTDLYANHNRIFFDGLRALDGMQGPPIYVGTGCLFRRITVYGFDPFRINVGPCFPRLAGLFAKTKYEKPSLEMTM  
AKAKAAPVPAKGKHGFLPLPKTYGKSDAFVDSIPRASHPSYAAAAEGIVADEATIVEAVNVTAAFEKKTGWGKEIG  
WVYDVTEDVVTGYRMHIKGWRSRYCSIYPHAFIGTAPINLTERLFQVLRWSTGSLEIFFSKNNPLFGSTYLHPLQRVAYI  
NITTYPFTAIFLIFYTTPALSFTVGHFIVQRPTTMFYVYLGIVLSTLLVIADVLEVKWAGVTVFEWFRNGQFWMTASCSAY  
LAAVCQVLTKVIFRRDISFKLTSKLPSGDEKDPYADLYVVRWTPMITPIIIIFVNIIGSAVAFKVLGDGEWTHWLKVAGG  
VFFNFVWVLFHLYPFAKILGKHGKTPVVVLVWVAFTFVITAVLYINIPMHSSGGKHTTVHGHGKGFVDAGYYNWP

>CSLF\_7AL\_TGACv1\_555973\_AA1751470.1

peptideMAPAVAGGGRVRSNEPAAAAAPAAASGKPCVCGFQVCACTGSAAVASAASSLDMDIVAMGQIGAVNDE  
WVGVELGEDGETDESGVAVDDRPFVTEKIKGVLLHPYRVLIFVRLIAFTLFVIWRISHKNPDAMWLWVTSICGEFWFG  
FSWLLDQLPKLNPINRVPDLAVLRQRFDRPDGTSTLPGLDIFVTTADPIKEPILSTANSVLSILAADYPVDRNTCYVSDDSG  
MLLTYEALAESSKFATLWVPFCRKHGIEPRGPESYFELKSHPYMGRAQDEFVNDRRRVRKEYDEFKARINSLEHDIKQRN  
DGYNAANAHEREGPRPTWMADGTQWQGTWVDASENHRRGDHAGIVLVLNHPSHRRQTGPPASADNPLDFSGV  
DVRLPMLVYVXXXXXXXXXXXXXXXXXXXXXXXXXXXXXXXXXXANHNRIFFDGLRALDGMQGPPIYVGTGCLFRRITV  
YGFDPFRINVGPCFPRLAGLFAKTKYEKPGLEMTMAKAKAAPVPAKGKHGFLPLPKTYGKSDAFVDSIPRASHPSY  
AAAAEGIVADEATIVEAVNVTAAFEKKTGWGKEIGWVYDVTEDVVTGYRMHIKGWRSRYCSIYPHAFIGTAPINL  
RLFQVLRWSTGSLEIFFSKNNPLFGSTYLHPLQRVAYINITTYPFTAIFLIFYTTPALSFTVGHFIVQRPTTMFYVYLGIVLST  
LLVIADVLEVKWAGVTVFEWFRNGQFWMTASCSAYLAAVCQVLTKVIFRRDISFKLTSKLPSGDEKDPYADLYVVRWTP  
LMITPIIIIFVNIIGSAVAFKVLGDGEWTHWLKVAGGVFFNFVWVLFHLYPFAKILGKHGKTPVVVLVWVAFTFVITAVL  
YINIPMHSSGGKHTTVHGHGKGFVDAGYYNWP

>CSLF\_7DL\_TGACv1\_607937\_AA2011180.1\_Triticum\_aestivumMVGRSDTVAFVQFPQRFEGVDPTDLYAN  
HNRIFFDGTLRALDGMQGPYYVGTGCLFRRITVYGFDPPIRVGGPCFRLAGLFAKTKYEKPGLEMTMAKAKAAPVPA  
KGKHGFLPLPKKTYGKSDAFVDSIPRASHPSYAAAAEGIVADEATIVEAVNVTAFAFEKKTGWGKEIGWVYDVTEDV  
VTGYRMHIKGWRSRYCSIYPHAFIGTAPINLTERLFQVLRWSTGSLEIFFSKNNPLFGSTYLHPLQRVAYINITYPFTAIFLI  
FYTTVPALSFTVGHFIVQRPTTMFYVYLGIVLSTLLVIAVLEVKWAGVTVFEWFRNGQFWMTASCSAYLAAVCQVLTKV  
IFRRDISFKLTSKLPSTGDEKDPYADLYVVRWTPMITPIIIIFVNIIGSAVAFKVLVDGEWTHWLKVAGGVFFNFVWVLFHL  
YFPAKGLGKHGKTPVVVLVWVAFTFVITAVLYINIPHMHSSGGKHTTVHGHGKFKVDAGYYNWP

>CSLF\_1BS\_TGACv1\_049866\_AA0163180.1

peptideMASPAAGGGRLADPLLATDVVVGPKDKYVWPADEREILASHRSGAGDDGRAPLLYRTFRVKGPLINLYRL  
LTLVRVIVVILFFTWRMRHRSDAMWLLWISVVGDLWFGVTWLLNQITKLRPRKCVSISVLRQLDQPDGGSDDLPLL  
DVFINTVDPVDEPMLYTMNSILSILATDYPVDKYATYFSDDGSLVHYEGLQLAAEFAASWVPFCRKHCVEPRAPESYF  
WAKMRGEYAGTAPKEFLDDHRRMRAAYEEFKVRLDGLSAAIEQRSEACNRANGKEEGADATWMADGSTQWQGT  
WIKPAKGHRKGGHHPAILQVMLDQPSKDPELGMAASSGHPLDLSAVDARLPMLVYIAREKRPYGDHQQKAGAMNVQL  
RVSALLSNAPFIINFDDGHDYVNSQAFRAAMCFMLDPRDGADTAFVQFPQRFDDVDPTDRYCNHHRMFFDATTLLGL  
NGIQGPSFVGTGCMFRRVALYSADPPRWRPDDAKEAKASRYRPNMFGKSTSFINSVPAANQERSVSPATVGEAEL  
ADAMTCAYEDGTEWGNVGVVYNIATEDVVTGFRHLRHTGWRSTYCAMEPDAFRGTAPINLTERLYQILRWSSGSLE  
MFFSRFCPLLAGRRLLHPMQRIAYINMTTYPVSTFFICMYFYFVPMWLFQGEFYIQRPFQTFALFVVIATVELIGMVEIR  
WAGLTPLDWFRNEQFYIIGTTGVYPMAMLHILRSLGIKGVSKLTAKKLTSGTRERLAELYDVQWVPLLPTVVVMAV  
NVAAIGAAAGKAIAGRWSAAQVAGAASGLVFNVMLLLLYPFALGIMGRWSKRPYILFIVLVTAVAATASVYVALAGS  
LPYLHSGIKLV

>CSLJ\_3AS\_TGACv1\_210908\_AA0681280.2\_Triticum\_aestivumMAARPSQDAPLQLHTVQTDQPLATVNRLLA  
ALHVALAAAAIAHRGAHVMLAPDLVLLFLWALSQAPMWRPVSRAAFPSRSLRPAALPAVDVMVVTADPDKEPAAKVM  
NTVVSAMALDYPGGRLSVYLSDDAGSPRTLLAARKAYALARAWVPFCRKYGVRCPDRFFAGDDQLDLGDHHRQEL  
DDRLRIKNVYETFKEGVEEVMNDATLSQSWTKADHHAHVEIITDEQQDSSHSNSGDGDGEDAMPLLVYVSREKR  
RSSTHHFKAGALNVLLRVSSLMSNSPYVMVLDCDMYCNRSLSLEAMCFHLDGRRRADLAFVQFPQMFMHNLSSSDIYA  
NELRPIFWVRKKTNRPCIASVIFSEFSSNLGACMVQTRWKGLDGLRGPILSGTGFCVRRDAVYAGPGSSQEFGVGEV  
GELKRRFGVSNGHASLRSGTGSTIVAAGDVLPPQDAELVASCDYETGTEWGEDVGFYQSVVEDYFTGYRQLYCRGW  
TSVYCFPATGSRPPFLGSVPTNLNDALVQNKRWMSGLLAVGLSRHCPLASAAAISVPQSMGFAYYAFTPLYAFPLLCYA  
TVPQLCFLRGATSFPEAASTLWFAAVFASSLQHLVEVSVAKRGLAARTWWNEQRFWALNAVTGQIFACLGVALS LG  
AGGRAVDLTSKASGDRLYRDGVDFAGCSALLLPATTLCLLNAAALVGGVWKMVGRGGNVSGTGELFLLCYVAALS  
YPLLQGMFLRRDPARVPARITAVSVAIVATLLSLFG

>CSLJ\_3B\_TGACv1\_221705\_AA0747940.1\_Triticum\_aestivumMAAKPSQDAPLQLHTVEVDQPIATVNRLLA  
HVALAAAAIAHRGAHVMLAADLVLLFLWALSQAPMWRPVSRAAFPSRSLRPAALPAVDVMVVTADPDKEPAAKVMN  
TVVSAMALNYPGGRLSVYLSDDAGSPRTLLAARKAYAFARAWVPFCRKYGVRCPDRFFAGDDQLDLGDHHRQELD  
DDRLRIKKMYETFKEGVEEVMMSDAALSQSWTKADHDAHVEIITGDEQDSSNSNSGDGEEDEDATPLLVYVSRGKRRSS  
THHFKAGALNVLLRVSSLMSNSPYVMVLDCDMYCNRSLSLEAMCFHLDGRRRADLAFVQFPQMFMHNLSTSDIYANL  
RSIFWTRWKGLDGLRGPILSGTGFCARRDAIYGALPASSQDQFSGVEVGEVGLKRRFGVSNGHASLRPGTGSTIVARDAL  
PQDAELVACCDYETGTEWGEVGFYQSVVEDYFTGYRQLYCRGWTSVYCFPATGSRPPFLGSVPTNLNDALVQNKR  
WMSGMLAVGLSRHCPLASAAAISVPESMGFAYYAFMAYAFVLCYAIVPQLCFFRGGTSFPEASTLWFAAVFVSSSL  
QHLVEVSVAKRGLAARTCWNEQRFWALNAVTGQLFACLSVALNLVDGAGGRAVDLTSKASDDRLYRDGVDFAG

CSTLLLPTTLCLLNAAAALVGGVWKMVGRGGNMPGELFLLCYIAALSYPQLLQGMFLRRDLARV PARITAMSVAMVATL  
LSLFG

>CSLJ\_3DS\_TGACv1\_272756\_AA0924850.1\_Triticum\_aestivumMATKPSQDAPLPLHTVQTDQPLATVNRLLA  
AVHLALGAAAIAHRGAHVMLAADLVLFLWALSQAPMWRPVSRTAFPSRSLRAALPAVDVMVVTADPEKEPAKVM  
NTVVSAMALDYPGGRLSVYLSDDAGSPRTLLAARKAYAFARAWVPFCRKYGVRCPDRFFAGDDKLDLGSHHHEL  
ADDRLRIKNMYETFNEGVREVMSDADLSQSCTKADHDAHVEITGDEQDSSNSNSGDGEEDEDAMPLLVVVSREKRRS  
STHHFKAGALNVLLRVSSLLSNSPYVMVLDCDMYCNSRSSILEAMCFHLDGRRRADLAFVQFPQM FHNLSSSDIYANEL  
RSIFWTRWKGLDGLRGPILSGTGFCARRDAIYGARPASSQDQFSGVEVGELKRRFGVSNGHASLRRSGTGSTIVARDAL  
PQEDAELVASCAYETGTEWGEQVGFYQSVVEDYFTGYRQLYCRGWTSVYCFPAAASRPPFLGSVPTNLNDALVQNK  
RWMSGMLAVGLSRHCPLASAAICVPQSMGFAYYAFMALYAFPVLCYATVPQLCFLRGGTSFPGAASLWFAAVFASS  
SLQHLVEVSVAKRGLALRTWWNEQRFWALNAVGTGQLFACLGVALNLV GAGGRAVDLTSKASDDRLYRDGVDFDA  
GCTLLLLPTTLCLLNAAAALVGGVWKMVGRGGSVSGELFLLCYVAALSYPQLLQGMFLRRDPARVPAPITAMSVAMVAA  
LSLFG

>CSLJ\_3DS\_TGACv1\_272297\_AA0918580.1\_Triticum\_aestivumMAAEPSQDAPLQLHTVQTDQPLATVNRHLA  
ALHVALAAAIAHRGAHVMLAADLVLFLWALSQAPMWRPVSRAAFPSRSLRAALPAVDVMVVTADPDKEPAKAV  
MNTVVSAMALDYPGGRLSVYLSDDAGSPRTLLAARKAYAFARAWVPFCRKYGVRCPDRFFAGDDQLDLGGHHRQ  
ELDDDRLRIKNMYETFKEGVEKVMNDAALSQSWTKADHDAHVEQDSSNSNSGDGEEDEDAMPLLVVVSREKRSSA  
HHFKAGALNVLLRVSSLLMSNSPYVMVLDCDMYCNSWSSVLEAMCFHLDGRRRADLAFVQFPQM FHNLSSSDIYANE  
LRSIFWAGPTGLRDAVERRGRPPGPILSGTGFCVRRDAVYGAGPGSSQDHQSSGVEVGELKRRFGVSNGHASLRRSGT  
GSTIVARDGLPQPQEDAELVASCYETGTEWGEVGFYQSVVEDYFTGYRQLYCPGWTSVYCFPATGTRPPFLGSVPT  
NLNDALVQNKRWMSGMLAVGLSRHCPLASAAVSPQSMGFAYYAFMALYAFPVLCYATVPQLCFLRGGTSFPGES  
ALWFAAVLASSSLQHLVEVSAKRGLAARAWWNEQRFWALNAVGTGQLFACVSVALS LGAGGRAVDLTSKASDD  
RLYRDSVDFDFAGCSALLPATTCLLNNTAALVGGVWKMVGRGGSVSGELFLLCYVAALSYPLEGMFLRRDPARVPAWI  
TAMSVAMVATLLSLFG

>CSLH\_3DS\_TGACv1\_271739\_AA0907200.1\_Triticum\_aestivumMSSAMKQERVIVPRTAWKLADIFILCLL FAL  
LSCRVLSLGEGGAGAASVAALVCEAWFTFVWILNMNIRWNPVRFHTYPENLSQRMDGLPAVDMLVTTADPELEPPL  
MTVNTVLSLLAMDYPDVDKLACYVSDDGCPVTCYALHEAARFAGLWVPFCKRHGVRAPFMYFASRPEPELAGDN  
FSDEWTFIKSEYDKLVSRIESADEGSLLRDDDAGEFTEFMEAKRGDHPGIVKVLWDNSKSSRTGEGFPNLVYVSREKSRK  
HDHHYKAGAMNVLARSAVMTNAPIILNVDCDMFVNNSQVVLHAMCLLLGFDDDETCSGFVQVPQRFYGLKDDPF  
GNQMEVLREKLFGLAGLQGIYYLGMGCFHRRKIIYGVAPSSAAIKHEREGSRSYEDLRTKFGASVELVESARNIYSGEI  
PPSPMIDISSRIQVAKQVSSCNYETDTHWGQEIGWSYGSM AEDILTGQRIHSSGWKSTLLDTNPPAFLGCAPTGGPASL  
TQYKRWATGLLEILLGQNSPIMATVFKRLQFRQSLAYLVFYVWSMRAPFELCYALLGPFLFRNQSFLLKASNHGFSIQL  
ALFLSYNIYNFVEYMECGLSARTWWNNMRMQRIVSISSWLLDFLSVVLKTIGLSKTVFEVTRKDKSTSDGDPSTHETDL  
GWFTFDSSPVFILVTTVAILNIATIAIGVWRHAIFWMITGNHDCQNIGELCVLDG

>CSLH\_3AS\_TGACv1\_212952\_AA0704280.1\_Triticum\_aestivumMIDISSRIQVAKQVSSCNYETDTHWGQEIG  
WSYGSM AEDILTGQRIHSSGWKSTLLDTNPPAFLGCAPTGGPASLTQYKRWATGLLEILLGQNSPIIATIFKRLQFRQFLA  
YLVFYVWSMRAPFELCYALLGPFLFRNQSFLLKASNHGFSIQLALFLSYNIYNFVEYMDCGLSARTWWNNMRMQRIV  
SISSWLLAFLSVLKTIGLSKTVFEVTREDKSTSDGDPSTHETDLGWFTFDSSLVFIPVTTVAILNIATIAIGVWRHAIFWMI  
TGNHDWQNI GEFICCGWAILYFWPFIKGLVGRGRYGIPWNVKLA WVVIVVAFVLYFCRGD

>CSLH\_3B\_TGACv1\_222234\_AA0760340.1\_Triticum\_aestivumMSSAMKLQERSVPRTAWKLADIFILCLLFAL  
LSCRVASLREGGASVAALVCEAWFTFVWIINMNIKWNPVRFNTYPENLSQRTDELPAVDMLVTTADPELEPPLMTVNT  
VLSLLAVDYPDVKLACYVSDDGCSPTCYALREAAAGFARLWVPFCKRHGVGVRAPFMYFASSRPEPELAGDWTFIKSE  
YDKLVSRIESADEGSLLRHDDAADFTEFKEAKRGDHPAIVKVLWDNSKSSRTGSGDGFNPLVYVSREKTRKHDHYYKAG  
AMNVLARVSAMVTNAPIILNMDCDMFVNNPQVVLHAMCLLLGFNDETCSGFVQVPQRFYAKLKDDPFGNQIEVLE  
KLLGGLSGLQGIYYLGTGCFHRRKIIYGVAPPSFAAVKHERQGSPTYEDLRTKFGASVELAESARNIYSREIPLKPMIDISSRI  
QVAKQVSSCNJETGTHWGQEIGWSYGSMAEDILTGQRIHSAGWKSTSPDTNPPAFLGCAPTGGPASLTQYKRWATG  
LLEILLGPNTPIIATIFKRLQFRQYLVFYVWSMRAPFELCYALLGPFCLFRNHSFLLKASNHGFSIQLALFLSYNIYNFVE  
YMECGLSARTWWNNMRMQRIVSLSSWLLAFLSVLKTIGLSKTVFEVTRKDKSTSDGDPSTHETDLGWFTFDSSPVFIP  
MTAVAILNIVTIAIGVWRHAIFWMTTGNHDCQNI GEFLLCCGLMILYFWPFIKGLVGRGRYGIPWNVKLAWVIVVAFL  
YFCRGD

>CSLH\_3B\_TGACv1\_221049\_AA0728260.1\_Triticum\_aestivumMSSAMKLQERTVPRTAWKLADIFILCLLLVL  
LSCRVASLGEAGAGAAALVCEAWFTFVWILNMNIKWNPVRFHTYPENLSQRMDDELPAVDMLVTTADPELEPPLMTV  
NTVLSLLAVDYPDVKLACYVSDDGCSPTCYALREAAAGFARLWVPFCKRHGVGVRAPFIYFASSRPEPDLAGDKFSDD  
WIFIKSEYDKLVSLIESADEASLLRHDHAGEFTEFKGAECGDHPAIVKVLWDNSKSSGTGEGFPNPLVYVSREKSRKHDH  
YKAGAMNVLARVSAMVTNAPIILNVDCDMFVNNPQVVLHATCLLLGFDDDETCSGFVQVPQRFYGLKDDPFGNQME  
VLRSLSYEDLLTKFGASMELVESSRNISVEIPPKPMIDITSRIQVAKQVSTCNJETGTHWGEEASNHGFSIQLALFLSYNIY  
NFVEYKECGLSARTWWNNMRMRINLLLAPCFP

>CSLH\_3DS\_TGACv1\_273502\_AA0931770.1\_Triticum\_aestivumMGSAMKLQERVILPRTAWKLADIFILCLLFAL  
LSCRVASLGDGGAGAASVAALVCEAWFTFVWILNMNIKWNPVRFHTYPENLSQRMDDELPAVDMLVTTADPELEPPL  
MTVNTVLSLLAVDYPDVKLACYVSDDGCSPTCYALREAAWFARLWVPFCKRHDVVRAPIIYFASRLEPELAGDTFS  
DEWTFIKSEYDKLVSRIESADEGSLLRHDDAGEFTEFMEAEERTDHPAIVKVLWDNSKSSRTGEAFPHLVYVSSEKSRKHH  
HHYKAGAMNVLARVSAMVTNAPIILNVDCDMFVNNPQVVLHAMCLLLGFDDDETCSGFVQVPQRFYGLKDDPFGN  
QMEVLRKLLGGLSGLQGIYFYLGTGCFHRRKIIYGVAPSSFAAVKHEREGSLSYEDLRTKFGASVELVESTRNIYSREIPPKP  
MVNISSCIQVAKQVSSCNJETGTHWGQEIGWSYGSMAEDILTGQRIHSAGWKSTLLDTNPPAFLGCAPTGGPASLTQ  
YKRWATGVLEILLGQNCPIIATIFKRLQFRQCLAYLVFYVWSMRAPFELCYALLGPFCLFRNHSFLLKHQTMVSASN

>CSLH\_2AL\_TGACv1\_094351\_AA0296300.3\_Triticum\_aestivumMAGGKKLHERVALGRTAWMLADFVILLLLL  
ALVARRAASLGERGGTWLAALVCEAWFAFVWILNMNGKWSPVRFDTYPENLSHRLEELPAVDMFVTTADPALEPPLI  
TVNTVLSLLALDYPDVGKACYVSDDGCSPTCYALREAAKASLWIPFCKRYDVGVRAPFMYFSSAPEVGTGTADHEFL  
ESWALMKTEYEKLASRIENADEVSILRDGGEEFAEFIDAERGNHPTIVKVLWDNSKSKAGEGFPNPLVYLSREKSPRHRHN  
FKAGAMNVLTRVSAMVTNAPIMLNVDCDMFANNPQVALHAMCLLLGFDDDEIHSGFVQAPQKQFYGGGLKDDPFGNQ  
MQVITKKIGGGLAGIQGTIFYGGTGCFFHRRKVIYGMPPPDTVKHETRGSPSYKELQAKFGSSKELIESSRNIIISGDLLARPT  
VDISSRVEMAKQVGDNYEAGTCWGQEIGWVYGSMTEDILTGQRIQAAGWESALLDTPPAFLGCAPTGGPASLTQ  
FKRWATGLLEILSRNSPILGTIFKGLQLRQCLGYLIVDAWPVRAPFELCYALLGPFCLLNQSFPTASDEGFHIPAALFLTY  
NIYHLMYKECGLSVRAWWNHRMQRITSASAWLLAFLTVILKTLGLSETVFEVTRKESSTSSDGGAGTDDADPGLFTF  
DSAPVFIPVTALSVLNIVALTVAAWRAVVGTAVAGVHGGPGVGEFVCCGWMVLCFWPFVGRGLVSSGKYGIPWSVRVK  
AGLIVAAFVHLCTRN

>CSLH\_2DL\_TGACv1\_158387\_AA0517170.1\_Triticum\_aestivumMAGGKKLQERVALGRTAWMLADFVILLLLL  
ALVARRAASLGERGGTWLAALVCEAWFAFVWILNMNGKWSPVRFDTYPDNLSHRMEELPAVDMFVTTADPALEPPL

ITVNTVLSLLALDYPDVGLRACYVSDDGCSPTCYALREAAKFAGLWVPFCKRHDVGVWRAPFMYFSSAPEVGNVTVDH  
EFLESWALMKSQYEKLARRIENADEGTIMRDGGDEFAEFIDAERGNHPTIVKVLWDNSKSKAGEEFPFLVYLSREKSPR  
HRHNFKAGAMNVLTRVSAVMTNAPIMLNVDCDMFANNPQVALHAMCLLLGFDDEIHSFGVQAPQKQFYGGGLKDDPF  
GNQMQVITKKIGGGLAGIQGMFYGGTGCFFHRRKVIYGVPPPDTVKHEMKGSPSYKELQAKFGSSKELIESSRNIISGDL  
ARPTVDLSSRVEMAKQVGDNCYEAGTCWGQEIWVYGSMTEDILTGLRIHAAGWESALLDTEPPAFLGCAPTGGPAS  
LTQFKRWATGLLEILISQNSPILGTIFRRLQLRQCLAYLIVEAWPVRAPFELCYALLGPFCLLTNQSLPTASDEGFRIPAALF  
LTCHYHLMMEYKECGLSVRAWWNNHRMQRITSASAWLLAFLTVILKTLGLSETVFEVTRKESSTSSDGGAGTDEADPGL  
FTFDSAPVFIPVTLSMLNIVALAVAAWRAVVGAAAGVHGGPGIGEFVCCGWIVLCFWPFVVRGLVSRGKYGIPWSVRV  
KAGLIVAAFVHICTRN

>CSLH\_2BL\_TGACv1\_129372\_AA0380770.1\_Triticum\_aestivumMHRGEDSLSGLYKCTLAFVACGCGWSCGVV  
LLASLLLVASYLSATAMAGGKQLQERVALGRSAWMLADFVILFLVLALVARRAASLGERGGTWLAALVCEAWFAFWV  
ILNMNGKWSPVRFDTYPENLSHRMEELPAVDMFVTTADPALEPLITVNTVLSLLALDYPHVGKLACYVSDDGCSPLTC  
YSLREAAKFASLWVPFCKRHDVGVWRAPFMYFSSAPEVDTGTVDFEFLESWALMKSEYEKLASRIENADEVSILRDGGDE  
FAEFIDAERGNHPTIVKVLWDNSKNKTGEGFPFLVYLSREKSPRHRHNFKAGAMNVLTRVSAVMTNAPIMLNVDCD  
MFANNPQVALHAMCLLLGFDDEIHSFGVQAPQKQFYGGGLKDDPFGNMQMQVITKKIGGGLAGIQGTFYGGTGCFFHRRK  
VIYGMPPPDTVKHETRGSYKELQAKFGSSKELIESSRNIISGDLARPTVDISSRVEMAKQVGDNCYEAGTCWGQEI  
WVYGSMTEDILTGQRIQAAGWESALLDTPPAFLGCAPTGGPASLTQFKRWATGLLEILISRNPSILGTIFRRLQLRQCL  
AYLIVNAWPMRAPFEMCYALLGPFCLLTNQSLPTTSNEGFRIPAALFLSYHVYHLMMEYKECGLSVRAWWNNHRMQRI  
TSASAWLLAFLTVILKTLGLSETVFEVTRKESSTSSDGGTGTDEADTGLFTFDSAPVFIPVTALSMLNIVALAVAAWRAV  
GTAAGVHGGPGVGEFVCCGWMVLCFWPFMRGLVSSGKYGIPWSVRVKAGLIVAAFVHLCTRN

>AT1G23480\_CsIA3MSPFLKFFFLYDYLSPSSFFLVQRNTLGASLDTTGDVVRSIGIIEIYWKQTRIFVFIPLKCLVTIC  
LVMSLLFIERYMMSIVVVFVKLLRRTPEKVHKWEPINDDLELANTNYPMVLIQIPMYNEKEVCQLSIGAACRLSWPLD  
RMIVQVLDSDTPASKELVNAECDKWARIGINIMSEIRDNRIGYKAGALKAGMMHNYVKQCEFVAIFDADFQDPDF  
LERTIPFLIHNHEISLVQCRWKVFNANECLMTRMQEMSLNYHFVAEQESGSIHAFFGFNGTAGVWRIAALNEAGGW  
KDRTTVEDMDLAVRACLHGWKVYVHDVEVKNELPSTFKAYRFQQHRWSCGPANLWRKMTMEILQNKKVSAAWKKL  
YLIYNFFFIRKIVVHIFTVFYCYLILPTTVLPELQVPKWATVYFPTTITILNAIATPRSLHLLVFWILFENVMSMHRTKATFIG  
LLEAGRNEWVVTEKLGDTLKSCLIGKATTKLYTRFGQRLNWRELVVGLYIFFCGCYDFAYGGSYFYVYLFQSCAFFVAG  
VGYIGTFVPTV

>AT1G24070\_CsIA10MTTFLKSLIFLQDSCLAFLSLMFHRGSEDAEALKKLETSINGARISFDTTWTREFRSLFIVPLFK  
CLVAFCLIIISLLVFIIEGIYMNLLVLYVKVFERKPEKVYRWEAMQEDIELGHETYPMVLVQIPMYNEKEVLQLSIGAACRLI  
WPLDRLIVQVLDSDTQTIKELVNTECAKWSKGVNICKERRDNRNGYKAGALKEGMKHNYVKLCNYVVFIDADFQPE  
PDYLQHSVPFLVHNPEVALVQARWRFMNANKCLMTRMQEMSLNYHFMAEQESGSTRHAFFSFNGTAGVWRMAA  
MEEAGGWHDRTTVEDMDLAVRAGLLGWKFVFLNDLTVKSELPSKFAFRFQQHRWSCGPANLFRKMIMEIIRNKRV  
TIWKKLYLVYVFFFLRKHIVHCFTFIFYCVILPTSVFFPEVNIPAWSTFYIPSMITLCIVATPRSFYLVIFWILFENVMSMHRTK  
GTFIGILERQRVNEWVVTEKLGDAKTKLLPRIGKPSNMFLERVNSKEIMVGIYLCCACYGLFFGNTLLYLYLFMQAVAF  
ISGVGFVGT

>AT2G35650\_CsIA7MSPLPIFHRLPHATFSSFLLSQAGSSKTSVAFLNAFKSEDIARIGLWWQLIRAVVVVVPFKFLV  
LLCLVMSVMFFVEVMYMGIVVLYVKLFRKPEKFKWEAMEDDVECGSASYPMLVQIPMYNEKEVCEQSIAAACKIS  
WPSNRIIIQVLDSDTPASKELVKKECDRWSKEGVNITFEIRDNRNGYKAGALREGMRHSYVKQCDYVAIFDADFQDP

DFLHRTVPFLIHNPKLALVQGRWEFVNAGQCMTRLQEMSLSYHFTIEQQVGSSTFAFFGFNGTAGVWRISALNESG  
GWNDQTTVEDMDLAVRATLRGWKFLYIDDLKVKSELPCSFKALRSQQHRWTCGPANLLRKMAGQIIRSENVSLWKK  
WYMLYSFFFMRKIVAHILTFCFYCVILPATVLFPEVTVPKWAAFYPLSLITLLIAIGRLRSIHLLAFWVLFENAMSLLRKAL  
VMGLFETGRVQEWWVTEKLGDTLTKLIPQVPNVRFRERVHLELLLVGAYLLFCGIYDIVYGKNTLYVYLLFQSVAFFVVG  
FGFVGKYVPASSYLA

>AT3G56000\_CsIA14MATLSDGLFDDMSVLGVIGYVLEQTRFIFLVPILKRLVNLQVVSVLLFVDAAYMAIVVAIVKLL  
GRTPQKVLKWESEFKSDDIELAPSSNHPMVLIIQIPFNEKEVCQLSIGAACKLSWPLDRMIIQVLDSTEEESQKLVRECK  
KWESEGITIKSEVRGGFREGFKAGALTAGMKHSYVDEYKCEVVFVDFADQPEPDLERTVPFLVHNPEIALVQAGWKY  
GNADECCMTRIQEMSLNYHFAVEQKSGSSILGFFGFNGTAGVWRICALNEAEGWKDRTIVEDMDLAVRAYLRGSKFV  
YVDDVKVKNELPSSFQAYRFQQRWVSCGPANLFKKIAMEIKNQNVSLWKKVYLIYNFFFLRKIVVHIFTVFYCVILPAT  
VIFPEIEVPKWTTIYIPATITILNAIATPKSFYLILYVILFENVMMAMHRSIGTLIGLLETSRVKEWIVTQKLGESNNLRENLIFF  
DHYSFPERLRWREIMVGMVYLFICGYDFVFGRTYLYVYLLFQSIAFFVVGVGYPVSTPVQTSE

>AT4G13410\_CsIA15MFLLLKPLLSLHDLNLLSVMFHGETLKASVDGGINMSTMWRETRNVFVPLFKCIVVMCLII  
SLLVFVESVYMNLVLYVKLFNRKPEKVYKWEAMQEDMELGHQNYPMVLVQIPMYNEREVFELSIGAACRLTWPSDR  
LIVQVLDSTDPAIMELVSMECTKWASKDININERRENNGYKAGALKHGMRHSYVKQCQYLAIADDFQPEPDYLO  
RAIPFLIHNPEVALVQARWRVFNANTCLMTRMQEMSLNYHFMAEQSGSTRHAFFGFNGTAGVWRMVAMEEAG  
GWKDRTTVEDMDLAVRVGLLWKFIFVNDLEVKSELPSQFKAFRFQQRWVSCGPANLIRKMTMEIHNKRVKIWKKF  
YVIYSFFFLLRKIVVHFFTYFFYCVILPSTVFLPEVNIPNWSTIYVPSVITLLSAIATPRSFYLVIFWVLFENVMMAMHRTKGTIG  
LFEGGRVNEWVTEKLGDTLNTKLLPQNGRLPKRVNLKEMMMGIYLCCACYDFAFGNAFLYLYLFMQATAFLISGVG  
FVGT

>AT4G16590\_CsIA1MVDLVVQVVDFTDPAVREGVDVEIAKWQSQGINIRCERRDNRNGYKAGAMKEALTQSYVK  
QCDFVAVFDADFQPEPDYLIRAVPFLVHNPVALVQARWIFVNANKCLMTRMQEMSLNYHFKEVEQESGSTRHAFFG  
FNGTAGVWRISAMEAAGGWKSRTTVEDMDLAVRVGLHGWKVYVNDLTVRNELPSKFKAYRFQQRWVSCGPANLF  
RKMTMEIIFNKRVSIIWKKFYVIYSFFFVRKAVHFLTFYFVIVPTSVFFPEIHIPSWSTIYVPSLISIFHTLATPRSFYLVIFW  
VLFENVMMAMHRTKGTICIGLLEGGRVNEWVTEKLGDAKSKLLSRVVRKSCYQRVNSKEVMVGVYILGCALYGLIYG  
HTWLHFYLFQATAFFVSGFGFVGT

>AT5G03760\_CsIA9MELGDTTSPVDSFMGYRDDITMQMSMVLQIRAPLIVPALRLGVYICLTMSVMLFVERVYMG  
IVISLVKLFGRKPKDRFKYEPIKDDIELGNSAYPMVLIIQIPMFNEREVYQLSIGAACGLSWPSDRIVIQVLDSTDP  
TIKDLV  
EMECSRWASKGVNIKYEIRDNRNGYKAGALKEGMKKSIVKSCDYVAIFDADFQPEADFLWRTVPYLLHNP  
KLALVQAR  
WKFVNSDECLMTRMQEMSLDYHFTVEQEVGSSTYAFFGFNGTAGIWRISALNEAGGWKDRTTVEDMDLAVRASL  
K  
GWKFLYLGSLKVNELPSTFKAYRYQQRWVSCGPANLFRKMAFEIMTNKNVTLWKKVHVIYSFFFVRKLV  
AHIVTFIFY  
CVILPATVLPVTVPKWGAIVYIPSVITLLNAVGT  
PRSLHLMVFWILFENVMSLHRTKATFIGLLEGGRVNEWIVTEKLG  
DVKAKSATKTSKKVIRFRFGDRIHVLELGVGMVYLLFVGCYDAFFGKNHYLYLFAQAI  
AFFIAGFGQIGTIVPNH

>AT5G16190\_CsIA11MQEDLEGNQNFPMVLVQIPMYNEREVFKLSIGAACRLIWPLDRLIVQVLDSTDP  
TIMEMV  
STECGWATKGINIKCERRDNRNGYKAGALKQGMRSYVKTCTYIAIFDADFQPEPDYLERTVPFLIHNPEL  
ALVQARW  
KFNNAKCLMTRMQEMSLNYHFTAQESGSTRHAFFGFNGTAGVWRLAAMEEAGGWKDRTTVEDMDLAVRVGL  
H  
GWKFVFNVDVSKSELPSQFKAFRFQQRWVSCGPANLFRKMTMEIIRNKRVTIWKKLYVIYSFFFVRKI  
IVHFTFFFYCF

ILPTSVFFPEVNIPTWSTVYFPMITLNFNAIATPRSFYLIVFWVLFENVMMAMHRTKGTFIGLLEGGRVNEWVVTEKLGDA  
LETKLLPQVRKPRNGFLERINSKEMMVGIYILCCASYNLVFGKTVLYIYLYMQALAFIAGIGFIGT

>AT5G22740\_CsIA2MDGVSPKFLPETFDGVRMEITGQLGMIWELVKAPVIVPLLQLAVYICLLMSVMMLLCERVYMG  
VIVLVKLFWKKPKDRYKFEPIHDDEELGSSNFPVVLVQIPMFNEREVYKLSIGAACGLSWPSDRLLVIQVLDSDPTVKQ  
MVEVECQRWASKGINIRYQIRENRVGYKAGALKEGLKRSYVKHCEYVVFDAADFQPEPDFLRRSIPFLMHNPNIALVQA  
RWRVNSDECLTRMQEMSLDYHFTVEQEVGSSTHAFFGFNGTAGIWRIAAINEAGGWKDRTTVEDMDLAVRASLR  
GWKFLYLGLDQVKSSELPSTFRFRFQQHRWSCGPANLFRKMVMEIVRNKKVRFWKKVYVIYSSFFVFRKIIAHWVTF  
YCVVLPILTILVPEVKVPIWGSVYIPIIILNSVGTPRSIIHLFYWILFENVMSLHRTKATLIGLFEAGRANWVVTAKLGS  
QSAKGNTKGIKRFPRIKLPDRLNTELGFAAFLVCGCYDFVHGKNNYFIYFLQTMSFFISGLGWIGTYVPS

>AT2G32530\_CsIB1MADSSSLPPLCEKISYKNYFLRVVDTLILGLFSLLLYRILLMNQNSVWVVAFLCESFFSFIWLLI  
TSIKWSPASYKSYPERLDERVHDLPSVDMFVTTADPVREPPILVANTLLSLLAVNYPANKLACYVSDDGCSPLTYFSLKEA  
SKFAKIWVPFCKKYNIKVRAPFRYFLNPPAATESSEFSKDWEITKREYEKLSRRVEDATGDSHWLDAEDDFEDFSNTKPN  
DHSTIVKVVWENKGGVGVENEVPHFVYISREKRPNYLHHYKAGAMNFLVRVSGLMTNAPYMLNVDCDMYANEADV  
VRQAMCIFLQKSMNSNHCAFVQFPQEFYDSNADELTVLQSYLGRGIAGIQGPTYAGSGCFHTRRVMYGLSIDDLEDDG  
SLSSLATRKYLAEENLAREFGNSNEMVTSVVEALQRKPNPQNTLANSLAAQEVGHCHFEYQTSWGKTIGWLYESTAE  
DANTSIGIHSRGWTSSYISPKPPAFLGAMPPGGPEAMLQRRWATGLLEVLFNKQSPLIGMFCRKIRFRQSLAYLYIFT  
WGLRSIPELIYCLLPAYCLLHNAALFPKGVYLGIVVTLVGMHCLYSLWEFMSLGFVQSWFASQSFWRIKTTCSWLFSIP  
DIILKLLGISKTVFIVTKKTMPTKMSGSGSEKQREVDPCPNQDSGKFEFDGSLYFLPGTFILLVNLAAAGCSVGLQRHRG  
GGSGLAECGCILVVILFLPFLKGMFEKGYGIPWSTLSKAAFLAVLFFVFSVGN

>AT2G32540\_CsIB2MAESSPLPLCERISHKSYFLRAVDLTLGLLLSLLYRILHVNQKDTVWIVAFLCETCFTFVWLLIT  
NIKWSPADYKTYPERLDERVHELPPVDMFVTTADPVREPPILVNTVLSLLAVNYPANKLACYVSDDGCSPLTYFSLKEA  
SKFAKIWVPFCKKYNVRVRAPFRMYFRNSPEAAEGSEFSKDWEMTKREYEKLSQKVEDATGSSHWLDAEDDFEAFNLT  
SNDHSTIVKVVWENKGGVGVDEKEVPHVYISREKRPNHFHYYKAGAMNFLVRVSGLMTNAPYMLNVDCDMYVNEA  
DVVRQAMCIFLQKSMDSNHCAFVQYQDFYDSNVGELTVLQLYLGRGIAGIQGPQYAGSGCFHTRRVMYGLSDDL  
DDGSLSSIATRKYLAESLTREFGNSKEMVKSVDALQRKPFQKLNKDSLETAQEMGHCHYEYQTSWGKNIGWLYDS  
TTEDVNTSIGIHSRGWTSSYIFDPPAFLGCMPPQGGPEVMVQRRWATGLLEILFNKQSPLIGMFCRKIRFRQSLAYLY  
VFSWGLRSIPELIFYCLLPAYCLLHNSALFPKGVYLGIIITLVGIHCLYTLWEFMNLGFSIQSWYVTQSFGRIKTTCSWLFSV  
DVILKLLGISKTVFIVTKKTMPEKSGSGSKSQREVDPCPNQDSGKFEFDGSLYFLPGTFIVLVNLAAAGCLVGLQSRGG  
GGSGLAECGCILVVILFLPFLKGMFEKGYGIPFSTLSKAAFLAALFVLSVGN

>AT2G32610\_CsIB3MADSSFLPPLCERISYTNFLRAVYTLVGLFFSLLLHRIRHTSEYDNVWLVAFFCESCFFLVCLLIT  
CLKWSPADTKPFPDRLDERVHDLPSVDMFVPTADPVREPPIMVVDVLSLLAVNYPANKLACYVSDDGCSPLTYFSLKE  
ASKFAKIWVPFCKKYNTRVRAPSRFLKPISVATEDYEFNRDWEKTKREYEKLRKVEDATGDSHMLDVEDDFEAFSNT  
KPNHSTLVKVVWENKGGVGVDEKEIPHIIYISREKRPNYVHNQKCGAMNFLARVSGLMTNAPYILNVDCDMYANDAD  
VVRQAMCILLQESLNMKHCAFVQFRQEFYDSSTELIVVLQSHLGRGIAGIQGPIYIGSGCVHTRRVMYGLSPDDFEVDG  
SLSSVATREFLVKDSLARRFGNSKEMMKSVDIAIQRNPNPQNILNLSIEAAAREVGHCHQYEQYQTSWGNTIGWLYDSVAE  
DLNTSIGIHSRGWTSSYISPDTPAFLGSMPPAGVPEALLQRRWATGWIEILFNKQSPLRGLFSKIRFRQRLAYLCITCLR  
SIPELIYCLLPAYCLLHNSLTFPKGLYLGITVTLVGIHCLYTLWEFMSLGSVQSWLVSQSVWRIVATSSWLFSIFDITLKL  
ISETVFIITKKTAVGATKSALGSGPSQGEDVGPNSDLKFEFDGSLCFLPGTFIVLVNIAALAVFSVGLQRSSYSHEGGGSG  
AEACGCVLVMMLFLPFLMGLFKKGYGTPLSTLSIAGFLAVLFFVFSV

>AT2G32620\_CsIB4MADSSCSLPLYENISYKSYILRAVDLTILGLLFSLLLHRILYMSQNGIWLVAFLCESCFVWLLST  
CTKWSPAETKYPDRDLDERVYDLPSVDMFVPTADPVREPPIMVVNTVLSLLAVNYPANKLACYVSDDGCSPLTYFSLKE  
ASKFAKIWVPFCKKYNLKVRAFPRYFLNPFAAATEGSEFSRDWEMTKREYEKLCRKVEDATGDSHLLGTDNELEAFSNTK  
PNDHSTIIKVVWENKGGVGDKEVPHIVYISREKRPNYLHHYKAGAMNFLARVSGLMTNAPYMLNVDCDMYANEAD  
VVRQAMCIFLQKSQNQHCAFVQFPQEFYDSNTIKLTVIKSYMGRGIAGIQGPINVGSGCFHSRRVMYGLSPDELEDN  
GSLSSVATRELLAEDSLSSGFGNSKEMVTSVVEALQRKPNPQNILTNSIEAAQEVGHCDYESQTSWGKTIGWLYDSMSE  
DMNTSIGIHSRGWTSSYIAPDPPAFLGSMPPGGLEAMIQRRWATGSIEVFNKQSPLLGLFCRKLFRQRVAYLCSVIC  
VRSIPELIYCLLPAYCLLHNSALFPKGLCLGITMMLAGMHCLYTLWEFMCLGHSIQSWYVSQSFWRIVATSSWLFSIFDIIL  
KLLGLSKNVFLVSKKTMVETMSGSGIGPSQREDDGPNNGKTEFDGSLYFLPGTFIVLVNLAALVGVFVGLQRSSSYSHGG  
GGGSLGEACACILVVMLFFPFLKGLFAKGGYIPLSTLSKAGFLAVSFVVFVSVGN

>AT4G15290\_CsIB5MADSSSLHPLCERISHKSYVLRVDLTILGLLYSLLLYRILHISENDNVWLLAFFCESCFSLVWLIFT  
CLKWSPAEDIPYINTLNERVHDLPSLDMFVPTADTVRESPIITVNTVLSLLAVNYPANKLACYVSDDGCSPLTYFSLKEASK  
FVKIWAPFCKKYNVRVRAPFRYFLNPLVATDDSVFSKDWKMMKREYVKLCRKVEDATGDSHWLDADDDFEAFSNTKP  
NDHSTIVKVVWENKGGVGDKEVPHLVYISREKRPNYLHHYKTGAMNFLRVSGLMTNAPYTLNVDCDMYANEPDV  
VRQAMCVFLQNSKNSNHCAFVQFPQKFYDSYTNELAVLQSIILGRGVAGIQGPFYIGTGCFHTRRVMYGLSSDDLEDNG  
NISQVATREFLAEDSLVRKYGNSKELVKSVDALQRKSNPQKSLANLIEAAQEVGHCHYEYQTSWGNLGMWYDSVAE  
DINTSVGIHLRGWTSSFISPDPPAFIGSTPTLGLAIVQRRWATGAIEVFNKQSPFMGMFHGKIKFRQLAYFWALM  
CLRSIPELIYCLLPAYCLLHNSALFPKGPCLCTIVTLVGMHCLYSLWQFMSLGFVSQSWYVVQSLWRIIATSSWLFSIQDIIL  
KLLGISQIGFVIAKKTIPETKSVYESKPSQGEDDVPKLNLGKFEFDSSGLFIPGTFFIMLVNLAALAGYLVRQLRSSCSHGGG  
GSGLAEACGCILVVMLFLPFLKGLFEHKGYSIPLSTLSKAAFLTFLVFFFCVVK

>AT4G15320\_CsIB6MADSSSLPLCERISHKSYLRVDLTILVLLFSLWYRILHMCENNTIWLVAFLCESCFMFWLIIT  
CIKWSPAEDKYPNRLDERVHDLPSVDMFVPTADPVREPIIVVNTVLSLLAVNYPANKLACYVSDDGCSPLTYFSLKEA  
SKFVKIWAPFCKKYNVRVRAPFRYFLNPLVATDDSVFSKDWKMMKIYKVFYVYFCINMKREYVKLCRKVEDATGDSH  
WLDADDDFEAFSNTKPNDHSTIVKVLKFLKTTVRVQFSKVMYILKLIIVVWENKGGVGDKEVPHLVYISREKRPN  
YLHHYKTGAMNFLVNDFYTLHLSFFDILIYKINVND CRAVSFCYDKNMMSLIYNFKQLRVSGLMTNAPYMLNVDCD  
MYANEPDVVRQAMCVFLQNSKNSNHCAFVQFPQNFYDSYTNELVVLQHYMKRGVAGIQGPIYIGSGCFHTRRVMYG  
LSSDDLEDDGSLSSVASREFLEDSLVRKYGSSKELVKSVDALQRKSNPQKSLANLVEAAQEVGHCHYEYQTSWGNL  
WLYDSVAEDTNTSIGIHLRGWTSSFISPDPPAFLGSTPSVGPVPEAIVQHRRWATGSIEVFNKQSPFLIGFRRKIKFRQLAYF  
WVLMCIRSIPELVYCLLPAYCLLHNSALFPKGPCLGIIVTLVGMHCLYTLWQFMILGFVSVCWLFQDIILKLLGISKIGFI  
VAKKNMPETRSYGYESKPSQGEDDGLKLELAGFLVRLQRSSSYSHGGGGGSALAETCGCAMIVFGENDGSQEGLELPK  
LNSKRGISSIVEKTFVACILPFVRNHKVNEKKNHHINIDRPNLL

>AT2G24630\_CsIC8MAPRFDSDWLAKETRRGTPVVVKMENPNYSIVEVEEPDSAFQPMESRKGNAKQVTWVLLL  
KAHKAVGCLTWVATVFWSLGSKRRLSFTHPLGSERLGRDGLVFSAILKFLVASLAILAFELVAYYRGWHYFKNPNLHI  
PTSKEIQSLLHLFYVWLSLRADYIAPPIKALSFCIVLFLVQSVDRILCLGCLWIKFKKIKPRIDEEHFRNDDFEGSGSEYP  
MVLVQIPMCNEREVYEQSISAVCQLDWPDRLLVQVLDSDDESIEQELIRDEVTKWSQKGVNIYRHRLVRTGYKAGNL  
KSAMSCDYVEAYEFVAIFDADFQPNDFLKLTPHFKEKPELGLVQARWAFVNKDENLLTRLQNLNLCFHFEVEEQVN  
GVFLNFFGFNGTAGVWRKALEESGGWLERTTVEDMDIAVRAHLHGWKFIYLVNDVKVLCVPESEYAYKKQHRWHS  
GPMQLFRLCLRSILTSKIAMWKKANLILLFLLRKLILPFYSFTLFCVILPITMFVPEAELPIWVICYVPIFMSLLNILPAPKSPF  
FIVPYLLFENTMSVTKFNAMVSGLFQLGSSYEWIVTKKAGRSSEDLALTDKESEKMPNQILRGVSDSELLEISQVEEQK  
KQPVSVKTKNIKIFHKELALAFLLLTAAVRSLLASQGVHFFYLLFQGLTFLLVGLDLIGEOMS



>AT3G07330\_CsIC6MSRSQNEEFQQWWNKQRDRNNHDVLYAGDDEAFLTVEIRTPATVDPDKDRIRTRTVRQLSRL  
YLLKFKQLASSFLWIGNSFLYLVRTANRRIANDNPPSVSSSARLYRLIKGFLVWWWLLLCFELAAAYFKGWHFTPPSVASAEV  
AVEVYAWWLEIRASYLAPPLQSLTNVCIVLFLIQSVDRLLVLGCFWIKLRRIPVASMAYPTKLVGEGVRLEDYPMVIV  
QIPMCNEKEVYQQSIGAVCMLDWPRERMLVQVLDSDSELDVQQLIKAEVQKWQQRGVRIVYRHLIRTYGKAGNLK  
AAMNCEYVKDYEFVAIFDADFQPPADFLKKTVPHPFKGNEELALVQTRWAFVNKDENLLTRLQINILSFHFEVEQQVNG  
VFINFFGFNGTAGVWRIKALEDCGGWLERTTVEDMDIAVRAHLGCGWKFYIYLVKCLCELPESYEAYKKQQYRWHS  
PMQLFRLCFFDILRSKVSAAKKANMIFLFFLLRKLILPFYSFTLFCVILPLTMFFPEANLPSWVVCYIPGIMSILNIIPAPRSFP  
FIVPYLLFENTMSVTKFGAMISGLFKFDSSYEWVVTKKLGRSSEADLVAYAESGSLVESTTIQRSSSDSGLTELSKLGAAK  
AGKTKRNRLYRTEIALAFILLAASVRSLLSAQGIHFYFLLFQGITFVIVGLDLIGEVS

>AT3G28180\_CsIC4MAPNSVAVTMEKPDNFSLEINGSDPSSFPDKRKSISPKQFSWFLLLKAHRLISCLSWLVSSVKKR  
IAFSAKNINEEDPKSRGKQMYRFIKACLVISIALSIEIVAHFKKWNLDLINRPSWEVYGLVEWSYMAWLSFRSDYIAPLV  
ISLSRFACTVLIQSLDRLVLCGCFWIKFKKIEPKLTEESIDLEDPSFPMVLIQIPMCNEREVYEQSIGAASQLDWPDKRILI  
QVLDSDDPNLQLLIKEEVSVAEKGVNIYRHLIRTYGKAGNLKSAMTCDYVKDYEFVTIFDADFTPNPDLKKTVPHP  
FKGNPELGLVQARWSFVNKDENLLTRLQINILCFHFEVEQQVNGVFLNFFGFNGTAGVWRIKALEESGGWLERTTVE  
DMDIAVRAHLNGWKFYIYLVNDEVTCELPESYEAYKKQHRWHS GPMQLFRLCLPSIISKISVWKKANLIFLFFLLRKLIL  
PFYSFTLFCIILPLTMFIPEAELPLWIIICYVPIFISLLNILPSPKSFPLVPYLLFENTMSITKFNAMISGLFQFGSAYEWVVTKK  
TGRSSEDLAFAEKEEKLHRRNSESGLLELSKLEQETNLVGQETVKKSLGGLMRPKNKKKTNMVFKKELGLAFLLLTAA  
ARSFLSAHGLHFYFLLFQGLSFLVVGLDLIGEVS

>AT4G07960\_CsIC12MAPKFEWWAKGNNNNTRKGTVPVVKMENPNNWSMVELESPSHDDFLVRTHEKSRNKNA  
RQLTWVLLLKAHRAAGCLTSLGSALFALGTAVRRRIAAGRTDIEISSGVGSLQKQNHKKSKLFYSCLKVFLWLSLILLGF  
EIAAYFKGWSFGTSKLQQLQFIFNKGFFDWVYTRWVLLRVEYLAPPLQFLANGCIVLFLVQSLDRLILCLGCFWIRFKKIPV  
PKPDSISDLESGDNGAFLPMVLVQIPMCNEKEVYQQSIAAVCNLDWPKGKILIQILDDSDDPITQSLIKEEVHKWQKLG  
RIVYRHRVNRREGYKAGNLKSAMNCSYVKDYEFVAIFDADFQPLPDLKKTIPHKDNEEIGLVQARWSFVNKEENLLTRL  
QNINLAFHFEVEQQVNSVFLNFFGFNGTAGVWRIKALEDSGGWLERTTVEDMDIAVRAHLHGWFVFLNDEVCQCEL  
PESYEAYRQKQHRWHS GPMQLFRLCLPAVSKISIGKFNILFLLRKLILPFYSFTLFCIILPMTMFVPEAELPAWVVC  
YIPATMSFLNILPAPKSFPIVYLLFENTMSVTKFNAMVSGLFQLSAYEWVVTKKSGRSSEGLAALVEKDEKTTKHQ  
RGVSAPETEAEKKAETKRKKKHNRIYMKELSLAFLLTAATRSLLSAQGIHFYFLLFQGISFLLVGLDLIGEVS

>AT4G31590\_CsIC5MAPRLDFSDWWAKDTRKGTVPVVKMENPNYSVVEIDGPDFAFRPVEKSRGKNAKQVTWVLL  
LKAHRAVGCLTWLATVFWLLGAIKKRSLFTHPLGSEKLRDRWLFTAIFLAVSLVILGFEIVAYFRGWYHFQSPSLHIP  
TSTLEIQSLFHLVYVWGLTLRADIYIAPPIKALSFCIVLFLIQSVDRLLVLCGCFWIKYKIKIPRFDEEPRNDDAEGSGSEYP  
MVLVQIPMCNEREVYEQSISAVCQLDWPDKRILVQVLDSDNDESIQQLIKAEVAKWSQKGVNIYRHLIRTYGKAGN  
LKSAMSCDYVEAYEYVAIFDADFQPTPDLKLTVPHPKDNPELGLVQARWTFVNKDENLLTRLQINILCFHFEVEQQVN  
GVFLNFFGFNGTAGVWRIKALEESGGWLERTTVEDMDIAVRAHLHGWKFYIYLVKLVCEVPESYEAYKKQHRWHS  
GPMQLFRLCLGSILTSKIAIWKANLILFFLLRKLILPFYSFTLFCIILPLTMFVPEAELPVVICIYIPVMSFLNLLPSPKSF  
FIVPYLLFENTMSVTKFNAMVSGLFQLSYEWVVTKKAGRSESDLLSITEKETPTKKSQLLRGVSDSELLELSQLEEQQ  
AVSKKPVKKTNKIYHKEALAFLLTAALRSLLAAQGVHFYFLLFQGVTFLLVGLDLIGEVS

>AT1G02730\_CsID5MVKSAASQSPVTTITVTPCKGSGDRSLGLTSPIPRASVITNQNSPLSSRATRRTSISGNRRSNG  
DEGRYCSMSVEDLTAETTNSCVLSYTVHIPPTPDHQTTFASQSEEDMLKGNSNQKSFSGTIFTGGFKSVTRGHVID  
CSMDRADPEKKSQICWLKGCDEKVVHGRCECGFRICRDCYFDCITSGGGNCPGCKEYRDINDDPETEEDEEDEAK

PLPQMGESKLDKRLSVVKSFKAQNOAGDFDTRWLFETKGTGYGNAVWPKDGYGIGSGGGGNGYETPPEFGERSK  
RPLTRKVSVAIIISPYRLLIALRLVALGLFTWRVRHPNREAMWLWGMSTTCELWFALSWLLDQLPKLCPVNRDLTG  
VLKERFESPNLRNPKGRSDLPGIDVVFVSTADPEKEPPLVTANTILSILAVDYPVEKLACYLSDDDGALLTFEALAQTASFAS  
TWVFPFCRKHNIERNPEAYFGQKRNFLKNKVRDLFVRERRRRVKREYDEFKVRINSLPEAIRRRSDAYNVHEELRAKKKQ  
MEMMMGNNPQETVIVPKATWMSDGSHPGTWSSGETDNSRGDHAGIIQAMLAPPNAEPVYGAEDAENLIDTT  
DVDIRLPMVLVYSREKRPGYDHNKKAGAMNALVRTSAIMSNGPFILNLDCDHYYNSMALREGMCFMLDRGGDRICY  
VQFPQRFEGIDPNDRYANHNTVFFDVSMRALDGLQGPMYVGTGCIFRRTALYGFSPPRATEHHGWLGRRKVKISLRR  
PKAMMKKDDVSLPINGEYNEEENDDGDIESLLLPRFGNSNSFVASIPVAEYQGRLIQDLQGGKNSRPAGSLAVPRE  
PLDAATVAEAVISCFYEDKTEWGRVGVWYGSVTEDEVVTGYRMHNRGWRSIYCVTKRDAFRGTAPINLTDRLHQVL  
RWATGSVEIFFSRNNAIFATRRMKFLQRVAYFNVGMYPFTSLFLIVYCILPAISLFSGQFIVQSLDITFLIYLLSITLTLCLMLSL  
LEIKWSGITLHEWWRNEQFWVIGGTSAPAAVLQGLLKIAGVDISFTLTSKSSAPEDGDDEFADLYVVKWSFLMVPPL  
TIMMVNMAIAVGLARTLYSPFPQWSKLVGGVFFSFWVLCHLYPFAKGLMGRRRGRVPTIVFVWSGLLSIIVSLLWVYIN  
PPSGKQDYMQFQFP

>AT1G32180\_CsID6MMMDGESPLRHPRISHVSNSSGDFGSSSDYNKYLVQIPPTPDNNPGPASLSIVLLEIDSNQESVPS  
VSGDIVSGSSGKDNEDLTDVIRINVGEEEEEDTLLSKISYSLTRVVKISPIIIALYRILIVRVVSLALFLFWRIRNPNKALW  
LWLLSVICELWFAFSWLLDQIPKLFVNHATDIEALKATFETPNPDNPTGKSDLPGIDVVFVSTADAEKEPPLVTANTILSIL  
SVDYPVEKLSVYISDDGGSLVTFEIAIEAASFAKIWVFPFCRKHKIEPRNPESYFGLKRDYKDKVRHDFVRERRYVKRAYD  
EFKVRVNALPHSIRRRSDAFNSKEEIKALEKWKHWKVKVEEDQIKEPRPALVAPKATWMSDGTWHPGTWAVSGPHH  
SRGDHASVIQVLLDPPGDEPVEGKGGEGRALDLEGVDIRLPMVLVYSREKRPGYDHNKKAGAMNALVRASAIMSNGP  
FILNLDCDHVYNSRAFRDGCIFMMDHDGDRVSYVQFPQRFEGIDPSDRYANKNTVFFDINLRALDGIQGPYVGTG  
CLFRRTALYGFNPPDVVFVEEPPSGSYCFPLIKKRSPTVASEPEYTTDEEDRFDIGLIRKQFGSSSMLVNSVKVAEFEGRP  
LATVHSSRLGRPPGSLTGSRKPLDFATVNEAVNVISCWYEDKTEWGFNVGVWYGSVTEDEVVTGFRMHKEGWRSFYCV  
TEPDAFRGSAPINLTDRLHQVLRWATGSVEIFFSRNNAIFAGPKLKLQRIAYLNVGIYPFTSIFILTYCFPLPLSFGHFVV  
ETLTGSFLIYLLIITLSLCLAVLEVKWSGISLEEWWRNEQFWLIGGTSAPAAVLQGLLKIAGVEISFTLTSKSSSTGGDDE  
DDEFADLYLFWTALMIPPLTIIILNVAIFAVCRTVFSANPQWSNLLGGTFFASWVLLHMYPFAKGLMGRGGKPTPV  
YVWSGLIAICLSLLYITIKNSEIDGGSFMLV

>AT2G33100\_CsID1MASSPPKTLNSQSSLSRPPQAVKFRRTSSGRIVLSRDDDMDVSGDYSGQNDYINYTVLM  
PPTPDNQPAGSSGSTSESKGDANRGGGGDGPKMGNKLERRLSVMKSNNKSMLLRSQTGDFDHNRLWFESKGYGI  
GNAFWSEEDDYDGGVSKSDFLDKPKWPLTRKVIQIPAKILSPYRLLIVIRLVVFFLWWRITNPEDAMWLWGLSIVC  
EIWFASFWILDILPKLNPNRATDLAALHDKFEQSPSNPTGRSDLPGVDVVFVSTADPEKEPPLVTANTLLSILAVDYPKIEKL  
SAYISDDGGAILTFEAMAEAVRFAEYWVFPFCRKHDIERNPDSYFSIKKDPTKNKKRQDFVKDRRWIKREYDEFKVRING  
LPEQIKKRAEQFNMREELKEKRIAREKNGGVLPPDGVVVKATWMADGTHWPGTWFEKPDHSGGDHAGILQIMSK  
VPDLEPVMGGPNEGALDFTGIDIRVPMFAYVSREKRPGFDHNKKAGAMNGMVRASAILSNGAFILNLDCDHYYNSK  
AIKEGMCFMMDRGGDRICYIQFPQRFEGIDPSDRYANHNTVFFDGNMRALDGLQGPVYVGTGCMFRRYALYGFNPP  
RANEYSVGFVQEKAPAMHVRTQSASQTSQASDLESQTPLNDDPDLGLPKKFGNSTMFTDTIPVAEYQGRPLADH  
MSVKNRPPGALLPRPPLDAPTVAEIAIVISCWYEDNTEWGDGRIGWYGSVTEDEVVTGYRMHNRGWRSVYCITKRD  
AFRGTAPINLTDRLHQVLRWATGSVEIFFSKNNAMFATRRMKFLQRVAYLNVGIYPFTSIFLVVYCFPLALCLFSGKFIVQS  
LDIHFLSYLLCITVTLTLISLLEVKWSGIGLEEWWRNEQFWLIGGTSAPAAVLQGLLKIAGIEISFTLTSKASGEDEDDIF  
ADLYIVKWTGLFIMPLTIIIVNLVAIVIGASRTIYSVIPQWGKLMGGIFFSLWVLTHTMYPFAKGLMGRRGKVPPTIVYVWS  
GLVSITVSLWITISPPDDVSGSGGISV

>AT3G03050\_CsID3MASNNHFMNSRNLSTNSDAAEAERHQQPVSNSVTFARRTPSGRYVNYSRDDLDELGSVDL  
TGYSVHIPPTPDNQPMDPSSISQKVEEQYVNSLFTGGFNSVTRAHLMEKVIDTETSHPMAGAKGSSCAVPGCDVKV  
MSDERGQDLLPCECDFKICRDCFM DAVKTGGMCPGCKEYRNTDLADFADNNKQQRPMPLPPPAGGSKMDRRLSLM  
KSTKSGLMRSQTGDFDHNRLWFETSGTYGFGNAFWTKDGNFGSDKDGNGHGMGPQDLMSRPWRPLTRKLIQIPAA  
VISPYRLILIRIVLALFLMWRIKHKNPDAIWLWGMSSVCELWFALSWLLDQLPKLCPINRATDLNVLKEKFETPTPSNP  
TGKSDLPLGLDMFVSTADPEKEPPLVTSNTILSILAADYPVEKLACYVSDDGALLTFEAMAEAAAFANMWVPPFCRKHNI  
EPRNPDSYFSLKRDPYKNKVKADFVKDRRRVKREYDEFKVRINSLPDSIRRRSDAYHAREEIKAMKLQRQRNDEEIVEPV  
KIPKATWMADGTHWPGTWINSKPDHRSRSDHAGIIQVMLKPPSDEPLHGVSEGFLLDLDVDIRLPLLVYSREKRPYD  
HNKKAGAMNALVRASAIMSNGPFILNDCDHYIYNSQALREGMCFMMDRGGDRLCYVQFPQRFEGIDPSDRYANHN  
TVFFDVNMRALDGLMGPVYVGTGCLFRRIALYGFDPRAKEHHPGFSCCFSRKKKSRVPEENRSLRMGGDSDDDEE  
MNLKSLVPKFGNSTFLIDSIPVAEFQGRPLADHPAVQNGRPPGALTIPRELLDASTVAEIAIVISCWYEDKTEWGSRIGW  
IYGSVTEDEVVTGYRMHNRGWKSVYCVTKRDAFRGTAPINLTDRLHQVLRWATGSVEIFFSRNNAFFASPRMKILQRIAY  
LNVGIYPFTSFFLIVYCFPLALSFLSGQFIVQTLNVTFVYLLIISITLCLLALLEIKWSGISLEEWWRNEQFWLIGGTS AHLAA  
VIQGLLKVVAGIEISFTLTSKSGGEDVDDEFADLYIVKWTSLMIPPITIMMVNLI AIAVGF SRTIYSVIPQWSKLIGGVFFSF  
WVLAHLYPFAKGLMGRRGRTP TIVYVWVWGLVAITISLLWVAINPPAGSTQIGGSFTFP

>AT4G38190\_CsID4MASTPPQTSKKVRNNSGSGQTVKFARRTSSGRYVLSLRDNIELSGELSGDYSNYTVHIPPTPDN  
QPMATKAEEQYVNSLFTGGFNSVTRAHLMKVIDSDVTHPQMAGAKGSSCAMPACDGNVMKDERGKDVMPCEC  
RFKICRDCFM DAQKETGLCPGCKEYKIGDLDDDDTPDYSSGALPLPAPGKDQRGNNNNMSMMKRNQNGEFDHNR  
WLFETQGTGYGNAYWPQDEMYGDDMDEGMRGGMVETADKPWRPLSRRIPAAIISPYRLIVIRFVVLCCFLTWRI  
RNPNEAIWLWLMSSICELWFGFSWILDQIPKLCPINRSTDLEVL RDKFDMPSNPTGRSDLPGIDL FVSTADPEKEPPL  
VTANTILSILAADYPVEKVCYLSDDGGALLSFEAMAEAAAFADLWVPPFCRKHNI EPRNPDSYFSLKIDPTKNKRIDFK  
DRRKIKREYDEFKVRINGLPDSIRRRSDAFNAREEMKALKQMRESGGDPTEPVKVPKATWMADGTHWPGTWAATR  
EHSKGDHAGILQVMLKPPSSDPLIGNSDDKVIDFSDDTRLP MFVYSREKRPYDHNKKAGAMNALVRASAILSNGP  
FILNDCDHYIYNCKAVREGMCFMMDRGGEDICYIQFPQRFEGIDPSDRYANNNTVFFDGNMRALDGVQGPVYVGT  
GTMFRRFALYGFDPNPDKLLEKESETEALTTSDFDPLDVTQLPKRFGNSTLLAESIPIAEFQGRPLADHPAVKYGRPP  
GALRVPRLDPLDATTVAESVVISCWYEDKTEWGD RVGWYGSVTEDEVVTGYRMHNRGWRVSYCITKRDSFRGSAPIN  
LTDRLHQVLRWATGSVEIFFSRNNAIASKRLKFLQRLAYLNVGIYPFTSFLILYCFPLAFSLFGQFIVRTLSISFLVLLMIT  
ICLIGLAVLEVKWSGIGLEEWWRNEQWWLISGTS SHLYAVVQGVLVKVIAGIEISFTLTTKSGGDDNEDIYADLYIVKWSL  
MIPPVIVAMVNIIAIVVAFIRTIYQAVPQWSKLIGGAFFSFVWVLAHLYPFAKGLMGRRGKTPTIVFVWAGLIAITISLLWTA  
INPNTGPAAAAEGVGGGGFQFP

>AT1G55850\_CsIE1MVNKDDRIRPVHEADGEPLFETRRRTGRVIAIRFFSASVFCICLIWFYRIGEIGNRNTVLDRLIW  
FVMFIVEIWFGLYWVVTQSSRWNPVWRFPFSDRLSRRYGS DLPRLDVFCTADPVI EPPLLVVNTVLSVTALDYPPEKL  
AVYLSDDGGSELTFYALTEAAEFAKTWVPFCKKFNVEPTSPAAYLSSKANCLDSAAEEVAKLYREMAARIETAARLGRIFE  
EARVKYGDGFSQWDADATRNRHGTILQVLVDGREGNTIAIPTLVYLSREKRPQH HNFKAGAMNALLRVSSKITCGKII  
LNLDCDMYANNSKSTRDALCILLDEKEGKEIAFVQFPQCFDNVTRNDLYGSMMRVGIDVEFLGLDGNNGPLYIGTGCF  
HRRDVICGRKYGEEEEEEESERIHENLEPEMIKALASCTYEENTQWGKEMGVKYGCPVEDVITGLTIQCRGWKSAYLNP  
EKQAFGLVAPTNLHQMLVQRRWSEGDFQIMLSKYSVWYWGKISLGLILGYCCYCLWAPSSLPVLIYSVLTSLCLFKG  
IPLFPKVSSWFIPFGYVTAATAYSLAEFLWCGGTFRGWVNEQRMWLYRRTSSFLFGFMDTIKLLGVSESAFVITAK  
VAEEEAERYKEEVM EFGVESPMFLVLGTLGMLNLFCAA VARLVSGDGGDLKTMGMQFVITGVLVWINWPLYKG  
MLLRQDKGKMPMSVTVKSVVLALSACTCLAF

>AT4G23990\_CsIG1MEPHRKHSVGD TTLHTCHPCRRTIPYRIYAVFHTCGIIALMYHHVHSLLTANTTLITSLLLSDIVL  
AFMWATTTSLRYKPVRRTEYPEKYAAEPEDFPKLDVFICTADPYKEPPMMVVNTALSVMAYEYPSDKISVYVSDDGSS  
LTLFALMEAAKFSKHWLPFCKNNVQDRSPEVYFSSKLSRSDEAENIKMMYEDMKSRVEHVESGKVETA FITCDQF  
RGVFDLWTDKFRHDHPTIIQVLQNSENDMDDTKKYIMP NLIYVSREKSKVSSHFKAGALNTLLRVSGVMTNSPIILTL  
DCDMYSNDPATPVRALCYLTDPKIKTGLGFVQFPQT FQGISKNDIYACAYKRLFEINMIGFDGLMGP NHVGTGCFNRR  
GFY GAPS NLILPEIDELKPNRIVDKPINAQDVLALAH RVAGCIYELNTNWGSKIGFRYGLVEDYYTGYRLHCEGWRSVFC  
RPKRAAF CGDSPKSLIDVVSQQKRWAI GLEVAISRYSPITYGVKSMGLVTGVGYCQYACWAFWSLPLIVYGF LPQLALL  
YQSSVFPKSSDPWF WLYIVLFLGAYGQDLLDFVLEGGTYGGWWNDQRMWSIRGFSH LFGFIEFTLKT LNLSTHG FNV  
TSKANDDEEQSKRYEKEIFEFGPSSSMFLPLTTVAIVNLLAFVWGLYGLFAWGEGLVLELMLASFAV VNC LPIYEAMVLR I  
DDGKLPKRVC FVAGILTFVLIVSGYVFLK

>AT4G24000\_CsIG2MEPQRKHSTALHTCHPCRRTIPYRIYAVFHTCGIIALMYHHVHSIVNANNTLITCLLLSDIVLAF  
MWATTTSLRLNPIHRTEYPEKYAAKPEDFPKLDVFICTADPYKEPPMMVVNTALSVMAYEYPSHKISVYVSDDGSSLT  
LFALMEAAKFSKHWLPFCKNNNVQDRSPEVYFSSKSHSSSDEAENLKMMYEDMKSRVEHVESGKVETA FIACDQFSC  
VFDLWTDKFRHDHPTIIMVLQHNETEMPNLIYVSREKSKVSPHHFKAGALNTLLRVSAVMTNSPIILTLDCDMYSN  
NPTTPLHALCYLSDPKINF DLGFVQFPQK FQGVNKNDIYASELKRPF DINTVGF DGLMGPVHMGTGCFNRRAFY GPP  
TTLILPEIETFGPNRIADKPIKAQDILALAH DVAGCNYE CNTNWGSKIGFRYGLVEDYFTGFMLHCEGWSIFC SPTKAA  
FYGDSPKCLTDVIGQQIRWSVGLLEVAFSRYNPLTYGIKPLSLLMSLGYCHYAFWPFWCIPLVVYGILPQVALIHGVS VFP  
KASDPWF WLYIILFLGGYAQDLSDFLLEGGTYRKWWNDQRMWMMV RGLSSFFFGFTEFTLKT LNLSTQGYNVTSKSN D  
DNEQMRYEQEIFDFG PSSSMFLPITTVAIMNLLAFMRGLYGIFTWGE GPVLELMLASFAV VNC LPIYEAMVLRIDDGK  
LPKRICFLAGLLSFVLTGSGYFFLK

>AT4G24010\_CsIG3METHRKNSVVGNIHTCHPCRRTIPYRIYAIFHTCGIIALMYHHVHSLVTANNTLITCLLLSDIVL  
AFMWATTTSLRLNPVHRTECPEKYAAKPEDFPKLDVFICTADPYKEPPMMVVNTALSVMAYEYPSDKISVYVSDDGSS  
SLTFFALIEAAKFSKQWLPFCKNNVQDRSPEVYFSSESHRSDEAENLKTNILKCEVEQMMYEDMKSRVEHVESGKV  
ETA FITCDQFRGVFDLWTDKFSRHDHPTIIQVLQNS ETDMDNTRKYIMP NLIYVSREKSKVSPHHFKAGALNTLLRVSGV  
MTNSPIILTLDCDMYSNDPATLVRALCYLTDPEIKSGLGYVQFPQKFLGISKNDIYACENKRLFIINMVGFDGLMGPTHV  
GTGCFNRRAFY GPPYMLILPEINELKPYRIADKSIKAQDVL SLAHNVAGCIYEYNTNWGSKIGFRYGLVEDYYTGFMLH  
CEGWRSVFCNP KKAAYFGDSPKCLVDLVGQQIRWAVGLFEMSFSKYSPIYGIKSLDLLMGLGYCNSPFKPFWSIPLTVY  
GLLPQALISGVSVFPKASDPWF WLYIILFFGAYAQDLSDFLLEGGTYRKWWNDQRMLMIKGLSSFFFGFIEFILKT LNL S  
TPKFNVTSKANDDDEQRKRYEQEIFDFGTSSSMFLPLTTVAIVNLLAFVWGLY GILFCGGELYLELMLV SFAV VNC LPIYG  
AMVLRKDDGKLSKRTCFLAGNLHVGSYCVKLLRPQVTSPLRLIHNNNTSGWFKRKKHNMNESV

>OS02G09930\_OsCsIA1MEVNGGGAAGLPEAWSQVRAPVIVPLLR LAVAVCLTMSVLLFLERMYMAVVISGVKILRR  
RPDRRYRCDPI PDDPELGTSAFPVVL IQIPMFNEREVYQLSIGAVCGLSWPSDRLVVQVLD DSTD PVIKEMVRIECER  
WAHKGVNITYQIRENRKGYKAGALKEGMKHGYVRECEYVAIFDADFQDPDFLRRTIPFLVHNSDIALVQARWR FVNA  
DECLMTRMQEMSLDYHFTVEQEVSSVCAFFGNGTAGVWRV SAVNEAGGWKDRTTVEDMDLAIRASLKGWK FVY  
LGDVQVKSELPSTFKAFRFQQHRWSCGPANLFRKMLMEIKVTIWKKIHVIYNFFLIRKIIAHIVTFAFYCLIIPATIFVPEVRI  
PKWGC VYIPTIITLLNSVGT PRSFHLLFFWILFENVMSLHRTKATLIGLLEAGRAN EWWVTEKLG NALKMKSSSKSSAKKS  
FMRVWDR LNVTELGVA AFLFCGWYDLAFGKD HFFIYLFQGA AFFIVGIGYVGTIVPQS

>DAA01745\_OsCsIA10MEGQWGRWRLAAAAAASSSGDQIAAAWAVVRARAVAPVLQFAVWACMAMSVMLVLE  
VAYMSLVSLVAVKLLRRVPERRYKWEPI TTGSGGVGGGDGEDEEAATGGREAAAFPMVLVQIPMYNEKEVYKLSIGAA

CALTWPPDRIIIQVLDDSTDPAIKDLVELECKDWARKEINIKYEIRDNRKGYKAGALKKGMHEIYTQQCDFVAIFDADFQ  
PESDFLKLTIPFLVHNP KIGLVQTRWEFVNYDVCLMTRIQKMSLDYHFKVEQESGSSMHSFFGFNGKIQQNYLHELFM  
PGPNADLPTGTAGVWRVSAINEAGGWKDRTTVEDMDLAVRASLKGWQFLYVGDIVKSELSTFKAYRHQQHRWT  
CGAANLFRKMXQRKLPKTRQAFNXTEWNMLRDCHAIXFFTRLYVIQGVSVWKKLHLLYSFFFVRRRVVAPILTFLYCYVV  
IPLSVMVPEVSIPVWGMVYIPTAITIMNAIRNPGSIHLMFVILFENVMAMHRMRAALTGLLETMNVNQWVVTEKV  
GDHVKDKLEVPLLEPLKPTDCVERIYIPELMVAFYLLVCASYDLVLGAKHYLYIYLQAFAFIALGFGFAGTSTPCS

>OS08G33740\_OsCsIA11MSSSGGGGVAEEVARLWGELPVRVWVAWAAQWAAAAAARAASVVVPAVRALVAVS  
LAMTVMILAEKLFVAAVCLAVRAFRLRPDRRYKWLPIGAAAAAASSEDDEESGLVAAAAAFPMVLVQIPMFNEREVYK  
LSIGAACSLDWPSDRVVIQVLDDSTDLVVKFVIVYFTDISSRIIRSTSLVIKDLVEKECQKWQGGKGVNIKYEVRGNRKY  
KAGALKEGLKHHDYVKECEYIAMFDADFQ PESDFLLRTPFLVHNSIALVQTRWKFVNANECLLRFQEMSLDYHFKYE  
QEAGSSVYSFFGFNGTAGVWRVIAAIDDAGGWKDRTTVEDMDLAVRATLQGWKFVYVGDVVKSELSTFKAYRFQQ  
HRWSCGPANLFKMMVEILENKKVSFWNKIHLWYDFFVVGKIAAHTVTFIYCFVIVSVWLPEIEIPLWGVVYVPTVIT  
LCKAVGTPSSFHLVILWVLFENVMSLHRIKAAVTGILEAGRVNEWVVTEKLGANKTKPDTNGSDAVKVIDVELTTPILP  
KLKRRTRFWDKYHYSEIFVGCIIILSGFYDVLVYAKKGYIYFLFIQGLAFLVGFYIGVCP

>OS10G26630\_OsCsIA2MSAMLVAEAAWMGLASLAAAAARRLRGYGYRWEPMAAPPDVEAPAPAPAEFPMVLV  
QIPMYNEKEVYKLSIGAACALTWPPDRIIIQVLDDSTDPFVKFLVQELVELECKEWASKKINIKYEVRRNRKGYKAGALR  
KGMHEITYAQLCDFVAIFDADFEPESDFLKTMPLYLLHNP KIALVQTRWEFVNYNVCLMTRIQKMSLDYHFKVEQESG  
FMHAFFGFNGTAGVWRVSAINQSGGWKDRTTVEDMDLAVRASLKGWFLYVGDIVKSELSTFQAYRHQQHRWT  
CGAANLFRKMAWEIITNKEVSMWKKYHLLYSFFFVRRRAIAPILTFLYCIVIPLSAMVPEVTIPVWGLVYIPTAITIMNAIR  
NPGSVHLMFVILFENVMAMHRMRAALSGLLETARANDWVVTEKVGDKDELDPLEPLKPTCAERIYIPELLA  
LYLLICASYDFVLGNHKYIYIYLQAVAFVVMGFGFVGTTRTPCS

>OS06G12460\_OsCsIA3MAMAGADGPTAGAAA VRWRGGESLLLLLWRPSSAELVAAWGAARASAVAPALAAAS  
AACLALSAMLLADAVLMAAACFARRRPDRRYRATPLGAGAGADDDDDDEEAGRVA YPMVLVQIPMYNEREVYKLSIG  
AACGLSWPSDRLIVQVLDDSTDPVTWYDRLRKTIVQQAHPAQADMDVHQSTKRKNKELMTRVPILECDNSHGLAS  
IISSYLIAVGLVELECKSWGNKGNVYEVNRTRKGYKAGALKEGLRDYVQCCNYVAIFDADFQPEPDFLLRTIPYLVRN  
PQIGLVQAHWEFGTAGVWRISALEEAGGWKDRTTVEDMDLAVRAGLKGWKFVYLADVVKSELPSNLKTYRHQQHR  
WTCGAANLFRKVGAEILFTKEVPFWWKFYLLYSFFFVVRKVVAVVPMFLYCVVIPSFLIPEVTPVWGVVYVPTTITLL  
HAIRNTSSIHFIPIFWILFENVMSFHRTKAMFIGLLELGGVNEWVVTEKLGNGSNTK PASQILERPPCRFWDRWTMSEIL  
FSIFLFFCATYNLAYGGDYFVYIYLQAI AFLVVGIGFCGTISSNS

>OS03G07350\_OsCsIA4MEGQWGRWRLAAAAAASSSGDQIAAAWAVVRARAVAPVLQFAVWACMAMSVMLVL  
EVAYMSLVSLVAVKLLRRVPERRYKWEPITGSGGVGGGDEEAAATGGREAAAFPMVLVQIPMYNEKEVYKLSIGA  
ACALTWPPDRIIIQVLDDSTDPAIKDLVELECKDWARKEINIKYEIRDNRKGYKAGALKKGMHEIYTQQCDFVAIFDADF  
QPESDFLKLTIPFLVHNP KIGLVQTRWEFVNYDVCLMTRIQKMSLDYHFKVEQESGSSMHSFFGFNGTAGVWRVSAIN  
EAGGWKDRTTVEDMDLAVRASLKGWQFLYVGDIVKSELSTFKAYRHQQHRWT CGAANLFRKMATEIAKNKGVSV  
WKKLHLLYSFFFVRRRVVAPILTFLYCVVIPSVMVPEVSIPVWGMVYIPTAITIMNAIRNPGSIHLMFVILFENVMAM  
HRMRAALTGLLETMNVNQWVVTEKVG D HVKDKLEVPLLEPLKPTDCVERIYIPELMVAFYLLVCASYDLVLGAKHYLYI  
YLQAFAFIALGFGFAGTSTPCS

>OS03G26050\_OsCsIA5MEAGEAAGAVLFLAAAVSLLAAVSTGALDFTYLTVVGEESSTSPGSGGGAWWREAWV  
GARSRAVAPALQVGVWACMVMSVMLVVEATYNSAVSVAARLVGWRPERWFKWEPLGGGAGAGDEEKGEAAAAA  
YPMVMVQIPMYNELEVYKLSIGAVCGLKWPKERLIQVLDSDTAFIKNLVELECEDWASKGLNIKYATRSGRKGFKAG  
ALKKGMEDYAKQCEYVAIFDADFQPEPDFLLRTPFLMHNQNALVQARWVFNDRVSLLTRIQKTFLDYHFKAQ  
EAGSATFAFFSFNGTAGVWRTEAINDAGGWKDRTTVEDMDLAVRATLKGWKFIYLGDLRVKSELPSTYKAYCRQQFR  
WSCGGANLFRKMIWDVLVAKKVSSLKIIYLYSFFLVRVAVAPAVAFILYNVIIPVSMIPELFLPIWGVAYIPTALLIVTAIR  
NPENLHTVPLWILFESVMSMHLRAAVAGLLQLQEFNQWIVTKKVGNNAFDENNETPLLQKSRKRLINRVNLPEIGLS  
VFLIFCASYNLVHFGKNSFYINLYLQGLAFFLLGLNCVGTLPDHCCF

>AAL25127\_OsCsIA6MQGSSTSILHFVPSDPTSTSVLDFLSPTPRGTSPVHRRRLHAGDLALRAGGDRLLVADTVAADV  
ESLVQAWRQVRMELLVPLLRGAVVACMVMSVIVLAEKVFLGVVSAVVKLLRRRPARLYRCDPVVVEDDDEAGRASP  
MVLVQIPMYNEKEYQLSIGAACRLTWPADRLIVQVLDSDTAIVKELVRKECERWGKGINVKYETRKDRAGYKAGN  
LREGMRRGVYQGEFVAMLDADFQPPDFLLKTPFLVHNPRALVQTRWEFVNANDCLLTRMQEMSMDYHFKE  
QEAGSSLCNFFGYNGTAGVWRRQVIDESGGWEDRTTAEDMDLALRAGLLGWEFVYVGSIKVSELPSTLKAYRSQQH  
RWSCGPALLFKKMFWEILAAKKVSFWKKLYMTYDFFIARRIISTFTFFFSVLLPMKVFFPEVQIPLWELIPIPTAILLHSV  
GTPRSIHLIILWFLFENVMALHRLKATLIGFFEAGRANEWIVTQKLGNIQKLSIVRVTKNCRFKDRFHCLFELFIGGFLTSA  
CYDYLRDDIFYIFLLSQSIYFAIGFEFMGVSVSS

>OS07G43710\_OsCsIA7MVEAGEIGGAAVFALAAAAALSAASSLGAVDFRRPLAAVGGGGAFEDGVPVWLIGVLG  
GGDEAAAGGVSVGVAAWYEVWVRVGGVIAPTLQAVVWCMVMSVMLVVEATFNSAVSLGVKAIGWRPEWRFK  
WEPLAGADEEKGRGEYPMVMVQIPMYNELEVYKLSIGAACELKWPDKLIVQVLDSDTDPFIKNLVELECESWASKGV  
NIKYVTRSSRKGFKAGALKKGMEDYTKQCEYIAIFDADFQPEPNFLLRTPFLMHNPNVALVQARWAFVNDTSSLTR  
VQKMFYDYHFKEQEAGSATFAFFSFNGTAGVWRRTTAINAAGGWKDRTTVEDMDLAVRASLNGWKFIYVGDIVKS  
ELPSTYGAYCRQQFRWACGGANLFRKIAMDVLVAKDISLLKFFMYLYSFFLVRVAVPMVACVLYNIIVPLSVMPELFI  
IWGVAYIPMALLIITIRNPRNLHIMPFWILFESVMTVLRMRAALTGLMELSGFNKWTVTKKIGSSVEDTQVPLPKTRK  
RLRDRINLPEIGFSVFLIFCASYNLIFHGKTSYFFNLYLQGLAFLLGFNFTGNFACQ

>Os09g39920\_  
OsCsIA8MSIMFLERLYMALVVAALWLIRRRRRRSNRREQDDGAENDQLLQDPEAANSPMVLVQIPMFNEKQVYR  
LSIGAACGMTWPSDKLVIQVLDSDTDPAIREMVEGECGRWAGKGVSIYENRRNRSGYKAGAMREGLRKAYARECEL  
VAIFDADFQPDADFLLRTPVLVADPGVALVQARWRVNADECLLRIQEMSLDYHFRVEQEVGSACHGFFGFNGTA  
GVWRVRALEEAGGWKERTTVEDMDLALVAHLLTFSYCVVIPACVLGSDHVRLPKYVALYVPAITLLNAACTPRSCH  
LLIFWILFENVMSMHRKATLIGLLEATRANWVVTDKRGNANPKHQQPANTTTRPGRKTTTSSRSTFFNNDVHVAEI  
LLGACLLYCALYDIAYGRDSFYIYLLLSAAAFIVGFGYVGT

>OS06G42020\_OsCsIA9MWEQVKAPVVVPLRLSVAACLAMSVMLFVEKVYMSVVLVGVHLFGRRPDRRYRCDPIV  
AAGADNDDPELADANAAPMVLQIPMYNEREVYKLSIGAACGLSWPSDRVIVQVLDSDTDPVIKEMVQVECKRWES  
KGVRIKYEIRDNRVGYKAGALREGMKHGVRDCDYVAIFDADFQPDFLARTIPFLVHNPDIALVQARWKVFNANEC  
LMTRMQEMSLDYHFKEQEVGSSTHAFFGFNGTAGVWRISAMNEAGGWKDRTTVEDMDLAVRAGLKGWKVYLG  
DLMVKSELPSTFKAFRYQQHRWSCGPANLFRKMLVEIATNKKVTLWKKIYVIYNFFLVRKIIGHIVTFVYCLVVPATVLI  
EVEIPRWGYVYLPISVITILNSIGTPRSLHLLIFWVLFENVMSLHRKATLIGLLETGRVNEWVTEKLGDAKLLKLPKKA  
RPRMRIGDRVNALELGFSAYLSFCGCYDIAYGKGYSLFLFLQSITFFIIGVGYVGTIVPH

>OS01G56130\_OsCsIC1MARWWGGEGRGGSGTPVVVKMESPEWAISEVEAGAAAPGSPAAGGKAGRGKNAHQIT  
WVLLLLKAHRAAGKLTGAASAALSVAARRRVAAGRTSDDDAAAAPPGESPALRARFHGFLRAFLLLSVLLLAVDVAA  
HAQGWHA VVPDLLAVEGLFAAAYASWLRVRLEYLAPGLQFLANACVVFLIQSADRILCLGCLWIKLKGKIPVPKASGG  
GGGGKGSDDVEAGADEFPMVLVQIPMCNEKEVYQQSIGAVCNLDWPRSNFLVQVLDDSDDAATSALIKEEVEKWQR  
EGVRILYRHRVIRDGYKAGNLKSAMNCSYVKDYEFVIFDADFQPADFLKRTVPHFKGNEDVGLVQARWSFVNKDE  
NLLTRLQININLCFHFEVEQQVNGVFLNFFGFNGTAGVWRIKALEDSSGGWMERTTVEDMDIAVRAHLKGWKFLYINDV  
ECQCELPESYEAYRKQQHRWHSGPMQLFRLCFVDIISKIGVWKKFNLIFLFFLLRKLILPFYSFTLFCIILPMTMFVPEAEL  
PAWVVCYIPATMSLLNILPAPKSFPIVYLLFENTMSVTKFNAMISGLFQLGSAYEWWVTKSGRSSEGLVSLVEKQP  
KQQRVGSAPNLDLAKESHPPKDKSKKKKHNRQYQKELALSLLLLTAAARSLLSVQGIHFYFLLFQGVSLVGLDLIGEQUE

>OS07G03260\_OsCsIC10MAPWSGFWAASRPALAAAAAGGTPVVVKMDNPNWSISEIDADGGEFLAGRRRRGRG  
KNAKQITWVLLLLKAHRAAGCLAWLASAAVALGAAARRRVAAGRTDDADAETPAPRSRYAFIRASLLLSVFLLAVELAA  
HANGRGRVLAASVDSFHSSWVRFRAAYVAPPLQLLADACVFLVQVSADRILVQCLGCLYIHLNRKPKPISSPAAAAAAL  
PDLEDPDAGDYYPMLVQIPMCNEKEVYQQSIAAVCNLDWPRSNILVQVLDDSDDPITQSLIKEEVEKWQRQNGARIVY  
RHRVLRREGYKAGNLKSAMSCSYVKDYEVVAIFDADFQYPDFLKRTVPHFKDNEELGLVQARWSFVNKDENLTRLQNI  
NLCFHFEVEQQVNGIFINFFGFNGTAGVWRIKALEDSSGGWMERTTVEDMDIAVRAHLNGWKVFLNDVEQCCELPES  
YEAYRKQQHRWHSGPMQLFRLCLPDIIRCKIAFWKKANLIFLFFLLRKLILPFYSFTLFCIILPMTMFIPEAELPDWVVCYIP  
ALMSFLNILPAPKSFPIIPYLLFENTMSVTKFNAMISGLFQLGSAYEWWVTKSGRSSEGLIALAPKELKQKILDLTAIK  
EQSMLKQSSPRNEAKKYNRIYKELALSLLLLTAAARSLLSKQGIHFYFLMFQGLSFLVGLDLIGEDVK

>OS09G25900\_OsCSLC2MAPPVGVGVAYLWGKGRGGRKGTTPVVVTMESPNSVVEVDGPDAAEELRTAAVAM  
DKGGGRGRSRRTARQLTWVLLLRARRAAGRLASFAAAAARRFRSPADADELGRGRGRMLMYGFIRGFLALSLLALA  
VELAAYWNGWRLRRPELHVPEAVEIEGWAHSAYISWMSFRADYIRRPIEFLSKACILLFVIQSMRDLVLCGCFWIKLRKI  
KPRIEGDPFREGSGYQHPMVLVQIPMCNEKEVYEQSISAACQLDWPREFLIQVLDDSSDESIQLLIKAEVSKWVSHQGV  
NIVYRHRVLRRTGYKAGNLKSAMSCDYVKDYEVVAIFDADFQPTDFLKKTIHPFEGNPELGLVQARWSFVNKDENLTRL  
LQININLCFHFEVEQQVNGVFLNFFGFNGTAGVWRIQALEESGGWLERTTVEDMDIAVRAHLNGWKVFLNDVKVLC  
LPESYEAYRKQQHRWHSGPMHLFRLCLPDILTAKISSWKKANLILLFFLLRKLILPFYSFTLFCVILPLTMFVPEAELPVWVI  
CYVPVCMFLNILPSRSPFPIVYLLFENTMSVTKFNAMVSGLFKLGSSYEWVIVTKSGRSSESDLSTAAERDTKDLTLPR  
LQKQISESELIELKMQRERQEKAPLGAKKANKVYKELALSLLLLTAAATRSLLSAQGIHFYFLLFQGVSLVGLDLIGEQU

>OS08G15420\_OsCsIC3MAPPNTYSESWWGGKEERGTPVVVKMDNPVSLVEIDGPGMAAPSEKARGKNAKQIT  
WVLLLLRAHRAVGCVAWLAAGFWAVLGAVNRRVRRSRDADAEPDAEASGRGRAMLRFLRGFLLLSLAMLAFETVAHL  
KGWHFPRSAAGLPEKYLRRLEHLQHLPEHLRRHLPEHLRMPKEEIEGWLHRAVVAWLAFRIDYIAWAIQKLSGFCIAL  
FMVQSVDRVLVLCGCFWIKLRGKIPVADTSISNDDIEATAGDGGGYFPMVLIQMPMCNEKEVYETSISHVCQIDWPRE  
RMLVQVLDDSDDETCQMLIKAEVTKWSQRGVNIIYRHLNRTGYKAGNLKSAMSCDYVRDYEVVAIFDADFQPNPDF  
LKLTVPHFKGNPELGLVQARWSFVNKDENLTRLQININLCFHFEVEQQVNGVYLSFFGFNGTAGVWRIKALEDSSGGW  
MERTTVEDMDIAVRAHLNGWKVFLNDVKVLCPELPSYQAYRKQQHRWHSGPMQLFRLCLPAVFKSKISTWKKANLV  
MLFFLLRKLILPFYSFTLFCVILPLTMFVPEAELPIWVICYPVIMSVLNILPAPKSFPIVYLLFENTMSVTKFNAMVSGLF  
QLGSSYEWVIVTKKAGRTSSESDILALAEAADADARPPAKLHRGVSEGLKEWAKLHKEQEDATAAAAAAAGTPVK  
KSKAAKAPNRIFFKELALAFLLLTAAATRSLLSAQGLHFYFLLFQGVTFVAVGLDLIGEQVS

>OS05G43530\_OsCsIC7MAPSWWGRSGGGVGNNGGTPVVVKMENPNWSISEVEAAEVAPGSPAGAGKAGRGK  
NARQITWVLLLLKAHRAAGRLTGAASAALAVASAARRRVASGRTDADAAPGESTALRARSYGICIRVSLVLSLLLLAVEVAA

YLQGWHLLEEVASLLAVDGLFAASYAGWMRLRLDYLAPPLQFLTACVALFMVQSIDRLVLCLGCFWIRFKGIKVPVQA  
AAAGKPDVEAGAGDYPMLVQMPMCNEREVYQQSIGAVCNLDWPKSNFLVQVLDDSDATTALIKEEVEKWQRE  
GVRIYRHRVIRDGYKAGNLKSAMNCSYVKDYEFVIFDADFQPADFLKRTVPHFKGKDDVGLVQARWSFVNKDENL  
LTRLQNVNLCFHFEVEQQVNGAFLNFFGFNGTAGVWRIKALEDSSGGWMERTTVEDMDIAVRAHLKGWKFVFLNDV  
ECQCELPESYEAYRKQQRHWHSQPMQLFRLCFVDIISKIGFWKKNLIFLFFLLRKLILPFYSFTLFCVILPMTMFVPEAEL  
PAWVVCYIPATMSILNILPAPKSPFVFPYLLFENTMSVTKFNAMISGLFQLGSAYEWVVTKSGRSSEGLVGLVEKHSK  
QQRVGSAPNLDALTKESNPKKDKSKKKHNRIYRKELALSLLLLTAAARSLLSAQGIHFYLLFQGVSFVGLDLIGEQVE

>OS03G56060\_OsCsIC9MVLVQIPMCNEKEVYQQSIAAVCNLDWPRSNFLVQVLDDSDPTTQTILREEVLKWQQN  
GARIVYRHRVLRDGYKAGNLKSAMSCSYVKDYEFVAIFDADFQPNPDFLKRTVPHFKDNDELGLVQARWSFVNKDENL  
LTRLQNIINLCFHFEVEQQVNGIFLNFFGFNGTAGVWRIKALDDSSGGWMERTTVEDMDIAVRAHLRGWKFIFLNDVEC  
QCELPESYEAYRKQQRHWHSQPMQLFRLCLPDIICKIVFWKKNLIFLFFLLRKLILPFYSFTLFCIILPMTMFVPEAELPD  
WVVCYIPALMSLLNILPSPKSPFVFPYLLFENTMSVTKFNAMISGLFQLGNAYEWVVTKSGRSSEGLISLAPKELKHQK  
TESAPNLDAIAKEQSAPRKDVKKKHNRIRYKELALSLLLLTAAARSLLSKQGIHFYLLFQGISFVGLDLIGEQIE

>OS10G42750\_OsCsID1MASKGILKNGGKPTAPSSAAPTUVFGRRTDSGRFISYSRDDLDSEISSVDFQDYHVHIPMT  
PDNQPMDDPAAGDEQQYVSSSLFTGGFNSVTRAHVMEKQASSARATVSACMVQGGCGSKIMRNRGRADILPCECDFKI  
CVDCTDAVKGGGGVCPGCKEYKHAEEVVSASNHDAINRALSPLHGHHGPKMERRLSLVKQNGGAPGEFDH  
NRWLFETKGTGYGNAIWPEDDGVAGHPKELMSKPWRPLTRKLRIQAAVISPYRLLVLRVALGLFLMWRIKHQNE  
AIWLWGMSIVCELWFALSWSVLDQLPKLCPINRATDLSVLKDKFETPTPSNPTGKSDLPGIDIFVSTADPEKEPVLVTANTI  
LSILAADYPVDKLACYVSDGGALLTFEAMAEAAASFANLWVPCFRKHEIEPRNPDSYFNLKRDPFKNKVKGDFVKDRRR  
VKREYDEFKVRVNLPLDAIRRRSDAYHAREEIQAMNLQREKMKAGGDEQQLEPIKIPKATWMADGTHWPGTWLQA  
SPEHARGDHAGIIQVMLKPPSPSSSGGDMEKRVDLGVDTRLPLVVSREKRPYDHNKKAGAMNALVRASAIM  
SNGPFILNLDLDCDHVYNSKAFREGMCFMMDRGGDRLCYVQFPQRFEGIDPSDRYANHNTVFFDVNMRALDGLQGPV  
YVGTGCLFRRIALYGFDPFRSKDHTTPWSCCLPRRRRTRSQPQPQEEEEETMALRMDMDGAMNMAFPPKFGNSSFL  
IDSIPVAEFQGRPLADHPSVKNGRPPGALTIPRETLASIVAEAISVSCWYEEKTEWGTRVWGIYGSVTEDEVVTGYRM  
HNRGWKSVYCVTHRDAFRGTAPINLTDRLHQVLRWATGSVEIFFSRNNALFASKMKVLQRIAYLNVGIYPTSVFLIVY  
CFLPALSLFSGQFIVQTLNVTLTYLLIITITLCLLAMLEIKWSGIALEEWWRNEQFWLIGGTAHAAVLQGLLKVIAIGIEIS  
FTLTSKQLGDDVDDEFAELYAVKWTSLMIPPLTIIMINLVAIAGVFSRTIYSTIPQWSKLLGGVFFSFWLAHLYPFAKGL  
MGRRGRTPITIVVWSGLVAITISLLWIAIKPPSAQANSQLGGSFSP

>OS06G02180\_OsCsID2MASSGGGLRHSNSSRLSRMSYSGEDGRAQAPGGGGDRPMVTFARRTHSGRYVSYSRD  
DLDELGNSSGDMSPESGQEFNLNYHTIPATPDNQPMDDPAISARVEEQYVSNLFTGGFNSVTRAHLMDKVIIESEASHP  
QMAGAKGSSCAINGCDAKVMSSDERGDDILPCECDFKICADCFADAVKNGGACPGCKDPYKATELDDVVGARPTLSLP  
PPPGGLPASRMERRLSIMRSQKAMTRSQTGDWDHNRWLFETKGTGYGNAIWPKENEVDNGGGGGGGGGLGGG  
DGQPAEFTSKPWRPLTRKLKIPAGVLSPYRLLILIRMAVLGLFLAWRIKHKNEDAMWLWGMSSVCELWFLSWLLDQ  
LPKLCVNRATDLAVLKDCKFETPTSPNPNGRSDLPGLDIFVSTADPEKEPPLVTANTILSILAADYPVEKLSCYVSDGGAL  
LTFEAMAEAAASFANMWWPCFRKHDIENRNPESYFNLKRDYKKNKVRSDVFKDRRRVKREYDEFKVRINSLPDSIRRRSD  
AYHAREEIKAMKRQREAAALDDVVEAVKIPKATWMADGTHWPGTWIQPSAEHARGDHAGIIQVMLKPPSSDDPLYGTS  
GEEGRPLDFTVDIRLPLVVSREKRPYDHNKKAGAMNALVRSSAVMSNGPFILNLDLDCDHVYNSQAFREGMCF  
MMDRGGDRIGYVQFPQRFEGIDPSDRYANHNTVFFDVNMRALDGIMGPVYVGTGCLFRRIALYGFDPFRSKEHSGCC  
SCCFPQRRKVKTSTVASEERQALRMADFDDEEMNMSQFPKFGNSNFLINSIPIAEFQGRPLADHPGVKNGRPPGALT  
VPRDLLASTVAEAVISVSCWYEDKTEWGQRVWGIYGSVTEDEVVTGYRMHNRGWKSVYCVTKRDAFRGTAPINLTDRL



LHQVLRWATGSVEIFFSRNALLASRKMFLQRIAYLNVGIYPFTSIFLIVYCFPALSLSFGQFIVRTLNVFTLYLLVITL  
MCMLAVLEIKWSGISLEEWWRNEQFWLIGGTSAPLAHLQGLLKVIAAGIEISFTLTSKSGGDEADDEFADLYIVKWTS  
MIPPVIMMVNLIQAVGFSRTIYSEIPQWSKLLGGVFFSFVWLAHLVYFAKGLMGRRGRTPVIVFVWSGLLAIISLLWV  
AINPPSQNSQIGGSFTFP

>OS08G25710\_OsCsID3MSTGPGKKAIRNAGGVGGGAGPSAGGPRGPAGQAVKFARRTSSGRYVSLREDIDMEGE  
LAADYTNVTVQIPPTPDNQPMLNGAEPASVAMKAEEQYVSNSLFTGGFNSATRAHMDKVISSVSHPMAGAKGS  
RCAMPACDGSAMRNERGEDVDPCECHFICRDCYLAQKDGCCPGCKEYKIGEYADDDPHDGLHLPGGGGGN  
KSLARNQNGEFDHNRWLFESSGTGYGNFVWPKGGMYDDDLDDVDKLGDDGGGGGGGGPLPEQKPFKPLTRKI  
PMPTSVISPYRIFIVIRMFVLLFYLTWRIRPNMEALWLWGMISVCELWFAFSWLLDMLPKVNPVNRSTDLAVLKEKFE  
TPSPSNPHGRSDLPGLDVFVSTADPEKEPVLTTATTILSILAVDYPVEKLACYVSDGALLTFEAMAEASFANVWVPF  
CKKHDIERNPDSYFSVKGDPKTKRRNDFVKDRRRVREFDEFKVRINGLPSIRRRSADFNAEDMKMLKHLRETGA  
DPSEQPKVKKATWMADGSHWPGTWAASAPDHAKGNHAGILQVMLKPPSPDPLYGMHDDQDQDIFSDVDIRLPLM  
VYMSREKRPGYDHNKAGAMNLRCSAVMSNGPFMLNFDCHYINNAQAVREAMCFFMDRGGGERIAYIQFPQRF  
EGIDPSDRYANNNTVFFDGNMRALDGLQGPMYVGTGCMFRRFAVYGFDPPTAEYTGWLFTKKKVTTFKDPESDTQ  
TLKAEDFAELTSHLVRFRFGNSSPFMASIPVAEFQARPLADHPAVLHGRPSGALTVP RPPLDPPTVAEAVSVISCWYED  
KTEWGDVGVWYIGSVTEDVVTGYRMHNRGWRVSYCITKRDAFLGTAPINLTDRLHQVLRWATGSVEIFFSRNNAFLA  
SRKMLLQRISYLNVIYPFTSIFLLVYCFIPALSLSFGFFIVQKLDIAFLCYLLTMTITLVALGILEGLLKVMAGIEISFTLTA  
AADDNEDIYADLYIVKWSSLLIPITIGMVNIIAIAFAFARTIYSDNPRWGKFIGGGFFSFVWLAHLNPFKGLMGRRGKT  
PTIVFVWSGLLSITVSLWVAISPPEANSNGGARGGGGFQFP

>OS12G36890\_OsCsID4MSRRLSLPAGAPVTVAVSPVRSPPGDAVVRGSGLTSPVPRHSLGSTATLQVSPVRRSGG  
SRYLGASRDGGGADESAEFVHYTVHIPPTDRATASVASEAEAAAEAEVHRPQRSYISGTIFTGGLNCATRGHVLNFSGE  
GGATAASRAAASGNMCKMRGCDMPAFLNGRPPDCGFMICKEYAECAAGNCPGCKEAFSAGSDTDES SVTD  
DDDDEAVSSSEERDQLPLTSMARKFSVHSMKVPGAAANGNGKPAEFDHARWLFETKGTGYGNALWPKDGHASH  
GAGFVAADPEPPNFGARCRRPLTRKTSVSQAILSPYRLLIAIRLVALGFFLAWRIRHPNPEAVWLWAMSVACEVWFAFS  
WLLDSLPLKCPVHRAADLAVLAERFESPTARNPKGRSDLPIDVFTSADPEKEPPLVTANTILSILAADYPVEKLACYLSD  
DGGALLSFEALAEASFARTWVPFCRKHGVEPRCEAYFGQKRDFLKNKVRVDFVRERRRKKREYDEFKVRVNSLPEAI  
RRRSDAYNAGEELRARRRQEQEAAAAAAGNGELGAAVETA AVKATWMSDGSHPGTWTCPAADHARGDHAGI  
IQAMLAPPTSEPVMGGEAAECGLIDTTGVDVRLPMLVYVSREKRPGYDHNKAGAMNLRVTSAIMSNGPFILNLD  
CDHYVHNSSALREGMCFMLDRGGDRVCFVQFPQRFEGVDPSDRYANHNLVFFDVS MRAMDGLQGPMYVGTGCVF  
RRTALYGFSPPRATEHHGWLGRRKIKLFLTKKSMGKKTDR AEDDTEMMLPPIEDDDGGADIEASAMLPKRFGGSATF  
VASIPVAEYQGRLLQDTPGCHHGRPAGALAVPREPLDAATVAE AIGVISCFYEEKTEWGRRIGWIYGSVTE DVVTGYRM  
HNRGWRVSYCVTPRRDAFRGTAPINLTDRLHQVLRWATGSVEIFFSRNNALFASPRMKLLQRVAYFNAGMYPFTSVFL  
LAYCLLPAVSLFSGKFIVQRLSATFLAFLVITLTLCLLALLEIKWSGITLHEWWRNEQFWVIGGTSAPLAHLQGLLKVIA  
GVDISFTLTSKPGNGGGDGGVGGEGNDDEAFAELYEVRSYLMVPPVTIMMVNAVAIAVAAAARTLYSEFPQWSKLLG  
GAFFSFVWLCHLYPFAKGLLGRGRVPTIVFVWSGLISMIISLLWVYINPPAGARERIGGGGFSFP

>OS06G22980\_OsCsID5MSVDYANYTVLMPPTPDNQPSGGAPPAAPSAGGARPGDLPLPPYGSSSSSRLVNRGGG  
DDGAKMDRRLSTARVPAPSSNKSLVRSQTGDFDHNRLWFETKGTGYIGNAYWPQDNVYGGDGGGGAVKMEDLVE  
KPWKPLSRKVPIPPGILSPYRLLVLRVFLFLVWRVTNPNMDALWLWGISIVCEFWFAFSWLLDQMPKLNPNIRAA  
DLAALKEKFESPTNPTGRSDLPGLDVFISTADPYKEPTLVANTLLSILATEYPVEKLFVYISDDGGALLTFESMAEACAF  
AKVWVPFCRKHSEPRNPDSYFTQKGDPTKGGKRPDFVKDRRWIKREYDEFKIRVNSLPDLIRRRANALNARERKLARD

KQAAGDADALASVKAATWMADGTHWPGTWLDPSPDHAKGDHASIVQVMIKNPHHDVVYGEAGDHPYLDMTDVD  
MRIPMFAYLSREKRAGYDHNKKAGAMNAMVRASAILSNPGFMLNFDCHYIYNCQAIREAMCYMLDRGGDRICYIQ  
FPQRFEGIDPSDRYANHNTVFFDGNMRALDGLQGPMYVGTGCLFRRYAIYGFNPPRAIEYRGTYGQTKVPIDPRQGSE  
AMPGAGGGRRSGGSGVGGDHELQALSTAHPDHEAPQKFGKSKMFIESIAVAEYQGRPLQDHPSVLNGRPPGALLMPR  
PPLDAATVAESVSVISCWYEDNTEWGQRVGWYGSVTEDEVVTGYRMHNRGWRSVYCITRRDAFRGTAPINLTDRLHQ  
VLRWATGSVEIFFSKNNAVLASRRKFLQRMAYLNVGIYPFTSLFLIMYCLLPALSLFSGQFIVATLDPTFLSYLLITITLML  
LCLLEVKWSGIGLEEWWRNEQFWVIGGSAHLAAVLQGLLKVVAGIEISFTLTAKAAAEDDDDPFAELYLIKWTSLFIPP  
LAVIGINIILVVGVSRTVYAEIPQYSKLLGGGFFSFVWLAHYYPFAKGLMGRRGRTPPTIVYVWAGLISITVSLWITISPPD  
DSVAQGGIDV

>OS09G30120\_OsCsIE1MAYNYPSEKISVYLSDDGGSILTFYALWEASIFAKKWLPFCKRYNIEPRSPAAYFSESKVHHN  
LCIPKEWALIKNLYEEMRERIDATMSGKPIPEEMKLKHKGFDEWNSDFTLKNHQPIVQILIDGKNRNAIDDDRNVLPTM  
VYVAREKRPPQYHHNFKAGALNALIRVSSVISDSPVILNVDCDMYSNNSDSIRDALCFFLDEEMGQKIGFVQYPQIFNNM  
TQNDIYGNFSFNVSYHVEMCGLDSVGGCLYIGTGCFHRREILCGRIFSKDYKENWNRGIKERGKENINEIEEKATSLVTCTY  
EHRTQWGNDIGVKYGFPAEDIITGLAIHCRGWESAFINPKRAAFLGLAPSTLAQNILQHKRWSEGNLTIFLSKYCSFLFG  
HGKIKLQLQMGYICGLWAANSPLTYVVPISLGLVKGTPFLPQIMSPWATPFYVFCVKTYGLYEALLSGDTLKGWW  
NGQRMWMMVKSITSYLYGFIDIRKCVGMSKMSFEVTAKVSGHDEAKRYEQEILEFGSSSPEYVIAATVALLNFVCLVGG  
SQIMAGVWNMPWNVFLPQAILCGMIVIINMPIYEAFLRKDNGRIPTAVTLASIGFVMLAFLVPIV

>OS02G49330\_OsCsIE2MATAAALALHTQFRPPRSPRRLRQHLALPSGVLIRSPVRSASAASASAPAQREAAAAGVP  
WGCEIESLESASVSLERWLTDGLPEQRLGIQRVDVGERGLVALKNIRKGEKLLFVPPSLVITADSEWGCPEVGNVLKRNS  
VPDWPLIATYLISEASLESSRWSSYIAALPRQYPSLLYWRPELDAYLVASPIRERAIQRITDVVGTYNLDRDRIFSKHSDL  
FPEEVYNLETFRWSFGILFSRLVRLPSMDGRVALVPWADMLNHSPEVETFLDYDKSSGGIVFTTDRSYQPGEQVFISYK  
KSSGELLISYGFVPKEGTNPNSVELLVS LNKSDKCYKEKLQALKRNGLSEFESFPLRVTGWPVELMAYFLVSPPEMS  
QRFEEMAVAASNKSPSKPGLNYPELEEALQFILDCCESNIAKYTKFLEGSSGSLQLSTNSKQANRTLLLKQLARDLCISER  
RILYRTQYVVFVADEAQTVEEKEIDKSDYNLSRQATDARRLEVVGSMAGSGGGVVS GGRQRPPLFATEKPGRMAM  
AAYRVSAAATVFAVLLIWLRYRATHLPPGGGDGVRWAWLGM LAAELWFGFYWVLTLSVRWCPVYRRTFKDRLAQRI  
LIANSYSEDELPSVDIFVCTADPTAEPMLVISTVLSVMAYDYLPKLNILYSDDAGSVLTFYVLCSEAFKHWIPFCKKYK  
VEPRSPAAYFAKVASPPDGC GKWFMTKELYKDMTDRVNSVNSGRIVEVPRCHSRGFSQWNENFTSSDHPSIVQIR  
VSSVISNSPIIMNVDCDMYSNNSSESIRDALCFFLDEEQGDIGFVQYPQNFENVVHNDIYGHPIINVNELDHPCLDGW  
GGMCYGTGCFHRREALCGRIYSQEYKEDWTRVAGRTEDANELEEMGRSLVTCTYEHNTIWI GIEKGVRYGCPLEDVTT  
GLQIQCRGWRSVYVNPKRKGF LGMTPTSLGQILVLYKRWTEGFLQISLSRYS PFLGHGKIKLGLQMGYSVCGFWAVNS  
FPTLYVVTIPSLCFLNGISLFPEKTSPWFIFAYVMVAAYSCSLAESLQCGDSAVEWVNAQRMWLIRRITSYLLATIDTFR  
RILGISESGFNLTVKVTDLQALERYKKGMM EFGSFSAMFILTVALLN LACMVGVKCTASTSTCEMGA I

>OS09G30130\_OsCsIE6METTTTERRRLFATEKVGGRAVYRLQAATVAAGILLVLYRATRVPAAEGRAAWLGMAA  
AELWFAVYVWVITQSVRWCPVRRRTFKNRLAERYKENLPGVDVVFCTADPHAEPPLVISTILSVMAYNYPSEKISVYLS  
DGGGSILTFYALWEASMF AKKWLPFCRRY NIEPRSPAAYFSESEGHNL CSPKEWSFIKNLYEEMRERIDSAVMSGKIP E  
IKLHKHGFDEWNSEMTSKNHQPIVQVLIDGKSQNAVDDDG NVLPTLVYMAREKSPQYHHNFKAGALNALIRVSALISDS  
PVILNVDCDMYSNNSDSIRDALCFFLDEEMSHKIGFVQYPQNYNNMTKNNIYGNLNVINH VEMRGLDSAGGCLYIGT  
GCFHRREILCGKFKSKDYKEDWGRGIKERGHENIDEIEEKAKSLATCTYELRTQWGN EIGVKY GCPVEDVITGLAIHCRG  
WESVYMEPQRAAFVGVAPATLAQTILQHKRWSEGNFTIFLSKHNTFLFGHGKISLQLQMGYCIYGLWAANSPLTYV  
MIPALGLVKGTPFLPEIMSPWATPFYVFCVKTYLSLYEALLSGD TLKGWWNGQRMWMMVKRITSYLYGFIDIRKLLGLS

KMSFEITAKVSDGDEAKRYEQEILEFGSSSPEFVIIATVALLNFVCLVAGLSKIMAGVWNVFLPQVILCGLIVITNIPIYEA  
M FVRKDKGRIPVTLASIGFVMLAFLLPIV

>OS07G36700\_OsCsIF1MSAAAATSWTNGCWSPAATRVNDGGKDDVWVAVDEADVSGARGSDGGGRPPLFQT  
YKVKGSILHPYRFLILARLIAIVAFFAWRIRHKNRDGAWLWTMSMVGDVWFGFSWVLNQLPKQSPIKRVPDIAALADR  
HSGDLPGVDFVFTTVPVDEPILYTVNTILSILAADYPVDYACYSDDGGTLVHYEAMVEVAKFAELWVWVFCRKHCV  
PRSPENYFAMKTQAYKGGVPGELMSDHRRVRREYEEFKVRIDSLSTIRQRSDVYNAKHAGENATWMADGTHWP  
WFEPADNHQRGKHAGIVQVLLNHPSCPKRLGLAASAENPVDFSGVDVRLPMLVYISREKRPYGNHQKAGAMNVML  
RVSALLSNAPFVINFDGDHYVNSQAFRAPMCFMLDGRGRGGENTAFVQFPQRFDDVDPTDRYANHNRFVFDGTM  
LSLNLQGPSYLTGTMFRRVALYGVEPPRWGAAASQIKAMDIANKFGSSTSFVGTMLDGANQERSITPLAVLDESVA  
GDLAALTACAYEDGTSWGRDVGWVYNIATEDVVTGFRMHRQGWRSVYASVEPAAFRGTAPINLTERLYQILRWSSG  
SLEMFFSHSNALLAGRRLHPLQRVAYLNMSTYPIVTVFFIFYNLFPVMWLISEQYIQRPFGEYLLYLVAVIAMIHVIGM  
FEVKWAGITLLDWCNEQFYMIGSTGVYPTAVLYMALKLVTGKGIYFRITSKQTAASSGDKFADLYTVRWVPLLIPTIV  
M VVNVAAVGVAVGKAAAWGPLETEPGWLAVLGMVFNWVWILVLLYPFALGVMGQWGKRPAVLFVAMAMAAVA  
MYVAFGAPYQAELSGVAASLGKVAASLTGPSG

>OS07G36690\_OsCsIF2MAATAASTMSAAAATRRINAALRVDATSGDVAAGADGQNGRRSPVAKRVNDGGGGK  
DDVWVAVDEKDVCGARGGDGAARPLFRYKVKGSILHPYRFLILLRLIAIVAFFAWRVRHKNRDGVWLWTMSMVG  
DVWFGFSWVLNQLPKLSPIKRVPDIAALADRHSGDLPGVDFVFTTVPVDEPILYTVNTILSILAADYPVDYACYSDD  
GGTLVHYEAMVEVAKFAELWVWVFCRKHCVPRSPENYFAMKTQAYKGGVPGELMSDHRRVRREYEEFKVRIDSLSTI  
RQRSDVYNAKHAGENATWMADGTHWPWTWFEPADNHQRGKHAGIVQVLLNHPSCPKRLGLAASAENPVDFSGVD  
VRLPMLVYISREKRPYGNHQKAGAMNVMLRVSALLSNAPFVINFDGDHYVNSQAFRAPMCFMLDGRGRGGENT  
AFVQFPQRFDDVDPTDRYANHNRFVFDGTM LSLNLQGPSYLTGTMFRRVALYGVEPPRWGAAASQIKAMDIANK  
FGSSTSFVGTMLDGANQERSITPLAVLDESVA GDLAALTACAYEDGTSWGRDVGWVYNIATEDVVTGFRMHRQGW  
RSVYASVEPAAFRGTAPINLTERLYQILRWSSG SLEMFFSHSNALLAGRRLHPLQRVAYLNMSTYPIVTVFFIFYNL  
FPVMWLISEQYIQRPFGEYLLYLVAVIAMIHVIGMFEVKWAGITLLDWCNEQFYMIGSTGVYPTAVLYMALKLVTG  
KGIYFRITSKQTTASSGDKFADLYTVRWVPLLIPTIV IIVVNVAAVGVAVGKAAAWGPLETEPGWLAVLGMVFN  
WVWILVLLYPFALGVMGQWGKRPAVLFVAMAMAAVAAM YVAFGAPYQAELSGGAASLGKAAASLTGPSG

>OS07G36750\_OsCsIF3MASPASVAGGGEDSNGCSSLIDPLLVSRTSSIGGAERKAAGGGGGGAKGKHWAADKGE  
RRAAKECGGEDGRRPLFRSYRVKGSLLHPYRALIFARLIAVLLFFGWIRHNSDIMWFWTMSVAGDVWFGFSWLLN  
QLPKFNPKTIPDLTALRQYCDLADGSYRPLGIDVFTTADPIDEPVLYTMNCVLSILAADYPVDRSACYSDDSGALILY  
EALVETAKFATLWVWVFCRKHCVPRSPESYFELEAPSYTGSAPPEEFKNSRIVHLEYDEFKVRLEALPETIRKRS  
DVNSMKT DQGAPNATWMANGTQWPGTWIEPIENHRKGGHAGIVKVLDHPIRGHNLSLKDSTGNLNFNATDVRIPML  
VYVSRGKNPNYDHNKAGALNAQLRASALLSNAQFIINFDCDHYINNSQAFRAAICFMLDQREGDNTAFVQFPQRF  
DNVDP KDRYGNHNRFVFDGTM LALNLQGPSYLTGTGCMFRRALYGDIPPHWRQDNITPEASKFGNSILLLESV  
LEALNQDRF ATPSPVNDIFVNELEMVVSASFDKETDWGKGVGYIYDIATEDIVTGFRHGGQWRS MYCTMEHDA  
FCGTAPINLTERLHQIVRWSSG SLEMFFSHNNPLIGRRLLQPLQRVSYLNM TIYPVTSLFILLYAISPV  
MWLIPDEVYIQRPFTRYVYVLLV IILMIHMIGWLEIKWAGITWLDYWRNEQFFMIGSTSA YPTAVLHMV  
VNLTKKGIHFRVTSKQTTADTNDKFADLYEMR WVPMLIPTMVVLANIGAIGVAIGKTAVYMGVW  
TIAQKRHAAMG LLLFNMWVMFLLYPFALAIMGRWAKRSIILV LPIIFVIVALVYVATHILLANIIPF

>OS07G36740\_OsCsIF4MSAAVTRRINAGGLRVEVTNGGAAGVYVAAAAAPCSPAARKRVNDGGGKDDVWVAV  
DEADVSGPSGGDGVRPTLFRITYKVKGSILHPYRFLILVRLIAIVAFFAWRVVRHKNRDRGAWLWTMSMAGDVWFGFSW  
ALNQLPKLNPIKRVADLAALADRQHQGTSGGGELPGVDVFTTVDVDEPILYTVNSILSILAADYPVDYACYLSDDGG  
TLVHYEAMVEVAKFAELWVFPFCRKHCVPRAPESYFAMKTQAYRGGVAGELMSDRRRRVRREYEEFKVRIDSLFSTIRKR  
SDAYNRAKDGKDDGENATWMADGTHWPGTWFEPAENHRKGQHAGIVQVLLNHPTSKPRFGVAASVDNPLDFSGV  
DVRLPMLVYISREKRPGYNHQKAGAMNALLRVSALLSNAPFIINFDCDHVNNNSQAFRAPMCFMLDRRGGGDDVAF  
VQFPQRFDDVDPTDRYANHNRFVFDGTTLSLNLQGPSYLGTMFRRAALYGLEPPRWGAAGSQIKAMDNANKFG  
ASSTLVSSMLDGANQERSITPPVAIDGVSARDLAAVTACGYDLGTSWGRDAGWVYDIATEDVATGFRMHQQGWRSV  
YTSMEPAAFRGTAPINLTERLYQILRWSSGSLEMFFSHSNALLAGRRLHPLQRIAYLNMSTYPIVTVFIFYNLFPVMWLI  
SEQYYIQPFGEYLLYLVAIIAMIHVIGMFVWKWSGITVLDWCRNEQFYMIGSTGVYPTAVLYMALKLFTGKGIHFRLTS  
KQTTASSGDKFADLYTVRWVPLLIPTIVVLAVNVGAVGVAVGKAAAWGLLTEQGRFAVLGMVFNWVWILALLYPFALGI  
MGQRGKRPAVLVAVTMAVAVAIVMIAAFGAPYQAGLSGVAASLGAASLTGPSG

>OS08G06380\_OsCsIF6MAPAVAGGGGRRNNEGVNGNAAAPACVCGFPVCACAGAAAASAASSADMIDIVAAGQ  
IGAVNDESWVAVDLSDSDDAPAAGDVQALDDRPFVRETEKIKGVLLHPYRVLIFVRLIAFTLFIWRIEHKNPDAMWL  
WVTSIAGEFVWFGFSWLLDQLPKLNIPINRVPDLAVLRRRFDHADGTSSPLGLDIFVTTADPIKEPILSTANSILSILAADYPV  
DRNTCYLSDDSGMLLTYEAMAEAAKFATLWVFPFCRKHAIERGPESYFELKSHPYMGRAQEEFVNDRRRVRKEYDDFK  
ARINGLEHDIKQRSYNAAGVKDGEPRATWMADGSQWEGTWIEQSENHRKGDHAGIVLVLNHPHSHARQLGPP  
ASADNPLDFSGVDVRLPMLVYVAREKRPGCNHQKAGAMNALLTRASAVLSNSPFILNLDLDCDHYNNSQALRAGICFML  
GRSDTVAFVQFPQRFEGVDPTDLYANHNRIFFDGTLRALDGLQGPIYVGTGCLFRITLYGFEPPRINVGPPCFPRGG  
MFAKNRYQKPGFEMTKPGAKPVAPPPAATVAKGKHGFLPMPKAYGKSDAFADTIPRASHPSPYAAEAAVADEAAI  
AEAVMVTAAAYEKKTGWGSIDIGWVYGTVEDVVTGYRMHIKGWRSRYCSIYPHAFIGTAPINLTERLFQVLRWSTGSL  
EIFFSRNNPLFGSTFLHPLQRVAYINITYPFTALFLIFYTTVPALSFTVGHFIVQRPTTMFYVYLAIVLGTLLILAVLEVKWA  
GVTVFEWFRNGQFWMTASCSAYLAAVLQVVTKVFRDISFKLTSKLPAGDEKKDPYADLYVVRWTLMITPIIIILVNI  
IGSAVAFKVLGDEWTHWLKVAGGVFFNFVWLFHLYPFAKGILGKHGKTPVVVLVWVAFTFVITAVLYINIPHIHGGP  
RHGAASPSHGHSAHGTKKYDFTYAWP

>OS10G20260\_OsCsIF7MPPSAGLATESLPAATCPAKKDAYAAAASPESETKLAAGDERAPLVRTTRISTTTIKLYRLTIF  
VRIAIFVLFFKWRITYAARASSTDAGGIGMSKAATFWTASIAGELWFAFMWVLDQLPKTMPVRRADVTLNDDTLL  
PAMDVFVTTADPDKEPLATANTVLSILAAGYPAGKVTCYVSDDAGAETRGAVVEARFAALWVFPFCRKHGVEPRN  
PEAYFNGGEGGGGGGGKARVVARGSYKGRAPVLRDRRRRVRREYEEMLRLRIDALQAADARRRRCGAADDHAGVVQ  
VLIDSAGSAPQLGVADGSKLIDLASVDVRLPALVYVCREKRRGRAHHRKAGAMNALLRASAVLSNAPFILNLDLDCDHVNV  
NSQALRAGICFMIERRGGGAEDAGDVAFVQFPQRFQDVGDPGDRYANHNRFVFDCTELGLDGLQGPIYVGTGCLFRRV  
ALYGVDPWRWSPGGGVAADPAKFGESAPFLASVRAEQSHSRDDGDAIEASALVSCAYEDGTAWGRDVGWVYGTV  
TEDVATGFCMHRRGWRSAYYAAAPDAFRGTAPINLADRLHQVLRWAAGSLEIFFSRNNALLAGGRRRLHPLQRAAYL  
NTTVYPFTSLFLMAYCLFPAIPLIAGGGGWNAAPTPTYVAFLAALMVTLAAVAVLETRWVSGIALGEWWRNEQFWMVS  
ATSAYLAAVAQVALKVATGKEISFKLTSKHLASSATPVAGKDRQYAELYAVRWTALMAPTAAALAVNVASMAAAGGG  
GRWWWWDAPSAAAAAALPVAFNVVVVHLYPFALGLMGRRSKAVRPILFLFAVVAYLAVRFLCLLLQFHTA

>OS07G36630\_OsCsIF8MAANGGGGGAGGCSNGGGGGAVNGAAANGGGGGGGGSKGATTRRAKVSPMDRYW  
VPTDEKEMAAAVADGGEDGRRPLLFRTFTVRGILLHPYRLLTLVRLVAIVLFFIWRIRHPYADGMFFWWISVIGDFWFG  
VSWLLNQVAKLKPIRRVPLNLLQQQFDLPDGNLPLGLDVFINTVDPINEMMIYTMNAILSILAADYPVDKHACYLSD  
DGGSIHYDGLLETAKFAALWVFPFCRKHSEPRAPESYFAVKSRYAGSAPEDFLSDHRYMRREYDEFKVRDLALFTVIPK

RSDAYNQAHAEEGVKATWMADGTEWPGTWIDPSENHKKGNHAGIVQVMLNHPSNQPQLGLPASTDSPVDFSND  
VRLPMLVYIAREKRPGYDHQKKAGAMNVQLRVSALLTNAPFIINFDDGHDYVNNKAFRAGICFMLDRREGDNTAFVQ  
FPQRFDDVDPTDRYCNHNRVFFDATLLGLNGIQGPSYVGTGCMFRRVALYGVDPWRPDDGNIVDSSKKFGNLDSEI  
SSIPIAANQERSIISPALLESILQELSDAMACAYEDGTDWGDVGVVNIATEDVVTGFRLHRTGWRSMYCRMEPDA  
FRGTAPINLTERLYQILRWSSGGSLEMFSSHNCPLLAGRRLNFMQRIAYINMTGYPVTSVFLFYLLFPVIWIFRGIYIQKP  
FPTYVLYLVIVIFMSEMIGMVEIKWAGLTLDDWIRNEQFYIIGATAVYPLAVLHIVLKCFLKGVSFKLTAKQVASSTSEKF  
AELYDVQWAPLLFPTIVVIAVNICAIGAAIGKALFGGWSLMQMGDASLGLVFNWILLIYPFALGIMGRWSKRPIYLFV  
LIVISFVIALADIAIQAMRSGSVRLHFRRSGGANFPTSXGF

>OS07G36610\_OsCsIF9MSLLPSCSAFLPSSSLYLRLAAELVLSAMLLTLVRLIAVVLFLAWRLKHRDSDAMWLWWISI  
AGDFWFGVTWLLNQASKLNPKRVPDLSLLRRRFDDGGLPGIDVFINTVDPVDEPMLYTMNSILSILATDYPADRHAA  
YLSDDGASLAHYEGLIETARFAALWVPFCRKHVRPEPRAPESYFAAKAOPYAGPALPEEFFGDRRLVRREYEEFKARLDALF  
TDIPQRSEASVGNANTKGAKATLMADGTPWPGTWTEPAENHKKGQHAGIVKVMLSHPGEEPQLGMPASSGHPLDF  
SAVDVRLPILVYIAREKRPGYDHQKKAGAMNAQLRVSALLSNAPFIFNFDDGHDYINNSQAFRAALCFMLDCRHGDDTA  
FVQFPQRFDDVDPTDRYCNHNRVFFDATLLGLNGVQGPSYVGTGCMFRRVALYGADPPWRPDDDAKALGCPGRY  
GNSMPFINTIPAAASQERSIASPAAASLDETAAMAEEVEVMTCAIEDGTEWGDVGVVYDIATEDVVTGFRLHRKG  
WRSMYCAMEPDAFRGTAPINLTERLYQILRWSSGGSLEMFSSRNCPLLAGCRLRPMQRVAYANMTAYPVSAFMVVY  
DLLPVIWLSHHGEFHIQKPFSTYVAYLVAVIAMIEVIGLVEIKWAGLTLDDWWRNEQFYMIGATGVYLA AVLHIVLKRLL  
GLKGVRFKLTAKQLAGGARERFAELYDVHWSPLLAPTVVVMVAVNVAIGAAAGKAVVGGWTPAQVAGASAGLVFNV  
WVLLVLLYPFALGIMGRWSKRPCALFALLVAACAABAAGFVAVHAVLAAGSAAPSWLWWSRGATAILPSSWRLKRGF

>OS10G20090\_CSLH1MEAAARGNKKLQERVPIRRTAWRLADLAILLLLALLHRVLHDSGAPWRRRAALACEAWFTF  
MWLLNVNAKWSPVRFDTFENLAERIDELPAVDMFVTTADPVLEPPLVTVNTVLSLLALDYPAAGEKLACYVSDDGCS  
PLTCYALREARFARTWVPFCRRHGVAVRAPFRYFSSTPEFGPADGKFLDWTFMKSEYEKLVHRIEDAEPSSLRHGG  
GEFAEFLDVERGNHPTIHKVLWDNNSRRTGDGFPRLIYVSREKSPNLHHHYKAGAMNALTRVSALMTNAPFMLNLDCD  
MFVNNPRVVLHAMCLLLGFDDEISCAFVQTPQKQFYGALKDDPFGNQLEVSMLKVGRIAGLQGFYCGTGCFHRRKVI  
YGMRTGREGTTGYSSNKLHSGFGSSNFKESARDVIYGNLSTEPIVDISSCVDVAKEVAACNYEIGTCWGQEVGVVY  
GSLTEDVLTGQRIHAAGWRSTLMEIEPPAFMGCAPNGGPACTQLKRWASGFLEILSRNPNILTTTFKSLQFRQCLAYL  
HSYVWPVRAPFELCYALLGPYCLLSNQSFPLKTSSEDFYIALALFIAYNTYMFMEFIECGQSARACWNNHRMQRITSAS  
AWLLAFLTIVLKTGFSETVFEVTRKDKSTSDGDSNTDEPEPGRFTFDESTVFIPVTALAMLSVIAIAGAWRVVLTTEG  
LPGGPGISEFISCGWLVLFCMPLLRGLVGSGRYGPWSIKMKACLLVAIFLLFCKRN

>OS04G35020\_OsCsIH2MAVVAAAAATGSTRSGGGGGEGTRSGRKKPPPPPLQERVPLGRRRAAWWRLAGLAVL  
LLLLALLALRLLRHGGAGGDDGVWRVALVCEAWFAALCALNVSAKWSPVRFVTRPENLVAEGRTPSTTAAEYGELPA  
VDMLVTTADPALEPPLVTVNTVLSLLALDYPRAGERLACYVSDDGCSPLTCHALREAAAGFAAAWVPFCRRYGVAVRAP  
FRYFSSSSPESGGPADRKFLDDWTFMKDEYDKLVRRIKNTDERSLLRHGGGEFFAEFLNVERRNHPTIVKTRVSAVMT  
NAPIMLNMDCDMFVNNPQAVLHAMCLLLGFDDEASSGFVQAPQRFYDALKDDPFGNQMECFKRFISGVQGVQGA  
FYAGTGCFHRRKAVYGVPPNFNGAEREDTIGSSSYKELHTRFGNSEELNESARNIWDLSSKPMVDISSRIEVAKAVSAC  
NYDIGTCWGQEVGVVYGSLEDILTQRIHAMGWRVLMVTEPPAFMGSAPIGGPACTQFKRWATGQSEIISRNN  
PILATMFKRLKFRQCLAYLIVLGWPLRAPFELCYGLLGPYICLTNQSFLPKASEDFSVPLALFISYNTYFMMEYMACGLSA  
RAWWNNHRMQRIISVSAWTLAFLTVLLKSLGLSETVFEVTGDKDMSDDDDNTDGADPGRFTFDSLVPFIPVTALAML  
NIVAVTVGACRVAFGTAEGVPCAPGIGEFMCCGWLVLCFFPFVRGIVWGKGSYGIPWSVKLKASLLVAMFVTFCKRN

>OS04G35030\_OsCsIH3MAAASGEKEEEEEKQLQERAPIRRTAWMLANFVVLFLLLALLVRRATAADAEEERG VGGAA  
WRVAFACEAWFAFVWLLNMNAKWSPARFDTYPEENLAGRCGAAHRPRKSSCISGHLDLMRRQCALMQDRRAAGGR  
HVRDDGGPGARAAGGDGEQGALAARRLLPGRRRRRRRRLACYVSDDGCSPTYYALREAAGFARTWVPFCRRHG  
VAVRAPFRYFASAFEPGADRKFLDDWTFMKSEYDKLVRRIEDAETLLRQGGGEFAEFMDAKRTNHRAIVKVIWDN  
NSKNRIGEEGGFPHLIYVSREKSPGHHHHYKAGAMNALTRVSAVMTNAPIMLNVDCCDMFANDPQVVLHAMCLLLGF  
DDEISSGFVQVPQSFYGDLDKDDPFGNKLEVIYKLLGGVAGI

>OS01G54620\_OsCesAMMESGVPPCAACGDDAHAACRACSYALCKACLEDAAEGRTTCARCGGEYGAPDPAHG  
QGAVVEEEVEESHEPAAGGVRERVMTASQLSDHQDEGVHARTMSTHARTISSVSGVSGSELNDESCKPIWKNRVESW  
KEKKKKKASAKKAAKAQAPPVEEQIMDEKDLTDAYEPLSRIIPISKNKLTPIYRAVIMRLVVLGLFFHYRITNPVYSAFGL  
WMTSVICEIWFQFSWILDQFPKWCPINRETYVDRILIARYGDGEDSGLAPVDFVSTVDPLKEPPLITANTVLSILAVDYP  
VEKISCYVSDDGSAMLTFESLAETAFAFARRWVPFCKKYSIEPRAPEFYFSQKIDYLDKDIHPSFVKERRAMKRDYEEYKVR  
NALVAKAQKTPEEGWIMQDGTWPWGNPRDHPGMIQVFLGETGARDFDGNELPRLVYVSREKRPYQHKKKAGA  
MNALVRVSAVLTNAPYILNLDCHYVNNKAVREAMCFMMDPSVGRDVCYVQFPQRFDGIDRSDRYANRNVVFFDV  
NMKGLDGLQGPVYVGTGCCFYRQALYGYGPPSPALPKSSVCSWCCCCPKKKAEEKSEKEMHRDSRREDLESAIFNLR  
EIDNYDEYERSMLISQMSFEKSFGLSSVFIESTLMENGGVPESANPSTLIKEAIHVISCYEEKTEWKGKIGWYIGSVTEDIL  
TGFKMHCRGWRSIYCMPIRPAFKGSAPINLSDRLHQVLRWALGSVEIFLSRHCPLWYGYGGGRLKWLQRLSYINTIVYP  
FTSLPLIAYCCLPAICLLTGKFIPTLSNAATIWFGLFISIIVTSVLELRWVSGIGIEDWWRNEQFWVIGGVSAHLFAVFQIL  
KMIAGLDTNFTVTAKATDDETEFGELYVFKWTTVLIPPTSILVNLVGVVAGFSDALNSGYESWGPLFGKVFAMWVIM  
HLYPFLKGLMGRQNRTPITIVVLSVLLASVFSLLWVKIDPFIGSSETTTTNSCANFDC

>OS03G59340\_OsCesAMDGAKSGKQCHVCQICGDGVGTAADGELTACDVCGFVPCRCYCYEYERKDG SQACPQCK  
TKYKRHKGSPPILGDESDDVDADDASDVNYPTSGNQDHHKHAERMLTWRMNSGRNDDIVHSKYDSGEIGHPKYDSG  
EIPRIYIPSLTHSQISGEIPGASPDHMMSPVGNIGRRGHPFYVNHSPNPSREFSGSLGNVAWKERVDGWKMKDKGAI  
PMANGTSIAPSEGRGVGDIDASTDYNMEDALLNDETRQPLSRKVPISRRINPYRMVIVLRLIVLCIFLHYRITNPVRNAY  
PLWLLSVICEIWFALSWILDQFPKWSPINRETYLDRALRYDREGEPSQLAPVDIFVSTVDPMKEPPLVTANTVLSILAVD  
YPVDKVCYVSDDGAAMLTFDALAETSEFARKWVPFCKKYSIEPRAPEWYFAQKIDYLDKDVQASVFKDRRAMKREYE  
EFKVRVNALVAKAQKVPEEGWIMQDGTWPWGNTRDHPGMIQVFLGHSGGLDTEGNELPRLVYVSREKRPGFQHH  
KKAGAMNALVRVSAVLTNGQYLLNLDCHYINNSKALREAMCFMMDPNLGRRCYVQFPQRFDGIDRNDRYANRNT  
VFFDINLRGLDGLQGPVYVGTGCVFNRTALYGYEPPKQKRPYFSSLCGGRKTKKSKEKSTEKKKSHKHVDSSVPVFN  
LEDIEEGIEGSGFDDEKSLMSQMSLEKRFQSSVFASTLMEYGGVPQSATPESLLKEAIHVISCYEDKSDWGTEIGW  
IYGSVTEIDLTGFKMHARGWRSIYCMKRPFAFKGSAPINLSDRLNQVLRWALGSVEILFSRHCPIWYGYGGRLKFLERFA  
YINTTIYPLTSLIPLLYCILPAICLLTGKFIPEISNFASIWFLSFLSIFATGILEMRWVSGV GIDEWWRNEQFWVIGGISAHLFA  
VFQGLLKVLAGIDTSFTVTSKASDEEGDFAELYMFKWTTLLIPPTLIINLVGVVAGISYAINSGYQSWGPLFGKLFFAFW  
VIVHLYPFLKGLMGRQNRTPITIVVWAILLASIFSLWVRIDPFTTRVTGPDTQKCGINC

>OS07G10770\_OsCesAMDGDADAVKSGRHGSGQACQICGDGVGTTAEGDVFAACDVCGFVPCRCYCYEYERKDG T  
QACPQCKTKYKRHKGSPAIRGEEGEDTDADDVSDYNYPASGSADQKQKIADRMRSWRMNAAGGGDVGRPKYDSGE  
IGLTKYDSGEIPRGYIPSVTNSQISGEIPGASPDHMMSPGTGNIKRAPFYVNHSPNPSREFSGSIGNVAWKERVDGW  
KLKQDKGAIPMTNGTSIAPSEGRGVGDIDASTDYNMEDALLNDETRQPLSRKVP LPSRRINPYRMVIVLRLVLSIFLHYR  
ITNPVRNAYPLWLLSVICEIWFALSWILDQFPKWFPINRETYLDRALRYDREGEPSQLAAVDIFVSTVDPMKEPPLVTA  
NTVLSILAVDYPVDKVCYVSDDGAAMLTFDALAETSEFARKWVPFVKYNIIEPRAPEWYFSQKIDYLDKDVHPSFVKD  
RRAMKREYEEFKVRINGLVAKAQKVPEEGWIMQDGTWPWGNTRDHPGMIQVFLGHSGGLDTEGNELPRLVYVSRE

KRPGFQHKKAGAMNALVRVSAVLTNGQYMLNLDCDHYINNSKALREAMCFLMDPNLGRSVCYVQFPQRFDGIDR  
NDRYANRNTVFFDINLRGLDGIQGPVYVGTGCVFNRTALYGYEPPKQKKKGSFLSSLCGGRKKASKSKKSSDKKSNK  
HVDSAVPVFNLEDIEEGVEGAGFDDEKSLMSQMSLEKRFQSAFVASTLMEYGGVPQSATPESLLKEAIHVISCGYE  
DKTEWGTGTEIGWIYGSVTEIDILTGFKMHARGWRSIYCMPPKRPFAFKGSAPINLSDRLNQVLRWALGSVEILFSRHCPWIYG  
YGRRLKFLERFAYINTTIYPLTSIPLLIYCVLPAICLLTGKFIPEISNFASIWFISLFSIFATGILEMRWWSGVGIDEWWRNEQF  
WVIGGISAHFAVFQGLLKVLGIDTNTFTVTSKASDEDGDAELYMFKWTTLLIPPTTILINLVGVVAGISYAINSGYQSW  
GPLFGKLFFAFWVIVHLYPFLKGLMGRQNRTPPTIVVVWAILLASIFSLLWVRIDPFTTRVTGPDTQTCGINC

>OS05G08370\_OsCesAMAANAGMVAGSRNRNEFVMIRPDGDAPPPAKPGKSVNGQVCQICGDTVGVSATGDVVFV  
ACNECAFPVCRPCYEYERKEGNQCCPQCKTRYKRHKGSRVVQGDDEEEDVDDLDNEFNKYGNGKGPWEQIQRQGE  
DVDLSSSRHEQHRIPRLTSGQQISGEIPDASPDRHSIRSGTSSYVDPSVPVPRIVDPSKDLNSYGINSDWQERVASW  
RNKQDKNMMQVANKYPEARGGDMEGTGSNGEDMQMVDDARLPLSRIVPIPSNQLNLYRIVILRLIILMFFFQYRVT  
HPVRDAYGLWLVSVICEIWFALSLLDQFPKWYPINRETYLDRALRYDREGESQLAPIDVFVSTVDPLKEPLITANTV  
LSILAVDYPVDKVSVCYVSDDGSAAMLTFEALSETAEFARKWVPFCKKHNIETRAPEFYFAQKIDYLDKIQPSFKERRAMK  
REYEEFKVRINALVAKAQKVPPEGWTMADGTAWPGNNPRDHPGMIQVFLGHSGGLDTDGNELPRLVYVSREKRPGF  
QHKKAGAMNALIRVSAVLTNGAYLLNVDCHYFNSSKALREAMCFMMDPALGRKTCYVQFPQRFDGIDLHDRYAN  
RNIVFFDINMKGLDGIQGPVYVGTGCCFNQALYGYDPLTEADLEPNIVVKSCCGRKKKSKSYMDSKNRMMKRTES  
SAPIFNMEDIEEGIEGYEDERSVLMSQKRLEKRFQSPIFIASFMTQGGIPPSTNPASLLKEAIHVISCGYEDKTEWGKEI  
GWIYGSVTEIDILTGFKMHARGWISYICMPPRPFKGSAPINLSDRLNQVLRWALGSVEILLSRHCPWIYGYNGRLKLLER  
LAYINTIVYPTSILAIYCVLPAICLLTNKFIPEISNYAGMFFILLFASIFATGILELRWWSGVGIEDWWRNEQFWVIGGTSAH  
LFAVFQGLLKVLGIDTNTFTVTSKASDEDGDAELVYFKWTSLLIPPTTVLVINLVGMVAGISYAINSGYQSWGPLFGKLF  
FSIWWILHLYPFLKGLMGRQNRTPPTIVVWSILLASIFSLLWVKIDPFISPTQKAVALGQCGVNC

>OS07G24190\_OsCesAMDEARQPLSRKVPPISSQINPYRMVIIIIRLVVLGFFFHYRVMHPVPDAFALWLISVICEIWFA  
MSWILDQFPKWFPPIERETYLDRLTLRFDEKQTSQALAPIDFFVSTVDPLKEPLVTANTVLSILAVDYPVDKVSVCYVSDDG  
AAMLTFEALSETSEFAKKWVPFCKKYSIEPRAPEWYFQQKIDYLDKVPYFVRERRAMKREYEEFKVRINALVAKAQK  
PEEGWTMQDGTWPWGNNVRDHPGMIQVFLGQSGGHDIENELPRLVYVSREKRPGYNHHKKAGAMNALVRVSAV  
LTNAPYMLNLDCDHYINNSKAIKEAMCFMMDPLVGKVCYVQFPQRFDGIDRHDRYANRNVFFDINMKGLDGIQ  
PIYVGTGCVFRRQALYGYDAPKTKPPSRTCNCWPKWCICCCCFGDRKSKKTKPKTEKKRSFFKRAENQSPAYALG  
EIEEGAPGAENEKAGIVNQKLEKKFGQSSVFASTLLENGGTLKSASPASLLKEAIHVISCGYEDKTDWGKEIGWIYGSV  
TEDILTGFKMHCHGWRSIYCIKLPFAFKGSAPLNLSDRLHQVLRWALGSVEIFFSNHCPLWYGYGGGLKCLERFSYINSIV  
YPFTSIPLLAYCTLPALICLLTGKFITPELTNVASLWFMFLFICIFATGILEMRWWSGVGIDDWWRNEQFWVIGGVSSHFLFAL  
FQGLLKVIAGIDTSFTVTSKGGDDEEFSELYTFKWTTLLIPPTLLLLNFIGVVAGVSNAINNGYESWGPLFGKLFFAFWVI  
VHLYPFLKGLVGRQNRTPPTIVVWSILLASIFSLLWVRIDPFLAKNDGPLLEECGLDCN

>OS03G62090\_OsCesAMEASAGLVAGSHNRNELVIRRDGEPGPKPVKHTNGQVCQICGDDVGLTPDGEPFVACN  
ECAFPVCRDCYEYERREGTQNCPCQCKTRFKRLKGCARVPGDEEEDVDDLENEFNWRDKTDSQYVAESMLHGHMSY  
GRGGDLGVPQHFQPIPNVPLLTNGEMADDIPPEQHALVPSFMGGGKRIHPLPYADPNLPVQPRSMDSKDLAAY  
GYGSVAWKERMESWKQKQERLHQMNRNDGGGKDWGDGDDADLPLMDEARQPLSRKIPSSSLVNPYRMIIIIIRLVV  
LGGFFHYRVMHPVPDAFALWLISVICEIWFAMSWILDQFPKWFPPIERETYLDRLTLRFDEKQTSQALAPVDFVSTVDP  
MKEPPLVTANTVLSILAVDYPVDKVSVCYVSDDGAAMLTFEALSETSEFAKKWVPFCKRYSLEPRAPEWYFQQKIDYLDK  
KVAPNFVRERRAMKREYEEFKVRINALVAKAQKVPPEGWTMQDGTWPWGNNVRDHPGMIQVFLGQSGGHDEGN  
ELPRLVYVSREKRPGYNHHKKAGAMNALVRVSAVLTNAPYMLNLDCDHYINNSKAIKEAMCFMMDPLVGKVCYVQ

FPQRFDGIDRHDYANRNVVFFDINMKGLDGIQGPYVGTGCVFRRQALYGYDAPKSKKPPSRTCNCWPKWCICCCCF  
GNRTNKKKTAKPKTEKKKRLFFKRAENQSPAYALGEIDEGAPGAENKAGIVNQQKLEKKFGQSSVFASTLLENGGTLK  
SASPASLLKEAIHVISCGYEDKTDWGKEIGWIYGSVTEIDLTGFKMHCHGWRSIYCIKRAAFKGSAPLNLSDRHLHQVLR  
WALGSIEIFFSNHCLPWYGYGGGLKCLERFSYINSIVYPWTSIPLLAYCTLPAICLLTGKFITPELTNIASLWFMSLFICIFATG  
ILEMRWSGVGIDDWWRNEQFWVIGGVSSHFAVFQGLLKVIAGIDTSFTVTSKGGDDEEFSELYTFKWTTLLIPPTLLL  
LNFIGVVAGVSNAINNGYESWGPLFGKLFPAFWVIVHLYPFLKGLVGRQNRTPPTIVIVWSILLASIFLLWVRIDPFLAKN  
DGPLLEECGLDCN

>OS07G14850\_OsCesAMEASAGLVAGSHNRNELVIRRDGGGGGGVGGRRAAEAKAACQICGDDVGEVGPDPGEFF  
VACNECAFVCRNCYDYERREGSQACPQCKTRFKRLKGCPRVAGDEEEDGVDDLEGEFGLDGREDDPQYIAESMLRA  
NMSYGRGGDLQPFQIPNVPLLTNGQMVDIPPEQHALVPSYMGGGGGGGKRIHPLPFADPSVPVQPRSMDSKDL  
AAYGYGSVAWKERMEGWKQKQERMQQLRSEGGGDWDGDADPLMDEARQPLSRKVPISRRINPYRMIIIRLV  
VLGFFFHYRVMHPVNDALWLVISVICEIWFAMSWILDQFPKWLPPIERTYLDRLSLRFDKEGQPSQLAPVDFVSTVD  
PSKEPPLVTANTVLSILSDYDYPVEKVSVCYVSDDGAAMLTFEALSETSEFAKKWVPFCKKFNIEPRAPEWYFQQKIDYLDK  
VAASFVRERRAMKRDYEEFKVRINALVAKAQKVPPEGWTMQDGPWPGNVNRDHPGMIQVFLGQSGGRDVEGNE  
LPRLVVVSREKRPYNNHHKAGAMNLRVSAVLSNAPYLLNLDCHYINNSKAIREAMCFMMDPLVGGKVCYVQFP  
QRFDGIDRHDYANRNVVFFDINMKGLDGIQGPYVGTGCVFRRQALYGYDAPKTKKPPSRTCNCWPKWCCCCCG  
NRHTKKKTTKPKPEKKKRLFFKKAENQSPAYALGEIEEGAPGAETDKAGIVNQQKLEKKFGQSSVFASTLLENGGTLKS  
ASPASLLKEAIHVISCGYEDKTDWGKEIGWIYGSITEDILTGFKMHCHGWRSIYCIKRAAFKGSAPLNLSDRHLHQVLRW  
ALGSVEIFFSKHCPLWYGYGGGLKFLERFSYINSIVYPWTSIPLLAYCTLPAICLLTGKFITPELTNVASLWFMSLFICIFVTGI  
LEMRWSGVAIDDWWRNEQFWVIGGVSSHFAVFQGLLKVLAVDTSFTVTSKAGDDEEFSELYTFKWTTLLIPPTLLL  
LNFIGVVAGVSNAINNGYESWGPLFGKLFPAFWVIVHLYPFLKGLVGRQNRTPPTIVIVWSILLASIFLLWVRIDPFLAKN  
NGPLLEECGLDCN

>OS09G25490\_OsCesAMEASAGLVAGSHNRNELVIRGHEEPKPLRALSGQVCEICGDEVGRTVDGDLFVACNECGF  
PVCRCPCYERREGTQNCPCQCKTRYKRLKGSRPVPGDEDEEDIDDLEHEFNIDDEKQKQLQQDQDGMQNSHITEAML  
HGKMSYGRGPDGDGNSTLPIITGARSVPVSGEFPISNSHGHGFEFSSSLHKRIHPYPVSEPGSAKWDEKKEVSWKER  
MDDWKSQKQIVAGGAPDDYDADVPLNDEARQPLSRKVSIASSKVNPYRMVILRLVVLGFFLRIRLHPVDAIPLW  
LTSIICEIWFVSWILDQFPKWYPIDRETYLDRLSLRYEREGEPSLLSAVDLFDVSTVDPLKEPPLVTANTVLSILAVDYPVDK  
VSCYVSDDGASMLTFESLSETAEFARKWVPFCKKFSIEPRAPEFYFSQKVDYLDKDVHPNFVQERRAMKREYEEFKVRIN  
ALVAKAQKVPAGWIMKDGTPWPGNTRDHPGMIQVFLGHSGGHDTEGNELPRLVVSREKRPGFQHHKAGAM  
NALIRVSAVLTNAPFMLNLDCHYINNSKAIREAMCFMMDPQVGRKVCYVQFPQRFDGIDVHDYANRNNTVFFDINM  
KGLDGIQGPVYVGTGCVFRRQALYGYNPPKGPKRPKMVTDCCCPCFGRKKRKHGKDLPEAVAADGGMDSKEML  
MSQMNFEKRFQSAAFVTSTLMEEGVPPSSSPAALLKEAIHVISCGYEDKTDWGLELWYIYGSITEDILTGFKMHCRG  
WRSVYCMKRAAFKGSAPINLSDRNLNQLRWALGSVEIFFSRHSPLLYGYKNGNLKWLRFYSYINTTIYPTSLPLLAYCT  
LPAVCLLTGKFIMPPISTFASLFFIALFISIFATGILEMRWSGVSIIEWWRNEQFWVIGGVSAHLFAVVQGLLKVLAVDIT  
NFTVTSKATGDEDEFAELYAFKWTTLLIPPTLLILNIIGVVAGVSDAINNGSEAWGPLFGKLFPAFWVIVHLYPFLKGL  
MGRQNRTPPTIVIVWSVLLASIFLLWVRIDPFTIKARGPDVRCGINC

>OS10G32980\_OsCesAMDTASVTGGEHKGKEKTCRVCGEVAAREDGKPFVACAECGFVCKPCYERSEGTQCC  
PQCNTYKRKHGCPVREGDEDDGGDMDDFEFFQIKSPTKQKPPHEPVNFDVYSENGEQPAQKWRPGGALSSFTG  
SVAGKDLEQEREMEGMEWKDRIDKWTKQEKRGKLNRRDSDDDDDKNDDEYMLLAEARQPLWRKVPPISSKINP  
YRIVIVLRLVLCFFLKRITTPAMDAVPLWLASVICELWFALSWILDQLPKWSPVTRETYLDRLALRYERDGEPCRLAPID



FFVSTVDPLKEPPIITANTVLSILAVDYPVDRVSCYVSDDGASMLLFDLSETAEFARRWVPFCKKFTIEPRAPEFYFSQKID  
YLKDKVQPTFKERRAMKREYEEFKVRINALVAKAQKKPEEGWVMQDGTWPWGNTRDHPGMIQVYVLSQSGALDV  
EGSELPRLVVYSREKRPGYNHKKAGAMNSLVRVSAVLTNAPFILNLDCDHVNNNSKAVREAMCFMLMDKQLGKKLCYV  
QFPQRFDGIDRHDYRANRNTVFFDINMKGLDGIQGPVYVGTGTVFNQALYGYDPPRPEKRPKMTCDCWPSWCCCC  
CCFGGGKRGKSHKNKGGGGGEGGLDEPRRGLLGFYKRSKDKLGGGAASLAGGKKGYRKHQRGFEEIEEGLEG  
YDELRSSLMSQKSFKRFQSPVFIASLTVEDGGLPQGAADPAALIKEAIHVISCYEEKTEWGKEIGWIYGSVTEIDILT  
GFKMHCRGWKSVYCTPARAAFKGSAPINLSDRHLHQVLRWALGSVEIFMSRHCPLWYAYGGRLKWLERFAYTNTIVYF  
TSIPLLAYCTIPAVCLLTGKFIPTLNNLASIWFIALFLSIATGVLELRWSGVSIEDWWRNEQFVWIGGVSAHLFAVFQGLL  
KVLGGVDNTFTVTSKAAADETDAFGELYLFKWTTLLVPPTLLIINMVGIVAGVSDAVNNGYGSWGPLFGKLFSSFWVIL  
HLYPFLKGLMGRQNRTPITIVLWSILLASIFSLVWVRIDPFIPKPKGPVLKPCGVSC

>OS06G39970\_OsCesAMDGESPEIMPVECPDPEPASSESGDDHDIPEPLSSRLSVPSGELNLYRAAVALRLVLLAAFFR  
YRVTRPVADAHALWVTSVACELWLAASWLIAQLPKLSPANRVTYLDRLASRYEKGEASRLAGVDVFVAAAADAAREPP  
LATANTVLSVLAADYPAGGVACYVHDDGADMLVFESLFEAAGFARRWIPFCRRHGVEPRAPELYFARGVDYLRDRAAP  
SFVKDRRAMKREYEEFKVRMNHAAARARKVPEEGWIMSDGTWPWGNNSRDHPAMIQVLLGHPGDRDVGDELPRL  
FYVSREKRPGRHHGKAGAMNALLRVSAVLNNGAYVNLDCDHCVNNSALREAMCFMMDPVAGNRTCFVQFALR  
DSGGGDSVFFDIEMKCLDGIQGPVYVSGCCFSRKALYGFEPAAAADDGDDMDTAADWRRMCCFGRGKRMNAMR  
RSMASVPLLEDSEDDSEEEEEAAGRRRRLRAYRAALERHFGQSPAFIASAFEEQRRRRGGDGGSPDATVAPARSLIKE  
AIHVVSFAFEERTRWGKEIGWMYGGGVATGFRMHARGWSSAYCSPARPAFRRYARASPADVLGASRRAVAAMGIL  
LSRRHSPVWAGRRLLQLRGLYVARASYPLASLPLTVYCALPAVCLLTGKSTFPSDVSYYDGVLLILLLSVAASVALELRW  
SRVPLRAWWRDEKLWMTATSASLAAVFQGILSACTGIDVAFSTETAASPPKRPAAAGNDDGEEEEALASEITMRWTN  
LLVAPTSVVVANLAGVVAAYGVVDHGYYQSWGALGAKLALAGWVVAHLQGFRLGLLAPRDRAPPTIAVLWSVVFVS  
VASLLWVHAASFSAPTAAPTTEQPIL

>GRMZM2G103972\_P01MAAAVTRRVGLHVEATNGGADDESRRNSSAADHSPVAKRINDAAANAKRNDVWVAA  
QEGEMPAAAGNSSQPPLFRMTMKVKSILHPYRFVILLRLVAIVAFFIWRIRNRNRDGVWLWAMSMVGDVWFGFSW  
VLNQLPKLNPIKRVPLDAAIRDQYEQPSASGGESNNKLPIDVFTTVDVDEPILYTVNSVLSILATDYPVEKYACYLSDD  
GGTLVHYEAMLEVASFARLWAPFCRKHSVEPRAPESYFGVKRRQPYTGSVQGEFTSDHRRMRREYEEFKVRIDSLFSTV  
CQRSQAYNRKHAKDDEAGMVMKATWMADGTQWPGTWIEQAENHRKGGHAGIVKVVNLNHPGHKPELGSPASIDN  
PFDFSNTDTRLPLMLVMSREKRTGYNHQKAGAMNAMLRVSAALLSNAPFLINFDCDHVNNNSQAFRASMCFMLDPR  
DGRNTAFVQFPQRFQDGDPTDRYANHNRVFFDGTMLSLNGLQGPSYLGTMFRRAALYGMPEPRWRTTGSVKVID  
DDDDHKGKEYGRSTLFRNAVLDAAANQERSITPVFLDDDETTISSEVASLMTCAVEDGTTWGRDVGWVYNIATEDVV  
TGFRMHRQGWRSMYCSVEPAAFRGTAPINLTERLLQVLRWSGGSLEMFFSHSNAFLAGARMHPLQRVAYLNMSTYP  
VVTVFILAYNLFPMLWLVSEYYYIQRPFQTYVLYLVATIAMIHVIGMFEVRWAGITLLDWCNEQFYMIGATGVYPTAV  
LYMALKLVTKSIHFRLTSKQTEACSGGDKFADLYVVRWVPLLPTIAVLAVNVAAVGVAVGKAATWGLLTQQAQHAL  
LGMVFNWVWILVLLYPFALGVMGRWGKRPAILFGVLVMAIGAVAVVYISFRATYYPTGWSEMETSALGKAESFF

>GRMZM2G113432\_P01MAPKAPANNGAVVAGGHHGGSTDVGGVAGGATTTTVPTSVAANGNGKQHGRTRKQ  
RRPAAVVVSPMDKYWTPVDDKEAAEAVDDGGEDGRRPLFRYKVKGILLHPYRLLTLRLIAIILFFIWRIRPHADGM  
WLWWISIVGDFWFGVTWLLNQVAKLNPTKRVPLDLSLLRQQFDLPDGNLNLPRLDVFINVDPINEMMIYTMNSILSILA  
VDYPIDRTATYLSDDGGSIIHYEGLLETANFATLWVPFCRKHSIEPRAPESYFAVKSRYPTGNVPEFADDHRRMSKEYD  
EFKVRDLALFTKIPERSDAHNAEAKGKATWMADGTQWPGTWFDPAENHKKGQHAGIVKVMNLNHPGDEPRFGGP  
ASAETPLDFAVDVRLPMLVYISREKSPSHDHQKAGAMNVQLRISALLTNAPFIINFDDGHVNNNSQAFRAAMCFML

DRRDGENTAFVQFPQRFDDVDPTDRYCNHNRVFFDATLLGLNGIQGPSYVGTGCMFRRIAVYGIDPPRWRTDAFKLV  
DNPSKFGSSMLFINSIPSAANQEWSMASPPAHEESVMEELNNVMKCAYEEGTEFGKEIGWVYNIATEDVVTGFRVHR  
TGWRSMYCRMEDAFRGTAPINLTERLCQILRWSSGGSLEMFFSHCPFLAGRRNLMQRIAYTNMTAYPISSVFLVYLL  
FPVIWIFRGEFYIQKPFPTYVLYLVVIAAMTELIGMVEIKWAGLTLDDWIRNEQFYIIGATAVYPLATLHIVLKLVLGRNGVS  
FKLTAKQATSAVNEKYAEMYVVQWTPLLIPTIAVIAVNVGAIGAAIGKAVVGGWSLLQMADASLGLVFNAWILLIYPF  
ALGVMGRWSKRPYILFVLFMIGFAVVAVVVAIHAARTGSVRFHSGHSGGASFPTS WGF

>GRMZM2G339645\_P01MASPAPAGDAVYAANGGLTDPLLVSANGHGAAARKAGHGARGRYWVASDKAERRAA  
KESGGEDGRALLFRKYKVKGALLHPYRLLIIIRLVAVLAFFAWRIRHNKSDIMWFWTMSIVGDVWFGFSWLLNQLPKFN  
PVKTIPLDALQRHFGYPDGGASRLPGIDVFVTTADPIDEPILYTMNCVLSILSVDYPVDRLACYLSDSGALVLYEALAEV  
GKFAPLWVPFCRKYSIEPRAPESYFEHVAPPQAGRVTQEFNDYRRVQMEYDEFKARLDNLPDAIRKRSVYNSVRDA  
GGAQKATWMANGTQWPGTWIDPAENHRKGHHAPIAKVVLNHPSTRGQHPITESNPSIATTDERLPMLVYVSREKNP  
GYDHNKKAGALNAQLRASALLSNAQLIINFDCDHYINNSQALSSAVCFMLDQRDGDNTAFVQFPQRFDNVDPTDRYG  
NHNRVFFDGTMLALNGLQGPSYLTGCMFRRLALYIDPPHCRAENITAEASRFGNSTIFLDSVSKALKNDRTITPPPID  
DTFLAELERVVTCYDKGTDWKGKGVYIYDIATEDIVTGFRIHGQGWRSMYCTMEHDAFCGVAPINLTERLHQIVRWS  
GGSLEMFFSHNNPFIGGRRIQPLQRVSYLNMVYVPTSVFILIYALSPVMWLIPDEVYIQRPFTRYVVYLLVIVMIHMIG  
WLEIKWAGVTWLDYWRNEQFFMIGSTSAYPMAVLHMAVNLLTKKGIHFRVTSKQTAADDNDKFADLYDFRWVPM  
IPTMAVLICNVGAIGVALGKTVVYIGTWTAAKKMHAALGLLFNIWIMFLYPFALAIMGRWAKRPIILVLLPVVVALVA  
LLYVGIHILLAGLIPF

>GRMZM2G367267\_P01MTMTSPQALSAGAVTVEDDGGGLAVPLADGSGATKTEEECGAEAEKGYWVADEAER  
QAVTDCGAEDGRALLFRKYKVKGALLHPYRLLIIIRLVAVLFFVWRIRNSASNMWFWATSVAGDAWFGFSWLLNQ  
LPKFSVPKSPDLAALRRHYDLLPADDGAASKLPGVDVFVTTADSVDEPVLTYMNSILSILATDYPADRLACYVSDSGA  
LVLYEALVEAAKFARLWVPFCRKHCVPRAPERYFETEPQGGRASQEFVNDYKRVQMEYDEFKVRNLNLPDITIRKSGT  
GSMRASEGDAQGTWMADGMQWPGTWMDPTEKHRKGHHAGIVKVVLDHHPSTRGHHGPRAGAGAGAENKQSD  
DFGAAAGLRLPMLVYVSREKDPNYDHNKKAGALNAQLRVSALLSNAQFVINFDCHYVNSQALRAAVCLMLDQRE  
GGDTAFVQFPQRFDNVDPTDRYGNHNRVFFDGTMLALNGLQGPSYLTGCMFRRIALYGVDPHCRQQLESVAPE  
PASKYKSTALIHVSSEAMGERERLTPPPVPLDVEMVVAASYDGGTDWKGKGVYIYGIATEDIVTGFRIHGKGWRS  
MYCTMRRDAFRGTAPINLTERLHQIVRWSGGSLEMFFSRNPLVGGQRLKLLQRVSYLNMVYVPTSLFILLYALCPV  
MWLVPEEVHIQRPFTRYVVYLLITILMIHMIGWLEMKWSGVAWLDHWRNEQFFMIGSTSAYPIALWHMAKLLTRK  
GIHFRVTSKQTTAGTDDKFADLYEMRWTPMLVPTAFVLVANVGAVGVAMGKALVYMGVWTVAQKTHAALGLLFNI  
WIMLLYPFALAIMGRWAKRPIILLVLLPAVFAVVGTIYVALHFLLANVIPI

>GRMZM2G110145\_P01MAAGQQASGGAKHGCVCGFPVCACAGAAVASAASSADMDRVAVAATEGQIGAVN  
DESWIAVDLSDDGLSADGADPGVALEDPRVFRTEKIKGVLLHPYRVLIFVRLIAFTLFVIWRISHRNPDALWLWVTSIAGE  
FWFGFSWLLDQLPKLNINRVPDLAALRQRFDRAGGGAGGGTSLPGLDVVTTADPFKEPILSTANSVLSILAADYPVE  
RNTCYLSDSGMLLTYEAMAEAAKFATVWVPFCRKHGIEPRGPESYFDLKSHPYMGRSQEDFVNDRRRVRKDYDEFK  
ARINGLDHDIKQRSDAYNAARGLKDGEPRATWMADGTQWEGTWVEPSENHRKGDHAGIVLVLNHPSHSRQLGPP  
ASADNPLDLSMVDVRLPMLVYVSREKRPGHNHQKKAGAMNALTRCSAVLSNSPFILNDCDHYINNSQALRAGICFM  
LGRSDTVAFVQFPQRFEGVDPTDLYANHNRIFFDGTLRALDGMQGPYYVGTGCLFRITLYGFDPPRINVGPCFPAL  
GGMFAKAKYEKPLELTTTAAVAKGKHGFLPMPKSYGKSDAFADTIPMASHPSFAAASAASVVADEATIAEAVAV  
CAAAYEKKTGWGS DIGWVYGTVEDVVTGYRMHIKGWRSRYCSIYPHAFIGTAPINLTERLFQVLRWSTGSLEIFFSRN  
NPLFGSTFLHPLQRVAYINITYPFTAIFLIFYTTVPALS FVTGHFIVQRPTTMFYVYLAIVLGTLILAVLEVKWAGVTVE

WFRNGQFWMTASCSAYLAAVCQVLVKKVFRDISFKLTSKQPAGDEKKDPYADLYVVRWTWLMVTPHIIIILVNIIGSAV  
AFAKVLDGEWTHWLKVAGGVFFNFVWVLFHLYPFAKGILGRHGKTPVVVLVWWAFTFVITAVLYINIPHIIHGPGGKHG  
GAIGHGGDAHHHGKFDGYLWP

>GRMZM2G122277\_P01MAPGGRRSNGETPTGQQQQQQADGRRGCACGGFPVCACAGAAVASAASSADM  
RVAVAATEGQIGAVNDESWAVDLSDDGLSSAADPGAVALERPFVFRTEKIKGVLLHPYRVLIFVRLIAFTLFVIWRISHR  
NPDALWLWVTSIAGEFWFGFSWLLDQLPKLNPINRVPDLGALRQRFD RADGTSRLPGLDIFVTTADPFKEPILSTANSIL  
SILAADYPVERNTCYLSDSGMMLTYEAMAEAAKFATVWVFPFCRKHGIEPRGPESYFELKSHPYMGRSQEDFVNDRRR  
VRRDYDEFKARINGLENDIRQRSDAYNAARGLKDGEPRATWMADGTQWEGTWVEPSENHRKGDHAGIVLVLNHPH  
HSRQLGPPASADNPLDLSMVDVRLPMLVYSREKRPGHGHQKAGAMNALTRCSAVLSNSPFILNLD CDHYINNSQA  
LRAGICFMLGRSDTVAFVQFPQRFEGVDPTDLYANHNRIFFDGLRALDGMQGPYVGTGCLFRRITLYGFDPPRINV  
GGPCFSLGGMFAKTKEYEKGLELTTKAAVAKGKHGFLPMPKSYGKSDAFADTIPMASHPSPFAAAAAVVAEEATIAE  
AVAVCAAAYEKKTGWGSDIGWVYGTVEDVVTGYRMIHKGWRSRYCSIYPHAFIGTAPINLTERLFQVLRWSTGSLEIF  
FSRNNPLFGSTFLHPLQRVAYINITTYPFTAIFLIFYTTVPALSFVTGHFIVQRPTTMFYVYLAIVLGTLLILAVLEVKWAGVT  
VFEWFRNGQFWMTASCSAYLAAVCQVLVKKVFRDISFKLTSKQPAGDEKKDPYADLYVVRWTWLMVTPHIIIILVNIIG  
SAVAFAKVLDGEWTHWLKVAGGVFFNFVWVLFHLYPFAKGILGRHGKTPVVVLVWWAFTFVITAVLYINIPHIIHGPGGK  
HGAIGHGAAHHGKFDGYLWP

>GRMZM2G164761\_P01MSTTYTTKSNGTTSDDNKWPKDHVKKASVDRPPLVRTTKLSTITIKLYRLMIILRMGIFVL  
FFKWRIGTALVMISSTGTDDKSTVLGMWVMSMAGELWFALMWVLDQVPMQPVRRVYLAALDEPMLPAMDFV  
VTTVDTEKEPPLVTVNTILSILAADYPAEKLTCYVSDDGALLTRDAVAEAARFSALWVFPFCRKHAVEPRNPEAYFSPGA  
SNGFKAWRADYKGTAWPELARRRRVRREYEELRLRIDALQAGGRAAVDAVAADRSCWRRGAAEDHAGAVELLVD  
NPGPGSTPRLGVSGTVDGVSNLLDLSVDVRVPALVYMCREKRRGRVNHGKAGALNALLRASAVLSNAPFILNLD CDH  
YVNSQALRAGVCHMLDGEENGNNDVAFVQFPQRF DGVD PADRYANHN RVFFDCTELGLDGLQGPIYVGTGCVFR  
RSALYGVDPPLWRPQGDDAGKGAANGIETGKLGVSTPFLRSVYAVLTNQSDQWDTVSISSPPCSFDAAAIGEATALVS  
CGYEDRTAWGRDIGWIYGTVEDVATGFCMHRRGWRSSYCATAPDAFRGTAPINLTDRLYQVLRWAAGSLEIFFSRN  
NALLAGRRLHPLQLRAYLNTTYPPTSIFLIAYCGLFPAIPLVTGNGATTGAFFSIIIRPPSATYIAFVAALMLTLAVVAVLEV  
RWSGISLGDWWRNQQFWMVSATSAYLAAVQVAKIAAGKEISFKLTSKQRATSTVASVKDRFAELYAVKWTVLMV  
PTAVVLAVNLSIVAAMEGGSWRDGPMAVFALAFNAYVVVHLYPFALGLMGRWSNTLSPLLLIIAFTVRLLCIVLYVQ  
ML

>GRMZM2G044269\_P01MSNPPPKAIRNPGGGAGGPAGGPRGPAGNTVKFARTSSGRYVSLSREDIDMEGELAA  
DYTNYTVQIPPTPDNQPMMDPASVAMKAEQYVSNLFTGGFNSVTRAHLMDKVIESEVTHPQMAGSKGSR CAMP  
ACDGKVMRNERGEDIDPCECRFKICRDCYLD AQKEGCLCPGCKEYKIGEYADDDPNDASSGKHYPGPGGMMNN  
SKSLLARNQNGEFDHNRWLFESSGTYGYGNAFWPKGGMYDDDLDEGGPGGGGGDGMLEQKPFKPLTRKIPMPT  
SIISPYRIFIVIRMFVLIFYLTVRVRNPMEALWLWGM SIVCELWFAFSWLLDMLPKVNPVNRSTDLAVLKEKFETPSPS  
NPHGRSDLPLDVFVSTADPDKEPVLTTATTILSILAADYPVEKLACYVSDDGALLTFEAMAEASFANIWVFPCKKH  
IEPRQPDSYFSIKGDPTKGRRSDFVKDRRKVKREFDEFKVRINGLPDSIRRRSDAFNAREDMKMLKHLRETGADPAEQ  
PKVKKATWMADGTHWPGTWAVSAPDHAKGNHAGILQVMLKPPSPDPLYGMHDEEQLIDFSDVDIRL PMLVMSRE  
KRPGYDHNKKAGAMNALVRCSAVMSNGPFILNFDCDHYINAYAQAIREAMCFVMDRGGIERIAYIQPQRFEGIDPSDR  
YANNNTVFFDGNMRALDGLQGPMYVGTGCMFRRFALYGFDPPTTEYTGWLFKKKVTTFGKADQGETDTQSLNSK  
GAEDFDAELTSMLVPRRFGNSSALMASIPVAEFQARPLADHPAVLHGRPPGSLTVPRPLDPPTVAEAVSVISCWYEDK  
TEWGDRVGWIYGSVTEDEVVSGYRMIHNRGWRVSYCIPKRDAFLGTAPINLTDRLHQVLRWATGSVEIFFSRNNAFLAS

RRLMFLQRVAYLNVGIYPFTSIFLLVYCFIPALSLSFGFFIVQTLNVAFLCYLLTITVTLIALGVLEVKWSGIELEDWWRNEQ  
FWLISGTSAHLYAVVQGLLKVMAGIEISFTLTAKAAVDDNEDIYADLYVVKWSSLLIPPITIGMINVIAIAFAFARTVYSDN  
PRWKGFIGGGFFSFVWLAHLYPFAKGLMGRRGKPTIVFVWVWGLSITISLLWVAISPPEASAGGRGAGFQFP

>GRMZM2G436299\_P01MASKGILKNSGSRMPQAGSRPPTAPTSAPTUVFGRRTDSGRFISYSRDDLDSEISSVD  
FQDYHVHIPMTPDNQPMDEDDSGTARAEDQRYVSGSLFTGGFNTVTRAHVMDKPDGDAAGRRGGGGAKGPSACM  
VEGCDARAMRDARGDDVLPCECDFRVCVDCFTDAVKAGAGVCPGCKEYKNTWEGLGAGAAEEVTRALS LPRGPA  
GANGHRMERRLSLVKQANVNQSGEFDHNLWLFQTKGTGYGNAIWPQDEADDDTDGGAPAGHPKELLTKPWRPLT  
RKLRIPAAVISPYRLLVLRLVALAFFLMWRIKHQNEDAIWLWGMSIVCELWFAFSWVLDQLPKLCPINRATDLSVLKEK  
FETPTPNPTGKSDLPGVDFVSTADPEKEPVLVTANTILSILAADYPVEKLACYLSDGALLTFEAMAEASFANLWVP  
FCRKHDIERNPDSYFNLRRDPFKNKVKPDFVKDRRRVKREYDEFKVRVNGLPDAIRRRSDAYHAREEIQAMNLQREKL  
KGGGDEPPFEPVKIPKATWMADGTHWPGTWLQPSQDHARGDHAGIIQVMLKPPSDMPTTMYDAASKTPLDLAGV  
DTRLPMLVYMSREKRPGYDHNKKAGAMNALVRASAIMSNGPFILNLDCDHYYNSKALREGMCFMMDRGGDRLCYV  
QFPQRFEGIDPSDRYANHNTVFFDVNMRALDGLQGPVYVGTGCLFRRIALYGFDPFRSKDHSPGFCSCCLPRRRKPSA  
ASREETMALRMGGFDGSDMLATFPKFKGNSSFLIDSIPVAEFQGRPLADHPSVKNGRPPGALTIPREMLDASIVAEAI  
SVVSCWYEEKTEWGIWVYGSVTEDEVVTGYRMHNRGWKSVYCVTQRDAFRGTAPINLTDRLHQVLRWATGSVEI  
FFSRNNALFASKMKVLQRIAYLNVGIYPFTSIFLIVYCFIPALSLSFGQFIVQTLNVTFLTYLLITVTLCLLAMLEIKWSGIAL  
EEWWRNEQFWLIGGTSAHLA AVLQGLLKVVAGIEISFTLTSKQVGDDEFAELYIVKWTSLMIPPLTIIMINLVIAIV  
GFSRTIYSTIPQWSKLLGGVFFSFVWLAHLYPFAKGLMGRRGRTPTIVYVWVWGLV SITISLLWIAIKPPSQAANSQFGGSF  
SFP

>GRMZM2G052149\_P01MASTGGGGGLRHSNSSRLSRMSFSGGSDDARAQAAAAPGGDRPMVTFARRTRSGRY  
VSYSRDDLSELGAAGVDMSPDRDEQFASYHVHIPATPDNQPMDPAISARVEEQYVNSLFTGGFNSVTRAHLMDKV  
IDSEASHPQMAGARGSSCAVNGCDANVMSDERGDDILPCECDFKICAECFADAVKNAGAICPGCKEYKNTLDDVV  
GAAADATAGRPTLSLPPPPGAAASRMERRLSIMRSQKAMTRSQTGDWDHNRWLFETKGTGYGNAIWPKENEVD  
AAGGLGGGGADGQPAEFTTKPWRPLTRKLSIPAGVLSPYRLLILIRMAVLGLFTWRIKHKNEDAIWLWGMSVVCCELW  
FGFSWLLDQLPKLCPVNRATDLAVLKDKFETPTPSNPTGRSDLPGLDIFVSTADPEKEPPLVTANTILSILAADYPVEKLSC  
YVSDGALLTFEAMAEASFANMWWVPFCRKHNIERNPDSYFNLKDPYKKNVRQDFVKDRRRVKREYDEFKVRIN  
GLPDSIRRRSDAYHAREEI KAMKRQREALDDAVEPVKIPKATWMADGTHWPGTWIQPSAEHTRGDHAGIIQVMLK  
PPSDDPLYGSTGDEGRPLDFTEVDIRLPMLVYVSREKRPGYDHNKKAGAMNALVRSSAVMSNGPFILNLDCDHYYNS  
QAFREGMCFMMDRGGDRIGYVQFPQRFEGIDPSDRYANHNTVFFDVNMRALDGLMGPVYVGTGCLFRVALYGF  
PPRSKEHGGCCSCFPQRRKIKASAAPEETRALRMADFEDEMNMSSFPKFKGNSSFLIDSIPIAEFQGRPLADHPGV  
KNGRPPGALTVPRLDASTVAEAVSVISCWYEDKTEWGHVGVWYGSVTEDEVVTGYRMHNRGWKSVYCVTKRDAF  
RGTAPINLTDRLHQVLRWATGSVEIFFSRNNALLASRRMKFLQRIAYLNVGIYPFTSIFLIVYCFIPALSLSFGQFIVKTLNV  
TFLTYLLVITLTLCLLAVLEIKWSGISLEEWWRNEQFWLIGGTSAHLA AVLQGLLKVVAGIEISFTLTSKSGDDVDDEFAD  
LYIVKWTSLMIPPVIMMNLIGIAVGFSTRYIYSEIPQWSKLLGGVFFSFVWLAHLYPFAKGLMGRRGRTPTIVFVWAGL  
LSITISLLWVAINPPSQNQIQIGGSFTFP

>GRMZM2G061764\_P01MHEGLGRWGLDSLKYGCHSNYTVRMPPTPDNQPYSVGGGAPLVCAGGTPDDLPLPP  
SKLVNRRGGACADDGLAGASGKMDRRLSTARVPAPSKSLLVRSQTGDFDHNWLFETRGTYGIGNAYWPQDSSAYA  
DDEDGGVGSDPVKMEDLVDPKPKLSRKVPIPPGILSPYRLLVLVRFISLFLIWRATNPNDALWLVGISIVCEFWFA  
FSWLLDQMPKLNPNRAVDLSALREKFESPTPSNPTGRSDLPGLDVFISTADPYKEPPLTTANLLSILGTEYPVEKLFVYIS  
DDGALLTFEAMAEACEFAKVVVFPFCRKHSEIERNPDAYFNQKGDPTKGGKRPDFVKDRRWIKREYDEFKVRINGLAD

LIRRRANAMNARERKIARDKAAAASSDAPVADASTVKATWMADGTHWPGTWLDSAPDHAKGDHASIVQVMIKNP  
HYDVVHGDAGSHPYLDFTGVDVRIPMFVYLSREKRPYDHNKKAGAMNAMVRASAILSNPFLNFDCDHYIFNCM  
AIREAMCYMLDRGGDRICYIQPQRFEGIDPSDRYANHNTVFFDGNMRALDGLQGPMYVGTGCLFRRYAIYGFNPPR  
TNEYRGIYQVKVPIDPHGHHAPGAAEELRPLSEHPDHEAPQRFGKSKMFIETIAVAEYQGRPLQDHPSVQNGRPPGA  
LLMPRPPLDAATVAESVAMISCWYEDGTEWGQRVGVYGSVTEDEVVTGYRMHNRGWRSVYCITRRDAFRGTAPINL  
TDRLHQVLRWATGSVEIFFSKNNALLASQRLKFLQRLSYLNVGIYPFTSLFLIMYCLLPALSLSFGQFIVATLDPTFLCYLLI  
TITLMLLCLLEVKWSGIGLEEWWRNEQFWVIGGTSAHLA AVLQGLLKVIAGIEISFTLAKAAAEDDDDPFAELYLVKWT  
SLFIPPLAVIGINIIALVGVSVRAVYAEIPQYSKLLGGGFFSFVWL AHYYPFAKGLMGRRGRTPTLVYVWAGLISITVSLLWI  
TISPPDDRITQGGVDV

>GRMZM2G015886\_P01MSRRLSLPAGSQVTVTSPTRGKAESP GDGVIKRSGGRIGLTSPAPRHSLGGAGSSTIPTV  
QLSPVRRSGGSRYASLDGGAGADDSAEFVHYTVHIPPTPERTVAASADSVDAPAPTAYDEDGGAAGVRAQRSYISGTIF  
TGGLNQATRGHVNTSANSAAVAASANMSCKMRGCDMPAFLSSGAGGGPCDCGFMICRECYADCVAAGNCPGC  
KEPYSAGSDTDDDDGEDDEAVSSSEERDQLPLTSMARFSLIHSKMPNSNNGGGGGKPAEFDHARWLFETKGTGYG  
NALWPKDGHGGGGGGGGGFSGFEEPPNFGSRCCRPLTRKTSISQAILSPYRLLIAIRLVALGFFLTWRIRHPNPEAVWLW  
ALSVTCEVWFVAFSWLLDSLKLCPIHRAADLDVLAERFELPTARNPKGHS DLPIDVVFSTADPEKEPPLVTANTILSILAA  
DYPVEKLACYLSDDGALLTFEALAEASFARTWVPFCRKHGVEPRCPEAYFGQKRDFLRNKVRVDFVRERRKVKREYD  
EFKVRVNSLPEAIRRRSDAYNAGEELRARRRQEEAMAAGTILGALPEAAGAVKATWMSDGSQWPGTWLTSAPDHS  
RGDHAGIIQAMLAPPTSEPVGAEPAESGGLIDTTGVDIRLPLMLVYSREKRPYDHNKKAGAMNALVRTSAIMSNGP  
FILNLDCDHVYHNSAALREGMCFMLDRGGDRVCYVQFPQRFEGIDPNDRYANHNLVFFDVAMRAMDGLQGPMYV  
GTGCVFRRTALYGFSPPRATEHHGWLGRRKIKLLLRKPTMGKKT DRENNSDKEMMLPIEDDAFQQLDDIESSALLPRR  
FGSSATFVASIPVAEYQGRLLQDTPGAHQGRPAGALAVPREPLDADTVAE AISVISCFYEDKTEWGRRIGWIYGSVTE  
VVTGYRMHNRGWRSVYCVTRRDAFRGTAPINLTDRLHQVLRWATGSVEIFFSRNNALFASPRMKFLQRVAYFNVGM  
YPFTSIFLLVYCVLPAVSLFSGKFIVQSLNATFLALLL VITITLCLLALLEIKWSGITLHEWWRNEQFWVIGGTSAHPA AVLQ  
GLLKVIAGVDISFTLTSKPGTGDDGEEDAFAELEYVRWSFLMVPVPTIMMVNAVAVAVASARTLYSEFPQWSKLLGGA  
FFSFVWLCHLYPFAKGLLRGRVPTIVFVWVWGLISMTISLLWVYISPPAGARELIGGGGFSFP

>GRMZM2G122431\_P01MEDGAEKATTPDSSSSQAAPPALSAVYVNRRLVAGNRAMA AVHVALVATVIGQRALALL  
SAGTSSASPASRLQVQHVMALADLTLLFWALSQSLWRPVTRAAFPGRLLAAVPRGALPRVDVLVVTADPDKEPP  
LGVVNTVVSAMALDYPGGKLSVYLSDDAGSPLTLLAARKAYAF AARAWVPFCRRHSVQCPWPDRYFAGDDDDADGD  
RRREELAEERARVRKLYEKLKADIEAAKNDETISGSWSKDRQNH DAYVEIIEDGDGVEEIPALVYVAREKRRAWPHHFK  
AGALNALLRVSGVVS NAPYVLVLD CDMACNSRASALDAMCFLLDRRPPDSLAFVQFPQLFHNLSHKDIYANELRYIFG  
TRWFGLDGVRGPPLSGSGFYVRRDALYGATPTADFM DATAVAELKTRFGHSDRLVASLRSPGPPEAEAMMSLAAL  
ASCAYEAGTAWGAGVGFMYQSVVEDYFTGFQRFARGWTSAYCYPEPRPAFLGSVPTNLNDVLVQNKRWMSGMLA  
VGVSRRHSPLACRPLL RASLLQAMAYAYFGFAALCAVPVLCYATLPQLCLLRGVPLFPCPAATAAAFASLLQHMAEVC  
VSRGRDLRTRWWNEQRFVWLNALTAQLFGCVSAAQELLGARALDFDLT SKAAVDGSLYQDGVDFDFTGCSALLPAT  
TSLVLNAAAIVAGTWKMSSSSSSSGGFHFAPQLFLMCYGAALSYPLLEGMFLRRDPARVPPRITALSVALAAVLLAAM  
LG

>GRMZM2G012044\_P01MAGSSVRGGSNCPPFLVTEKPTRMARYAYRLFASTVLAGVLLVWLYRATHVPPMSSGAR  
WWAWLGLSAAELWFGFYWVLTLSVRWSPVFRRAPDQLLRRYKEEQLPGVDFVCTADPTVEPPMLVISTVLSVMAY  
DYPKEKLNLYLSDDAGSIITLYALYEASEFAKHWLPFCNKYQVEPRSPAAYFGTEASPPDACDRKEWFSLKEMHKDLAAR  
VNSVVNSGKIPEVSKCKLMGFSRWSENASFRDHPSIVQILIDGNKRKATDVDGKVLPTLYVMAREKRPQEHFFFKAGSL

NALIRVSSVISNSPVMNVDCDMYSNNSGSIIRDALCFQDEQLGQDIAFVQYPQNFENVVQNDIYGNPINTVNELDHP  
CLDGWGGMCYYGTGCFHRREALCGRIYSPDYKEDWTRVARKTEDVIDLEGMAESLVTCTYEHNTLWGVKEKGVYIGCP  
LEDVITGLQIQCRGWRSVYHNPPRKGFLGMAPTSLGQILVQHKRWTEGFLQJLSKYSPELLGHRKISLGLQMGYSVCG  
FWAANSFPTLYYVTIPSLCFLNGISLFEITSPWFVPFAYVAVAAYSCLVESLQCGDTAVEWWNAQRMWLFRRITSYLL  
AAIDTIRRMGLVTESGFTLTAKVTDPRALERYKKGMMFEGSFSVMFAIITTVALLNLACMMLGVAKVLLRKGAVSLGA  
MFVQAVLCALIVAINFPVYEAMFVRKDSGRLPASVSVVSLCIVLPFCILPTKL

>GRMZM2G014558\_P01MEERLFATEKHGGRALYRLHAVTVFLGICLLLCYRATHVPAAGSGGRAAWLGMLAAELW  
FGFYWVITQSVRWCPIRRRTFHDLAARFGERLPCVDIFVCTADPRSEPPSLVVATVLSVMAYNYPPAKLNVYLSDDGG  
SILTFYALWEASAFKHWLPFCRRYGVPRSPAAYFAQSDEKPRHDPPHALQEWTSVKNLYDEMTERIDSAARTGNVP  
EETRAKHKGFEWDTGITSKDHHPIVQILIDGDKAVADNEGNVLPRTLTVVAREKRPQYHHNFKAGAMNALIRVSSVIS  
NSPIILNVDCDMYSNNSDTIRDALCFLLDEETGHRIAFVQYPQNYNNLTKNNIYGNLSNVINQVELSGLDAWGGPLYIGT  
GCFHRRETLCGRRFTEDYKEDWDRGTKEQQQHRHRVDGETEAKAKSLATCAYEHDDDDTRWGDEVGLKYGCSVEDVIT  
GLAIHCRGWESVYSNPARAAVGVAPTTLAQTILQHKRWSEGNFGIFVSRYCPVFGRRGKTRLPHQMGYSIYGLWAP  
NSLPTLYYAVVPSLCLLKGTPFELTSPWIAPFVYVAVAKNVYSAWEALWCGDTLRGWWNGQRMWLVRRRTSYLYG  
FVDTVRDSLGLSKMGFVSSKVSDEDEAKRYEQEMMEFGTASPEYVIVAVALLNVLCLAGMAAALDVFFVQVALCG  
VLVLLNVPVYEAMFVRKDRGRMPFPITLASVGFVTLALIVPFF

>GRMZM2G028286\_P01MAPWSGFWGGKPGDAYRGTPVVVKMENPNWSISEISSPEDDDEDILAAAAAGRRN  
KGGRTKNAKQIRWVLLLKAHRAAGCLASLASAAVALGGAARRRVAAGRTDAEAGVVAAGESPVRSRYFAFIKAFV  
VLLLLAVEVAAYFNGWDLAASALALPAIGLESYASWLRFRATYVAPGIQFLTDACVVLFIQSADRILQCLGCFYIHKRI  
KPKPRSLALPDAEDPDAGYPMVLVQIPMCNEKEYVQSQIAAVCNLDWPKSNFLVQLDSDDDPLTQTLIREEVAKW  
QQQGARIVYRHRVLRDGYKAGNLKSAMSCSYVKEYEFVAIFDADFQPHDFLKRTPHFKDNDELGLVQARWSFVNK  
DENLLTRLQYINLCFHFEVEQQVNGVFLNFFGFNGTAGVWRIKALEDSSGWLERTTVEDMDIAVRAHLHGWKIFLND  
VECQCELPESYEAYRKQQRHWHSGPMQLFRLCLPDIKCKIAFWKKANLIFLFFLLRKLILPFYSFTLFCIILPMTMFVPEAE  
LPDWVVCYVPALMSLLNILPSPKSFPIPYLLFENTMSVTKFNAMISGLFQLGSAYEWVVTKKSGRSSEGDIALAPPKEP  
VKHATRTGSAPNLDAVAKEEQQQQLAASRKDAAKKKEKHNRIYKELALSMLLLTAAARSLLSKQGIHFYFLLFQGV  
SFLLVGLDLIGEQUE

>AC183932.3MAPCSGLWGGKAGDAYRGTPVVVKMENPNWSISEISSPEDDDDEDILAAAGRRRRKGARTKNAK  
QIRWVLLLKAHRAAGCLASLASAAVALGAAARRRVAAGRTDADADADAGVLAVAGESPVVRSFYAFIRAFVLSLLL  
AVEVAAYINGWDLAASALALPALGLESYASWLRFRAYVAPGIQFLTDACVVLFLVQSADRILCLGCFYIRVKRIKPEPK  
SPALPDAEDPDAGYPMVLVQIPMCNEKEYVQSQIAAVCNLDWPKSSFLVQLDSDDDLTLQALIREEVAKWQQQGA  
RIVYRHRVLRDGYKAGNLKSAMSCSYVKDYEFVAIFDADFQPPDFLKRTPHFKDNDELGLVQARWSFVNKDNLLT  
RLQYINLCFHFEVEQQVNGVFLNFFGFNGTAGVWRIKALEDSSGWMERTTVEDMDIAVRAHLHGWKIFLNDVECQ  
CELPESYEAYRKQQRHWHSGPMQLFRLCLPDIKCKMAFWKKGNLILFFLLRKLILPLYSFTLFCIILPTAMFVPEAELPD  
WVVCYVPALMSLLNVLPSRSPFPIPYLLFENTMSVTKFNAMVSGLFQLGSAYEWVVTKKS GSGRPSSEVAGDLVSLA  
AAAPTAKKKKKKHNRYYKELALSMLLLTAAARSLLSKQGIHFYFLLFQGV SFLLVGLDLIGEQUE

>GRMZM2G074792\_P01MRARLDYLAPPLQFLTNACVLLFLVQSVDRVLCLGCFWIKLKGVRPVPPLPADKEDVEAG  
PDGVPMLVQMPMCNEREVYQSIGAVCSLDWPRSNFLVQLDSDDDATTSALIKEEVEKWQREGVRIVYRHRVIRD  
GYKAGNLKSAMNCSYVKDYEFVIFDADFQPPADFLKRTPHFKGKDDVGLVQARWSFVNKDNLLTRLQYINLCFH  
EVEQQVNGAFLNFFGFNGTAGVWRIKALEESGGWMERTTVEDMDIAVRAHLKGWKFLFLNDVECQCELPESYEAYR

KQQHRWHSGPMQLFRLCFVDIIKSKIGFWKKFNLFLLRKLILPFYSFTLFCVILPMTMFVPEAELPAWVVCYIPATM  
SILNILPSPKSFPIVYPYLLFENTMSVTKFNAMVSGLFQLGSAYEWVVTKKSGRSSEGLVALVEKHSKQQRVGSAPNLD  
ALTKEKSGTEEEKNKKRKKKHNRIYRKELALSLLLLTAAARSLLSAQGVHFFYLLFQGVSVFLVGLDLIGEVD

>GRMZM2G454081\_P04MVQWWGREASGGRGTSVVVKMESPEWTIPAEEVAAGGKAGRGKRNARQITWVLLK  
AHRTAGKLTGAASAVLSIAGAAWRRVAAGRTDEDEDEDAGAAPPGESPALRSFYGFLRASLVLSVLLAADVAHLQ  
GWHLAVDVPDLLAVEGLFAAGYASWARVRLEYLAPALQFLANACVLLFLVQSADRILCLGCLWIKHRGIRVVPKAGGK  
GSDDVEAGTGNFPMVLVQIPMRNEKEVYQQSIGAVCGLDWPRPNFLVQVLDSDDAATSTLIKEEVEKWQREGVRIL  
YRHLIRDGYKAGNLSAMNCSYVKDYEFVIFDADFQPPDFLKRTPHFKGNEDVGLVQARWSFVNKDENLLTRLQ  
NINLCFHFEVEQQVNGIFLNFFGFNGTAGVWRIKALEDSGGWMERTTVEDMDIAVRAHLKGWKFLFLNDVECQCELP  
ESYEAYRKQQRWHSGPMQSDSGRKFNLIFLLRKLILPFYSFTLFCIILPMTMFIPEAELPAWVVCYIPATMSLLNILP  
APKSFPIVYPYLLFENTMSVTKFNAMVSGLFQLGSAHEWVVTKKSGRSSEGLVVEKQPRQQRAGSASNLGSLAKEPSS  
SLRKDSQRKHNRIYRKELALSLLLLTAAARSLISVQGIHFYLLFQGDCAKGNPEKGMFCMSASVECLRALFVNARA  
QITCGSRTVIFQPTCPAVMVERDRVSGELGKGFRRNPSPTNGASNSERRLCLENSYSRSCSQGGDRCVNRCRYGCCFR  
SANIFIRRLGLHLVSLPLPVFQSPCLLSLAGSVRMQSDLRTV

>GRMZM2G027794\_P01MPQWWGREARGGGGGGGTSVVVKMESPDWAVREPEAARGKAGRGKRNARQITWVLL  
LKAHRAAGKLTGAASAALSVAAAARRRVAAGRTDADADAGAGAGAAPHGESPALRTRLYGFLRASLVLSMLLLAADV  
AAHLQGWHLAVDVPDLLAVEGLFAAGYASWVRVRLQYLAPALQFLANACVLLFLVQSADRILCLGCLWIKLRGIKPV  
PNAAGKGPDDVEAGTGEFPMVLVQIPMCNEKEVYQQSIGAVCGLDWPRPNFLVQVLDSDDAATSALIKEEVERWQ  
REGVRILYRHRVIRDGYKAGNLSAMNCSYVKDYEFVIFDADFQPPDFLKRTPHFKGNEDVGLVQARWSFVNKDE  
NLLTRLQNINLCFHFEVEQQVNGIFLNFFGFNGTAGVWRIKALEDSGGWMERTTVEDMDIAVRAHLKGWKFLFLNDV  
ECQCELPESYEAYRKQQRWHSGPMQLFRLCFVDIIKSKIGFWKKFNLFLLRKLILPFYSFTLFCIILPMTMFIPEAELP  
AWVVCYIPATMSLLNILPAPKSFPIVYPYLLFENTMSVTKFNAMVSGLFQLGSAYEWVVTKKSGRSSEGLDIALVEKQPK  
QQRVGSAPNLES�TKESSLSKRSKRKHNRIYRKELALSLLLLTAAARSLLSVQGIHFYLLFQGVSVFLVGLDLIGEVE

>GRMZM2G142685\_P01MAPPPSSWWGSEEQRGTPVVVKMDNPYSLVEIDGPGMPPSDKARGKNAKQFTWVLLL  
RAHRAVGCVAWLAGGFVGVLGAVNRRVRRSRDADDEPDAEASGRGRVMLRFLRAFLLLSLAMLAFETVAHLKGWQ  
FPQHLMPGNLQELEEQLQHLPEHLRHLPENLRQLPDHLRVPERQEIQGWLHRAYVAWLEFRVDYIAWAIQKLSTFCILL  
FMVQSVDRIVQCLACFWIKIRIGIKPRIPASAGGKPRGGTTGRKRVDVENDADDDRYFPMVLVQMPMCNEKEVYE  
TSISHVCQMDWPRDRLLIQVLDSDDEVQMLIKAEVTKWSQRGVNVIYRHLSRTGYKAGNLSAMACDYVKDYEF  
VAIFDADFQPNPDFLKLTPHFKENPELGLVQARWSFVNKDENLLTRLQNINLCFHFEVEQQVNGVYLNFFGFNGTAG  
VWRIKALEDSGGWMERTTVEDMDIAVRAHLNGWKFLFLNDVVKLCELPESEAYRKQQRWHSGPMQLFRLCIPTVF  
RSKIPFWKKANLVMLFFLLRKLVLFPYSFTLFCVILPLTMFVPEAELPIWVICYIPVLSILNILPAPKSFPIVYPYLLFENTMS  
VTKFNAMVSGLFQLGSSYEWIVTKKAGRTSSASDILALAEADAHAPAPAAKLVRGVSEGGLOEWGRLREQEAAEW  
ANKEDAAAAALAAAAAPATPKSSNKAKKPPNRIFFKELALACLLTAATRSLLSKQGLHFYLLFQGVTFVAVGLDLIGE  
VS

>GRMZM2G173759\_P01MAPGLRLAYPWGRDVRRTGTPVVVTMENPNYSVVEIDGPEAEALRAGVPPMDKGRGRG  
RSAKQFTWVLLLRAHRAAGCLASLAAVTWALPSAVAKRFRRAAAAEGVGRGRGWLLYRFIKVLLALSLLALTVELAAYW  
KGWHFQRPNLTMPFHVPEVEDIQWLHTAYLAWMSFRADYIRRIEFLSKVCILLFVVQSLDRLVLCIACFWIKLKKIK  
PRLEGDPFREGSGYLHPMVLVQIPMCNEKEVYEQSISAVCQLDWPRDKFLIQVLDSDDESQMLIKAEVSKWNQQGV  
NIVYRHRVLRRTGYKAGNLSAMSCDYVKNFEFVAIFDADFQSTDFLKTIPHFDGNPELGLVQARWSFVNKDENLLTR

LQNINLCFHFEVEQQVNGVFLNFFGFNGTAGVWRIQALEESGGWLERTTVEDMDIAVRAHLNGWKFIPLNDVKVLC  
VPESYEAYRKQQRHWHSGPMHLFRLCFDITAKISSWKKANLILLFFLLRKLILPFYSFTLFCVILPLTMFVPEAELPVWVI  
CYVPICMSFLNILSPRSFPFVYPYLLFENTMSVTKFNAMVSGLFKLGSSYEWVVTCKSGRSSELDLLTSEEKNRKCTTL  
LQNLQNPENSELVEINVRKEQREKVPNDAKRGNKIYKKEALSLLLTAATRSLLSAQGIHFYLLFQGMFLAVGLDLIGE  
QIS

>GRMZM2G135286\_P01MAPSSWWGGEDQDGTVPVVKMDNPYSVEIDGLGVPPADKARGKNAKQFTWVLLL  
RAHRAVGCVAWLAGGFVGLGAVNRRVRRSRDADDEPDAEASGRGRAMLRFLRAFLLSLAMLAFETVAHLKGWQ  
FPQHLPGNLQEEELQLHLPEHLRHLPENLRQLPDHLRMPERQEIQGWLHRAYVAWLEFRVDYIAWAIQKLSFCILL  
MVQSVDRIVQCLACFWIKIRGIKPRVPASGGKPRGTTGRKSADAENGFADGDADGYFPMVLVQMPMCNEKEVYETSI  
SHVCQIDWPRDRLLIQVLDDSDDEVCRMLIKAEVTKWSQRGVNVYRHRSLRTGYKAGNLKSAMACDYVKDYEFVAIF  
DADFQPNPDFLKLTPHFKENPELGLVQARWSFVNKDENLLRLQINLCFHFEVEQQVNGVFLNFFGFNGTAGVWR  
IKALEDSGGWMERTTVEDMDIAVRAHLNGWKFIPLNDVKVLCPELPEYQAYRKQQRHWHSGPMQLFRLCIPAVFRSKI  
PFWKKANLVMFLFFLLRKLVLFPYSFTLFCVILPLTMFVPEAELPIWVICYIPVLMSSLNILPAPKSFPFVYPYLLFENTMSVTK  
FNAMVSGLFQLGSSYEWVTKKAGRTSSASDILALAEADSHAPLPPAKLVRRVSEGGLEQWSRLREQETAEWANKEE  
AAAAALAAAAPATPKMTRKTKKPNRIFKELALACLLTAATRSLLSKQGLHFYLLFQGVTFVAVGLDLIGE  
QV

>GRMZM2G405567\_P02MGAAAAGGHALRAVGDVVSFPATVAAFVEALLQGWAEARAGLLVPLRAAVLLCTAMS  
LIVLAEKVFLGAVSSVAKLRRRRPGRVCRCDPDEEAAAASQAYPMVLVQIPMYNEREVYQLSIEAACRLTWPVDRLIVQ  
VLDDSTDSVIKELVKGECERWATEEGINVKYETRKDRAGYKAGNLKEGMRHAYVRACEFVAMFDADFQPPDFLVRTV  
PFLVHNPSLALVQTRWKFVNANDCLLTRMQEMSMDYHFKEQEAGSSLCNFFGYNGTAGVWRTQAIVESGGWEDR  
TTAEDMDLALRAGLLGWFEVYVGSIKVKSELSTLKAYRSQQHRWSCGPALLFKKMFQWQILAAERVSVWKKWYMVY  
DFFIARRIVGTFYFFFFSVLIPLNILLPEAQIPVWELIYIPIAITLLNSVGTPRSILVILWVLFENVMALHRFKAILIGFLEADR  
ANEWIVTQKLGNLQKLSIARLTGSYRFKDRFHFLFVFIGLFLASACFDYLYRDDYVYLVLPQSIMYFAIGFQVGLNVS  
ED

>GRMZM2G020742\_P01MTLDYHFKEQEAGSSTFGFFGFNGTAGVWRTSSIKEAGGWEDRTTVEDMDLAVRAGL  
KGWKFIYVGDVKVSELPSNLKAYRRQQRHWTCGAANLFRKMGAEIILKEVSLWRKLYLIYFFFIRKVVAVHVPFMLY  
CVIIPSLVLIPEVTPVWGVVYIPTITLTYAIRNPSSIHFIPIFWILFENVMSFHRTKATFIGLLELGNVNEWVTEKLGRTKP  
VPQMLEKPRCFWDRCTISEILVAIFLFFCATYNLVLGDDFYFVYIYLQEI AFLIVGTGFCGT

>GRMZM2G108600\_P03MGGVRGHSSAAGVSEAAAAAAWVWAAADLPVRVDWAGAAAQCASLWAHARALLV  
VPAVRLVALSLAMTVMVLAEKLFVCAVCVAVRAFRLGPHRRYRWEPIAAAAAVGYPVVLVQIPMYNEREVYKLSIG  
AACALEWPPERFVIQVLDDSTDPVVKDLVETECQRWWSKGVNIKYEVRGNRKGKAGALKEGLKHBYVADCEYIAMFD  
ADFQPDSDFLRTIPFLVHNPEIALVQARWKFVNSDECLLTRFQEMSLDYHFKEQEAGSSVYFFGFNGTAGVWRISAI  
DDAGGWKDRTTVEDMDLAVRAMLQGWKFLYVGDIVKSELSTFKAYRFQQRHWSCGPANLFFKMMVEILENKRV  
SLWSKIHLWYDFFVGVKAAHTVTFIYYCFAIPVSVLFPEIQIPLWGVVYVPTVITLLKALGTPSSFHLVILWVLFENVMSL  
HRIKAAVSGLLDAGGRVNEWVTEKLGDTSKAKPGTNGSDTAVKVIDVKLTEPLVPKLVKRRARFWERYHCSELFVGT  
C IILCGFYDLLFANKGYIIFLQGTAFVVGFGYVGTLPCTA

>GRMZM2G099088\_P01MAADLVETECQRWWSKGVNIKYEVRGNRKGKAGALKEGLKHBYVEDCEYIAMFDADF  
QPEPDFLLRAVPFLVHNPEIALVQARWKFVNSDECLLTRFQEMSLDYHFKEQEAGSSLHSFFGFNGTAGVWRISAI  
AGGWKDRTTVEDMDLAVRAMLQGWKFLYVGDIVKSELSTFKAYRFQQRHWSCGPANLFFKMMVEILENKVSL



WSKIYLWYNFFVVGKVAHAHTVTFIYYCCAIPVSVLLPEIQIPLWGVVYIPTLITLLKALGTPSSFHLVILWVLFENVM SLHRI  
KAAASGLLDAGGRVNEWVVEKLGDTSKAKPGANGSDDVKVIDVKLTEPLVPKLVKRRARFWERYNCSELFVGT CILLC  
GFYDLLFAKKGYIFLFLQGTAFLLVVGFGYVGTLP HCNA

>GRMZM2G010142\_P02MEAGEIGGALVFILAAAAVAAAVSVGAVDFSRPLTAGAPDFDQAAVSWLIGILDGTSSA  
AADVDGAWVAVRAGVIAPVLQVAVWACMVMSVMLVVEAVYNSVISLGVKAIGWRPEWRFKWKPLDSADEEKGTA  
HFPMVLVQIPMYNELEVYKLSIAAACELQWPKDRIVIQLVDDSTDPFIKNLVELECEHWVNKGVNIKYATRTRSRKGFKA  
GALKKGMCEDYAWQSEYIAIFDADFQPEPDFLLQTVPFLLHNPEVALVQARWSFVNDTSSLTRVQKMFYDYHFKVEQ  
EAGSATFAFFSFNGTAGVWRTGAIRDAGGWKDRTTVEDMDLAVRATLKGWKFVYVGDVRVKSELPSTYKAYCRQQF  
RWSSGGANLFRKMAKDVLFADKISLVKKFYMLYFFFVRRVAPTAACILYNVIIPISVTIPELYLPVWGVAYIPMVLTVV  
TAIRHPKNLHILPFWILFESVMTLHRMRAAMTGLLELEGFNQWIVTKKVGNDLEDTEVPLLQKTRKRLRDRVNLPEIGFS  
VFLFLCASYNLVFHGKTSYLYMYLQGLAFLLGFNFTGNCSYQ

>GRMZM2G115772\_P01MAAWAVPALAAAALRAAVWACLAASAMLVAAEAYMGLASLASAAAMLWRRPDA  
RWRWEPMPGGCDVEAATGADFPMLVQIPMYNEREVYKLSIDAACALTWPPDRIVIQLVDDSTDPPIKELVELECQDW  
ATKKNIKYEVRRNRKGYKAGALKKGMHIYAKQCEFVAIFDADFQPEPDFLLKTIPFLVHNPKIALVQARWEFVNYDVC  
LMTRIQKMSLDYHFKVEQESGSFVYFFFNGTAGVWRVSAINQSGGWKDRTTVEDMDLAVRASLKGWEFLYVVDI  
RVKSELPSTFKAYRHQQHRWTCGAANLFRKMAWEIITNKEVSIWKKHLLYFFFVRRVIAPLVTFLFYCVVIPLSAMVP  
GVSIPVWGLVYIPTAITCMNAIRNPWSLHLMPFWILFENVMMSHRMRAAVTGLLETARANDWVVEKVGDLVKDDL  
DVPLLEPVKPTCEVERIYFPELLLALHLLICASYDFVLGSHKYYLYLQAFAYVVMGFGFVGTKTPCS

>GRMZM2G178880\_P03MELEGPWARVLHLHDACEWGRAVRARAVAPALEAAAACLAMSVMLVLEVCYMSVS  
SFVAVNLLRRTQPRRYSWEPMPSTARGDDEAAVGDGGGEAYPMVLVQIPMYNEREVYKISIGAACALTWPPDRIII  
QVLDSTDPFIKELVEFECKDWASKKINIKYEIRESRKYKAGALKKGMESYAQECDFVAIFDADFQPDFLLRTIPFL  
VHNPKIALVQTRWEFVNYNICLLTRIQKMSLDYHFKVEQESGSSVHAFFGFNGTAGVWRVSAIGEAGGWKDRTTVED  
MDLAVRASLKGWQFLYVGDIFRFVQVSELPSTFKAYRHQQHRWTCGAANLFRKMAGDIVISKGATVWKKLHLLYSSF  
FVRRVIAPILTLFYCVVIPLSVMVPEVSIPAWGMFYIPTAITIMTAIRNPW

>GRMZM2G424486\_P01MSCVRNEASGQTGSVYRLSIGAACGMSWPSERLVIQLVDDSTNPAIRELVEVECARWAR  
KGVRCYENRSNRNGYKAGAMREGLKKHYARDCEYVAIFDADFQPDSDFLRRTVPLLQRDPGVGLVQARWRVYNADE  
CILTRIQEMSLNYHFAVEQEVGSACHAFFGFNGTAGVWRVAALADAGGWKERTTVEDMDLAVRASLRGWRVYVVG  
DLVVRNELPSTFKAYRYQQHRWSCGPANLFRKVLPEILRSRVS LGKKFHLLYAFFVVRKVVHLVTLFYCVVIPACVLV  
QGDVRLPKYVAMYVPALITLLNAACTPRSCHLLIFWILFENVMMSHRSKAAIIGLEASRANWVVTDKLGSSKAAA AV  
VAKKKKQQLVRSRCCSTRREMHVLELAMGVCLLYCAVYDIVFFGRDHYYMYLLLQSAAAFIVGFGYVGTTPS

>GRMZM2G105631\_P01MDALPEAWSQVRAPVIVPLRLAVAVCLTMSVLLFLERVYMAVVISGVRLRLRPDRRYR  
CDPLPEDDPELGSSAFVVLVQIPMFNEREVYQLSIGAVCGLSWPADRLVVQVLDSTDEVIKEMVRMECERWARKGI  
NITYQIREDRKGYKAGALRAGMRHAYVRDCEYVAIFDADFQPDFDYLRKRTIPYLVHNPEIALVQARWRVYNADECLMT  
RMQEMSLDYHFTVEQEVSSVCAFFGFNGTAGVWRISAVNEAGGWKDRTTVEDMDLAIRASLKGWKFVYLGVDVQV  
KSELPSTFKAFRFQHRWSCGPANLFRKMLMEIVTNKKVTIWKKIHVIYNFFLIRKIIAHIITFSFYCVIIPATIFVPEVRIPK  
WGCYVIPSAILLNSVGTPRSFHLLFFWAFENVM SLHRTKATLIGLEAGRANWVVTAKLGSAMKMK SANKAGLRK  
QFMRIWERLHVTELGVAAFLFSCGWYDLAYGRDHFFIYFFQSVAFFIVGVGYVGTIVPQS
