# Supplementary material for: Genome-wide analysis of the cellulose synthase-like (Csl) gene family in bread wheat (Triticum aestivum L.)
Source: PubMed Central journal article supplement (PMC5670714; doi:10.1186/s12870-017-1142-z), 2017-11-03
Supplement: 12870_2017_1142_MOESM2_ESM.pdf [file 12870_2017_1142_MOESM2_ESM.pdf]

Fig. S\_2: List of *Csl* subfamily genes, their protein sizes (number of amino acids), and multiple protein sequence alignments. The conserved motifs (D, D, DXD, QXXRW) diagnostic of CSL proteins are highlighted with red boxes for each of the subfamilies.

Figure S\_2A: *CslA* subfamily

| S.No | Gene name with number of splice variants (CslA)   | No. of amino acids (aa) |
|------|---------------------------------------------------|-------------------------|
| 1    | TRIAE_CS42_2BS_TGACv1_146583_AA0468630.1          | 581 aa                  |
| 2    | TRIAE_CS42_2AS_TGACv1_113418_AA0355820.2          | 580 aa                  |
| 3    | TRIAE_CS42_2DS_TGACv1_177473_AA0578070.1          | 581 aa                  |
| 4    | TRIAE_CS42_2AS_TGACv1_113300_AA0354190.1          | 579 aa                  |
| 5    | TRIAE_CS42_2DS_TGACv1_177798_AA0584795.1          | 881 aa                  |
| 6    | TRIAE_CS42_6BS_TGACv1_513375_AA1639370.1_2_SPLICE | 518 aa                  |
| 7    | TRIAE_CS42_6AS_TGACv1_485966_AA1554960.1          | 518 aa                  |
| 8    | TRIAE_CS42_U_TGACv1_642146_AA2112270.1            | 522 aa                  |
| 9    | TRIAE_CS42_7BL_TGACv1_579090_AA1903960.1          | 375 aa                  |
| 10   | TRIAE_CS42_7AL_TGACv1_558725_AA1795700.1          | 518 aa                  |
| 11   | TRIAE_CS42_6DS_TGACv1_543811_AA1744360.1          | 531 aa                  |
| 12   | TRIAE_CS42_6AS_TGACv1_487286_AA1569690.1          | 528 aa                  |
| 13   | TRIAE_CS42_6BS_TGACv1_513376_AA1639390.2_2_SPLICE | 528 aa                  |
| 14   | TRIAE_CS42_U_TGACv1_642146_AA2112290.1            | 512 aa                  |
| 15   | TRIAE_CS42_7BS_TGACv1_592860_AA1945380.1          | 547 aa                  |
| 16   | TRIAE_CS42_7DS_TGACv1_623146_AA2050070.1          | 545 aa                  |
| 17   | TRIAE_CS42_7AS_TGACv1_569190_AA1809650.1_3_SPLICE | 551 aa                  |
| 18   | TRIAE_CS42_7DL_TGACv1_602617_AA1962870.1_2_SPLICE | 555 aa                  |
| 19   | TRIAE_CS42_7AL_TGACv1_557254_AA1778850.1          | 515 aa                  |
| 20   | TRIAE_CS42_7BL_TGACv1_578444_AA1895100.1          | 515 aa                  |
| 21   | TRIAE_CS42_3DL_TGACv1_249033_AA0835410.1_2_SPLICE | 572 aa                  |
| 22   | TRIAE_CS42_3B_TGACv1_221079_AA0729630.1_2_SPLICE  | 571 aa                  |
| 23   | TRIAE_CS42_3AL_TGACv1_197519_AA0666560.1          | 573 aa                  |
| 24   | TRIAE_CS42_3B_TGACv1_220828_AA0720500.1           | 570 aa                  |
| 25   | TRIAE_CS42_3DS_TGACv1_273022_AA0927600.1          | 568 aa                  |
| 26   | TRIAE_CS42_2AL_TGACv1_093375_AA0278800.1          | 527 aa                  |
| 27   | TRIAE_CS42_2BL_TGACv1_129747_AA0394630.1          | 528 aa                  |
| 28   | TRIAE_CS42_2DL_TGACv1_160461_AA0550770.1          | 548 aa                  |
| 29   | TRIAE_CS42_1AS_TGACv1_019142_AA0061550.1          | 515 aa                  |
| 30   | TRIAE_CS42_3AS_TGACv1_210508_AA0674280.1          | 566 aa                  |
| 31   | TRIAE_CS42_3DS_TGACv1_272005_AA0912960.1          | 570 aa                  |
| 32   | TRIAE_CS42_3B_TGACv1_223332_AA0780350.1           | 925 aa                  |

```

TRIAE_CS42_3AS_TGACv -----AFTVSWEYILLELQRMNFPAAHWRDRIALLSSVSSAYLLKGDGPGAILHQRLRQGDPLSAILFILVIV 80
TRIAE_CS42_3B_TGACv1 MLLKKIDIAKAFDVTVSWEYILLELQRMNFPAAHWRDRIALLSSVSSAYLLKGDGPGAILHQRLRQGDPLSAILFILVIV 80
TRIAE_CS42_3B_TGACv1 -----AFTVSWEYILLELQRMNFPAAHWRDRIALLSSVSSAYLLKGDGPGAILHQRLRQGDPLSAILFILVIV 80
TRIAE_CS42_3DS_TGACv -----AFTVSWEYILLELQRMNFPAAHWRDRIALLSSVSSAYLLKGDGPGAILHQRLRQGDPLSAILFILVIV 80
TRIAE_CS42_3DS_TGACv -----AFTVSWEYILLELQRMNFPAAHWRDRIALLSSVSSAYLLKGDGPGAILHQRLRQGDPLSAILFILVIV 80
TRIAE_CS42_3DL_TGACv -----AFTVSWEYILLELQRMNFPAAHWRDRIALLSSVSSAYLLKGDGPGAILHQRLRQGDPLSAILFILVIV 80
TRIAE_CS42_3B_TGACv1 -----AFTVSWEYILLELQRMNFPAAHWRDRIALLSSVSSAYLLKGDGPGAILHQRLRQGDPLSAILFILVIV 80
TRIAE_CS42_3AL_TGACv -----AFTVSWEYILLELQRMNFPAAHWRDRIALLSSVSSAYLLKGDGPGAILHQRLRQGDPLSAILFILVIV 80
TRIAE_CS42_6BS_TGACv -----AFTVSWEYILLELQRMNFPAAHWRDRIALLSSVSSAYLLKGDGPGAILHQRLRQGDPLSAILFILVIV 80
TRIAE_CS42_6AS_TGACv -----AFTVSWEYILLELQRMNFPAAHWRDRIALLSSVSSAYLLKGDGPGAILHQRLRQGDPLSAILFILVIV 80
TRIAE_CS42_7AL_TGACv -----AFTVSWEYILLELQRMNFPAAHWRDRIALLSSVSSAYLLKGDGPGAILHQRLRQGDPLSAILFILVIV 80
TRIAE_CS42_U_TGACv1 -----AFTVSWEYILLELQRMNFPAAHWRDRIALLSSVSSAYLLKGDGPGAILHQRLRQGDPLSAILFILVIV 80
TRIAE_CS42_U_TGACv1 -----AFTVSWEYILLELQRMNFPAAHWRDRIALLSSVSSAYLLKGDGPGAILHQRLRQGDPLSAILFILVIV 80
TRIAE_CS42_7BL_TGACv -----AFTVSWEYILLELQRMNFPAAHWRDRIALLSSVSSAYLLKGDGPGAILHQRLRQGDPLSAILFILVIV 80
TRIAE_CS42_7AL_TGACv -----AFTVSWEYILLELQRMNFPAAHWRDRIALLSSVSSAYLLKGDGPGAILHQRLRQGDPLSAILFILVIV 80
TRIAE_CS42_7BL_TGACv -----AFTVSWEYILLELQRMNFPAAHWRDRIALLSSVSSAYLLKGDGPGAILHQRLRQGDPLSAILFILVIV 80
TRIAE_CS42_7DL_TGACv -----AFTVSWEYILLELQRMNFPAAHWRDRIALLSSVSSAYLLKGDGPGAILHQRLRQGDPLSAILFILVIV 80
TRIAE_CS42_2AL_TGACv -----AFTVSWEYILLELQRMNFPAAHWRDRIALLSSVSSAYLLKGDGPGAILHQRLRQGDPLSAILFILVIV 80
TRIAE_CS42_2DL_TGACv -----AFTVSWEYILLELQRMNFPAAHWRDRIALLSSVSSAYLLKGDGPGAILHQRLRQGDPLSAILFILVIV 80
TRIAE_CS42_2BL_TGACv -----AFTVSWEYILLELQRMNFPAAHWRDRIALLSSVSSAYLLKGDGPGAILHQRLRQGDPLSAILFILVIV 80
TRIAE_CS42_1AS_TGACv -----AFTVSWEYILLELQRMNFPAAHWRDRIALLSSVSSAYLLKGDGPGAILHQRLRQGDPLSAILFILVIV 80
TRIAE_CS42_7DS_TGACv -----AFTVSWEYILLELQRMNFPAAHWRDRIALLSSVSSAYLLKGDGPGAILHQRLRQGDPLSAILFILVIV 80
TRIAE_CS42_7AS_TGACv -----AFTVSWEYILLELQRMNFPAAHWRDRIALLSSVSSAYLLKGDGPGAILHQRLRQGDPLSAILFILVIV 80
TRIAE_CS42_7BS_TGACv -----AFTVSWEYILLELQRMNFPAAHWRDRIALLSSVSSAYLLKGDGPGAILHQRLRQGDPLSAILFILVIV 80
TRIAE_CS42_6DS_TGACv -----AFTVSWEYILLELQRMNFPAAHWRDRIALLSSVSSAYLLKGDGPGAILHQRLRQGDPLSAILFILVIV 80
TRIAE_CS42_6BS_TGACv -----AFTVSWEYILLELQRMNFPAAHWRDRIALLSSVSSAYLLKGDGPGAILHQRLRQGDPLSAILFILVIV 80
TRIAE_CS42_6AS_TGACv -----AFTVSWEYILLELQRMNFPAAHWRDRIALLSSVSSAYLLKGDGPGAILHQRLRQGDPLSAILFILVIV 80
TRIAE_CS42_2BS_TGACv -----AFTVSWEYILLELQRMNFPAAHWRDRIALLSSVSSAYLLKGDGPGAILHQRLRQGDPLSAILFILVIV 80
TRIAE_CS42_2DS_TGACv -----AFTVSWEYILLELQRMNFPAAHWRDRIALLSSVSSAYLLKGDGPGAILHQRLRQGDPLSAILFILVIV 80
TRIAE_CS42_2AS_TGACv -----AFTVSWEYILLELQRMNFPAAHWRDRIALLSSVSSAYLLKGDGPGAILHQRLRQGDPLSAILFILVIV 80

```

|                      |                                                                                    |     |
|----------------------|------------------------------------------------------------------------------------|-----|
| TRIAE_CS42_2AS_TGACv | -----                                                                              | 0   |
| TRIAE_CS42_2DS_TGACv | -----                                                                              | 0   |
| TRIAE_CS42_3AS_TGACv | -----                                                                              | 0   |
| TRIAE_CS42_3B_TGACv1 | PLHRMLEAAQQAGTIAPLPAGAARLVTLYADDAIFFANVPRQEIDTIMQLLQGFGEAAGLRGNPQKSSAATLNYGSIDL    | 160 |
| TRIAE_CS42_3B_TGACv1 | -----                                                                              | 0   |
| TRIAE_CS42_3DS_TGACv | -----                                                                              | 0   |
| TRIAE_CS42_3DS_TGACv | -----                                                                              | 0   |
| TRIAE_CS42_3DL_TGACv | -----                                                                              | 0   |
| TRIAE_CS42_3B_TGACv1 | -----                                                                              | 0   |
| TRIAE_CS42_3AL_TGACv | -----                                                                              | 0   |
| TRIAE_CS42_6BS_TGACv | -----                                                                              | 0   |
| TRIAE_CS42_6AS_TGACv | -----                                                                              | 0   |
| TRIAE_CS42_7AL_TGACv | -----                                                                              | 0   |
| TRIAE_CS42_U_TGACv1  | -----                                                                              | 0   |
| TRIAE_CS42_U_TGACv1  | -----                                                                              | 0   |
| TRIAE_CS42_7BL_TGACv | -----                                                                              | 0   |
| TRIAE_CS42_7AL_TGACv | -----                                                                              | 0   |
| TRIAE_CS42_7BL_TGACv | -----                                                                              | 0   |
| TRIAE_CS42_7DL_TGACv | -----                                                                              | 0   |
| TRIAE_CS42_2AL_TGACv | -----                                                                              | 0   |
| TRIAE_CS42_2DL_TGACv | -----                                                                              | 0   |
| TRIAE_CS42_2BL_TGACv | -----                                                                              | 0   |
| TRIAE_CS42_1AS_TGACv | -----                                                                              | 0   |
| TRIAE_CS42_7DS_TGACv | -----                                                                              | 0   |
| TRIAE_CS42_7AS_TGACv | -----                                                                              | 0   |
| TRIAE_CS42_7BS_TGACv | -----                                                                              | 0   |
| TRIAE_CS42_6DS_TGACv | -----                                                                              | 0   |
| TRIAE_CS42_6BS_TGACv | -----                                                                              | 0   |
| TRIAE_CS42_6AS_TGACv | -----                                                                              | 0   |
| TRIAE_CS42_2BS_TGACv | -----                                                                              | 0   |
| TRIAE_CS42_2DS_TGACv | -----                                                                              | 0   |
| TRIAE_CS42_2AS_TGACv | -----                                                                              | 0   |
| TRIAE_CS42_2AS_TGACv | -----                                                                              | 0   |
| TRIAE_CS42_2DS_TGACv | -----                                                                              | 0   |
| TRIAE_CS42_3AS_TGACv | -----                                                                              | 0   |
| TRIAE_CS42_3B_TGACv1 | IDVLKNFSGTRVGFPIRYLGLPLCIGRLPLCTRVGFPPIRYLGLWLLGKANSKIAPPLAVASHVLVRCVLSALPAFAMAVLR | 240 |
| TRIAE_CS42_3B_TGACv1 | -----                                                                              | 0   |
| TRIAE_CS42_3DS_TGACv | -----                                                                              | 0   |
| TRIAE_CS42_3DS_TGACv | -----                                                                              | 0   |
| TRIAE_CS42_3DL_TGACv | -----                                                                              | 0   |
| TRIAE_CS42_3B_TGACv1 | -----                                                                              | 0   |
| TRIAE_CS42_3AL_TGACv | -----                                                                              | 0   |
| TRIAE_CS42_6BS_TGACv | -----                                                                              | 0   |
| TRIAE_CS42_6AS_TGACv | -----                                                                              | 0   |
| TRIAE_CS42_7AL_TGACv | -----                                                                              | 0   |
| TRIAE_CS42_U_TGACv1  | -----                                                                              | 0   |
| TRIAE_CS42_U_TGACv1  | -----                                                                              | 0   |
| TRIAE_CS42_7BL_TGACv | -----                                                                              | 0   |
| TRIAE_CS42_7AL_TGACv | -----                                                                              | 0   |
| TRIAE_CS42_7BL_TGACv | -----                                                                              | 0   |
| TRIAE_CS42_7DL_TGACv | -----                                                                              | 0   |
| TRIAE_CS42_2AL_TGACv | -----                                                                              | 0   |
| TRIAE_CS42_2DL_TGACv | -----                                                                              | 0   |
| TRIAE_CS42_2BL_TGACv | -----                                                                              | 0   |
| TRIAE_CS42_1AS_TGACv | -----                                                                              | 0   |
| TRIAE_CS42_7DS_TGACv | -----                                                                              | 0   |
| TRIAE_CS42_7AS_TGACv | -----                                                                              | 0   |
| TRIAE_CS42_7BS_TGACv | -----                                                                              | 0   |
| TRIAE_CS42_6DS_TGACv | -----                                                                              | 0   |
| TRIAE_CS42_6BS_TGACv | -----                                                                              | 0   |
| TRIAE_CS42_6AS_TGACv | -----                                                                              | 0   |
| TRIAE_CS42_2BS_TGACv | -----                                                                              | 0   |
| TRIAE_CS42_2DS_TGACv | -----                                                                              | 0   |
| TRIAE_CS42_2AS_TGACv | -----                                                                              | 0   |
| TRIAE_CS42_2AS_TGACv | -----                                                                              | 0   |
| TRIAE_CS42_2DS_TGACv | -----MAAWNPEHSGSgaiVgaddcettveDEMAAGRdANTklFHRVANGRk                               | 48  |
| TRIAE_CS42_3AS_TGACv | -----                                                                              | 0   |
| TRIAE_CS42_3B_TGACv1 | IPKRFYKDVdKARWFLWVHDHEVTGGRCKVNWRLVTSFVDHGGLGIPSMERFARALCLRWLWLANWDPARPWARMGTFC    | 320 |
| TRIAE_CS42_3B_TGACv1 | -----                                                                              | 0   |
| TRIAE_CS42_3DS_TGACv | -----                                                                              | 0   |
| TRIAE_CS42_3DS_TGACv | -----                                                                              | 0   |
| TRIAE_CS42_3DL_TGACv | -----                                                                              | 0   |
| TRIAE_CS42_3B_TGACv1 | -----                                                                              | 0   |
| TRIAE_CS42_3AL_TGACv | -----                                                                              | 0   |
| TRIAE_CS42_6BS_TGACv | -----                                                                              | 0   |
| TRIAE_CS42_6AS_TGACv | -----                                                                              | 0   |
| TRIAE_CS42_7AL_TGACv | -----                                                                              | 0   |
| TRIAE_CS42_U_TGACv1  | -----                                                                              | 0   |
| TRIAE_CS42_U_TGACv1  | -----                                                                              | 0   |
| TRIAE_CS42_7BL_TGACv | -----                                                                              | 0   |
| TRIAE_CS42_7AL_TGACv | -----                                                                              | 0   |
| TRIAE_CS42_7BL_TGACv | -----                                                                              | 0   |
| TRIAE_CS42_7DL_TGACv | -----                                                                              | 0   |
| TRIAE_CS42_2AL_TGACv | -----                                                                              | 0   |
| TRIAE_CS42_2DL_TGACv | -----                                                                              | 0   |
| TRIAE_CS42_2BL_TGACv | -----                                                                              | 0   |
| TRIAE_CS42_1AS_TGACv | -----                                                                              | 0   |
| TRIAE_CS42_7DS_TGACv | -----                                                                              | 0   |
| TRIAE_CS42_7AS_TGACv | -----                                                                              | 0   |
| TRIAE_CS42_7BS_TGACv | -----                                                                              | 0   |
| TRIAE_CS42_6DS_TGACv | -----                                                                              | 0   |
| TRIAE_CS42_6BS_TGACv | -----                                                                              | 0   |

TRIAE\_CS42\_6AS\_TGACv ----- 0  
TRIAE\_CS42\_2BS\_TGACv -----MEA 3  
TRIAE\_CS42\_2DS\_TGACv -----MEA 3  
TRIAE\_CS42\_2AS\_TGACv -----MEA 3  
TRIAE\_CS42\_2AS\_TGACv -----MEA 3  
TRIAE\_CS42\_2DS\_TGACv LKNFIPAI SVEGTTITDQAAKEEAFFAYSELLGRCSREHTLDDYLGIESINLEDQDLVFEQEEVVKVVRDMPDRAL 128  
  
TRIAE\_CS42\_3AS\_TGACv -----MAMAA 5  
TRIAE\_CS42\_3B\_TGACv1 DDKDRALFASATTVTVDGNRVLFWHCSWLGEQPVQRDYPNLFRRSTRKNRMADAIRDWRIMDLRRSGAGEVMAMAA 400  
TRIAE\_CS42\_3B\_TGACv1 -----MAMAA 5  
TRIAE\_CS42\_3DS\_TGACv -----MAA 3  
TRIAE\_CS42\_3DS\_TGACv -----MAATA 5  
TRIAE\_CS42\_3DL\_TGACv -----MAGAGEEFMA- 10  
TRIAE\_CS42\_3B\_TGACv1 -----MAGAGEEFMA- 10  
TRIAE\_CS42\_3AL\_TGACv -----MAGAGEEFMAS 11  
TRIAE\_CS42\_6BS\_TGACv ----- 0  
TRIAE\_CS42\_6AS\_TGACv ----- 0  
TRIAE\_CS42\_7AL\_TGACv ----- 0  
TRIAE\_CS42\_U\_TGACv1 ----- 0  
TRIAE\_CS42\_U\_TGACv1 ----- 0  
TRIAE\_CS42\_7BL\_TGACv ----- 0  
TRIAE\_CS42\_7AL\_TGACv ----- 0  
TRIAE\_CS42\_7BL\_TGACv ----- 0  
TRIAE\_CS42\_7DL\_TGACv ----- 0  
TRIAE\_CS42\_2AL\_TGACv ----- 0  
TRIAE\_CS42\_2DL\_TGACv -----MEKKKRRSSIS 11  
TRIAE\_CS42\_2BL\_TGACv ----- 0  
TRIAE\_CS42\_1AS\_TGACv ----- 0  
TRIAE\_CS42\_7DS\_TGACv -----MAGDGEGAAAFAAKAEW 18  
TRIAE\_CS42\_7AS\_TGACv -----MAGDGEAGDGEGAAAFAAKAEW 24  
TRIAE\_CS42\_7BS\_TGACv -----MAGDGEGAAAFVAKAEW 18  
TRIAE\_CS42\_6DS\_TGACv ----- 0  
TRIAE\_CS42\_6BS\_TGACv ----- 0  
TRIAE\_CS42\_6AS\_TGACv ----- 0  
TRIAE\_CS42\_2BS\_TGACv AEIGGALLFALAAAAALFSAVSTGAVDFSHPLAVGGRVDFQETISWFIG----- 52  
TRIAE\_CS42\_2DS\_TGACv AEIGGALLFALAAAAALFAAVSTGAVDFSHPPAVGGRVDFQEAISWFIG----- 52  
TRIAE\_CS42\_2AS\_TGACv AEIGGALLFALAAAAALFAAVSTGALDFSRPLAVGGRVDFQEAISWFIG----- 52  
TRIAE\_CS42\_2AS\_TGACv GEIGGALLFLVAAAAALFAAVSTGAVDFSHPPAVGGQLDFQETISWFTG----- 52  
TRIAE\_CS42\_2DS\_TGACv GPNGFIGVFPQKAWAIVKRDVMAALNKLFLNNGRGEFRLNQALITLIPKNHEACQIKDFRPICLVHSIPKLASKLLATRL 208  
  
TRIAE\_CS42\_3AS\_TGACv TAWLWVEVPVRVDWPAVAQAQWAGEQAARAFVVPVAVRLLVLSLAMTVMILLEKIFVAAV-CYAAKAFGHRPESRYQWR 84  
TRIAE\_CS42\_3B\_TGACv1 TAGLWAEVPVRDLWATVAAQCALAGEQAARAFVVPVAVRLLVLSLAMTVMILLEKIFVAAV-CYAAKAFGHRPERRYKWG 479  
TRIAE\_CS42\_3B\_TGACv1 TAGLWAEVPVRDLWATVAAQCALAGEQAARAFVVPVAVRLLVLSLAMTVMILLEKIFVAAV-CYAAKAFRHRPESRYRWR 84  
TRIAE\_CS42\_3DS\_TGACv TVGLREEVPVRDLWATVAAQCAWAGEQAARAFVVPVAVRLLVLSLAMTVMILLEKIFVAAV-CYAAKAFGHRPESRYKWG 82  
TRIAE\_CS42\_3DS\_TGACv WLWAEVPVRVDWAAVAQAQWAGEQAARAFVVPVAVRLLVLSLAMTVMILLEKIFVAAV-CYAAKAFGHRPESRYRWR 84  
TRIAE\_CS42\_3DL\_TGACv --GVWAEVPVRVDWAAVAQAQWAGEQAARAFVVPVAVRLLVLSLAMTVMILLEKIFVAAV-CFAAKAFGHRPERRYQWR 87  
TRIAE\_CS42\_3B\_TGACv1 --AVWAGLVPVRVDWAAVAQAQWAGEQAARAFVVPVAVRLLVLSLAMTVMILLEKIFVAAV-CFAAKAFGHRPERRYQWR 87  
TRIAE\_CS42\_3AL\_TGACv AAGVWAEVLPVRVDWAAVAQAQWAGEQAARAFVVPVAVRLLVLSLIMTVMILLEKIFVAAV-CFAAKAFGHRPERRYQWR 90  
TRIAE\_CS42\_6BS\_TGACv -----MDAAVGLPDAWSQVRAAFIVPPLLKLAVALCLMSVLLFLRMYMAV-IVGVKLLGRRPERRYKCD 65  
TRIAE\_CS42\_6AS\_TGACv -----MDAAVGLPDAWSQVRAAFIVPPLLKLAVALCLMSVLLFLRMYMAV-IVGVKLLGRRPERRYKCD 65  
TRIAE\_CS42\_7AL\_TGACv -----MSTLPGVWQIAAAAEQVGRFIVPPLLRSVLSCLAMSEMLFAEKIYMAV-VLAVRLLGRRPERRYKWE 68  
TRIAE\_CS42\_U\_TGACv1 -----MSTLPGAWHVAAAEQVGRFIVPPLLRSVLSCLAMSEMLFAEKIYMAV-VLAVRLLGRRPERRYQWE 68  
TRIAE\_CS42\_U\_TGACv1 -----MAAALLPGTRITFSGAWQVGRFIVPPLLRSVLSCLAMSEMLFAEKIYMAV-VLAVRLLGRRPERRYQWE 71  
TRIAE\_CS42\_7BL\_TGACv -----MSTLFRVWQIAAAAEQVGRFIVPPLLRSVLSCLAMSEMLFAEKIYMAV-VLAVRLLGRRPERRYQWE 68  
TRIAE\_CS42\_7AL\_TGACv -----MEAAEQIAVWVKQVGRFIVPPLLRSVLSCLAMCVILFVEKIYMAV-IVAMRLIGRPERQWRWE 65  
TRIAE\_CS42\_7BL\_TGACv -----MEAAEQIAVWVKQVGRFIVPPLLRSVLSCLAMCVILFVEKIYMAV-IVAMRLIGRPERQWRWE 65  
TRIAE\_CS42\_7DL\_TGACv -----MEAAEQIAVWVKQVGRFIVPPLLRSVLSCLAMCVILFVEKIYMAV-IVAMRLIGRPERQWRWE 65  
TRIAE\_CS42\_2AL\_TGACv -----MKGVSMLTARAANAARAVRIVPPLLQAVYCAAMSMLFAERMYMGL-VAAWLRRRRRRQRNPRGR 68  
TRIAE\_CS42\_2DL\_TGACv FLLSFGGRRMRKGVSMILTARAANAARAVRIVPPLLQAVYCAAMSMLFAERMYMGL-VAAWLRRRRRRQRNPRGR 90  
TRIAE\_CS42\_2BL\_TGACv -----MRGVSMLTARAANAARAVRIVPPLLQAVYCAAMSMLFAERMYMGL-VAAWLRRRRRRQRNPRGR 68  
TRIAE\_CS42\_1AS\_TGACv -----MSLPMARAALVLRVAVVPLLQALAIYCVVMSMLFAERMYMGL-VAVLWLRRCRNRNQRNK 65  
TRIAE\_CS42\_7DS\_TGACv LDGSGGLPRLRWNRASGGGELLGRWDVAVRAGVAPALAAVSGCLAMSEMLLAEAFMAA-SLVR---RRPERRYAG 93  
TRIAE\_CS42\_7AS\_TGACv LGGSGGLPRLRWNRASGGGELLGRWDVAVRAGVAPALAAVSGCLAMSEMLLAEAFMAA-SLVR---RRPERRYAG 99  
TRIAE\_CS42\_7BS\_TGACv LAGSGGLPRLRWNRASGGGELLGRWDVAVRAGVAPALAAVSGCLAMSEMLLAEAFMAA-SLVR---RRPERRYAG 93  
TRIAE\_CS42\_6DS\_TGACv -----MAPLGADAAAAAARAVRIVAPALTAAVWCLAMSEMLLAEAFMAA-SLVAVRLRLRPERRFKWE 68  
TRIAE\_CS42\_6BS\_TGACv -----MAPLGADAAAAAARAVRIVAPALTAAVWCLAMSEMLLAEAFMAA-SLVAVRLRLRPERRFKWE 68  
TRIAE\_CS42\_6AS\_TGACv -----MAPLSAGAAAAAARAVRIVAPALTAAVWCLAMSEMLLAEAFMAA-SLVAVRLRLRPERRFKWE 68  
TRIAE\_CS42\_2BS\_TGACv -IPDGSSSSSAAGVSLAEVYELWVRVGRVITAPALQAVWCMVMSMLVVEALYNCV-SLGVKAVGWRPEWRFKWE 130  
TRIAE\_CS42\_2DS\_TGACv -VFDGSSSSSAAGVSLAEVYELWVRVGRVITAPALQAVWCMVMSMLVVEALYNCV-SLGVKAVGWRPEWRFKWE 130  
TRIAE\_CS42\_2AS\_TGACv -IPDGSSSSSAAGVSLAEVYELWVRVGRVITAPALQAVWCMVMSMLVVEALYNCV-SLGVKAVGWRPEWRFKWE 129  
TRIAE\_CS42\_2AS\_TGACv -VYNG-ASYSSGAGVSLAEVHELWVRVGRVITAPALQAVWCMVMSMLVVEALYNCV-SLGVKAVGWRPEWRFKWE 129  
TRIAE\_CS42\_2DS\_TGACv CPRMGELVHAKQSAFIGRNIHDFLQVQLRKLKRYKRTKSMMLKLESRAFSSSWPFF- FEVLRVKGFSTRWRFWIA 287  
  
TRIAE\_CS42\_3AS\_TGACv PIAASACKTGGDDEEDGIVVVG---SAAPFVLLVQIPMYNEREVYKVSIGAACALEWPSDRMVIQVLDDSTDPVVKDLV 160  
TRIAE\_CS42\_3B\_TGACv1 PVAASACKTGGDDEEDGIVVVGSGSGSAAFPVLLVQIHMNER-----EDLV 526  
TRIAE\_CS42\_3B\_TGACv1 PITASACKTGGDDEEDGIVVVGSGSGRAAFPVLLVQIPMYNEREVYKVSIGAACALEWPSDRMVIQVLDDSTDPVVKELV 164  
TRIAE\_CS42\_3DS\_TGACv PIAASACKTGGDDEEDGIVVVGSGSGSAAFPVLLVQIPMYNEREVYKVSIGAACALEWPSDRMVIQVLDDSTDPVVKELV 162  
TRIAE\_CS42\_3DL\_TGACv PIAASACKAGGDEEDGIVVVGSGSGSAAFPVLLVQIPMYNEREVYKVSIGAACALEWPSDRMVIQVLDDSTDPVVKDLV 164  
TRIAE\_CS42\_3DL\_TGACv PIAAGAAAAARGDEE--AGLVGGGGSAAFPVLLVQIPMYNEREVYKVSIGAACALEWPSDRMVIQVLDDSTDPVVKDLV 165  
TRIAE\_CS42\_3B\_TGACv1 PIAAGAAAAARGDEE--AGVGGG---SAAPFVLLVQIPMYNEREVYKVSIGAACALEWPAERVVIQVLDDSTDPVVKDLV 163  
TRIAE\_CS42\_3AL\_TGACv PIAASACKTGGVDEE--ASVGGG---SAFPVLLVQIPMYNEREVYKVSIGAACALEWPSDRMVIQVLDDSTDPVVKDLV 165  
TRIAE\_CS42\_6BS\_TGACv PICEDDDE-----LGSAAFPVLLVQIPMYNEREVYKVSIGAVCGLSWPSDRMVIQVLDDSTDPVVKELV 130  
TRIAE\_CS42\_6AS\_TGACv PICEDDDE-----LGSAAFPVLLVQIPMYNEREVYKVSIGAVCGLSWPSDRMVIQVLDDSTDPVVKELV 130  
TRIAE\_CS42\_7AL\_TGACv PVGE--DDE-----LGSAAFPVLLVQIPMYNEREVYKVSIGAVCGLSWPSDRMVIQVLDDSTDPVVKELV 132  
TRIAE\_CS42\_U\_TGACv1 PMGD--DDE-----LGSAAFPVLLVQIPMYNEREVYKVSIGAVCGLSWPSDRMVIQVLDDSTDPVVKELV 132  
TRIAE\_CS42\_U\_TGACv1 PMRDGDDE-----LGSAAFPVLLVQIPMYNEREVYKVSIGAVCGLSWPSDRMVIQVLDDSTDPVVKELV 136  
TRIAE\_CS42\_7BL\_TGACv PVGDNDDE-----LGSAAFPVLLVQIPMYNEREVYKVSIGAVCGLSWPSDRMVIQVLDDSTDPVVKELV 133  
TRIAE\_CS42\_7AL\_TGACv PLRD--DDE-----LGNAAFPVLLVQIPMYNEREVYKVSIGAVCGLSWPSDRMVIQVLDDSTDPVVKELV 129  
TRIAE\_CS42\_7BL\_TGACv PLRD--DDE-----LGNAAFPVLLVQIPMYNEREVYKVSIGAVCGLSWPSDRMVIQVLDDSTDPVVKELV 129  
TRIAE\_CS42\_7DL\_TGACv PLRD--DDE-----LGNAAFPVLLVQIPMYNEREVYKVSIGAVCGLSWPSDRMVIQVLDDSTDPVVKELV 129  
TRIAE\_CS42\_2AL\_TGACv NKGDDDDV-----DLESAAEDLPLVLLVQIPMFNEKQVYRISIGAVCGLWPPADKLVIVLDDSTDPVVKELV 137  
TRIAE\_CS42\_2DL\_TGACv NKGDDDDV-----LESAAEDLPLVLLVQIPMFNEKQVYRISIGAVCGLWPPADKLVIVLDDSTDPVVKELV 157  
TRIAE\_CS42\_2BL\_TGACv NKGDDDDGAG-----DLESGGEDLPLVLLVQIPMFNEKQVYRISIGAVCGLWPPADKLVIVLDDSTDPVVKELV 138  
TRIAE\_CS42\_1AS\_TGACv GDDNLESD-----DADRPMLVLLVQIPMFNEKQVYRISIGAVCGLWPPADKLVIVLDDSTDPVVKELV 128  
TRIAE\_CS42\_7DS\_TGACv PLGAQDGEDE-----ERGLLYGPMVLLVQIPMYNEREVYKVSIGAVCGLSWPSDRMVIQVLDDSTDPVVKELV 160

TRIAE\_CS42\_7AS\_TGACV PLGAQDGEDE-----ERLLGYPMILVQIPMYNEREVYKLSIGAACGLSWPSDRVIVQVLLDDSTDPDKLVL 166  
TRIAE\_CS42\_7BS\_TGACV PLGAQDGEDED-----EERLLGYPMILVQIPMYNEREVYKLSIGAACGLSWPSDRVIVQVLLDDSTDPDKLVL 162  
TRIAE\_CS42\_6DS\_TGACV PMGALPGEAEADVED----PPASAGRRFFPMILVQIPMYNEKEVYKLSIGAVCALTWPPDRI IIVQLVDDSTDPDKLVL 143  
TRIAE\_CS42\_6BS\_TGACV PMGALPGEAEADAE----PPG---RREFPMILVQIPMYNEKEVYKLSIGAVCALTWPPDRI IIVQLVDDSTDPDKLVL 140  
TRIAE\_CS42\_6AS\_TGACV PMTGALEGGAEADVED----PAG---RREFPMILVQIPMYNEKEVYKLSIGAVCALTWPPDRI IIVQLVDDSTDPDKLVL 140  
TRIAE\_CS42\_2BS\_TGACV FLAGDDEEKEGG-----AHYPMILVQIPMYNELEVYKLSIGAACELQWPKDRI IIVQLVDDSTDPDKLVL 194  
TRIAE\_CS42\_2DS\_TGACV FLAGDDEEKEGG-----AHYPMILVQIPMYNELEVYKLSIGAACELQWPKDRI IIVQLVDDSTDPDKLVL 194  
TRIAE\_CS42\_2AS\_TGACV FLAGDDEEKEGG-----AHYPMILVQIPMYNELEVYKLSIGAACELQWPKDRI IIVQLVDDSTDPDKLVL 193  
TRIAE\_CS42\_2AS\_TGACV FLAGD-EEKGS-----AHYPMILVQIPMYNELEVYKLSIGAACELQWPKDRI IIVQLVDDSTDPDKLVL 192  
TRIAE\_CS42\_2DS\_TGACV TLLTTASSRVV-----VNGCVLKKFMHACGLRQGDSISPLLFVIAMVLSAMILKARETNAVSKIPGCA 351

TRIAE\_CS42\_3AS\_TGACV KICQRWKSkgvNIRyEVRQNRKGVKAGALRLEGLMRD-----YTRR 201  
TRIAE\_CS42\_3B\_TGACV1 KICQRWKSkgvNIRyEVRQNRKGVKAGALRLEGLIRD-----YTRR 567  
TRIAE\_CS42\_3B\_TGACV1 KICQRWKGkgvNIRyEVRGNRRKGVKAGALRQGLMRD-----YTRR 205  
TRIAE\_CS42\_3DS\_TGACV KICQRWKGkgvNIRyEVRGNRRKGVKAGALRQGLMRD-----YTRR 203  
TRIAE\_CS42\_3DS\_TGACV KICQRWKSkgvNIRyEVRGNRRKGVKAGALRQGLMRD-----YTRR 205  
TRIAE\_CS42\_3DL\_TGACV EICQRWKGkgvNIRyEVRGNRRKGVKAGALRLEGLKHD-----YTRR 206  
TRIAE\_CS42\_3B\_TGACV1 EICQRWKGkgvNIRyEVRGNRRKGVKAGALRLEGLKHD-----YTRR 204  
TRIAE\_CS42\_3AL\_TGACV EICQRWKGkgvNIRyEVRGNRRKGVKAGALRLEGLKHD-----YTRR 206  
TRIAE\_CS42\_6BS\_TGACV RMCERWAHKGGINITYQIREDRKGVKAGALRAGMKHG-----YTRR 171  
TRIAE\_CS42\_6AS\_TGACV RMCERWAHKGGINITYQIREDRKGVKAGALRAGMKHG-----YTRR 171  
TRIAE\_CS42\_7AL\_TGACV QVCRRWARKGvNIKYEIRDNRKGVKAGALRAGMKHG-----YTRR 173  
TRIAE\_CS42\_U\_TGACV1 RVCRRWARKGvNIKYEIRDNRKGVKAGALRAGMKHG-----YTRR 173  
TRIAE\_CS42\_U\_TGACV1 QVCRRWARKGvNIKYEIRDNRKGVKAGALRAGMKHG-----YTRR 177  
TRIAE\_CS42\_7BL\_TGACV QVCRRWARKGvNIKYEIRDNRKGVKAGALRAGMKHG-----YTRR 174  
TRIAE\_CS42\_7AL\_TGACV QVCHRWANKGvNIKYEIRDNRKGVKAGALRAGMKHG-----YTRR 170  
TRIAE\_CS42\_7BL\_TGACV QVCRRWANKGvNIKYEIRDNRKGVKAGALRAGMKHG-----YTRR 170  
TRIAE\_CS42\_7DL\_TGACV QVCRRWANKGvNIKYEIRDNRKGVKAGALRAGMKHG-----YTRR 170  
TRIAE\_CS42\_2AL\_TGACV EACRRWAGKGVHIRYENRNSNRSGVKAGALRLEGLKKG-----YTRR 178  
TRIAE\_CS42\_2DL\_TGACV EACRRWAGKGVQIRYENRNSNRSGVKAGALRLEGLKKG-----YTRR 198  
TRIAE\_CS42\_2BL\_TGACV EACRRWAGKGVQIRYENRNSNRSGVKAGALRLEGLKKG-----YTRR 179  
TRIAE\_CS42\_1AS\_TGACV EACRRWAGKGVHIRYENRNSNRSGVKAGALRDLGLKKG-----YTRR 169  
TRIAE\_CS42\_7DS\_TGACV ELCKIWAkkGKNVkyEVRNNREGVKAGALRLEGLMHA-----YTRR 201  
TRIAE\_CS42\_7AS\_TGACV ELCKIWAkkGKNVkyEVRNNREGVKAGALRLEGLMHA-----YTRR 207  
TRIAE\_CS42\_7BS\_TGACV ELCKIWAkkGKNVkyEVRNNREGVKAGALRLEGLMHA-----YTRR 203  
TRIAE\_CS42\_6DS\_TGACV ELCCQEWASKKIDIKYEVRNNRKGVKAGALRKGMEHV-----YTRR 184  
TRIAE\_CS42\_6BS\_TGACV ELCCQEWASKKIDIKYEVRNNRKGVKAGALRKGMEHV-----YTRR 181  
TRIAE\_CS42\_6AS\_TGACV ELCCQEWASKKIDIKYEVRNNRKGVKAGALRKGMEHV-----YTRR 181  
TRIAE\_CS42\_2BS\_TGACV ELCESWAVKGLNIKYATRSSRKGVKAGALRKGMECD-----YTRR 235  
TRIAE\_CS42\_2DS\_TGACV ELCESWAVKGLNIKYATRSSRKGVKAGALRKGMECD-----YTRR 235  
TRIAE\_CS42\_2AS\_TGACV ELCESWVKGGLNIKYATRSSRKGVKAGALRKGMEYD-----YTRR 234  
TRIAE\_CS42\_2AS\_TGACV ELCETVVTKGLNIKYAPRSQKGVKAGALRKGMECD-----YTRR 233  
TRIAE\_CS42\_2DS\_TGACV PIRLSLVDDVVMFKPSWTDLWVQELRIVFGASGLKVNFSKSSAVMIRSEEEVLRKAMPWKMETFPIKYL 431

TRIAE\_CS42\_3AS\_TGACV CEFIAMFDFDQPEPDFLRTVFLVHN----- 229  
TRIAE\_CS42\_3B\_TGACV1 CEFIAMFDFDQPEPDFLRTVFLVHN----- 595  
TRIAE\_CS42\_3B\_TGACV1 CEFIAMFDFDQPEPDFLRTVFLVHN----- 233  
TRIAE\_CS42\_3DS\_TGACV CEFIAMFDFDQPEPDFLRTVFLVHN----- 231  
TRIAE\_CS42\_3DS\_TGACV CEFIAMFDFDQPEPDFLRTVFLVHN----- 233  
TRIAE\_CS42\_3DL\_TGACV CEFIAMFDFDQPEPDFLRTVFLVHN----- 234  
TRIAE\_CS42\_3B\_TGACV1 CEFIAMFDFDQPEPDFLRTVFLVHN----- 232  
TRIAE\_CS42\_3AL\_TGACV CEFIAMFDFDQPEPDFLRTVFLVHN----- 234  
TRIAE\_CS42\_6BS\_TGACV CEYVVI FDFDQPPDFHRTIYFLHNN----- 199  
TRIAE\_CS42\_6AS\_TGACV CEYVVI FDFDQPPDFHRTIYFLHNN----- 199  
TRIAE\_CS42\_7AL\_TGACV CDLVAI FDFDQPEPDFHWAVFLVHN----- 201  
TRIAE\_CS42\_U\_TGACV1 CDLVAI FDFDQPEPDFHWAVFLVHN----- 195  
TRIAE\_CS42\_U\_TGACV1 CDLVAI FDFDQPEPDFSRSVFLVHN----- 205  
TRIAE\_CS42\_7BL\_TGACV CDLVAI FDFDQPEPDFSRSVFLVHN----- 202  
TRIAE\_CS42\_7AL\_TGACV CDYVVI FDFDQPEPDFSRAMFLVHN----- 198  
TRIAE\_CS42\_7BL\_TGACV CDFVVI FDFDQPEPDFSRAMFLIHN----- 198  
TRIAE\_CS42\_7DL\_TGACV CDFVVI FDFDQPEPDFSRAMFLIHN----- 198  
TRIAE\_CS42\_2AL\_TGACV CELVAV FDFDQPDADFRTTVVLQAD----- 206  
TRIAE\_CS42\_2DL\_TGACV CELVAV FDFDQPDADFRTTVVLQAD----- 226  
TRIAE\_CS42\_2BL\_TGACV CELVAV FDFDQPDADFRTTVVLQAD----- 207  
TRIAE\_CS42\_1AS\_TGACV CEFVAV FDFDQPDADFRTTVVLEAD----- 197  
TRIAE\_CS42\_7DS\_TGACV CDFLAV FDFDQPEPDFMRTIYFLARN----- 229  
TRIAE\_CS42\_7AS\_TGACV CDFLAV FDFDQPEPDFMRTIYFLARN----- 235  
TRIAE\_CS42\_7BS\_TGACV CDFLAV FDFDQPEPDFMRTIYFLSRN----- 231  
TRIAE\_CS42\_6DS\_TGACV CEFVAI FDFDQPEPDFLRTIYFLVHN----- 212  
TRIAE\_CS42\_6BS\_TGACV CEFVAI FDFDQPEPDFLRTIYFLVHN----- 209  
TRIAE\_CS42\_6AS\_TGACV CEFVAI FDFDQPEPDFLRTIYFLVHN----- 209  
TRIAE\_CS42\_2BS\_TGACV CEYVAI FDFDQPEPDFLRTVFFVHN----- 263  
TRIAE\_CS42\_2DS\_TGACV CEYVAI FDFDQPEPDFLRTVFFVHN----- 263  
TRIAE\_CS42\_2AS\_TGACV CEYVAI FDFDQPEPDFLRTVFFVHN----- 262  
TRIAE\_CS42\_2AS\_TGACV CEYVAI FDFDQPEPDFLRTIYFFVHN----- 261  
TRIAE\_CS42\_2DS\_TGACV LGKQLTRSEIQPVVDQLRMMGSGWRGVPVTRPGRPLPVNQVVRARPIHHLIVAEAPKRALDRVDPKGCRAFFWAGSEI 510

TRIAE\_CS42\_3AS\_TGACV -----PDLALVQTRWKFVNSDECILTRFQEMSL 257  
TRIAE\_CS42\_3B\_TGACV1 -----PDLALVQTRWKFVNSDECILTRFQEMSL 623  
TRIAE\_CS42\_3B\_TGACV1 -----PDLALVQTRWKFVNSDKCILTRFQEMSL 261  
TRIAE\_CS42\_3DS\_TGACV -----PDLALVQTRWKFVNSDKCILTRFQEMSL 259  
TRIAE\_CS42\_3DS\_TGACV -----PDLALVQTRWKFVNSDECILTRFQEMSL 261  
TRIAE\_CS42\_3DL\_TGACV -----PDLALVQTRWKFVNSDECILTRFQEMSL 262  
TRIAE\_CS42\_3B\_TGACV1 -----PDLALVQTRWKFVNSDECILTRFQEMSL 260  
TRIAE\_CS42\_3AL\_TGACV -----PDLALVQTRWKFVNSDECILTRFQEMSL 262  
TRIAE\_CS42\_6BS\_TGACV -----PELALVQARWKFVNADECIMTRMQEMSL 227  
TRIAE\_CS42\_6AS\_TGACV -----PELALVQARWKFVNADECIMTRMQEMSL 227  
TRIAE\_CS42\_7AL\_TGACV -----PDLALVQARWKFVNADECIMTRMQEMSL 229  
TRIAE\_CS42\_U\_TGACV1 -----PDLALVQARWKFVNADECIMTRMQEMSL 223  
TRIAE\_CS42\_U\_TGACV1 -----PDLALVQARWKFVNADECIMTRMQEMSL 233  
TRIAE\_CS42\_7BL\_TGACV -----PDLALVQARWKFVNADECIMTRMQEMSL 230  
TRIAE\_CS42\_7AL\_TGACV -----PELALVQARWKFVNADECIMTRMQEMSL 226  
TRIAE\_CS42\_7BL\_TGACV -----PELALVQARWKFVNADECIMTRMQEMSL 226  
TRIAE\_CS42\_7DL\_TGACV -----PELALVQARWKFVNADECIMTRMQEMSL 226  
TRIAE\_CS42\_2AL\_TGACV -----PALALVQARWKFVNADECILTRIQEMSL 234

TRIAE\_CS42\_2DL\_TGACv -----PSVALVQARWRFVNADECLLRIQESL 254  
TRIAE\_CS42\_2BL\_TGACv -----PAVALVQARWRFVNADECLLRIQESL 235  
TRIAE\_CS42\_1AS\_TGACv -----PAVALVQARWRFVNADECLLRIQESL 225  
TRIAE\_CS42\_7DS\_TGACv -----PQALVQARWRFVNPNECLLRIQESL 257  
TRIAE\_CS42\_7AS\_TGACv -----PQALVQARWRFVNPNECLLRIQESL 263  
TRIAE\_CS42\_7BS\_TGACv -----PQALVQARWRFVNPNECLLRIQESL 259  
TRIAE\_CS42\_6DS\_TGACv -----PKTALVQTRWKFVNYDACLRIQESL 240  
TRIAE\_CS42\_6BS\_TGACv -----PKTALVQTRWKFVNYDACLRIQESL 237  
TRIAE\_CS42\_6AS\_TGACv -----PKTALVQTRWKFVNYDACLRIQESL 237  
TRIAE\_CS42\_2BS\_TGACv -----PEVALVQARWRFVNDTASLLRVQKQFF 291  
TRIAE\_CS42\_2DS\_TGACv -----PEVALVQARWRFVNDTASLLRVQKQFF 291  
TRIAE\_CS42\_2AS\_TGACv -----PEVALVQARWRFVNDTASLLRVQKQFF 290  
TRIAE\_CS42\_2AS\_TGACv -----PKVALVQARWRFVNDTASLLRIQESL 289  
TRIAE\_CS42\_2DS\_TGACv GGQCAVAVNRGYYRPFQMGGLGVVDLHKHGIALRLSLQTSFSEQSRSSCTIQKLLFKLSGFSNNNTVSLRIQESL 591

TRIAE\_CS42\_3AS\_TGACv D/HFKFEOBAGSIVYSFFFNAGTAGVWRISALINDAGGKERTVI DMDLAVRTALLGLKFFYYGAMKKSLELPSTFKAMR 337  
TRIAE\_CS42\_3B\_TGACv1 D/HFKFEOBAGSIVYSFFFNAGTAGVWRISALINDAGGKERTVI DMDLAVRTALLGLKFFYYGAMKKSLELPSTFKAMR 703  
TRIAE\_CS42\_3B\_TGACv1 D/HFKFEOBAGSIVYSFFFNAGTAGVWRISALINDAGGKERTVI DMDLAVRTALLGLKFFYYGAMKKSLELPSTFKAMR 341  
TRIAE\_CS42\_3DS\_TGACv D/HFKFEOBAGSIVYSFFFNAGTAGVWRISALINDAGGKERTVI DMDLAVRTALLGLKFFYYGAMKKSLELPSTFKAMR 339  
TRIAE\_CS42\_3DS\_TGACv D/HFKFEOBAGSIVYSFFFNAGTAGVWRISALINDAGGKERTVI DMDLAVRTALLGLKFFYYGAMKKSLELPSTFKAMR 341  
TRIAE\_CS42\_3DL\_TGACv D/HFKFEOBAGSIVYSFFFNAGTAGVWRISALINDAGGKERTVI DMDLAVRTALKGWKFFYYGAMKKSLELPSTFKAMR 342  
TRIAE\_CS42\_3B\_TGACv1 D/HFKFEOBAGSIVYSFFFNAGTAGVWRISALINDAGGKERTVI DMDLAVRTALKGWKFFYYGAMKKSLELPSTFKAMR 340  
TRIAE\_CS42\_3B\_TGACv1 D/HFKFEOBAGSIVYSFFFNAGTAGVWRISALINDAGGKERTVI DMDLAVRTALKGWKFFYYGAMKKSLELPSTFKAMR 342  
TRIAE\_CS42\_6BS\_TGACv D/HFKFEOBAGSIVYSFFFNAGTAGVWRISALINDAGGKERTVI DMDLAVRTALKGWKFFYYGAMKKSLELPSTFKAMR 307  
TRIAE\_CS42\_6AS\_TGACv D/HFKFEOBAGSIVYSFFFNAGTAGVWRISALINDAGGKERTVI DMDLAVRTALKGWKFFYYGAMKKSLELPSTFKAMR 307  
TRIAE\_CS42\_7AL\_TGACv D/HFKFEOBAGSIVYSFFFNAGTAGVWRISALINDAGGKERTVI DMDLAVRTALKGWKFFYYGAMKKSLELPSTFKAMR 309  
TRIAE\_CS42\_U\_TGACv1 D/HFKFEOBAGSIVYSFFFNAGTAGVWRISALINDAGGKERTVI DMDLAVRTALKGWKFFYYGAMKKSLELPSTFKAMR 303  
TRIAE\_CS42\_U\_TGACv1 D/HFKFEOBAGSIVYSFFFNAGTAGVWRISALINDAGGKERTVI DMDLAVRTALKGWKFFYYGAMKKSLELPSTFKAMR 313  
TRIAE\_CS42\_7BL\_TGACv D/HFKFEOBAGSIVYSFFFNAGTAGVWRISALINDAGGKERTVI DMDLAVRTALKGWKFFYYGAMKKSLELPSTFKAMR 310  
TRIAE\_CS42\_7AL\_TGACv D/HFKFEOBAGSIVYSFFFNAGTAGVWRISALINDAGGKERTVI DMDLAVRTALKGWKFFYYGAMKKSLELPSTFKAMR 306  
TRIAE\_CS42\_7BL\_TGACv D/HFKFEOBAGSIVYSFFFNAGTAGVWRISALINDAGGKERTVI DMDLAVRTALKGWKFFYYGAMKKSLELPSTFKAMR 306  
TRIAE\_CS42\_7DL\_TGACv D/HFKFEOBAGSIVYSFFFNAGTAGVWRISALINDAGGKERTVI DMDLAVRTALKGWKFFYYGAMKKSLELPSTFKAMR 306  
TRIAE\_CS42\_2AL\_TGACv D/HFSVBOEVGSACHGFFFNAGTAGVWRISALINDAGGKERTVI DMDLAVRASMRGWRFFYYGDMKKSLELPSSFKAMR 314  
TRIAE\_CS42\_2DL\_TGACv D/HFSVBOEVGSACHGFFFNAGTAGVWRISALINDAGGKERTVI DMDLAVRASMRGWRFFYYGDMKKSLELPSSFKAMR 334  
TRIAE\_CS42\_2BL\_TGACv D/HFSVBOEVGSACHGFFFNAGTAGVWRISALINDAGGKERTVI DMDLAVRASMRGWRFFYYGDMKKSLELPSSFKAMR 315  
TRIAE\_CS42\_1AS\_TGACv D/HFSVBOEVGSACHGFFFNAGTAGVWRISALINDAGGKERTVI DMDLAVRASMRGWRFFYYGDMKKSLELPSSFKAMR 305  
TRIAE\_CS42\_7DS\_TGACv D/HFKFEOBAGSIVYSFFFNAGTAGVWRISALINDAGGKERTVI DMDLAVRAGLKGWFFYYGDMKKSLELPSSFKAMR 337  
TRIAE\_CS42\_7AS\_TGACv D/HFKFEOBAGSIVYSFFFNAGTAGVWRISALINDAGGKERTVI DMDLAVRAGLKGWFFYYGDMKKSLELPSSFKAMR 343  
TRIAE\_CS42\_7DL\_TGACv D/HFKFEOBAGSIVYSFFFNAGTAGVWRISALINDAGGKERTVI DMDLAVRAGLKGWFFYYGDMKKSLELPSSFKAMR 339  
TRIAE\_CS42\_6DS\_TGACv D/HFKFEOBAGSIVYSFFFNAGTAGVWRISALINDAGGKERTVI DMDLAVRAGLKGWFFYYGDMKKSLELPSSFKAMR 320  
TRIAE\_CS42\_6BS\_TGACv D/HFKFEOBAGSIVYSFFFNAGTAGVWRISALINDAGGKERTVI DMDLAVRAGLKGWFFYYGDMKKSLELPSSFKAMR 317  
TRIAE\_CS42\_6AS\_TGACv D/HFKFEOBAGSIVYSFFFNAGTAGVWRISALINDAGGKERTVI DMDLAVRAGLKGWFFYYGDMKKSLELPSSFKAMR 317  
TRIAE\_CS42\_2BS\_TGACv D/HFKFEOBAGSIVYSFFFNAGTAGVWRISALINDAGGKERTVI DMDLAVRATLKGWFFYYGDMKKSLEPSTFKAMR 371  
TRIAE\_CS42\_2DS\_TGACv D/HFKFEOBAGSIVYSFFFNAGTAGVWRISALINDAGGKERTVI DMDLAVRATLKGWFFYYGDMKKSLEPSTFKAMR 371  
TRIAE\_CS42\_2AS\_TGACv D/HFKFEOBAGSIVYSFFFNAGTAGVWRISALINDAGGKERTVI DMDLAVRATLKGWFFYYGDMKKSLEPSTFKAMR 370  
TRIAE\_CS42\_2AS\_TGACv D/HFKFEOBAGSIVYSFFFNAGTAGVWRISALINDAGGKERTVI DMDLAVRATLKGWFFYYGDMKKSLEPSSFKAMR 369  
TRIAE\_CS42\_2DS\_TGACv D/HFKFEOBAGSIVYSFFFNAGTAGVWRISALINDAGGKERTVI DMDLAVRATLKGWFFYYGDMKKSLEPSSFKAMR 671

TRIAE\_CS42\_3AS\_TGACv QOHRW CGPANFRKMLVETLHNKKVFWSKLHLYFFFYGKLAHTVTFIYYCFIPVSVFPP--EIQIPLWGVVY 415  
TRIAE\_CS42\_3B\_TGACv1 QOHRW CGPANFRKMLVETLHNKKVFWSKLHLYFFFYGKLAHTVTFIYYCFIPVSVFPP--EIQIPLWGVVY 781  
TRIAE\_CS42\_3B\_TGACv1 QOHRW CGPANFRKMLVETLHNKKVFWSKLHLYFFFYGKLAHTVTFIYYCFIPVSVFPP--EIQIPLWGVVY 419  
TRIAE\_CS42\_3DS\_TGACv QOHRW CGPANFRKMLVETLHNKKVFWSKLHLYFFFYGKLAHTVTFIYYCFIPVSVFPP--EIQIPLWGVVY 417  
TRIAE\_CS42\_3DS\_TGACv QOHRW CGPANFRKMLVETLHNKKVFWSKLHLYFFFYGKLAHTVTFIYYCFIPVSVFPP--EIQIPLWGVVY 419  
TRIAE\_CS42\_3DL\_TGACv QOHRW CGPANFRKMLVETLHNKKVFWSKLHLYFFFYGKLAHTVTFIYYCFIPVSVFPP--EIQIPLWGVVY 420  
TRIAE\_CS42\_3B\_TGACv1 QOHRW CGPANFRKMLVETLHNKKVFWSKLHLYFFFYGKLAHTVTFIYYCFIPVSVFPP--EIQIPLWGVVY 418  
TRIAE\_CS42\_3AL\_TGACv QOHRW CGPANFRKMLVETLHNKKVFWSKLHLYFFFYGKLAHTVTFIYYCFIPVSVFPP--EIQIPLWGVVY 420  
TRIAE\_CS42\_6BS\_TGACv QOHRW CGPANFRKMLVETLHNKKVFWSKLHLYFFFYGKLAHTVTFIYYCFIPVSVFPP--EIQIPLWGVVY 385  
TRIAE\_CS42\_6AS\_TGACv QOHRW CGPANFRKMLVETLHNKKVFWSKLHLYFFFYGKLAHTVTFIYYCFIPVSVFPP--EIQIPLWGVVY 385  
TRIAE\_CS42\_7AL\_TGACv QOHRW CGPANFRKMLVETLHNKKVFWSKLHLYFFFYGKLAHTVTFIYYCFIPVSVFPP--EIQIPLWGVVY 387  
TRIAE\_CS42\_U\_TGACv1 QOHRW CGPANFRKMLVETLHNKKVFWSKLHLYFFFYGKLAHTVTFIYYCFIPVSVFPP--EIQIPLWGVVY 381  
TRIAE\_CS42\_U\_TGACv1 QOHRW CGPANFRKMLVETLHNKKVFWSKLHLYFFFYGKLAHTVTFIYYCFIPVSVFPP--EIQIPLWGVVY 395  
TRIAE\_CS42\_7BL\_TGACv QOHRW CGPANFRKMLVETLHNKKVFWSKLHLYFFFYGKLAHTVTFIYYCFIPVSVFPP--EIQIPLWGVVY 371  
TRIAE\_CS42\_7AL\_TGACv QOHRW CGPANFRKMLVETLHNKKVFWSKLHLYFFFYGKLAHTVTFIYYCFIPVSVFPP--EIQIPLWGVVY 384  
TRIAE\_CS42\_7BL\_TGACv QOHRW CGPANFRKMLVETLHNKKVFWSKLHLYFFFYGKLAHTVTFIYYCFIPVSVFPP--EIQIPLWGVVY 384  
TRIAE\_CS42\_7DL\_TGACv QOHRW CGPANFRKMLVETLHNKKVFWSKLHLYFFFYGKLAHTVTFIYYCFIPVSVFPP--EIQIPLWGVVY 384  
TRIAE\_CS42\_2AL\_TGACv QOHRW CGPANFRKMLVETLHNKKVFWSKLHLYFFFYGKLAHTVTFIYYCFIPVSVFPP--EIQIPLWGVVY 394  
TRIAE\_CS42\_2DL\_TGACv QOHRW CGPANFRKMLVETLHNKKVFWSKLHLYFFFYGKLAHTVTFIYYCFIPVSVFPP--EIQIPLWGVVY 414  
TRIAE\_CS42\_2BL\_TGACv QOHRW CGPANFRKMLVETLHNKKVFWSKLHLYFFFYGKLAHTVTFIYYCFIPVSVFPP--EIQIPLWGVVY 395  
TRIAE\_CS42\_1AS\_TGACv QOHRW CGPANFRKMLVETLHNKKVFWSKLHLYFFFYGKLAHTVTFIYYCFIPVSVFPP--EIQIPLWGVVY 385  
TRIAE\_CS42\_7DS\_TGACv QOHRW CGANFRKMGAEILLTKEVSLWKKLYLYSFFLRKVVHVLVFPVLYCVIPFSVLIP--EIKIPAWGVVY 415  
TRIAE\_CS42\_7AS\_TGACv QOHRW CGANFRKMGAEILLTKEVSLWKKLYLYSFFLRKVVHVLVFPVLYCVIPFSVLIP--EIKIPAWGVVY 421  
TRIAE\_CS42\_7BS\_TGACv QOHRW CGANFRKMGAEILLTKEVSLWKKLYLYSFFLRKVVHVLVFPVLYCVIPFSVLIP--EIKIPAWGVVY 417  
TRIAE\_CS42\_6DS\_TGACv QOHRW CGANFRKMGAEILLTKEVSLWKKLYLYSFFLRKVVHVLVFPVLYCVIPFSVLIP--EIKIPAWGVVY 398  
TRIAE\_CS42\_6BS\_TGACv QOHRW CGANFRKMGAEILLTKEVSLWKKLYLYSFFLRKVVHVLVFPVLYCVIPFSVLIP--EIKIPAWGVVY 395  
TRIAE\_CS42\_6AS\_TGACv QOHRW CGANFRKMGAEILLTKEVSLWKKLYLYSFFLRKVVHVLVFPVLYCVIPFSVLIP--EIKIPAWGVVY 395  
TRIAE\_CS42\_2BS\_TGACv QOHRW CGAHFRKVAKDIITAKDVLIKKPHMILYSFFLRKVVHVLVFPVLYCVIPFSVLIP--EIKIPAWGVVY 449  
TRIAE\_CS42\_2DS\_TGACv QOHRW CGAHFRKVAKDIITAKDVLIKKPHMILYSFFLRKVVHVLVFPVLYCVIPFSVLIP--EIKIPAWGVVY 449  
TRIAE\_CS42\_2AS\_TGACv QOHRW CGAHFRKVAKDIITAKDVLIKKPHMILYSFFLRKVVHVLVFPVLYCVIPFSVLIP--EIKIPAWGVVY 448  
TRIAE\_CS42\_2AS\_TGACv QOHRW CGANFRKVAIDITLTKDVLVVKKPYMILYSFFLRKVVHVLVFPVLYCVIPFSVLIP--EIKIPAWGVVY 447  
TRIAE\_CS42\_2DS\_TGACv QOHRW CGANFRKVAIDITLTKDVLVVKKPYMILYSFFLRKVVHVLVFPVLYCVIPFSVLIP--EIKIPAWGVVY 749

TRIAE\_CS42\_3AS\_TGACv PTVITLCKALGSPSSFHLVILWVLFENVMSLHRIKATITGLLDARRVNEWVTEKLGDKANTEPAMEGLDNDVQVIDVELS 495  
TRIAE\_CS42\_3B\_TGACv1 PTVITLCKALGSPSSFHLVILWVLFENVMSLHRIKATITGLLDARRVNEWVTEKLGDKANTEPAMEGLDNDVQVIDVELS 861  
TRIAE\_CS42\_3B\_TGACv1 PTVITLCKALGSPSSFHLVILWVLFENVMSLHRIKATITGLLDARRVNEWVTEKLGDKANTEPAMEGLDNDVQVIDVELS 499  
TRIAE\_CS42\_3DS\_TGACv PTVITLCKALGSPSSFHLVILWVLFENVMSLHRIKATITGLLDARRVNEWVTEKLGDKANTEPAMEGLDNDVQVIDVELS 497  
TRIAE\_CS42\_3DS\_TGACv PTVITLCKALGSPSSFHLVILWVLFENVMSLHRIKATITGLLDARRVNEWVTEKLGDKANTEPAMEGLDNDVQVIDVELS 499  
TRIAE\_CS42\_3DL\_TGACv PTVITLCKALGSPSSFHLVILWVLFENVMSLHRIKATITGLLDARRVNEWVTEKLGDKANTEPAMEGLDNDVQVIDVELS 500  
TRIAE\_CS42\_3B\_TGACv1 PTVITLCKALGSPSSFHLVILWVLFENVMSLHRIKATITGLLDARRVNEWVTEKLGDKANTEPAMEGLDNDVQVIDVELS 498  
TRIAE\_CS42\_3AL\_TGACv PTVITLCKALGSPSSFHLVILWVLFENVMSLHRIKATITGLLDARRVNEWVTEKLGDKANTEPAMEGLDNDVQVIDVELS 500  
TRIAE\_CS42\_6BS\_TGACv PTIIILLNSVGTPRSFLHLLFFWILFENVMSLHRIKATITGLLEAGRANVNEWTEKLG-----SAMKMK 448  
TRIAE\_CS42\_6AS\_TGACv PTIIILLNSVGTPRSFLHLLFFWILFENVMSLHRIKATITGLLEAGRANVNEWTEKLG-----SAMKMK 448  
TRIAE\_CS42\_7AL\_TGACv PTIIILLNAVGTPRSFLHLLFFWILFENVMSLHRIKATITGLLEAGTANVNEWTEKLG-----DTLKAK 450  
TRIAE\_CS42\_U\_TGACv1 PTIIILLNAVGTPRSFLHLLFFWILFENVMSLHRIKATITGLLEAGTANVNEWTEKLG-----DTLKAK 444  
TRIAE\_CS42\_U\_TGACv1 PAIITLLSVGTPRSFLHLLFFWILFENVMSLHRIKATITGLLEAGTANVNEWTEKLG-----DTVTKK 454  
TRIAE\_CS42\_7BL\_TGACv PTIIILLNAVGTPRSFLHLLFFWILFENVMSLHRIKATITGLLEAGTANVNEWTEKLG-----DTVTKK 375

TRIAE\_CS42\_7AL\_TGACv PTVITLLNAVGTPRSFLVIFWVLFENVMSLHRTKATFSGLLELGRVNEWVTEKLG-----DILKMK 447  
 TRIAE\_CS42\_7BL\_TGACv PTVITLLNAVGTPRSFLVIFWVLFENVMSLHRTKATFSGLLELGRVNEWVTEKLG-----DVLKMK 447  
 TRIAE\_CS42\_7DL\_TGACv PTIITLLNAVGTPRSFLVIFWVLFENVMSLHRTKATFSGLLELGRVNEWVTEKLG-----DVLKMK 447  
 TRIAE\_CS42\_2AL\_TGACv PAIITLLNAVCTPRSHLLVFWLIFENVMMSHRKATIIGLVEASRANNEWVTEKLGSV-----TS-TPAAT 461  
 TRIAE\_CS42\_2DL\_TGACv PAIITLLNAVCTPRSHLLVFWLIFENVMMSHRKATIIGLVEASRANNEWVTEKLGSV-----TSSTPAAT 482  
 TRIAE\_CS42\_2BL\_TGACv PAIITLLNAVCTPRSHLLVFWLIFENVMMSHRKATIIGLVEASRANNEWVTEKLGSV-----TS-TPAAT 462  
 TRIAE\_CS42\_1AS\_TGACv AAVLITLLNAVCTPRSCHLLVFWLIFENVMMSHRKATIIGLVEASRANNEWVTEKLGGS-----TTSTPAAT 453  
 TRIAE\_CS42\_7DS\_TGACv PTAITVLYAVRNPSSIHFIWFILFENVMFSHRTKATFIGLLELGSVNEWVTEKLG-----SASNT 477  
 TRIAE\_CS42\_7AS\_TGACv PTAITVLYAVRNPSSIHFIWFILFENVMFSHRTKATFIGLLELGSVNEWVTEKLG-----SVSNT 483  
 TRIAE\_CS42\_7BS\_TGACv PTAITVLYAVRNPSSIHFIWFILFENVMFSHRTKATFIGLLELGSVNEWVTEKLG-----SVSNT 479  
 TRIAE\_CS42\_6DS\_TGACv PTAITVMNAIRNPGSLHLMFPWILFENVMMSHRMRAALTGLLETAHVNDWVTEKVG-----DLVKDD 461  
 TRIAE\_CS42\_6BS\_TGACv PTAITVMNAIRNPGSLHLMFPWILFENVMMSHRMRAALTGLLETAHVNDWVTEKVG-----DLVKDD 458  
 TRIAE\_CS42\_6AS\_TGACv PTAITVMNAIRNPGSLHLMFPWILFENVMMSHRMRAALTGLLETAHVNDWVTEKVG-----DVVKDD 458  
 TRIAE\_CS42\_2AS\_TGACv PTVLLVVTAIRHPKNLHLPFWILFESVMTMHRMRAALSGLFELSEFNWVTKKTG-----NNFE 510  
 TRIAE\_CS42\_2AS\_TGACv PAVLLVVTAIRNPKNIHLLPFWILFESVMTIHRTRAALVGLFELSEFNWVTKKTG-----NNFE 508  
 TRIAE\_CS42\_2DS\_TGACv PTVLLVVTAIRNPKNIHLLPFWILFESVMTIHRTRAALVGLFELTEFDEWLVTKKTG-----NNFE 810  
  
 TRIAE\_CS42\_3AS\_TGACv TPLVPKLEKRRTRLWDKYNCEIFVGTCTIICGCDVLYA-NKGYIYLFIQGLAFVIGFEYIGTRPPNTE----- 566  
 TRIAE\_CS42\_3B\_TGACv1 TPLVPKLEKR-----YNCSEIFVGTCTIICGCDVLYA-NKGYIYLFIQGLAFVIGFEYIGTRPPGAE----- 925  
 TRIAE\_CS42\_3B\_TGACv1 TPLVPKLEKRRTRLWHKYNCEIFVGTCTIICGCDVLYA-KKGYIYLFIQGLAFVIGFEYIGTRPPSTE----- 570  
 TRIAE\_CS42\_3DS\_TGACv TPLVPKLEKRRTRLWDKYNCEIFVGTCTIICGCDVLYA-NKGYIYLFIQGLAFVIGFEYIGTRPPSIE----- 568  
 TRIAE\_CS42\_3DS\_TGACv TPLVPKLEKRRTRLWDKYNCEIFVGTCTIICGCDVLYA-KKGYIYLFIQGLAFVIGFEYIGTRPPSAE----- 570  
 TRIAE\_CS42\_3DL\_TGACv TPLVPKLEKRRTRLWDKYNCEIFVGTCTIICGCDVLYA-NKGYIYLFIQGLAFVIGFEYIGTRPPPSA----- 572  
 TRIAE\_CS42\_3B\_TGACv1 TPLVPKLEKRRTRLWDKYNCEIFVGTCTIICGCDVLYA-NKGYIYLFIQGLAFVIGFEYIGTRPPPSAG----- 571  
 TRIAE\_CS42\_3AL\_TGACv TPLVPKLEKRRTRLWDKYNCEIFVGTCTIICGCDVLYA-NKGYIYLFIQGLAFVIGFEYIGTRPPPSAE----- 573  
 TRIAE\_CS42\_6BS\_TGACv SANKASARKSFMRMWERLNVPELGVGAFLESCGWYDVAFG-KDNFFIYLFQSMAFFVVGVGVIPTVPS----- 518  
 TRIAE\_CS42\_6AS\_TGACv SANKASARKSFMRMWERLNVPELGVGAFLESCGWYDVAFG-KDNFFIYLFQSMAFFVVGVGVIPTVPS----- 518  
 TRIAE\_CS42\_7AL\_TGACv MPKALK-KLRMRIGERLHLWELGVAAYFLCAGYDVSFG-NNRYFIFLQMSIAFFVVGVGVIPTVPS----- 518  
 TRIAE\_CS42\_U\_TGACv1 MPKALK-KLRMRIGERLHLWELGVAAYFLCAGYDVSFG-NNRYFIFLQMSIAFFVVGVGVIPTVPS----- 512  
 TRIAE\_CS42\_U\_TGACv1 MPKALK-KLRMRIGERLHLWELGVAAYFLCAGYDVSFG-NNRYFIFLQMSIAFFVVGVGVIPTVPS----- 522  
 TRIAE\_CS42\_7BL\_TGACv VQSKVTK-KLRMRIERLQLELGVAAIYFFCGSYDLLFG-KRYIYIFLQMSIAFFVVGVGVIPTVPS----- 375  
 TRIAE\_CS42\_7AL\_TGACv VQSKVTK-KLRMRIERLQLELGVAAIYFFCGSYDLLFG-KRYIYIFLQMSIAFFVVGVGVIPTVPS----- 515  
 TRIAE\_CS42\_7BL\_TGACv VQSKVTK-KLRMRIERLQLELGVAAIYFFCGSYDLLFG-KRYIYIFLQMSIAFFVVGVGVIPTVPS----- 515  
 TRIAE\_CS42\_7DL\_TGACv VQSKVTK-KLRMRIERYIIIGLLMCSQLSYLNFMNES-GCSFWSLVLPQISSFVETTFCLAKDITISFSSCNPSLS 525  
 TRIAE\_CS42\_2AL\_TGACv TMAATNGAMKKKSSQSSILAPEIVMGLCLLYCAVDIVFG-HDFYVYLLMQSAAAFVIGFVGVSQ----- 527  
 TRIAE\_CS42\_2DL\_TGACv TMAATNGAMKKKSSQSSILAPEIVMGLCLLYCAVDIVFG-HDFYVYLLMQSAAAFVIGFVGVSQ----- 548  
 TRIAE\_CS42\_2BL\_TGACv TMAATNGAMKKKSSQSSILAPEIVMGLCLLYCAVDIVFG-HDFYVYLLMQSAAAFVIGFVGVSQ----- 528  
 TRIAE\_CS42\_1AS\_TGACv TTMVAK----KKSSSFLAPEIVMGLFLYCALYDIVFG-HDFYVYLLMQSAAAFVIGFVGVSQ----- 515  
 TRIAE\_CS42\_7DS\_TGACv KPVPQILERPRCFWRDRTVSELLFAVFLVCATYNLVYG-SDFYFIYIYLQAITFIIIVGTGFCGTSNS----- 545  
 TRIAE\_CS42\_7AS\_TGACv KPVPQILERPRCFWRDRTVSELLFAVFLVCATYNLVYG-SDFYFIYIYLQAITFIIIVGTGFCGTSNS----- 551  
 TRIAE\_CS42\_7BS\_TGACv KPVPQILERPRCFWRDRTVSELLFAVFLVCATYNLVYG-SDFYFIYIYLQAITFIIIVGTGFCGTSNS----- 547  
 TRIAE\_CS42\_6DS\_TGACv FDVPLLEPLKPTCEVERIYIPELLLALYLLICASYDYVLG-SQTYFMIYIYLQALAFIVLGFVGMKTPCS----- 531  
 TRIAE\_CS42\_6BS\_TGACv FDVPLLEPLKPTCEVERIYIPELLLALYLLICASYDYVLG-SQTYFMIYIYLQALAFIVLGFVGMKTPCS----- 528  
 TRIAE\_CS42\_6AS\_TGACv FEVPLLEPLKPTCEVERIYIPELLLALYLLICASYDYVLG-SQTYFMIYIYLQALAFIVLGFVGMKTPCS----- 528  
 TRIAE\_CS42\_2BS\_TGACv DNEVPLLQKTRKRLDRVNFREIVSFAFLFFCASYNLVFPCKTRYFNLYLQGLAFVCLGLNFTGTCSCCQ----- 581  
 TRIAE\_CS42\_2DS\_TGACv DNEVPLLQKTRKRLDRVNFREIVSFAFLFFCASYNLVFPCKTRYFNLYLQGLAFVCLGLNFTGTCSCCQ----- 581  
 TRIAE\_CS42\_2AS\_TGACv DNEVPLLQKTRKRLDRVNFREIVSFAFLFFCASYNLVFPCKTRYFNLYLQGLAFVCLGLNFTGTCSCCQ----- 580  
 TRIAE\_CS42\_2AS\_TGACv DNEVPLLQKTRKRLDRVNFREIVSFAFLFFCASYNLVFPCKTRYFNLYLQGLAFVCLGLNFTGTCSCCQ----- 579  
 TRIAE\_CS42\_2DS\_TGACv DNVVPLLQKTRKRLDRVNFREIVSFAFLFFCASYNLVFPCKTRYFNLYLQGLAFVCLGLNFTGTCSCCQ----- 881  
  
 TRIAE\_CS42\_3AS\_TGACv ----- 566  
 TRIAE\_CS42\_3B\_TGACv1 ----- 925  
 TRIAE\_CS42\_3B\_TGACv1 ----- 570  
 TRIAE\_CS42\_3DS\_TGACv ----- 568  
 TRIAE\_CS42\_3DS\_TGACv ----- 570  
 TRIAE\_CS42\_3DL\_TGACv ----- 572  
 TRIAE\_CS42\_3B\_TGACv1 ----- 571  
 TRIAE\_CS42\_3AL\_TGACv ----- 573  
 TRIAE\_CS42\_6BS\_TGACv ----- 518  
 TRIAE\_CS42\_6AS\_TGACv ----- 518  
 TRIAE\_CS42\_7AL\_TGACv ----- 518  
 TRIAE\_CS42\_U\_TGACv1 ----- 512  
 TRIAE\_CS42\_U\_TGACv1 ----- 522  
 TRIAE\_CS42\_7BL\_TGACv ----- 375  
 TRIAE\_CS42\_7AL\_TGACv ----- 515  
 TRIAE\_CS42\_7BL\_TGACv ----- 515  
 TRIAE\_CS42\_7DL\_TGACv ----- 525  
 TRIAE\_CS42\_2AL\_TGACv ----- 527  
 TRIAE\_CS42\_2DL\_TGACv ----- 548  
 TRIAE\_CS42\_2BL\_TGACv ----- 528  
 TRIAE\_CS42\_1AS\_TGACv ----- 515  
 TRIAE\_CS42\_7DS\_TGACv ----- 545  
 TRIAE\_CS42\_7AS\_TGACv ----- 551  
 TRIAE\_CS42\_7BS\_TGACv ----- 547  
 TRIAE\_CS42\_6DS\_TGACv ----- 531  
 TRIAE\_CS42\_6BS\_TGACv ----- 528  
 TRIAE\_CS42\_6AS\_TGACv ----- 528  
 TRIAE\_CS42\_2BS\_TGACv ----- 581  
 TRIAE\_CS42\_2DS\_TGACv ----- 581  
 TRIAE\_CS42\_2AS\_TGACv ----- 580  
 TRIAE\_CS42\_2AS\_TGACv ----- 579  
 TRIAE\_CS42\_2DS\_TGACv ----- 881  
  
 TRIAE\_CS42\_3AS\_TGACv ----- 566  
 TRIAE\_CS42\_3B\_TGACv1 ----- 925  
 TRIAE\_CS42\_3B\_TGACv1 ----- 570  
 TRIAE\_CS42\_3DS\_TGACv ----- 568  
 TRIAE\_CS42\_3DS\_TGACv ----- 570  
 TRIAE\_CS42\_3DL\_TGACv ----- 572  
 TRIAE\_CS42\_3B\_TGACv1 ----- 571  
 TRIAE\_CS42\_3AL\_TGACv ----- 573  
 TRIAE\_CS42\_6BS\_TGACv ----- 518  
 TRIAE\_CS42\_6AS\_TGACv ----- 518  
 TRIAE\_CS42\_7AL\_TGACv ----- 518  
 TRIAE\_CS42\_U\_TGACv1 ----- 512  
 TRIAE\_CS42\_U\_TGACv1 ----- 522  
 TRIAE\_CS42\_7BL\_TGACv ----- 375  
 TRIAE\_CS42\_7AL\_TGACv ----- 515  
 TRIAE\_CS42\_7BL\_TGACv ----- 515  
 TRIAE\_CS42\_7DL\_TGACv ----- 525  
 TRIAE\_CS42\_2AL\_TGACv ----- 527  
 TRIAE\_CS42\_2DL\_TGACv ----- 548  
 TRIAE\_CS42\_2BL\_TGACv ----- 528  
 TRIAE\_CS42\_1AS\_TGACv ----- 515  
 TRIAE\_CS42\_7DS\_TGACv ----- 545  
 TRIAE\_CS42\_7AS\_TGACv ----- 551  
 TRIAE\_CS42\_7BS\_TGACv ----- 547  
 TRIAE\_CS42\_6DS\_TGACv ----- 531  
 TRIAE\_CS42\_6BS\_TGACv ----- 528  
 TRIAE\_CS42\_6AS\_TGACv ----- 528  
 TRIAE\_CS42\_2BS\_TGACv ----- 581  
 TRIAE\_CS42\_2DS\_TGACv ----- 581  
 TRIAE\_CS42\_2AS\_TGACv ----- 580  
 TRIAE\_CS42\_2AS\_TGACv ----- 579  
 TRIAE\_CS42\_2DS\_TGACv ----- 881

Fig. S\_2B: *CsIC* subfamily.

| S.No | Gene name with number of splice variants (CsIC)   | No. of amino acids (aa) |
|------|---------------------------------------------------|-------------------------|
| 1    | TRIAE_CS42_1DL_TGACv1_062162_AA0209740.1          | 690 aa                  |
| 2    | TRIAE_CS42_1BL_TGACv1_030501_AA0092480.1          | 656 aa                  |
| 3    | TRIAE_CS42_5BL_TGACv1_404820_AA1311790.1_3_SPLICE | 712 aa                  |
| 4    | TRIAE_CS42_5DL_TGACv1_435778_AA1454840.1_2_SPLICE | 708 a                   |
| 5    | TRIAE_CS42_5AL_TGACv1_374268_AA1195590.3_3_SPLICE | 703 aa                  |
| 6    | TRIAE_CS42_1DL_TGACv1_061928_AA0205730.1          | 702 aa                  |
| 7    | TRIAE_CS42_1BL_TGACv1_030750_AA0099830.1          | 702 aa                  |
| 8    | TRIAE_CS42_1AL_TGACv1_001272_AA0028090.1          | 702 aa                  |
| 9    | TRIAE_CS42_3DL_TGACv1_251593_AA0882850.1_3_SPLICE | 704 aa                  |
| 10   | TRIAE_CS42_3AL_TGACv1_197197_AA0665370.1_3_SPLICE | 704 aa                  |
| 11   | TRIAE_CS42_3DS_TGACv1_271926_AA0910940.1          | 758 aa                  |
| 12   | TRIAE_CS42_3B_TGACv1_220758_AA0718310.2           | 751 aa                  |
| 13   | TRIAE_CS42_3AS_TGACv1_211225_AA0686890.2          | 750 aa                  |

TRIAE\_CS42\_1DL\_TGACv1 ---MAPSFWGREAR--LSDGGGGTPVVVKMENPNWS SEMEQEAVPGSPAGLAAGK-----AGRGNARQITWVLLLK 68  
 TRIAE\_CS42\_1BL\_TGACv1 ---MAPSFWGREAR--LSDGGGGTPVVVKMENPNWS SEMEQEAVPGSPAGLAAGK-----AGRGNARQITWVLLLK 68  
 TRIAE\_CS42\_1AL\_TGACv1 ---MAPSFWGREAR--LSDGGGGTPVVVKMENPNWS SEMEQEAVPGSPAGLAAGK-----AGRGNARQITWVLLLK 68  
 TRIAE\_CS42\_3DL\_TGACv1 ---MAPWQGQEARGGVSGGVTGTPVVVKMCTPDWA SEVPPPGSP----AAGK-----DGRGNARQITWVLLLK 64  
 TRIAE\_CS42\_3AL\_TGACv1 ---MAPWQGQEARGGVSGGVTGTPVVVKMCTPDWA SEVPPPGSP----AAGK-----DGRGNARQITWVLLLK 64  
 TRIAE\_CS42\_1DL\_TGACv1 MAPWNLWGGRAAIAGGN-AYRDMFVIVKMNPNWS SEINGGGDNGEDFLARVGG-----QRRRVKNTKQITWVFLK 73  
 TRIAE\_CS42\_1BL\_TGACv1 ---MKNPNWS SEINIDDDNSEDFLARVGG-----QRRRVKNTKQITWVFLK 45  
 TRIAE\_CS42\_5BL\_TGACv1 MAPWTGLWGARAGAGAGAYRGTTPVVVKMENPNWS SEISPEDAEDDFLVSGAGAARRSRKGGKGNARQITWVLLLK 80  
 TRIAE\_CS42\_5DL\_TGACv1 MAPWTGLWGARAGAGAG--AYRGTTPVVVKMENPNWS SEISPEDAEDDFLVSGAGAARR-RKGGKGNARQITWVLLLK 77  
 TRIAE\_CS42\_5AL\_TGACv1 MAPWTGLWGARAGAGAYR---GTPVVVKMENPNWS SEISPEDAEDDFLVSGAGAARR-RKGGKGNARQITWVLLLK 72  
 TRIAE\_CS42\_3DS\_TGACv1 -----MASSWWDKEEHGTPVVVKMNPYSLVEIDGPGMDSSEK-----ARRSKNAQKQFVWLLLR 56  
 TRIAE\_CS42\_3B\_TGACv1 -----MASSWWDKEEHGTPVVVKMNPYSLVEIDGPGMDSSEK-----ARRSKNAQKQFVWLLLR 56  
 TRIAE\_CS42\_3AS\_TGACv1 -----MASSWWDKEEHGTPVVVKMNPYSLVEIDGPGMDSSEK-----ARRSKNAQKQFVWLLLR 56

TRIAE\_CS42\_1DL\_TGACv1 AHRAAGRI TGAASALAVAAAARRRVAAGR TDGDAAPG-----ESTALRA FYGCLRIFVVLSSMLLAVEVAAAYLQG 140  
 TRIAE\_CS42\_1BL\_TGACv1 AHRAAGRI TGAASALAVAAAARRRVAAGR TDGDAAPG-----ESTALRA FYGCLRIFVVLSSMLLAVEVAAAYLQG 140  
 TRIAE\_CS42\_1AL\_TGACv1 AHRAAGRI TGAASALAVAAAARRRVAAGR TDGDAAPG-----ESTALRA FYGCLRIFVVLSSMLLAVEVAAAYLQG 140  
 TRIAE\_CS42\_3DL\_TGACv1 AHRAAGKI TGAATALSAAAARRRVAAGR TDSADNAPPGLG---GSPALRT LYGFTRASLLLSVLLLAADVAAHAQG 141  
 TRIAE\_CS42\_3AL\_TGACv1 AHRAAGKI TGAATALSAAAARRRVAAGR TDSADADGAPPFGGAGRPALRT LYGFTRASLLLSVLLLAADVAAHAQG 144  
 TRIAE\_CS42\_1DL\_TGACv1 AHRAAGCI AR TSSAVALGGAARRRVAAGR TDSADADGECEDVEERDPASRRS RYFTLTKACIMMSVFLLVVLAAYSN- 152  
 TRIAE\_CS42\_1BL\_TGACv1 AHRAAGCI SW TSSAVALGGAARRRVAAGR TDSNATDGECKDVEEWPASRRS RYFTLTKACIMMSVFLLVVLAAYSN- 124  
 TRIAE\_CS42\_5BL\_TGACv1 AHRAAGCI ASASAVT LGAAARRRVADGR TDADAGAPG-SAGES---PVLRS FYAFTRAFLLLSVLLLAAVEAARFHG 156  
 TRIAE\_CS42\_5DL\_TGACv1 AHRAAGCI ASASAVT LGAAARRRVADGR TDADAGATPGSAGES---PVLRS FYAFTRAFLLLSVLLLAAVEAARFHG 154  
 TRIAE\_CS42\_5AL\_TGACv1 AHRAAGCI ASASAVT LGAAARRRVADGR TDADAGAPG-PARES---PVLRS FYAFTRAFLLLSVLLLAAVEAARFHG 148  
 TRIAE\_CS42\_3DS\_TGACv1 AHRAAGCI AWLAGEFWGLLGAVNRVRRSR DADAEPDAEASGRGR-----MLGF LRAFLLSLAMLAFETAAYLKG 128  
 TRIAE\_CS42\_3B\_TGACv1 AHRAAGCI AWLAGEFWGLLGAVNRVRRSR DADAEPDAEASGRGR-----MLGF LRAFLLSLAMLAFETAAYLKG 128  
 TRIAE\_CS42\_3AS\_TGACv1 AHRAAGCI AWLAGEFWGLLGAVNRVRRSR DADAEPDAEASGRGR-----MLGF LRAFLLSLAMLAFETAAYLKG 128

TRIAE\_CS42\_1DL\_TGACv1 W-----HLQMPPEMPFGQLAMDGLLAVDCLAAAYAGMRRVRLQYIAPPPLQ 187  
 TRIAE\_CS42\_1BL\_TGACv1 W-----HLQMPPEMPFGQLAMDGLLAVDCLAAAYAGMRRVRLQYIAPPPLQ 187  
 TRIAE\_CS42\_1AL\_TGACv1 W-----HLQMPPEMPFGQLAMDGLLAVDCLAAAYAGMRRVRLQYIAPPPLQ 187  
 TRIAE\_CS42\_3DL\_TGACv1 W-----HLA-----LPDLEAVECLFAAGYAAAMRRAAYLGPALQ 177  
 TRIAE\_CS42\_3AL\_TGACv1 W-----HLA-----LPDLEAVECLFAAGYAAAMRRAAYLGPALQ 180  
 TRIAE\_CS42\_1DL\_TGACv1 -----GRVNLAFINSFNTSWIRFRATYVAPPPLQ 181  
 TRIAE\_CS42\_1BL\_TGACv1 -----GKGNLAFINSFNTSWIRFRATYVAPPPLQ 153  
 TRIAE\_CS42\_5BL\_TGACv1 WDLAA-----SALALPIGVESLYASWLRRLRAYLAPPLQ 191  
 TRIAE\_CS42\_5DL\_TGACv1 WDLAA-----SALALPIGVESLYASWLRRLRAYLAPPLQ 189  
 TRIAE\_CS42\_5AL\_TGACv1 WDLAA-----SALALPIGVESLYASWLRRLRAYLAPPLQ 183  
 TRIAE\_CS42\_3DS\_TGACv1 WHYFFRDLPEHYLRQLPEHLQNLPEHLRHLPENLRHLPDGLRMPEQQEIQCLWHRAYVAVLAFRIDYTAWATE 208  
 TRIAE\_CS42\_3B\_TGACv1 WHYFFRDLPEHYLRQLPEHLQ-----NLPENLRHLPENLRHLPDGLRMPEQQEIQCLWHRAYVAVLAFRIDYTAWATE 201  
 TRIAE\_CS42\_3AS\_TGACv1 WHYFFRDLPEHYLRQLPEHLQ-----LPEHLRHLPENLRHLPDGLRMPEQQEIQCLWHRAYVAVLAFRIDYTAWATE 201

TRIAE\_CS42\_1DL\_TGACv1 FLTNSCVVLFMTQSVDRIILCLGCLWIKLRGIRKFP---VPIAADKD-----DVEAGEDFPMVLVQMPMCNE 250  
 TRIAE\_CS42\_1BL\_TGACv1 FLTNSCVVLFMTQSVDRIILCLGCLWIKLRGIRKFP---VPIAADKD-----DVEAGEDFPMVLVQMPMCNE 250  
 TRIAE\_CS42\_1AL\_TGACv1 FLTNSCVVLFMTQSVDRIILCLGCLWIKLRGIRKFP---VPIAADKD-----DVEAGEDFPMVLVQMPMCNE 250  
 TRIAE\_CS42\_3DL\_TGACv1 FLTNACVVFMTQSADRIILCLGCFWIKLRGIRKFP---VPNAAGAGNGKGSDDVEAGACE--GDSPMVLVQMPMCNE 252  
 TRIAE\_CS42\_3AL\_TGACv1 FLTNACVVFMTQSADRIILCLGCFWIKLRGIRKFP---VPNAATAG---NGKGSDDVEAGACEEEEGEPMVLVQMPMCNE 254

TRIAE\_CS42\_1DL\_TGACv LLDACVVLFLVQSADRIQQLGCFYITVVKRIKPKLPLSPALA-----DADDPDAGYPMVLVQIPMCNE 245  
TRIAE\_CS42\_1BL\_TGACv LLDANACVVLFLVQSADRIQQLGCFYITVVKRIKPKLPLFLALS-----DADDPDAGYPMVLVQIPMCNE 247  
TRIAE\_CS42\_5BL\_TGACv FLTDACVVLFLVQSADRIQQLGCFYITVVKRIKPKLPLSPALP-----DADDPDAGYPMVLVQIPMCNE 255  
TRIAE\_CS42\_5DL\_TGACv FLTDACVVLFLVQSADRIQQLGCFYITVVKRIKPKLPLSPALP-----DADDPDAGYPMVLVQIPMCNE 253  
TRIAE\_CS42\_5AL\_TGACv FLTDACVVLFLVQSADRIQQLGCFYITVVKRIKPKLPLSPALP-----DADDPDAGYPMVLVQIPMCNE 247  
TRIAE\_CS42\_3DS\_TGACv KLSGFCIVLFLVQSADRIQQLGCFYITVVKRIKPKLPLSPALP-----YADDDLEDCDLGAYPMVLVQIPMCNE 283  
TRIAE\_CS42\_3B\_TGACv1 KLSGFCIVLFLVQSADRIQQLGCFYITVVKRIKPKLPLSPALP-----YADDDLEDCDLGAYPMVLVQIPMCNE 276  
TRIAE\_CS42\_3AS\_TGACv KLSGFCIVLFLVQSADRIQQLGCFYITVVKRIKPKLPLSPALP-----YADDDLEDCDLGAYPMVLVQIPMCNE 275

TRIAE\_CS42\_1DL\_TGACv REVYQCSIGALCALDWPNSNELVQVLDSDSDATTSA LIKEVEKWRQREGVRIYRHRVIRG YKAGNLSAMN SYVKDY 330  
TRIAE\_CS42\_1BL\_TGACv REVYQCSIGALCALDWPNSNELVQVLDSDSDATTSA LIKEVEKWRQREGVRIYRHRVIRG YKAGNLSAMN SYVKDY 330  
TRIAE\_CS42\_1AL\_TGACv REVYQCSIGALCALDWPNSNELVQVLDSDSDATTSA LIKEVEKWRQREGVRIYRHRVIRG YKAGNLSAMN SYVKDY 330  
TRIAE\_CS42\_3DL\_TGACv KEVYQCSIGALCALDWPNSNELVQVLDSDSDATTSA LIKEVEKWRQREGVRIYRHRVIRG YKAGNLSAMN SYVKDY 332  
TRIAE\_CS42\_3AL\_TGACv KEVYQCSIGALCALDWPNSNELVQVLDSDSDATTSA LIKEVEKWRQREGVRIYRHRVIRG YKAGNLSAMN SYVKDY 334  
TRIAE\_CS42\_1DL\_TGACv KEVYQCSIGALCALDWPNSNELVQVLDSDSDATTSA LIKEVEKWRQREGVRIYRHRVIRG YKAGNLSAMN SYVKDY 325  
TRIAE\_CS42\_1BL\_TGACv KEVYQCSIGALCALDWPNSNELVQVLDSDSDATTSA LIKEVEKWRQREGVRIYRHRVIRG YKAGNLSAMN SYVKDY 297  
TRIAE\_CS42\_5BL\_TGACv KEVYQCSIGALCALDWPNSNELVQVLDSDSDATTSA LIKEVEKWRQREGVRIYRHRVIRG YKAGNLSAMN SYVKDY 335  
TRIAE\_CS42\_5DL\_TGACv KEVYQCSIGALCALDWPNSNELVQVLDSDSDATTSA LIKEVEKWRQREGVRIYRHRVIRG YKAGNLSAMN SYVKDY 333  
TRIAE\_CS42\_5AL\_TGACv KEVYQCSIGALCALDWPNSNELVQVLDSDSDATTSA LIKEVEKWRQREGVRIYRHRVIRG YKAGNLSAMN SYVKDY 327  
TRIAE\_CS42\_3DS\_TGACv KEVYETSISHVCOIDWPNSNELVQVLDSDSDATTSA LIKEVEKWRQREGVRIYRHRVIRG YKAGNLSAMN SYVKDY 363  
TRIAE\_CS42\_3B\_TGACv1 KEVYETSISHVCOIDWPNSNELVQVLDSDSDATTSA LIKEVEKWRQREGVRIYRHRVIRG YKAGNLSAMN SYVKDY 356  
TRIAE\_CS42\_3AS\_TGACv KEVYETSISHVCOIDWPNSNELVQVLDSDSDATTSA LIKEVEKWRQREGVRIYRHRVIRG YKAGNLSAMN SYVKDY 355

TRIAE\_CS42\_1DL\_TGACv EYVIFDADFQPIIDFLKRAMPHFGKDDVGLVQARWSFVNDENLLTRLQINLCLFHFVEVQVNGAFINFFGFNGTAG 410  
TRIAE\_CS42\_1BL\_TGACv EYVIFDADFQPIIDFLKRAMPHFGKDDVGLVQARWSFVNDENLLTRLQINLCLFHFVEVQVNGAFINFFGFNGTAG 410  
TRIAE\_CS42\_1AL\_TGACv EYVIFDADFQPIIDFLKRAMPHFGKDDVGLVQARWSFVNDENLLTRLQINLCLFHFVEVQVNGAFINFFGFNGTAG 410  
TRIAE\_CS42\_3DL\_TGACv EYVIFDADFQPIIDFLKRTVPHFGKDDVGLVQARWSFVNDENLLTRLQINLCLFHFVEVQVNGAFINFFGFNGTAG 412  
TRIAE\_CS42\_3AL\_TGACv EYVIFDADFQPIIDFLKRTVPHFGKDDVGLVQARWSFVNDENLLTRLQINLCLFHFVEVQVNGAFINFFGFNGTAG 414  
TRIAE\_CS42\_1DL\_TGACv EYVIFDADFQPIIDFLKRTVPHFGKDDVGLVQARWSFVNDENLLTRLQINLCLFHFVEVQVNGAFINFFGFNGTAG 405  
TRIAE\_CS42\_1BL\_TGACv EYVIFDADFQPIIDFLKRTVPHFGKDDVGLVQARWSFVNDENLLTRLQINLCLFHFVEVQVNGAFINFFGFNGTAG 377  
TRIAE\_CS42\_5BL\_TGACv EYVIFDADFQPIIDFLKRTVPHFGKDDVGLVQARWSFVNDENLLTRLQINLCLFHFVEVQVNGAFINFFGFNGTAG 415  
TRIAE\_CS42\_5DL\_TGACv EYVIFDADFQPIIDFLKRTVPHFGKDDVGLVQARWSFVNDENLLTRLQINLCLFHFVEVQVNGAFINFFGFNGTAG 413  
TRIAE\_CS42\_5AL\_TGACv EYVIFDADFQPIIDFLKRTVPHFGKDDVGLVQARWSFVNDENLLTRLQINLCLFHFVEVQVNGAFINFFGFNGTAG 407  
TRIAE\_CS42\_3DS\_TGACv EYVIFDADFQPIIDFLKRTVPHFGKDDVGLVQARWSFVNDENLLTRLQINLCLFHFVEVQVNGAFINFFGFNGTAG 443  
TRIAE\_CS42\_3B\_TGACv1 EYVIFDADFQPIIDFLKRTVPHFGKDDVGLVQARWSFVNDENLLTRLQINLCLFHFVEVQVNGAFINFFGFNGTAG 436  
TRIAE\_CS42\_3AS\_TGACv EYVIFDADFQPIIDFLKRTVPHFGKDDVGLVQARWSFVNDENLLTRLQINLCLFHFVEVQVNGAFINFFGFNGTAG 435

TRIAE\_CS42\_1DL\_TGACv VWRKALEDSGGWMERTTVDMDAVRAHLKGWKFLYLNDVBECCELPESYEAYRQOHRWISGPMQLFRICFVDITRSK 490  
TRIAE\_CS42\_1BL\_TGACv VWRKALEDSGGWMERTTVDMDAVRAHLKGWKFLYLNDVBECCELPESYEAYRQOHRWISGPMQLFRICFVDITRSK 490  
TRIAE\_CS42\_1AL\_TGACv VWRKALEDSGGWMERTTVDMDAVRAHLKGWKFLYLNDVBECCELPESYEAYRQOHRWISGPMQLFRICFVDITRSK 490  
TRIAE\_CS42\_3DL\_TGACv VWRKALEDSGGWMERTTVDMDAVRAHLKGWKFLYLNDVBECCELPESYEAYRQOHRWISGPMQLFRICFVDITRSK 492  
TRIAE\_CS42\_3AL\_TGACv VWRKALEDSGGWMERTTVDMDAVRAHLKGWKFLYLNDVBECCELPESYEAYRQOHRWISGPMQLFRICFVDITRSK 494  
TRIAE\_CS42\_1DL\_TGACv VWRKALEDSGGWMERTTVDMDAVRAHLKGWKFLYLNDVBECCELPESYEAYRQOHRWISGPMQLFRICFVDITRSK 485  
TRIAE\_CS42\_1BL\_TGACv VWRKALEDSGGWMERTTVDMDAVRAHLKGWKFLYLNDVBECCELPESYEAYRQOHRWISGPMQLFRICFVDITRSK 451  
TRIAE\_CS42\_5BL\_TGACv VWRKALEDSGGWMERTTVDMDAVRAHLKGWKFLYLNDVBECCELPESYEAYRQOHRWISGPMQLFRICFVDITRSK 495  
TRIAE\_CS42\_5DL\_TGACv VWRKALEDSGGWMERTTVDMDAVRAHLKGWKFLYLNDVBECCELPESYEAYRQOHRWISGPMQLFRICFVDITRSK 493  
TRIAE\_CS42\_5AL\_TGACv VWRKALEDSGGWMERTTVDMDAVRAHLKGWKFLYLNDVBECCELPESYEAYRQOHRWISGPMQLFRICFVDITRSK 487  
TRIAE\_CS42\_3DS\_TGACv VWRKALEDSGGWMERTTVDMDAVRAHLKGWKFLYLNDVBECCELPESYEAYRQOHRWISGPMQLFRICFVDITRSK 523  
TRIAE\_CS42\_3B\_TGACv1 VWRKALEDSGGWMERTTVDMDAVRAHLKGWKFLYLNDVBECCELPESYEAYRQOHRWISGPMQLFRICFVDITRSK 516  
TRIAE\_CS42\_3AS\_TGACv VWRKALEDSGGWMERTTVDMDAVRAHLKGWKFLYLNDVBECCELPESYEAYRQOHRWISGPMQLFRICFVDITRSK 515

TRIAE\_CS42\_1DL\_TGACv TGFWKKCNLIFLFFLLRKLILPFYSFTLFCVILEMTMFVPEABLPAWVVCYIPATMSIMSILPSPKSPFFIVPYLLFENT 570  
TRIAE\_CS42\_1BL\_TGACv TGFWKKCNLIFLFFLLRKLILPFYSFTLFCVILEMTMFVPEABLPAWVVCYIPATMSIMSILPSPKSPFFIVPYLLFENT 570  
TRIAE\_CS42\_1AL\_TGACv TGFWKKCNLIFLFFLLRKLILPFYSFTLFCVILEMTMFVPEABLPAWVVCYIPATMSIMSILPSPKSPFFIVPYLLFENT 570  
TRIAE\_CS42\_3DL\_TGACv TGFWKKCNLIFLFFLLRKLILPFYSFTLFCVILEMTMFVPEABLPAWVVCYIPATMSIMSILPSPKSPFFIVPYLLFENT 572  
TRIAE\_CS42\_3AL\_TGACv TGFWKKCNLIFLFFLLRKLILPFYSFTLFCVILEMTMFVPEABLPAWVVCYIPATMSIMSILPSPKSPFFIVPYLLFENT 574  
TRIAE\_CS42\_1DL\_TGACv TGFWKKCNLIFLFFLLRKLILPFYSFTLFCVILEMTMFVPEABLPAWVVCYIPATMSIMSILPSPKSPFFIVPYLLFENT 565  
TRIAE\_CS42\_1BL\_TGACv TGFWKKCNLIFLFFLLRKLILPFYSFTLFCVILEMTMFVPEABLPAWVVCYIPATMSIMSILPSPKSPFFIVPYLLFENT 531  
TRIAE\_CS42\_5BL\_TGACv TGFWKKCNLIFLFFLLRKLILPFYSFTLFCVILEMTMFVPEABLPAWVVCYIPATMSIMSILPSPKSPFFIVPYLLFENT 575  
TRIAE\_CS42\_5DL\_TGACv TGFWKKCNLIFLFFLLRKLILPFYSFTLFCVILEMTMFVPEABLPAWVVCYIPATMSIMSILPSPKSPFFIVPYLLFENT 573  
TRIAE\_CS42\_5AL\_TGACv TGFWKKCNLIFLFFLLRKLILPFYSFTLFCVILEMTMFVPEABLPAWVVCYIPATMSIMSILPSPKSPFFIVPYLLFENT 567  
TRIAE\_CS42\_3DS\_TGACv TGFWKKCNLIFLFFLLRKLILPFYSFTLFCVILEMTMFVPEABLPAWVVCYIPATMSIMSILPSPKSPFFIVPYLLFENT 603  
TRIAE\_CS42\_3B\_TGACv1 TGFWKKCNLIFLFFLLRKLILPFYSFTLFCVILEMTMFVPEABLPAWVVCYIPATMSIMSILPSPKSPFFIVPYLLFENT 596  
TRIAE\_CS42\_3AS\_TGACv TGFWKKCNLIFLFFLLRKLILPFYSFTLFCVILEMTMFVPEABLPAWVVCYIPATMSIMSILPSPKSPFFIVPYLLFENT 595

TRIAE\_CS42\_1DL\_TGACv MSVTKFNAMISGLFQLGSAYEWWVTTKSGRSGEGDLIAVEKHTVQQQQRVG-----SAPDL 627  
TRIAE\_CS42\_1BL\_TGACv MSVTKFNAMISGLFQLGSAYEWWVTTKSGRSGEGDLIAVEKHTVQQQQRVG-----SAPDL 627  
TRIAE\_CS42\_1AL\_TGACv MSVTKFNAMISGLFQLGSAYEWWVTTKSGRSGEGDLIAVEKHTVQQQQRVG-----SAPDL 627  
TRIAE\_CS42\_3DL\_TGACv MSVTKFNAMISGLFQLGSAYEWWVTTKSGRSGEGDLIAVENEKQSKQLRVG-----SAPNL 629  
TRIAE\_CS42\_3AL\_TGACv MSVTKFNAMISGLFQLGSAYEWWVTTKSGRSGEGDLIAVENEKQSKQLRVG-----SAPNL 629  
TRIAE\_CS42\_1DL\_TGACv MSVTKFNAMISGLFQLGSAYEWWVTTKSGRSGEGDLIAVENEKQSKQLRVG-----SAPNL 615  
TRIAE\_CS42\_1BL\_TGACv MSVTKFNAMISGLFQLGSAYEWWVTTKSGRSGEGDLIAVENEKQSKQLRVG-----SAPNL 581  
TRIAE\_CS42\_5BL\_TGACv MSVTKFNAMISGLFQLGSAYEWWVTTKSGRSGEGDLIAVENEKQSKQLRVG-----SAPNL 637  
TRIAE\_CS42\_5DL\_TGACv MSVTKFNAMISGLFQLGSAYEWWVTTKSGRSGEGDLIAVENEKQSKQLRVG-----SAPNL 634  
TRIAE\_CS42\_5AL\_TGACv MSVTKFNAMISGLFQLGSAYEWWVTTKSGRSGEGDLIAVENEKQSKQLRVG-----SAPNL 629  
TRIAE\_CS42\_3DS\_TGACv MSVTKFNAMISGLFQLGSAYEWWVTTKSGRSGEGDLIAVENEKQSKQLRVG-----SAPNL 683  
TRIAE\_CS42\_3B\_TGACv1 MSVTKFNAMISGLFQLGSAYEWWVTTKSGRSGEGDLIAVENEKQSKQLRVG-----SAPNL 676  
TRIAE\_CS42\_3AS\_TGACv MSVTKFNAMISGLFQLGSAYEWWVTTKSGRSGEGDLIAVENEKQSKQLRVG-----SAPNL 675

TRIAE\_CS42\_1DL\_TGACv AGLAAKSSSLPKKDAPKKQKHNRIRYKELALSLFLLTAAARSVLSAQGHFYFLLFQGVSVFLVGLDLIGQVE 702  
TRIAE\_CS42\_1BL\_TGACv AGLAAKSSSLPKKDAPKKQKHNRIRYKELALSLFLLTAAARSVLSAQGHFYFLLFQGVSVFLVGLDLIGQVE 702



TRIAE\_CS42\_1AL\_TGAcv AGLAAKDSLPPKADAPKKKQKHNRLYRKELALSLFLLTAAARSVLSAQGIHFYFLLFQGVSFLLVGLDLIGEQVE 702  
TRIAE\_CS42\_3DL\_TGAcv DSLAAKEELYPKAEFPKPKKKKHNRLYRKELALSLFLLTAAARSLLSVQGIHFYFLLFQGVSFLLVGLDLIGEQVE 704  
TRIAE\_CS42\_3AL\_TGAcv DSLAAKEELYPKSEF--KKKKHNRLYRKELALSLFLLTAAARSLLSVQGIHFYFLLFQGVSFLLVGLDLIGEQVE 704  
TRIAE\_CS42\_1DL\_TGAcv SVPAINVAIKEQSKAKKESKKNRLYRKELAMSLFLLTAAARSLLSKQGIHFYFLLFQGISFLLVGLDLIGQDIK 690  
TRIAE\_CS42\_1BL\_TGAcv SVPAINVAIKEKLLAKKESKKNRLYRKELAMSLFLLTAAARSLLSKQGIHFYFLLFQGISFLLVGLDLIGQDIK 656  
TRIAE\_CS42\_5BL\_TGAcv LMLVKEQQPSPKKEGKKQKKHNRLYRKELALSLFLLTAAARSLLTKQGIHFYFLLFQGISFLLVGLDLIGEQVE 712  
TRIAE\_CS42\_5DL\_TGAcv LMLVKEQ-PSPKKEGKKQKKHNRLYRKELALSLFLLTAAARSLLTKQGIHFYFLLFQGISFLLVGLDLIGEQVE 708  
TRIAE\_CS42\_5AL\_TGAcv LMLVKEEQASPRKEGKKQ-KKHNRLYRKELALSLFLLTAAARSLLTKQGIHFYFLLFQGISFLLVGLDLIGEQVE 703  
TRIAE\_CS42\_3DS\_TGAcv AQAEVTSLAAAIAKTSKAKPPNRIFKKELALAFLLTAAARSLLSAQGLHFYFLLFQGVTFLLVGLDLIGEQVS 758  
TRIAE\_CS42\_3B\_TGAcv1 AEAEVTSLAAAIAKTSKAKPPNRIFKKELALAFLLTAAARSLLSAQGLHFYFLLFQGVTFLLVGLDLIGEQVS 751  
TRIAE\_CS42\_3AS\_TGAcv AEAEVTSLAAAIAKTSKAKPPNRIFKKELALAFLLTAAARSLLSAQGLHFYFLLFQGVTFLLVGLDLIGEQVS 750

**Fig. S\_2C: *CslD* subfamily.**

| S.No | Gene name with number of splice variants ( <i>CslD</i> ) | No. of amino acids (aa) |
|------|----------------------------------------------------------|-------------------------|
| 1    | TRIAE_CS42_2BS_TGACv1_148683_AA0494520.1                 | 1121 aa                 |
| 2    | TRIAE_CS42_2DS_TGACv1_177279_AA0572180.1                 | 1120 aa                 |
| 3    | TRIAE_CS42_2AS_TGACv1_114244_AA0365360.1                 | 1120 aa                 |
| 4    | TRIAE_CS42_1BL_TGACv1_030586_AA0094860.1                 | 1189 aa                 |
| 5    | TRIAE_CS42_1AL_TGACv1_001700_AA0034150.2                 | 1146 aa                 |
| 6    | TRIAE_CS42_1DL_TGACv1_063091_AA0223780.1                 | 1014 aa                 |
| 7    | TRIAE_CS42_1BS_TGACv1_049706_AA0160220.1                 | 330 aa                  |
| 8    | TRIAE_CS42_5BS_TGACv1_425241_AA1392650.1                 | 1022 aa                 |
| 9    | TRIAE_CS42_5DS_TGACv1_457675_AA1488780.1                 | 989 aa                  |
| 10   | TRIAE_CS42_7BL_TGACv1_577301_AA1871610.1                 | 994 aa                  |
| 11   | TRIAE_CS42_7AL_TGACv1_559436_AA1799630.1                 | 993 aa                  |
| 12   | TRIAE_CS42_7DL_TGACv1_603510_AA1985050.1                 | 994 aa                  |

TRIAE\_CS42\_1BL\_TGACv -----MGSKGILKNSGSSRMPHPGSPKPTAPTSAPOVVFGRRTESGRFISYSRDDLDS-EISSV 59  
 TRIAE\_CS42\_1DL\_TGACv -----MGSKGILKNSGSSRVPHPGSPKPTAPTSAPOVVFGRRTESGRFISYSRDDLDS-EISSV 59  
 TRIAE\_CS42\_1AL\_TGACv -----MGSKGILKNSGSSRVPHPGSPKPTAPTSAPOVVFGRRTESGRFISYSRDDLDS-EISSV 59  
 TRIAE\_CS42\_2DS\_TGACv -----MSKAPRNPGGGSAGAPKSSSGQPVKFAFRTPSGRYLSLSREDIDMEGEMGP 51  
 TRIAE\_CS42\_2AS\_TGACv -----MSKAPRNPGGGSAGAPKSSSGQPVKFAFRTPSGRYLSLSREDIDMEGEMGP 51  
 TRIAE\_CS42\_2BS\_TGACv -----MSKAPRNPGGGSAGAPKSSSGQPVKFAFRTPSGRYLSLSREDIDMEGEMGP 51  
 TRIAE\_CS42\_7BL\_TGACv -----MSKAPRNPGGGSAGAPKSSSGQPVKFAFRTPSGRYLSLSREDIDMEGEMGP 51  
 TRIAE\_CS42\_7DL\_TGACv -----MAS 3  
 TRIAE\_CS42\_7AL\_TGACv -----MAS 3  
 TRIAE\_CS42\_1BS\_TGACv -----MAS 3  
 TRIAE\_CS42\_5BS\_TGACv MSRRLSLPAGSPVTVTVSPTKGGKAGGGSPGDGVVRRSGSLTSPVPRHSIGSSSTATLQVSPVRRSGGSRYASRDGADASA 80  
 TRIAE\_CS42\_5DS\_TGACv MSRRLSLPASSPVTVTVSPTKGGKAGGGSPGDGVVRRSGSLTSPVPRHSIGSSSTATLQVSPVRRSGGSRYASRDGADASA 80

TRIAE\_CS42\_1BL\_TGACv DFQDYHVHVPMTDPNQPMEE-----GKKADEQYVSSSLFTGGFNSVTRAHVMD--KQGPDSIDGRSGPKSICMVEGC 131  
 TRIAE\_CS42\_1DL\_TGACv DFQDYHVHVPMTDPNQPMEE-----GKKADEQYVSSSLFTGGFNSVTRAHVMD--KQGPDSIDGRSGPKSICMVEGC 131  
 TRIAE\_CS42\_1AL\_TGACv DFQDYHVHVPMTDPNQPMEE-----GKKADEQYVSSSLFTGGFNSVTRAHVMD--KQGPDSIDGRSGPKSICMVEGC 131  
 TRIAE\_CS42\_2DS\_TGACv DYANYTVHIPPTPDNQPMKDGAEPTAVAMKAEQYVNSLFTGGFNSVTRAHLMDRVIDSDVKHPQMAGARPARCAMPAC 131  
 TRIAE\_CS42\_2AS\_TGACv DYANYTVHIPPTPDNQPMKDGAEPTAVAMKAEQYVNSLFTGGFNSVTRAHLMDRVIDSDVKHPQMAGARPARCAMPAC 131  
 TRIAE\_CS42\_2BS\_TGACv DYANYTVHIPPTPDNQPMKDGSEPTAVAMKAEQYVNSLFTGGFNSVTRAHLMDRVIDSDVKHPQMAGAKATRCAMPAC 131  
 TRIAE\_CS42\_7BL\_TGACv DHTNYTVFMPPTPDNQPGAAPAPASGGSTKPDNLPLP--RYTSGSKLVNRRSGDDGAGGAKMDRGLS----- 69  
 TRIAE\_CS42\_7DL\_TGACv DHTNYTVFMPPTPDNQPGAAPTASGGSTKPDNLPLP--RYTSGSKLVNRRSGDDGAGGAKMDRGLS----- 69  
 TRIAE\_CS42\_7AL\_TGACv DHTNYTVFMPPTPDNQPGAASAPASGGPTKPDNLPLP--RSS-GSKLVNRRSGDDGAGGAKMDRRLS----- 68  
 TRIAE\_CS42\_1BS\_TGACv -----MCKMRGC 8  
 TRIAE\_CS42\_5BS\_TGACv EFVHYTVHIPPTDRRTASASTDVAEEEEGEVLPQRSYVSGTIFTGGLNCAHRAHVLNSADGARPAASANMCKMRGC 160  
 TRIAE\_CS42\_5DS\_TGACv EFVHYTVHIPPTDRNTASASTDAPVAEEEEGEVLPQRSYVSGTIFTGGLNCTTRAHVLNSADGARPAASVNMCKMRGC 160

TRIAE\_CS42\_1BL\_TGACv DSKIMRNRGRGEDIIPCECDFKICVDCFTDAVKGGGGVC PGCKELYKHTEWEVLSNSSNELTRALSHPHGPGKMERRLS 211  
 TRIAE\_CS42\_1DL\_TGACv DSKIMRNRGRGEDIIPCECDFKICVDCFTDAVKGGRGVC PGCKELYKHTEWEVLSNSSNELTRALSHPHGPGKMERRLS 211  
 TRIAE\_CS42\_1AL\_TGACv DSKIMRNRGRGEDIIPCECDFKICVDCFTDAVKGGGGVC PGCKELYKHTEWEVLSNSSNELTRALSHPHGPGKMERRLS 211  
 TRIAE\_CS42\_2DS\_TGACv DGKVMRNERGEEIEPCECRFKICRDCYLAQKDGCLCPG-----CKEHYKIGDYADDDTHDVS 189  
 TRIAE\_CS42\_2AS\_TGACv DGKVMRNERGEEIEPCECRFKICRDCYLAQKDGCLCPG-----CKEHYKIGDYADDDPHDVS 189  
 TRIAE\_CS42\_2BS\_TGACv DGKVMRNERGEEVDPCECRFKICRDCYLAQKDGCLCPG-----CKEHYKIGDYADDDPHDVS 189  
 TRIAE\_CS42\_7BL\_TGACv -----TEHVAS 75  
 TRIAE\_CS42\_7DL\_TGACv -----TEQVAS 75  
 TRIAE\_CS42\_7AL\_TGACv -----PVQVAS 74  
 TRIAE\_CS42\_1BS\_TGACv DMLALAATRP-----MICEECYMDCAVAGNCPGCKEAYSAGSDTDDSVDEDDDDAIISSSEERDQMPMTSMSKRF 78  
 TRIAE\_CS42\_5BS\_TGACv DMPAFLNAGRGGHPCCDCGFMICEECYMDCAVAGNCPGCKEAYSAGSDTDDSVDEDDDDAIISSSEERDQMPMTSMSKRF 240  
 TRIAE\_CS42\_5DS\_TGACv DMPAFLNAGRGRPPCCDCGFMICEECYMDCAVAGNCPGCKEAYSAGSDTDDSVDEDDDDAIISSSEERDQMPMTSMSKRF 240

TRIAE\_CS42\_1BL\_TGACv LVKQGTMMNQ-----GEFDHNRWLFETKGTGYGNALWED-----DNVDDDGRNCGVPGHPKE LMSKFWRLPT 274  
 TRIAE\_CS42\_1DL\_TGACv LVKQGTMMNQ-----GEFDHNRWLFETKGTGYGNALWED-----DNVDDDGRNCGVPGHPKE LMSKFWRLPT 274  
 TRIAE\_CS42\_1AL\_TGACv LVKQGTMMNQ-----GEFDHNRWLFETKGTGYGNALWED-----DNVDDDGRNCGVPGHPKE LMSKFWRLPT 274  
 TRIAE\_CS42\_2DS\_TGACv AGKSLLRNQN-----GEFDHNRWLFESSGTGYGNALWFKG--GMYE DLDEDGAGGDD-GMQD MNQKFFKPLT 256  
 TRIAE\_CS42\_2AS\_TGACv SGKSLLRNQN-----GEFDHNRWLFESSGTGYGNALWFKG--GMYE DLDEDGAGGDD-GMQD MNQKFFKPLT 256  
 TRIAE\_CS42\_2BS\_TGACv AGKSLLRNQN-----GEFDHNRWLFESSGTGYGNALWFKG--GMYE DLDEDGAGGDDGMPADLSQKFFKPLT 257  
 TRIAE\_CS42\_7BL\_TGACv PSKSLLRVRSQT-----GEFDHNRWLFETKGTGYGNALWED-----DNDDGAGMGCGSVKMEDLVDKFWKPLS 139  
 TRIAE\_CS42\_7DL\_TGACv PSKSLLRVRSQT-----GEFDHNRWLFETKGTGYGNALWED-----DNDDGAGMGCGSVKMEDLVDKFWKPLS 139  
 TRIAE\_CS42\_7AL\_TGACv PSKSLLRVRSQT-----GEFDHNRWLFETKGTGYGNALWED-----DNDDGAGMGCGSVKMEDLVDKFWKPLS 138  
 TRIAE\_CS42\_1BS\_TGACv SMVHSIKMPMSSSND---KPADFDHARWLFETKGTGYGNALWEDNEHGGGGNAGATFGFVGIIEEPPNF----- 145  
 TRIAE\_CS42\_5BS\_TGACv SMVHSIKMPMSSSNG---KPADFDHARWLFETKGTGYGNALWEDKNEHGGGGNAGATSGFVGIIEEPPNFARCRRLPT 316  
 TRIAE\_CS42\_5DS\_TGACv SMVHSIKMPMSSSNGGGKPADFDHARWLFETKGTGYGNALWEDKNEHGGGGNAGATSGFVGIIEEPPNFARCRRLPT 320

TRIAE\_CS42\_1BL\_TGACv RKLQIPAAVISPYRLLVLRVALAFLFMWRKIQNDDAIWLWGMISVCELFWAFSWVLDLQPKLCPINRATDLSVLKEK 354  
 TRIAE\_CS42\_1DL\_TGACv RKLQIPAAVISPYRLLVLRVALAFLFMWRKIQNDDAIWLWGMISVCELFWALSVDLQPKLCPINRATDLSVLKEK 354

TRIAE\_CS42\_1AL\_TGAcv RKLQIPAAVISPYRLLVLRVALFFLWMRIKHQNDDAIWLWGMISVCELWFALSWSVLDLQPKLCPINRATDLSVLKEK 354
TRIAE\_CS42\_2DS\_TGAcv RKIPMPASIIISPYRIFIVIRFFVLIFFLITWRIRNPNMEALWLWGMISVCELWFASFLLDMLPKVNPINRSTDLAVLKEK 336
TRIAE\_CS42\_2AS\_TGAcv RKIPMPTSIIISPYRIFIVIRFFVLIFFLITWRIRNPNMEALWLWGMISVCELWFASFLLDMLPKVNPINRSTDLAVLKEK 336
TRIAE\_CS42\_2BS\_TGAcv RKIPMPTSIIISPYRIFIVIRFFVLIFFLITWRIRNPNMEALWLWGMISVCELWFASFLLDMLPKVNPINRSTDLAVLKEK 337
TRIAE\_CS42\_7BL\_TGAcv RKVAIPPGILSPYRLLVLRVRFVLFLLIWRATNPNDAMWLWGISVCEYWFALSWSVLDLQPKLCPINRATDLSVLKEK 219
TRIAE\_CS42\_7DL\_TGAcv RKVAIPPGILSPYRLLVLRVRFVLFLLIWRATNPNDAMWLWGISVCEYWFALSWSVLDLQPKLCPINRATDLSVLKEK 219
TRIAE\_CS42\_7AL\_TGAcv RKVAIPPGILSPYRLLVLRVRFVLFLLIWRATNPNDAMWLWGISVCEYWFALSWSVLDLQPKLCPINRATDLSVLKEK 218
TRIAE\_CS42\_1BS\_TGAcv ----- 145
TRIAE\_CS42\_5BS\_TGAcv RKTSVSAIILSPYRMLIAIRLVALGFFLAWRIRHPNDAMWLWALSVTCEVWFASFLLDLSLQPKLCPVNRSCDLVLAADR 396
TRIAE\_CS42\_5DS\_TGAcv RKTSVSAIILSPYRMLIAIRLVALGFFLAWRIRHPNDAMWLWALSVTCEVWFASFLLDLSLQPKLCPVNRSCDLVLAADR 400
TRIAE\_CS42\_1BL\_TGAcv FETPTPSNPTGKSDPLGIDIFVSTADPEKEPVLVTANTILSILAVDYPVDKLACYSVDDGGALLTFEAMAEASAFANFWV 434
TRIAE\_CS42\_1DL\_TGAcv FETPTPSNPTGKSDPLGIDIFVSTADPEKEPVLVTANTILSILAVDYPVDKLACYSVDDGGALLTFEAMAEASAFANFWV 434
TRIAE\_CS42\_1AL\_TGAcv FETPTPSNPTGKSDPLGIDIFVSTADPEKEPVLVTANTILSILAVDYPVDKLACYSVDDGGALLTFEAMAEASAFANFWV 434
TRIAE\_CS42\_2DS\_TGAcv FETPTSPNPHGRSDPLGLDVFVSTADPEKEPVLVTANTILSILAVDYPVEKLACYSVDDGGALLTFEAMAEASAFANFWV 416
TRIAE\_CS42\_2AS\_TGAcv FETPTSPNPHGRSDPLGLDIFVSTADPEKEPVLVTANTILSILAVDYPVEKLACYSVDDGGALLTFEAMAEASAFANFWV 416
TRIAE\_CS42\_2BS\_TGAcv FETPTSPNPHGRSDPLGLDVFVSTADPEKEPVLVTANTILSILAVDYPVEKLACYSVDDGGALLTFEAMAEASAFANFWV 417
TRIAE\_CS42\_7BL\_TGAcv FESKTPSNPTGRSDPLGLDVFISTADPYKEPPLVTANTLLSILATDYPVEKLFVYISDDGGALLTFEAMAEACAYAKVWV 299
TRIAE\_CS42\_7DL\_TGAcv FESKTPSNPTGRSDPLGLDVFISTADPYKEPPLVTANTLLSILATDYPVEKLFVYISDDGGALLTFEAMAEACAYAKVWV 299
TRIAE\_CS42\_7AL\_TGAcv FESKTPSNPTGRSDPLGLDVFISTADPYKEPPLVTANTLLSILATDYPVEKLFVYISDDGGALLTFEAMAEACAYAKVWV 298
TRIAE\_CS42\_1BS\_TGAcv ----- 145
TRIAE\_CS42\_5BS\_TGAcv FELPTARNPKGRSDPLGLDVFVSTADPEKEPPLVTANTILSILAADYPVEKLACYSVDDGGALLTFEALAEATASFARTWV 476
TRIAE\_CS42\_5DS\_TGAcv FELPTARNPKGRSDPLGLDVFVSTADPEKEPPLVTANTILSILAADYPVEKLACYSVDDGGALLTFEALAEATASFARTWV 480
TRIAE\_CS42\_1BL\_TGAcv PFCRKHDI EPRNPD SYFNLKRDPFKNKVKAD FVKDRRIKREYDEFKVRVNGLPDSIRRRSDAYHAREEIQAMNLQREKI 514
TRIAE\_CS42\_1DL\_TGAcv PFCRKHDI EPRNPD SYFNLKRDPFKNKVKAD FVKDRRIKREYDEFKVRVNGLPDSIRRRSDAYHAREEIQAMNLQREKI 514
TRIAE\_CS42\_1AL\_TGAcv PFCRKHDI EPRNPD SYFNLKRDPFKNKVKAD FVKDRRIKREYDEFKVRVNGLPDSIRRRSDAYHAREEIQAMNLQREKI 514
TRIAE\_CS42\_2DS\_TGAcv PFCRKHDI EPRNPD SYFALKGDPFKGKRSD FVKDRRKVKREYDEFKVRINGLPDSIRRRSDAFNAREDMKML----KHL 492
TRIAE\_CS42\_2AS\_TGAcv PFCRKHDI EPRNPD SYFALKGDPFKGKRSD FVKDRRKVKREYDEFKVRINGLPDSIRRRSDAFNAREDMKML----KHL 492
TRIAE\_CS42\_2BS\_TGAcv PFCRKHDI EPRNPD SYFALKGDPFKGKRSD FVKDRRKVKREYDEFKVRINGLPDSIRRRSDAFNAREDMKML----KHL 493
TRIAE\_CS42\_7BL\_TGAcv PFCRKHDI EPRNPEAYFTQKGDPTKGGKRPDFVKDRRWIKREYDEYKVRINDLPEAIKRRAKAMNAHERKTIAR----ETA 375
TRIAE\_CS42\_7DL\_TGAcv PFCRKHDI EPRNPEAYFTQKGDPTKGGKRPDFVKDRRWIKREYDEYKVRINDLPEAIKRRAKAMNAHERKTIAR----ETA 375
TRIAE\_CS42\_7AL\_TGAcv PFCRKHDI EPRNPEAYFTQKGDPTKGGKRPDFVKDRRWIKREYDEYKVRINDLPEAIKRRAKAMNAHERKTIAR----ETA 374
TRIAE\_CS42\_1BS\_TGAcv ----- 145
TRIAE\_CS42\_5BS\_TGAcv PFCRKHGVEPRCPESYFGQKRD FLNKVRVLD FVRERRKVKREYDEFKVRVNSL TEAIRRRSDAYNAGEELRARRRLOEEA 556
TRIAE\_CS42\_5DS\_TGAcv PFCRKHGVEPRCPESYFGQKRD FLNKVRVLD FVRERRKVKREYDEFKVRVNSL TEAIRRRSDAYNAGEELRARRRLOEEA 560
TRIAE\_CS42\_1BL\_TGAcv KAGGDEQFEPV----KIPKATWMA DSHHPGCTWV HSSQDIARGDHAG TIQVMLKPPSDMPMYG--NIEK-SPLDFSEVDT 587
TRIAE\_CS42\_1DL\_TGAcv KAGGDEQFEPV----KIPKATWMA DSHHPGCTWV HSSQDIARGDHAG TIQVMLKPPSDMPMYG--NIEK-SPLDFSEVDT 587
TRIAE\_CS42\_1AL\_TGAcv KAGGDEQFEPV----KIPKATWMA DSHHPGCTWV HSSQDIARGDHAG TIQVMLKPPSDMPMYG--NIEK-SPLDFSEVDT 587
TRIAE\_CS42\_2DS\_TGAcv RETGADPSEQP----KVKKATWMA DSHHPGCTWV VSSDIAKGNHAG TIQVMLRPPSPDPLYG--MHDEDQLIDYSDVDT 566
TRIAE\_CS42\_2AS\_TGAcv RETGADPSEQP----KVKKATWMA DSHHPGCTWV VSSDIAKGNHAG TIQVMLRPPSPDPLYG--MHDEDQLIDYSDVDT 566
TRIAE\_CS42\_2BS\_TGAcv RETGADPSEQP----KVKKATWMA DSHHPGCTWV VSSDIAKGNHAG TIQVMLRPPSPDPLYG--MHDEDQLIDYSDVDT 567
TRIAE\_CS42\_7BL\_TGAcv AAS----SDAAP----PPVKATWMA DSHHPGCTWV DSAFDIGKGDHAS TIQVMIKNPHHDVVYG--DADDHAYLDFTNVDV 446
TRIAE\_CS42\_7DL\_TGAcv AAS----SDAAP----PPVKATWMA DSHHPGCTWV DSAFDIGKGDHAS TIQVMIKNPHHDVVYG--DADDHAYLDFTNVDV 446
TRIAE\_CS42\_7AL\_TGAcv AAS----SDAAP----PPVKATWMA DSHHPGCTWV DSAFDIGKGDHAS TIQVMIKNPHHDVVYG--DADDHAYLDFTNVDV 445
TRIAE\_CS42\_1BS\_TGAcv -----ATWMSDGSOWASTWAGATDIARGNHAG TIQ----- 176
TRIAE\_CS42\_5BS\_TGAcv VAAGGALGTAPLAETGAVKATWMS DSGSOMPCTWV TGATDIARGNHAG TIQAMLAPPTSEPVLGGEPAESGALIDTTGVDI 636
TRIAE\_CS42\_5DS\_TGAcv VAAGGALGAAPLAETGAVKATWMS DSGSOMPCTWV TGATDIARGNHAG TIQAMLAPPTSEPVLGGEPAESGALIDTTGVDI 640
TRIAE\_CS42\_1BL\_TGAcv RLPMLVYMSREK RPYDHNKKAGAMNALVRSASVMSNGPFLN DCDHYVYNSKAFREGMCFMMDRGDRICYVQFPQRF 667
TRIAE\_CS42\_1DL\_TGAcv RLPMLVYMSREK RPYDHNKKAGAMNALVRSASVMSNGPFLN DCDHYVYNSKAFREGMCFMMDRGDRICYVQFPQRF 667
TRIAE\_CS42\_1AL\_TGAcv RLPMLVYMSREK RPYDHNKKAGAMNALVRSASVMSNGPFLN DCDHYVYNSKAFREGMCFMMDRGDRICYVQFPQRF 667
TRIAE\_CS42\_2DS\_TGAcv RLPMLVYMSREK RPYDHNKKAGAMNALVRSASVMSNAPFLN DCDHYINNNQAVREAMCFMMDRGGERICYVQFPQRF 646
TRIAE\_CS42\_2AS\_TGAcv RLPMLVYMSREK RPYDHNKKAGAMNALVRSASVMSNAPFLN DCDHYINNNQAVREAMCFMMDRGGERICYVQFPQRF 646
TRIAE\_CS42\_2BS\_TGAcv RLPMLVYMSREK RPYDHNKKAGAMNALVRSASVMSNAPFLN DCDHYINNNQAVREAMCFMMDRGGERICYVQFPQRF 647
TRIAE\_CS42\_7BL\_TGAcv RIPMFVYLSREK RPYDHNKKAGAMNALVRSASVMSNGPFLN DCDHYVYNSKAFREGMCFMMDRGDRICYVQFPQRF 526
TRIAE\_CS42\_7DL\_TGAcv RIPMFVYLSREK RPYDHNKKAGAMNALVRSASVMSNGPFLN DCDHYVYNSKAFREGMCFMMDRGDRICYVQFPQRF 526
TRIAE\_CS42\_7AL\_TGAcv RIPMFVYLSREK RPYDHNKKAGAMNALVRSASVMSNGPFLN DCDHYVYNSKAFREGMCFMMDRGDRICYVQFPQRF 525
TRIAE\_CS42\_1BS\_TGAcv -----RPYDHNKKAGAMNALVRSASVMSNGPFLN DCDHYVYNSKAFREGMCFMMDRGDRICYVQFPQRF 244
TRIAE\_CS42\_5BS\_TGAcv RLPMLVYMSREK RPYDHNKKAGAMNALVRSASVMSNGPFLN DCDHYVYNSKAFREGMCFMMDRGDRICYVQFPQRF 716
TRIAE\_CS42\_5DS\_TGAcv RLPMLVYMSREK RPYDHNKKAGAMNALVRSASVMSNGPFLN DCDHYVYNSKAFREGMCFMMDRGDRICYVQFPQRF 720
TRIAE\_CS42\_1BL\_TGAcv EGIDPDSDRYANHNWVFDIMNRALDGLQGPVYVGTGCFRRRITALLYGDP PPRSKDHS PGFCGCCLPRRRKASASANPEET 747
TRIAE\_CS42\_1DL\_TGAcv EGIDPDSDRYANHNWVFDIMNRALDGLQGPVYVGTGCFRRRITALLYGDP PPRSKDHS PGFCGCCLPRRRKASASANPEET 747
TRIAE\_CS42\_1AL\_TGAcv EGIDPDSDRYANHNWVFDIMNRALDGLQGPVYVGTGCFRRRITALLYGDP PPRSKDHS PGFCGCCLPRRRKASASANPEET 747
TRIAE\_CS42\_2DS\_TGAcv EGIDPDSDRYANHNWVFDIMNRALDGLQGPVYVGTGCFRRRITALLYGDP PPRTAEYTG----WLFKKKKVTNFKDPDSD 720
TRIAE\_CS42\_2AS\_TGAcv EGIDPDSDRYANHNWVFDIMNRALDGLQGPVYVGTGCFRRRITALLYGDP PPRTAEYTG----WLFKKKKVTNFKDPDSD 720
TRIAE\_CS42\_2BS\_TGAcv EGIDPDSDRYANHNWVFDIMNRALDGLQGPVYVGTGCFRRRITALLYGDP PPRTAEYTG----WLFKKKKVTNFKDPDSD 721
TRIAE\_CS42\_7BL\_TGAcv EGIDPDSDRYANHNWVFDIMNRALDGLQGPVYVGTGCFRRRITALLYGDP PPRAVEYHG----LVG-QTRVPIDPHARS 599
TRIAE\_CS42\_7DL\_TGAcv EGIDPDSDRYANHNWVFDIMNRALDGLQGPVYVGTGCFRRRITALLYGDP PPRAVEYHG----LVG-QTRVPIDPHARS 599
TRIAE\_CS42\_7AL\_TGAcv EGIDPDSDRYANHNWVFDIMNRALDGLQGPVYVGTGCFRRRITALLYGDP PPRAVEYHG----LVG-QTRVPIDPHARS 598
TRIAE\_CS42\_1BS\_TGAcv EGIDPDSDRYANHNWVFDIMNRALDGLQGPVYVGTGCFRRRITALLYGDP PPRATEHHGWLGRKKIKLFLRKPMTGKKTRE 322
TRIAE\_CS42\_5BS\_TGAcv EGIDPDSDRYANHNWVFDIMNRALDGLQGPVYVGTGCFRRRITALLYGDP PPRATEHHGWLGRKKIKLFLRKPMTGKKTRE 796
TRIAE\_CS42\_5DS\_TGAcv EGIDPDSDRYANHNWVFDIMNRALDGLQGPVYVGTGCFRRRITALLYGDP PPRATEHHGWLGRKKIKLFLRKPMTGKKTRE 800
TRIAE\_CS42\_1BL\_TGAcv MALRMGDFDGDSD-----MNLATFPKFGNSSFLIDSI PVAEFQGRPLADHPSVKNGRPPGALTIPREILDASIVAE 818
TRIAE\_CS42\_1DL\_TGAcv MALRMGDFDGDSD-----MNLATFPKFGNSSFLIDSI PVAEFQGRPLADHPSVKNGRPPGALTIPREILDASIVAE 818
TRIAE\_CS42\_1AL\_TGAcv MALRMGDFDGDSD-----MNLATFPKFGNSSFLIDSI PVAEFQGRPLADHPSVKNGRPPGALTIPREILDASIVAE 818
TRIAE\_CS42\_2DS\_TGAcv TQQLKAEDFDAE-----LTAQLVPRRFGNSSAMLASIPIAEFQARPIADHFAVLHGRPPGTLVPRPPLDPTVAE 791
TRIAE\_CS42\_2AS\_TGAcv TQQLKAEDFDAE-----LTAQLVPRRFGNSSAMLASIPIAEFQARPIADHFAVLHGRPPGTLVPRPPLDPTVAE 791

TRIAE\_CS42\_2BS\_TGACv TQQLKAEDFDAE-----LTAQLVPRRFGNSSAMLASIPAEFQARPIADHFAVLHGRPPGTLTVPRPPLDPPPTVAE 792  
TRIAE\_CS42\_7BL\_TGACv DGVADLRLPLSD-----HPDHEAPQRFGKSKMFIESTAIAVEYQGRPLADHPSVRNGRPAGALLMPRPLDAATVAE 670  
TRIAE\_CS42\_7DL\_TGACv DGIADLRLPLSD-----HPDHEAPQRFGKSKMFIESTAIAVEYQGRPLADHPSVRNGRPAGALLMPRPLDAATVAE 670  
TRIAE\_CS42\_7AL\_TGACv DGVADLRLPLSD-----HPDHEAPQRFGKSKMFIESTAIAVEYQGRPLADHPSVRNGRPAGALLMPRPLDAATVAE 669  
TRIAE\_CS42\_1BS\_TGACv LVMAILQK----- 330  
TRIAE\_CS42\_5BS\_TGACv SEHESMLPPIEDDDHNLQDGVGRDLLLLPQQRTRVHRPADEAPAARGLLQRGHVPVHLVPHRLLRAPGRPLHRQVHRPA 876  
TRIAE\_CS42\_5DS\_TGACv SEHESMLPPIEDDDHNLQDIESSALMPKRFSSATFVSSIPVAEYQGRLLQDMPGVHQGRPAGALAVPREPLDAATVGE 880

TRIAE\_CS42\_1BL\_TGACv AISVVSCWYEEKTEWGRVTRVWGIYGSVTEVVVTGYRMHNRGWKSVYCVTQRDAFRGTAPINLTDRLRQVLRWATGSVEIFF 898  
TRIAE\_CS42\_1DL\_TGACv AISVVSCWYEEKTEWGRVTRVWGIYGSVTEVVVTGYRMHNRGWKSVYCVTQRDAFRGTAPINLTDRLRQVLRWATGSVEIFF 898  
TRIAE\_CS42\_1AL\_TGACv AISVVSCWYEEKTEWGRVTRVWGIYGSVTEVVVTGYRMHNRGWKSVYCVTQRDAFRGTAPINLTDRLRQVLRWATGSVEIFF 898  
TRIAE\_CS42\_2DS\_TGACv AVSVISCWYEDKTEWGRVTRVWGIYGSVTEVVVTGYRMHNRGWRSVYVWISKRDAFLGTAPINMTDRLRQVLRWATGSVEIFF 871  
TRIAE\_CS42\_2AS\_TGACv AVSVISCWYEDKTEWGRVTRVWGIYGSVTEVVVTGYRMHNRGWRSVYVWISKRDAFLGTAPINMTDRLRQVLRWATGSVEIFF 871  
TRIAE\_CS42\_2BS\_TGACv AVSVISCWYEDKTEWGRVTRVWGIYGSVTEVVVTGYRMHNRGWRSVYVWISKRDAFLGTAPINMTDRLRQVLRWATGSVEIFF 872  
TRIAE\_CS42\_7BL\_TGACv AVSVISCWYEDNTEWGLRVWGIYGSVTEVVVTGYRMHNRGWRSVYVWISKRDAFRGTAPINLTDRLRQVLRWATGSVEIFF 750  
TRIAE\_CS42\_7DL\_TGACv AVSVISCWYEDNTEWGLRVWGIYGSVTEVVVTGYRMNRGWRSVYVWISKRDAFRGTAPINLTDRLRQVLRWATGSVEIFF 750  
TRIAE\_CS42\_7AL\_TGACv AVSVISCWYEDNTEWGLRVWGIYGSVTEVVVTGYRMHNRGWRSVYVWISKRDAFRGTAPINLTDRLRQVLRWATGSVEIFF 749  
TRIAE\_CS42\_1BS\_TGACv ----- 330  
TRIAE\_CS42\_5BS\_TGACv PERHVPRLPAAHHHHAVPAGAAGQVVRDHAARVVAQRAVLGDRRHQRAPCGAAGPPQGDRRRGLLHAHVQAGRRRR 956  
TRIAE\_CS42\_5DS\_TGACv AISVICFYEEKTEWGRRIWGIYGSVTEVVVTGYRMHNRGWRSVYCVTRRDAFRGTAPINLTDRLRQVLRWATGSVEIFF 960

TRIAE\_CS42\_1BL\_TGACv SRNNALFASSKMKVLQRIAYLNVGIYPFTSIFLIVYCFPLPALSLSFGQFIVQTLNVTFITYLLIITITLCLLAMLEIKWS 978  
TRIAE\_CS42\_1DL\_TGACv SRNNALFASSKMKVLQRIAYLNVGIYPFTSIFLIVYCFPLPALSLSFGQFIVQTLNVTFITYLLIITITLCLLAMLEIKWS 978  
TRIAE\_CS42\_1AL\_TGACv SRNNALFASSKMKVLQRIAYLNVGIYPFTSIFLIVYCFPLPALSLSFGQFIVQTLNVTFITYLLIITITLCLLAMLEIKWS 978  
TRIAE\_CS42\_2DS\_TGACv SRNNALFASRRLMFLQRYAYLNVGIYPFTSIFLLTYCFIPALSLSFGFFIVQTLNVAFIFYLLITITVTLIALGILEVKWS 951  
TRIAE\_CS42\_2AS\_TGACv SRNNALFASRRLMFLQRYAYLNVGIYPFTSIFLLTYCFIPALSLSFGFFIVQTLNVAFIFYLLITITVTLIALGILEVKWS 951  
TRIAE\_CS42\_2BS\_TGACv SRNNALFASRRLMFLQRYAYLNVGIYPFTSIFLLTYCFIPALSLSFGFFIVQTLNVAFIFYLLITITVTLIALGILEVKWS 952  
TRIAE\_CS42\_7BL\_TGACv SKNNAMLASRRLMFLQRYAYLNVGIYPFTSIFLLTYCFIPALSLSFGQFIVATLDPTFLCYLLITITVTLVLLCILEVKWS 830  
TRIAE\_CS42\_7DL\_TGACv SKNNAMLASRRLMFLQRYAYLNVGIYPFTSIFLLTYCFIPALSLSFGQFIVATLDPTFLCYLLITITVTLVLLCILEVKWS 830  
TRIAE\_CS42\_7AL\_TGACv SKNNAMLASRRLMFLQRYAYLNVGIYPFTSIFLLTYCFIPALSLSFGQFIVATLDPTFLCYLLITITVTLVLLCILEVKWS 829  
TRIAE\_CS42\_1BS\_TGACv ----- 330  
TRIAE\_CS42\_5BS\_TGACv GGGHVVRGAVRGAVELPDGAPRDHDAERGGAGGGDGEDAVQVPAVEQAAGRRLQLLGAVPPLPL----- 1022  
TRIAE\_CS42\_5DS\_TGACv SRNNALFATRRMKLLQRYAYFNVMGMASSR----- 989

TRIAE\_CS42\_1BL\_TGACv GIALEEWRNEQFWLIGGTSAHLAAVMQGLLKVVAGIEISFTLTSKQVGGDDIDDEFAELYEVKWTSLMIPPLTIIMVNLV 1058  
TRIAE\_CS42\_1DL\_TGACv GIALEEWRNEQFWLIGGTSAHLAAVMQGLLKVNSTK----- 1014  
TRIAE\_CS42\_1AL\_TGACv GIALEEWRNEQFWLIGGTSAHLAAVMQGLLKVVAGIEISFTLTSKQVGGDDIDDEFAELYEVKWTSLMIP----- 1048  
TRIAE\_CS42\_2DS\_TGACv GIELEDWRNEQFWLISGISAHLYAVVQGLLKVMAGIEISFTLTAKAAEDNEDIYADLYVVKWSSLLIP----- 1021  
TRIAE\_CS42\_2AS\_TGACv GIELEDWRNEQFWLISGISAHLYAVVQGLLKVMAGIEISFTLTAKAAEDNEDIYADLYVVKWSSLLIP----- 1021  
TRIAE\_CS42\_2BS\_TGACv GIELEDWRNEQFWLISGISAHLYAVVQGLLKVMAGIEISFTLTAKAAEDNEDIYADLYVVKWSSLLIP----- 1022  
TRIAE\_CS42\_7BL\_TGACv GIGLEEWRNEQFWVIGGTSAHLAAVLQGLLKVAAGIEISFTLTAKAAEDDDDFAEYLYIKWTSFLIP----- 900  
TRIAE\_CS42\_7DL\_TGACv GIGLEEWRNEQFWVIGGTSAHLAAVLQGLLKVAAGIEISFTLTAKAAEDDDDFAEYLYIKWTSFLIP----- 900  
TRIAE\_CS42\_7AL\_TGACv GIGLEEWRNEQFWVIGGTSAHLAAVLQGLLKVAAGIEISFTLTAKAAEDDDDFAEYLYIKWTSFLIP----- 899  
TRIAE\_CS42\_1BS\_TGACv ----- 330  
TRIAE\_CS42\_5BS\_TGACv ----- 1022  
TRIAE\_CS42\_5DS\_TGACv ----- 989

TRIAE\_CS42\_1BL\_TGACv AIAVGFSRITYSTIDDEFAELYEVKWTSLMIPPLTIIMVNLVAIAVGFSRITYSTIPQWSKLLGGVFFSFWVLAHLYPF 1138  
TRIAE\_CS42\_1DL\_TGACv ----- 1014  
TRIAE\_CS42\_1AL\_TGACv -----PLTIIMVNLVAIAVGFSRITYSTIPQWSKLLGGVFFSFWVLAHLYPF 1095  
TRIAE\_CS42\_2DS\_TGACv -----PITIGMLNIIAIAFAFARTIYSDNPRWGKFIGGGFFSFWVLAHLNPF 1068  
TRIAE\_CS42\_2AS\_TGACv -----PITIGMLNIIAIAFAFARTIYSENPRWGKFIGGGFFSFWVLAHLNPF 1068  
TRIAE\_CS42\_2BS\_TGACv -----PITIGMLNIIAIAFAFARTIYSDNPRWGKFIGGGFFSFWVLAHLNPF 1069  
TRIAE\_CS42\_7BL\_TGACv -----PLAIIIGINIAMVVGVSRCVYAEIPQYSKLLGGGFFSFWVLAHYYPF 947  
TRIAE\_CS42\_7DL\_TGACv -----PLAIIIGINIAMVVGVSRCVYAEIPQYSKLLGGGFFSFWVLAHYYPF 947  
TRIAE\_CS42\_7AL\_TGACv -----PLAIIIGINIAMVVGVSRCVYAEIPQYSKLLGGGFFSFWVLAHYYPF 946  
TRIAE\_CS42\_1BS\_TGACv ----- 330  
TRIAE\_CS42\_5BS\_TGACv ----- 1022  
TRIAE\_CS42\_5DS\_TGACv ----- 989

TRIAE\_CS42\_1BL\_TGACv AKGLMGRGRTPPIVYVWAGLVISITISLLWIAINPSSAANQQLGGSFSFP- 1189  
TRIAE\_CS42\_1DL\_TGACv ----- 1014  
TRIAE\_CS42\_1AL\_TGACv AKGLMGRGRTPPIVYVWAGLVISITISLLWIAINPSSAANQQLGGSFSFP- 1146  
TRIAE\_CS42\_2DS\_TGACv AKGLMGRGRTPPIVYVWAGLVISITISLLWVALSPEANSTGGARGGGFQFP 1120  
TRIAE\_CS42\_2AS\_TGACv AKGLMGRGRTPPIVYVWAGLVISITISLLWVALSPEANSTGGARGGGFQFP 1120  
TRIAE\_CS42\_2BS\_TGACv AKGLMGRGRTPPIVYVWAGLVISITISLLWVALSPEANSTGGARGGGFQFP 1121  
TRIAE\_CS42\_7BL\_TGACv AKGLMGRGRTPPIVYVWAGLVISITVSLWITISPPDDRVSQSGIEV----- 994  
TRIAE\_CS42\_7DL\_TGACv AKGLMGRGRTPPIVYVWAGLVISITVSLWITISPPDDRVSQSGIEV----- 994  
TRIAE\_CS42\_7AL\_TGACv AKGLMGRGRTPPIVYVWAGLVISITVSLWITISPPDDRVSQSGIEV----- 993  
TRIAE\_CS42\_1BS\_TGACv ----- 330  
TRIAE\_CS42\_5BS\_TGACv ----- 1022  
TRIAE\_CS42\_5DS\_TGACv ----- 989

**Fig. S\_2D: *CsIE* subfamily.**

| S.No | Gene name with number of splice variants ( <i>CsIE</i> ) | No. of amino acids (aa) |
|------|----------------------------------------------------------|-------------------------|
| 1    | TRIAE_CS42_6DL_TGACv1_526558_AA1687090.1                 | 738 aa                  |
| 2    | TRIAE_CS42_6AL_TGACv1_471004_AA1500600.1_3_SPLICE        | 737 aa                  |
| 3    | TRIAE_CS42_6BL_TGACv1_499967_AA1596110.2                 | 736 aa                  |
| 4    | TRIAE_CS42_U_TGACv1_683314_AA2158770.1                   | 446 aa                  |
| 5    | TRIAE_CS42_5DL_TGACv1_433536_AA1415840.1                 | 756 aa                  |
| 6    | TRIAE_CS42_5BL_TGACv1_406235_AA1342610.1                 | 728 aa                  |
| 7    | TRIAE_CS42_5AL_TGACv1_376126_AA1232370.2                 | 728 aa                  |
| 8    | TRIAE_CS42_5DL_TGACv1_433536_AA1415830.1_2_SPLICE        | 728 aa                  |
| 9    | TRIAE_CS42_5BL_TGACv1_406235_AA1342600.1_2_SPLICE        | 734 aa                  |
| 10   | TRIAE_CS42_6DS_TGACv1_543277_AA1737920.1                 | 725 aa                  |

Color Align Conservation results

```

TRIAE_CS42_5DL_TGACv1 MVAIGRRGTQQHGHWRLLAAESPPYLGPRDGEHEAVRDGDSRPGGVQAPRRHGGRILLLLYYRATRVPAAEGRAAWL 80
TRIAE_CS42_5BL_TGACv1 -----MERSRRLFETETHGGRAAYRLHAVTVAAGILLVLYRATHVPAAGEGRATWL 52
TRIAE_CS42_U_TGACv1 ----- 0
TRIAE_CS42_5AL_TGACv1 -----MERTRLFETETHGGRAAYRLHAVTVAAGILLLLYYRATRVPAAEGRAAWL 51
TRIAE_CS42_6DS_TGACv1 -----MERRLFETVRHGGRALYRLHAVTVAASLLVLYRATRVPVSGGRRAAWL 50
TRIAE_CS42_5DL_TGACv1 -----MERTRRLFETETHGGRAAYRLHAVTVAAGILLVLYRATHVPAAGEGRAAWL 52
TRIAE_CS42_5BL_TGACv1 -----MERSRRLFETETHGGRAAYRLHAVTVAAGILLVLYRATRVPAAEGRAAWL 52
TRIAE_CS42_6AL_TGACv1 -----MAGSSVSGGGRRPPLFATEKPKRVLAYRVIYAGTIFAGILLIWFYRATHIPARGSSSLGWR 60
TRIAE_CS42_6BL_TGACv1 -----MAGSSVSGGGRRPPLFATEKPKRVLAYRVIYAGTIFAGILLIWFYRATHIPERGDSSSLGWR 59
TRIAE_CS42_6DL_TGACv1 -----MAGSSVSGGGRRPPLFATEKPKRVLAYRVIYAGTIFAGILLIWFYRATHIPARGSSSLGWR 61

TRIAE_CS42_5DL_TGACv1 G---MLAAELWYAAWVVTQSVRWSVPRRRPFIDRLAARHG-ETLPCVDIFVCTADPYSEPPSLVSTVLSLMAYNYPPE 156
TRIAE_CS42_5BL_TGACv1 G---MLAAELWYAAWVVTQSVRWSVPRRRPFIDRLAARHG-ERLPCVDIFVCTADPYSEPPSLVSTVLSLMAYNYPPE 128
TRIAE_CS42_U_TGACv1 ----- 0
TRIAE_CS42_5AL_TGACv1 G---MLAAELWYAAWVVTQSVRWSVPRRRPFDRDLAARHG-ERLPSVDIFVCTADPYSEPPSLVSTVLSLMAYNYPPE 127
TRIAE_CS42_6DS_TGACv1 G---MLAAELWYAAWVVTQSVRWSVPRRRPFDRDLAARHG-DRLPVDFVCTADPLSEPPSLVSTVLSLMAYNYLAE 126
TRIAE_CS42_5DL_TGACv1 G---MLAAELWYAAWVVTQSVRWSVPRRLLPFIDRLAARYG-ERLPCVDIFVCTADPHSEPPSLVSTVLSLMAYNYPAE 128
TRIAE_CS42_5BL_TGACv1 G---MLAAELCYAAWVVTQSVRWSPLHRRPCRDRLAARYG-ERLPCVDIFVCTADPHSEPPSLVSTVLSLMAYNYPAE 128
TRIAE_CS42_6AL_TGACv1 AGLGLLVAELFLFGLYWVLTLSVRWNPVRRRTFKDRLSERYDDQLPGVDIFVCTADPALEPPMLVISTVLSVMAYDYDPE 140
TRIAE_CS42_6BL_TGACv1 AGLGLLVAELFLFGLYWVLTLSVRWNPVRRRTFKDRLSERYDDQLPGVDIFVCTADPALEPPMLVISTVLSVMAYDYDPE 139
TRIAE_CS42_6DL_TGACv1 AGLGLLVAELFLFGLYWVLTLSVRWNPVRRRTFKDRLSERYDDQLPGVDIFVCTADPALEPPMLVISTVLSVMAYDYDPE 141

TRIAE_CS42_5DL_TGACv1 KLSVYLSDDGGSILTFYGMWEASLFAKHWPFCFKRYNIEPRSPAAYFSES DGHQELCNPKEWSLIKDMFDKMERIDTVV 236
TRIAE_CS42_5BL_TGACv1 KLSVYLSDDGGSILTFYGMWEASLFAKHWPFCFKRYNIEPRSPAAYFSES DGHQELCNPKEWSLIKDMFDKMERIDTAV 208
TRIAE_CS42_U_TGACv1 ----- 0
TRIAE_CS42_5AL_TGACv1 KLSVYLSDDGGSILTFYGMWEASLFAKHWPFCFKRYNIEPRSPAAYFSES DGHQELCNPKEWSLIKDMFDKMERIDTAV 207
TRIAE_CS42_6DS_TGACv1 KLSVYLSDDGGSVLTFFYAMWEASLFAKHWPFCFKRYNIEPRSPAAYFSES --YQDLCTPKWSFIKDMYDEMTERIDTAV 204
TRIAE_CS42_5DL_TGACv1 KLSVYLSDDGGSVLTFFYALWEASLFAKHWPFCFKRYNIEPRSPAAYFSES DGHQDLCPKWSLIREMYDEMTERIDTAV 208
TRIAE_CS42_5BL_TGACv1 KLSVYLSDDGGSILTFYALWEASLFAKHWPFCFKRYNIEPRSPAAYFSES DGHQDMCTPKWSLIREMYDEMTERIDTAA 208
TRIAE_CS42_6AL_TGACv1 KLNLYLSDDAGSAVTFYALHEASEFAKHWPFCFKNYKVEPRSPAAYFAEGATPHDACSPOELLRMKELYKDLTDRVNSVV 220
TRIAE_CS42_6BL_TGACv1 KLNLYLSDDAGSAVTFYALHEASEFAKHWPFCFKNYKVEPRSPAAYFAEGATPHDACSPOELLRMKELYKDLTDRVNSVV 219
TRIAE_CS42_6DL_TGACv1 KLNLYLSDDAGSAVTFYALHEASEFAKHWPFCFKNYKVEPRSPAAYFAEGATPHDACSPOEFLRMKELYKDLTDRMNSVV 221

TRIAE_CS42_5DL_TGACv1 MSGKVPEEIKASHKGFYEWNQEITSKNHQPIVQILIDGKQNAV DNEGKVLPTLVYMAREKRPQHNNFKAGAMNALTRV 316
TRIAE_CS42_5BL_TGACv1 MSGKVPEEIKARHKGFYEWNQEISSKNHQPIVQILIDGKQNAV DNEGKVLPTLVYMAREKRPQHNNFKAGAMNALTRV 288
TRIAE_CS42_U_TGACv1 -----MQITRV 5
TRIAE_CS42_5AL_TGACv1 MSGKVPEEIKARQKGFHEWNEQEITSKNHQPIVQILIDGKQNAV DNEGKVLPTLVYMAREKRPQHNNFKAGAMNALTRV 287
TRIAE_CS42_6DS_TGACv1 ISRKIPPEIRSNHKGFYEWNEPITSKNHQPIVQILIDGKQKGV DSEGNVPTLVYMAREKRPQHNNFKAGAMNALTRV 284
TRIAE_CS42_5DL_TGACv1 LSGKISEEVKANHKGFEHWQDQENTSKNHQPIVQILIEGKDKNAN DDEGNVPTLVYMAREKRPQHNNFKAGAMNALTRV 288
TRIAE_CS42_5BL_TGACv1 LSGKISEEVKENHKGFEHWQDQENTSKNHQPIVQILIEGKDKNAN DDEGNVPTLVYMAREKRPQHNNFKAGAMNALTRV 288
TRIAE_CS42_6AL_TGACv1 HSGKIPEVPECNHRGSEWNEPITSGDHPSVQVILIDRNKRKA VDV DGNALPKLVYMSREKRPQEQHFFKAGSLNALTRV 300
TRIAE_CS42_6BL_TGACv1 HSGKIPEVPECNHRGFSVWNETITSGDHPSVQVILIDRNKRKA VDV DGNALPKLVYMAREKRPQEQHFFKAGSLNALTRV 299
TRIAE_CS42_6DL_TGACv1 HSGKIPEVPECNHRGFSWNETITSGDHPSVQVILIDRNKRKA VDV DGNALPKLVYMAREKRPQEQHFFKAGSLNALTRV 301

TRIAE_CS42_5DL_TGACv1 SSVISNSPITMNVDCDLYSNNNDARDFALCFFLDEEMGHKIGFVQY PONYNNLSKNNIYGNLSLHVINEVEMGGDLSLGGP 396
TRIAE_CS42_5BL_TGACv1 SSVISNSPITMNVDCDLYSNNNDARDFALCFFLDEEMGHKIGFVQY PONYNNLSKNNIYGNLSLHVINEVEMGGDLSLGGP 368
TRIAE_CS42_U_TGACv1 SSVISNSPITMNVDCDLYSNNNDARDFALCFFLDEEMGHKIGFVQY PONYNNLSKNNIYGNLSLHVINEVEMGGDLSLGGP 85
TRIAE_CS42_5AL_TGACv1 SSVISNSPITMNVDCDLYSNNNDARDFALCFFLDEEMGHKIGFVQY PONYNNLSKNNIYGNLSLHVINEVEMGGDLSLGGP 367
TRIAE_CS42_6DS_TGACv1 SSVISNSPITMNVDCDLYSNNNDARDFALCFFLDEEMGHKIGFVQY PONYNNMTKNNIYGNLSLHVINEVEMGGDLSLGGP 364
TRIAE_CS42_5DL_TGACv1 SSVISNSPITMNVDCDLYSNNNDARDFALCFFLDEEMGHKIGFVQY PONYNNLTNNIYGNLSLHVINEVEMGGDLSLGGP 368
TRIAE_CS42_5BL_TGACv1 SSVISNSPITMNVDCDLYSNNNDARDFALCFFLDEEMGHKIGFVQY PONYNNLTNNIYGNLSLHVINEVEMGGDLSLGGP 368
TRIAE_CS42_6AL_TGACv1 SSVISNSPITMNVDCDLYSNNNDARDFALCFFLDEEMGHKIGFVQY PONYNNVNDIYGNP INNVNDELNDCDLSLGGM 380
TRIAE_CS42_6BL_TGACv1 SSVISNSPITMNVDCDLYSNNNDARDFALCFFLDEEMGHKIGFVQY PONYNNVNDIYGNP INNVNDELNDCDLSLGGM 379

```

TRIAE\_CS42\_6DL\_TGACv **SSVTSNSPVLNVDCDMYSNNS**ESIRDALCFFLDDEEQODLGFVQYQPNEDNVVENDSYGNPINVNFELDNPCLDGWMGM 381

TRIAE\_CS42\_5DL\_TGACv **MYIGTGCFFHREILQCRKRETDYQEDWNAGIKDKLQES-IDETEEKAKSLAACYEHC**TQWAD**EH**GVKYGCVVEDVNTGL 475  
TRIAE\_CS42\_5BL\_TGACv **MYIGTGCFFHREILQCRKRETDYQEDWNAGIKDKLQES-IDETEEKAKSLAACYEHC**TQWGD**EH**GVKYGCVVEDVNTGF 447  
TRIAE\_CS42\_U\_TGACv1 **LYIGTGCFFHREILQCRKRETDYQEDWNAGIKDKLQES-IDETEEKAKSLAACYEHC**TQWGD**EH**GVKYGCAVEDVITGL 164  
TRIAE\_CS42\_5AL\_TGACv **LYIGTGCFFHREILQCRKRETDYQEDWNAGIKDKLQES-IDETEEKAKSLAACYEHC**TQWGD**EH**GVKYGCAVEDVITGL 446  
TRIAE\_CS42\_6DS\_TGACv **LYIGTGCFFHREILQCRKRETDYQEDWNGGKGRICDTSIGEIEEKASLACTCYEHC**TQWGD**EH**GLRYGCFVEDVITGL 444  
TRIAE\_CS42\_5DL\_TGACv **MYVGTGCFFHREILQCRRETDYKREDWNGGKDKTQES-IVIEEKASLAASTYEH**DTQWGD**EH**ICIRYGYFAEDIVTGL 447  
TRIAE\_CS42\_5BL\_TGACv **MYVGTGCFFHREILQCRRETDYKREDWNGGKDKTQES-IVIEEKASLAASTYEH**DTQWGD**EH**ICIRYGYFAEDIVTGL 447  
TRIAE\_CS42\_6AL\_TGACv **QYVGTGCFFHREITLSCQIYSKDYKEDWDRGVGIAENAD---**ELEETS**KSLTCTCYEHN**TPWGI**EK**GVRYGCFLEDVITGL 457  
TRIAE\_CS42\_6BL\_TGACv **QYVGTGCFFHREITLSCQIYSKDYKEDWDRGVGIAENAD---**ELEETS**KSLTCTCYEHN**TPWGI**EK**GVRYGCFLEDVITGL 456  
TRIAE\_CS42\_6DL\_TGACv **QYVGTGCFFHREITLSCQIYSKDYKEDWDRGVGIAENAD---**ELEETS**KSLTCTCYEHN**TPWGI**EK**GVRYGCFLEDVITGL 458

TRIAE\_CS42\_5DL\_TGACv **AHCRGWSVYNNPKRPFPMGCGPTTLAQTILQHKRW**SEGIFSFISLSRYNVFLF**HGRTKLRHOMGYH**YGLWAFNSLAT 555  
TRIAE\_CS42\_5BL\_TGACv **AHCRGWSVYNNPKRPFPMGCGPTTLAQTILQHKRW**SEGIFSFISLSRYNVFLF**HGRTKLRHOMGYH**YGLWAFNSLAT 527  
TRIAE\_CS42\_U\_TGACv1 **AHCRGWSVYNNPKRPFPMGCGPTTLAQTILQHKRW**SEGNSLSIFLSRYNVFLF**HGRTKLRHOMGYH**YGLWAFNSLAT 244  
TRIAE\_CS42\_5AL\_TGACv **AHCRGWSVYNNPKRPFPMGCGPTTLAQTILQHKRW**SEGNSLSIFLSRYNVFLF**HGRTKLRHOMGYH**YGLWAFNSLAT 526  
TRIAE\_CS42\_6DS\_TGACv **AHCRGWSVYNNPKRPFPMGCGPTTLAQTILQHKRW**SEGSFSFISLSRYCFPLF**HGRTKLRHOMGYH**YGLWAFNSLPT 524  
TRIAE\_CS42\_5DL\_TGACv **GHCRGWSVHSNPPRPFALGVAPTTLAQTILQHKRW**SEGSFSFISLSRYCFPMF**HGRTKLRHOMGYH**YGLWAFNSIPT 527  
TRIAE\_CS42\_5BL\_TGACv **GHCRGWSVHSNPPRPFALGVAPTTLAQTILQHKRW**SEGSFSFISLSRYCFPMF**HGRTKLRHOMGYH**YGLWAFNSIPT 527  
TRIAE\_CS42\_6AL\_TGACv **QTCRGRWSVYNNPARKGFLGMAPTSLGQILVQHKRW**SEGFQISLSNYSFLL**HGRIKLRGLQMGYSV**CFWALNSPPT 537  
TRIAE\_CS42\_6BL\_TGACv **QTCRGRWSVYNNPARKGFLGMAPTSLGQILVQHKRW**SEGFQISLSNYSFLL**HGRIKLRGLQMGYSV**CFWALNSPPT 536  
TRIAE\_CS42\_6DL\_TGACv **QTCRGRWSVYNNPARKGFLGMAPTSLGQILVQHKRW**SEGFQMSLSNYSFLL**HGRIKLRGLQMGYSV**CFWALNSPPT 538

TRIAE\_CS42\_5DL\_TGACv **IYYVILPSLAILKGTSLFPBITSPWIAFFVYVFCVKNMYSIYEAL**SSGDT**KGWWNGQRMWLVKRITSYL**FGVLDNIRKL 635  
TRIAE\_CS42\_5BL\_TGACv **IYYVILPSLAILKGTSLFPBITSPWIAFFVYVFCVKNMYSIYEAL**SSGDT**KGWWNGQRMWLVKRITSYL**FGVLDNIRKL 607  
TRIAE\_CS42\_U\_TGACv1 **IYYVILPSLAILKGTSLFPBITSPWIAFFVYVFCVKNMYSIYEAL**SSGDT**KGWWNGQRMWLVKRITSYL**FGVLDNIRKL 324  
TRIAE\_CS42\_5AL\_TGACv **IYYVILPSLAILKGTSLFPBITSPWIAFFVYVFCVKNMYSIYEAL**SSGDT**KGWWNGQRMWLVKRITSYL**FGVLDNIRKL 606  
TRIAE\_CS42\_6DS\_TGACv **IYYVILPSLAILKGTSLFPBITSPWIAFFVYVFCVKNMYSIYEAL**SSGDT**KGWWNGQRMWLVKRITSYL**FGVLDNIRKL 604  
TRIAE\_CS42\_5DL\_TGACv **IYYVILPSLAILKGTSLFPBITSPWMSFFIYVLCVKNMYSIYEAL**SSGDT**KGWWNEQRMWLVKRITSYL**FGVLDNIRKL 607  
TRIAE\_CS42\_5BL\_TGACv **IYYVILPSLAILKGTSLFPBITSPWISFFIYVLCVKNMYSIYEAL**SSGDT**KGWWNEQRMWLVKRITSYL**FGVLDNIRKL 607  
TRIAE\_CS42\_6AL\_TGACv **FYYVILPSLCHLSVSVFPEITSPWCIFFIYVVAVSYSWSIMES**LQCGDT**AVEWNAQRMWLMRRITSYL**LAADITIGGM 617  
TRIAE\_CS42\_6BL\_TGACv **FYYVILPSLCHLSVSVFPEITSPWCIFFIYVVAVSYSWSIMES**LQCGDT**AVEWNAQRMWLMRRITSYL**LAADITIGGM 616  
TRIAE\_CS42\_6DL\_TGACv **FYYVILPSLCHLSVSVFPEITSPWCIFFIYVVAVSYSWSIMES**LQCGDT**AVEWNAQRMWLMRRITSYL**LAADITIGGM 618

TRIAE\_CS42\_5DL\_TGACv **LGLSKMNFVVPKVSDEDESKRYEQEIMFEGSSDPEVVIITATVALLNIVCLLGGISKVMKGGWN-VH**DALFPPQLILCGM 714  
TRIAE\_CS42\_5BL\_TGACv **LGLSKMNFVVPKVSDEDESKRYEQEIMFEGSSDPEVVIITATVALLNIVCLLGGISKVMKGGWN-EH**DALFPPQLILCGM 686  
TRIAE\_CS42\_U\_TGACv1 **LGLSKMNFVVPKVSDEDESKRYEQEIMFEGSSDPEVVIITATVALLNIVCLLGGISKVMKGGWN-NH**DALFPPQLILCGM 404  
TRIAE\_CS42\_5AL\_TGACv **LGLSKMNFVVPKVSDEDESKRYEQEIMFEGSSDPEVVIITATVALLNIVCLLGGISKVMKGGWN-NH**DALFPPQLILCGM 686  
TRIAE\_CS42\_6DS\_TGACv **LGLSKMNFVVPKVSIEDESKRYEQEIMFEGSSDPEVVIITATVALLNIVCLLGGISQIMTGAWN-IH**DAFSPQLILCGM 683  
TRIAE\_CS42\_5DL\_TGACv **LGLSKMNFVVPKVSSEESKRYEQEIMFEGSSAPEVVIITATVALLNIVCLLGGISQIMTGAWN-IH**DAFSPQLILCGM 686  
TRIAE\_CS42\_5BL\_TGACv **LGLSKMNFVVPKVSSEESKRYEQEIMFEGSSAPEVVIITATVALLNIVCLLGGISQIMTGAWN-IH**DAFSPQLILCGM 686  
TRIAE\_CS42\_6AL\_TGACv **LGVSESGELTVKVDQSALERYKKGKMEFCPISGMFVIIITATVALLNIVCLLGGISQIMTGAWN-IH**DAFSPQLILCGM 696  
TRIAE\_CS42\_6BL\_TGACv **LGVSESGELTVKVDQSALERYKKGKMEFCPISGMFVIIITATVALLNIVCLLGGISQIMTGAWN-IH**DAFSPQLILCGM 695  
TRIAE\_CS42\_6DL\_TGACv **LGVSESGELTVKVDQSALERYKKGKMEFCPISGMFVIIITATVALLNIVCLLGGISQIMTGAWN-IH**DAFSPQLILCGM 697

TRIAE\_CS42\_5DL\_TGACv **LVITSIPEYEAFLRKDKGRIFPPVTLASIGFVMLALPAKIV**----- 756  
TRIAE\_CS42\_5BL\_TGACv **LVITSIPEYEAFLRKDKGRIFPPVTLASIGFVMLALPAKIV**----- 728  
TRIAE\_CS42\_U\_TGACv1 **LVITSIPEYEAFLRKDKGRIFPPVTLASIGFVMLALPAKIV**----- 446  
TRIAE\_CS42\_5AL\_TGACv **LVITSIPEYEAFLRKDKGRIFPPVTLASIGFVMLALPAKIV**----- 728  
TRIAE\_CS42\_6DS\_TGACv **LVITNMPYEAFLRNDKCKIPFPVTLASIGFVMLDFVPTIV**----- 725  
TRIAE\_CS42\_5DL\_TGACv **LVITNIPYEAFLRNDKCKIPFPVTLASIGFVMLALVPTIV**----- 728  
TRIAE\_CS42\_5BL\_TGACv **LVITNIPYEAFLRNDKCKIPFPVTLASIGFVMLALVPTIV**----- 734  
TRIAE\_CS42\_6AL\_TGACv **LVVINAPVYEAFLRDRSGSLFPYFVTLVSLCFVSSLCQAII**----- 737  
TRIAE\_CS42\_6BL\_TGACv **LVVINAPVYEAFLRDRSGSLFPYFVTLVSLCFVSSLCQAII**----- 736  
TRIAE\_CS42\_6DL\_TGACv **LVVINAPVYEAFLRDRSGSLFPYFVTLVSLCFVSSLCQAII**----- 738

**Fig. S\_2E: *Cs1F* subfamily.**

| S.No | Gene name with number of splice variants ( <i>Cs1F</i> ) | No. of amino acids (aa) |
|------|----------------------------------------------------------|-------------------------|
| 1    | TRIAE_CS42_2DL_TGACv1_159781_AA0542640.1                 | 845 aa                  |
| 2    | TRIAE_CS42_7BL_TGACv1_580651_AA1914920.1                 | 614 aa                  |
| 3    | TRIAE_CS42_7AL_TGACv1_557532_AA1782680.1                 | 837 aa                  |
| 4    | TRIAE_CS42_7DL_TGACv1_602590_AA1961740.1                 | 835 aa                  |
| 5    | TRIAE_CS42_2AL_TGACv1_094713_AA0301960.1                 | 865 aa                  |
| 6    | TRIAE_CS42_2DL_TGACv1_160109_AA0546890.1                 | 862 aa                  |
| 7    | TRIAE_CS42_2BL_TGACv1_130934_AA0420130.1                 | 663 aa                  |
| 8    | TRIAE_CS42_2DS_TGACv1_178985_AA0603230.1                 | 870 aa                  |
| 9    | TRIAE_CS42_2AS_TGACv1_112790_AA0345230.1                 | 878 aa                  |
| 10   | TRIAE_CS42_2BS_TGACv1_148027_AA0489970.1                 | 877 aa                  |
| 11   | TRIAE_CS42_2AS_TGACv1_113659_AA0359050.1                 | 847 aa                  |
| 12   | TRIAE_CS42_2DS_TGACv1_177641_AA0581710.2_2_SPLICE        | 847 aa                  |
| 13   | TRIAE_CS42_2BS_TGACv1_148608_AA0494060.1                 | 851 aa                  |
| 14   | TRIAE_CS42_U_TGACv1_641498_AA2096480.1                   | 857 aa                  |
| 15   | TRIAE_CS42_2BS_TGACv1_146146_AA0456710.1                 | 754 aa                  |
| 16   | TRIAE_CS42_2DS_TGACv1_179076_AA0604160.1_2_SPLICE        | 783 aa                  |
| 17   | TRIAE_CS42_2AS_TGACv1_112322_AA0335290.1                 | 878 aa                  |
| 18   | TRIAE_CS42_2BS_TGACv1_147667_AA0486240.1_2_SPLICE        | 877 aa                  |
| 19   | TRIAE_CS42_2DS_TGACv1_177329_AA0573830.1                 | 875 aa                  |
| 20   | TRIAE_CS42_2BS_TGACv1_148916_AA0495580.1                 | 701 aa                  |
| 21   | TRIAE_CS42_2DS_TGACv1_178471_AA0596060.1                 | 701 aa                  |
| 22   | TRIAE_CS42_2AS_TGACv1_112322_AA0335280.1                 | 897 aa                  |
| 23   | TRIAE_CS42_5BL_TGACv1_409916_AA1366600.2_2_SPLICE        | 815 aa                  |
| 24   | TRIAE_CS42_5DL_TGACv1_433902_AA1424880.1                 | 808 aa                  |
| 25   | TRIAE_CS42_5AL_TGACv1_374191_AA1193100.1_2_SPLICE        | 807 aa                  |
| 26   | TRIAE_CS42_7BL_TGACv1_577473_AA1876170.1                 | 941 aa                  |
| 27   | TRIAE_CS42_7AL_TGACv1_555973_AA1751470.1                 | 899 aa                  |
| 28   | TRIAE_CS42_7DL_TGACv1_607937_AA2011180.1                 | 498 aa                  |
| 29   | TRIAE_CS42_1BS_TGACv1_049866_AA0163180.1                 | 856 aa                  |

Color Align Conservation results

|                      |                                                                                 |     |
|----------------------|---------------------------------------------------------------------------------|-----|
| TRIAE_CS42_5DL_TGACv | -----MSMTYITKKHDYAATLDEKEP                                                      | 21  |
| TRIAE_CS42_5AL_TGACv | -----MSMTYITKKHDYVASLDGKES                                                      | 21  |
| TRIAE_CS42_5BL_TGACv | -----MSMTYISKKHDYAATLDEKEQ                                                      | 21  |
| TRIAE_CS42_2AS_TGACv | -----MTTSPATHDGAATGLSEPLLPNRNGVHAGALVVTVPVANGHGGDKLKGDLKAKDKYWKVDQPDVVAA        | 69  |
| TRIAE_CS42_2BS_TGACv | -----MTTSPATAAGAATGLSEPLLSNGNGVHAGALVVTVPVANGHGG-DKLKGDLLKAKDKYWKVDQPDVVAA      | 68  |
| TRIAE_CS42_2DS_TGACv | -----MTTSPATDAGAATGLSEPLLSNRNGVHAGALVVTVPVAANGHGG-----KAKDKYWKVDQPDGDMV         | 61  |
| TRIAE_CS42_2AS_TGACv | -----MASAAGAGGANAGLADPLLAS-----AKKPVGAKGKHVVAADK-DQRR                           | 43  |
| TRIAE_CS42_2DS_TGACv | -----MASAAGAGGANAGLADPLLAS-----AKKPVGAKGKHVVAADK-DQRR                           | 43  |
| TRIAE_CS42_2BS_TGACv | -----MASAVGAGGANAGLADPLLASRD-----GGAKKPVGAKGKHVVAADK-DQRR                       | 47  |
| TRIAE_CS42_2DL_TGACv | -----MAAAVTRRSNALRVDPGGEAVAVSVAADSPVAKRGLGAKDDVWVADE                            | 49  |
| TRIAE_CS42_2BL_TGACv | -----                                                                           | 0   |
| TRIAE_CS42_2AL_TGACv | -----MMAAAVTRRSNALRVDPDGDAVAVSVVADSPVAKRGLGAKEDVWVADE                           | 50  |
| TRIAE_CS42_2DL_TGACv | -----MAAAVTRRVNLRVEVPDG-----NADTANAPAAKRILDAKDDVWVSAD                           | 44  |
| TRIAE_CS42_2BS_TGACv | -----MAAAVTRRANALRVEAPDGNTEGRASLAADSPVAKRAVDKDDVWVADEGEA                        | 54  |
| TRIAE_CS42_2DS_TGACv | -----MAAAVTRRANALRAEAPDGNTEGRASLAADSPVAKRAVDKDDVWVADEGDT                        | 54  |
| TRIAE_CS42_7AL_TGACv | -----MPLRVEALVATDTASAAAEGRRAKDDVWVAEEGDM                                        | 36  |
| TRIAE_CS42_7DL_TGACv | -----MALRVEALVATDTAAAEGR--RAKDDVWVAEEGDM                                        | 34  |
| TRIAE_CS42_7BL_TGACv | -----MATDTVADAAEGRRARDVWVAEEGDM                                                 | 28  |
| TRIAE_CS42_U_TGACv1  | -----MPSPAAVGGGRLADPLLAAAD-----VVVGAKDKYWVPADEREILASQK                          | 43  |
| TRIAE_CS42_1BS_TGACv | -----MASPAAGGGGLADPLLATD-----VVVGPKDKYWVPADEREILASHR                            | 43  |
| TRIAE_CS42_2AS_TGACv | -----MVSPATGGGRGNAGLAEPLLATNDSDGAKHVFAGAKHWPVPADEKEMASRE                        | 54  |
| TRIAE_CS42_2BS_TGACv | -----MVSPATSGGRGNAGLADPLLATNDSDGARHVFAGAKYWPVPADEKEMASRE                        | 54  |
| TRIAE_CS42_2DS_TGACv | -----MVSFAASGGGNAGLADPLLATNDNSEGARHVFAGAKYWVPVPADEKEIASRE                       | 52  |
| TRIAE_CS42_2BS_TGACv | -----                                                                           | 0   |
| TRIAE_CS42_2DS_TGACv | -----                                                                           | 0   |
| TRIAE_CS42_2AS_TGACv | ----MGSLAAANGAGHASNGAGVADQALALENGTGNHGKAGVANRATPPLQANGSKVAKKISPDKYVWVADEGEMAAA  | 76  |
| TRIAE_CS42_7AL_TGACv | MAPAVAGGRRVRSNEPAAAAAPAAASGKPCVCGFQVCACTGSAAVASAASSLDMDIVAMQIGAVNDESWVGVELGEDGE | 80  |
| TRIAE_CS42_7DL_TGACv | -----                                                                           | 0   |
| TRIAE_CS42_7BL_TGACv | MAPAVAGGRRVRSNEP----AAAAADKPCVCGFQVCACTGSAAVASAASSLDMDIVAMQIGAVNDESWVGVELGEDGE  | 76  |
| TRIAE_CS42_5DL_TGACv | SEDQKSASVKNLLVRTTKLTTVTIKLYRLMVFVRLTIFVLFKWRVSTALTIVISDGTTRARAMWTMSIAGELWFLMWWL | 101 |
| TRIAE_CS42_5AL_TGACv | PEHEKSASVERLLVRTTKLTTVTIKLYRLVVFVRMIFVLFKWRSTALAMISDGTTRVRAMWTMSIAGELWFLMWWL    | 101 |

TRIAE\_CS42\_5BL\_TGAcv PKDQKSASVESLLVRTTKLTTVTKLYRIMVFRMAIFVLFKWRISTALAMISDGATTVRAMWMTPIAGELWLFALMWVL 101
TRIAE\_CS42\_2AS\_TGAcv APDLENGGRRPLLFNRRVKNIILYPYRVLLIRVIAVILFVGVWRK-----HNNSDVMWFVWMSVADVWFVSLSWLS 142
TRIAE\_CS42\_2BS\_TGAcv APDLENGGRRPLLFNRRVKNIILYPYRVLLIRVIAVILFVGVWRK-----HNNSDVMWFVWMSVADVWFVSLSWLS 141
TRIAE\_CS42\_2DS\_TGAcv APDLENGGRRPLLFNRRVKNIILYPYRVLLIRVIAVILFVGVWRK-----NNNSDVMWFVWISVADVWFVSLSWLS 134
TRIAE\_CS42\_2AS\_TGAcv AKESGGEDGRPLLFRTYKVKGTLLHPYRALIFIRLIAVLLFFVWRK-----HNKSDVMWFVWMSVVGDFVWFGFSWLL 116
TRIAE\_CS42\_2DS\_TGAcv AKESGGEDGRPLLFRTYKVKGTLLHPYRALIFIRLIAVLLFFVWRK-----HNKSDIMWFVWMSVVGDFVWFGFSWLL 116
TRIAE\_CS42\_2BS\_TGAcv AKESGGEGRRPLLFRTYKVKGTLLHPYRALIFIRLIAVLLFFVWRK-----HNKSDIMWFVWMSVVGDFVWFGFSWLL 120
TRIAE\_CS42\_2DL\_TGAcv GGIMSGDGNRPLLFRTMKVKGSILHPYRFLMLVRLVAIVAVFAFFKWHVE-----HKNQDSVWLWTASMTADPWFVWFGFSWLL 122
TRIAE\_CS42\_2BL\_TGAcv ----- 0
TRIAE\_CS42\_2AL\_TGAcv GG-MSGDGNRPLLFRTMKVKGSILHPYRFLMLVRLVAIVAVFAFFKWRME-----HKNHDGVWLWTVSMTADVWVWFGFSWLL 122
TRIAE\_CS42\_2DL\_TGAcv DGTSAGNGNQPLLFRTMKVKGSILHPYRFLMLVRLVAIVAVFAFFAWRLE-----HRNHGDTWLWATSMVADAWVWFGFSWLL 117
TRIAE\_CS42\_2BS\_TGAcv SGSIAGDGNRTPFLFRTFKVKGSILHPYRFLMLVRLVAIVAVFAFFAWRVK-----HKNHDGVWLWATSMVADVWVWFGFSWLL 127
TRIAE\_CS42\_2DS\_TGAcv SGAIAGDGNRPLFRTFKVKGSILHPYRFLMLVRLVAIVAVFAFFAWRVK-----HKNHDGVWLWATSMVADVWVWFGFSWLL 127
TRIAE\_CS42\_7AL\_TGAcv SGASAG---RPLLFRTMKVKGSILHPYRFLMLVRLVAIVAVFAFFAWRVE-----HRNHGDTWLWATSMVADAWVWFGFSWLL 106
TRIAE\_CS42\_7DL\_TGAcv SGASAG---RPLLFRTMKVKGSILHPYRFLMLVRLVAIVAVFAFFAWRVE-----HRNHGDMWLWATSMVADAWVWFGFSWLL 104
TRIAE\_CS42\_7BL\_TGAcv PEASAG---RPLLFRTMKVKGSILHPYRFLMLVRLVAIVAVFAFFAWRVE-----HRNHGDTWLWATSMVADAWVWFGFSWLL 98
TRIAE\_CS42\_U\_TGAcv1 SGAG-EDGRAPLLYRTFRVKGFLINLYRLLTLVRLVAIVAVFAFFAWRMR-----HRSDAMMLLWVIVSVDGLWVFGVTWLL 115
TRIAE\_CS42\_1BS\_TGAcv SGAGGDDGRAPLLYRTFRVKGFLINLYRLLTLVRLVIVVILFFTWRRM-----HRSDAMMLLWVIVSVDGLWVFGVTWLL 116
TRIAE\_CS42\_2AS\_TGAcv CGGE---DGRPLLYRTFKVGRFLVNTYRFLNLARLTAVIVFAFFAWRVQ-----HPDSAMMLLWVIVSVDGLWVFGVLSWLL 124
TRIAE\_CS42\_2BS\_TGAcv CSGE---DGRPLLYRTFKVGRFLVNTYRFLNLARLTAVIVFAFFAWRVQ-----HPDSAMMLLWVIVSVDGLWVFGVLSWLL 124
TRIAE\_CS42\_2DS\_TGAcv CGGE---DGRPLLYRTFKVGRFLVNTYRFLNLARLTAVIVFAFFAWRVQ-----HPDSAMMLLWVIVSVDGLWVFGVLSWLL 122
TRIAE\_CS42\_2BS\_TGAcv ----- 0
TRIAE\_CS42\_2DS\_TGAcv ----- 0
TRIAE\_CS42\_2AS\_TGAcv IADGGEDGRRPLLYRTFKVKGILLHPYRLLSLRLVAIVLFFVWRVR-----HPYADGMMLLWVIVSVDGLWVFGVTWLL 149
TRIAE\_CS42\_7AL\_TGAcv TDESGVAVDDRPFVFRTEKIKGVLLHPYRVLIFVRLIAFTLFIWIRIS-----HKNPDAMMLLWVIVSVDGLWVFGVLSWLL 153
TRIAE\_CS42\_7DL\_TGAcv ----- 0
TRIAE\_CS42\_7BL\_TGAcv TDESGAAVDDRPFVFRTEKIKGVLLHPYRVLIFVRLIAFTLFIWIRIS-----HKNPDAMMLLWVIVSVDGLWVFGVLSWLL 149

TRIAE\_CS42\_5DL\_TGAcv DQLPKMQPVRRTVYVTALE-----EPLRPTMDVFVTTTDPKEPPLVTVNTILSILAADYPPDKLTCYVSDDGGALL 173
TRIAE\_CS42\_5AL\_TGAcv DQLPKMQPVRRTVYATALE-----ESLPLAMDVFVTTADPEKPPVTVNTILSILAADYPPDKLTCYVSDDGGALL 173
TRIAE\_CS42\_5BL\_TGAcv DQLPKMQPVRRTVFATALE-----EPLRPTMDVFVTTADPEKPPVTVNTILSILAADYPPDKLTCYVSDDGGALL 173
TRIAE\_CS42\_2AS\_TGAcv YQLPKYNPIKMIPLDALTLRKQFDTPGRSSQLPGIDVIVTTASATDEPILYTMNCVLSILAADYHIGRCNCYLSDDSGSLV 222
TRIAE\_CS42\_2BS\_TGAcv YQLPKYNPIKMIPLDALTLRKQFDTPGRSSQLPGIDVIVTTASATDEPILYTMNCVLSILAADYHIGRCNCYLSDDSGSLV 221
TRIAE\_CS42\_2DS\_TGAcv YQLPKYNPIKMIPLDALTLRKQFDTPGRSSQLPGIDVIVTTASATDEPILYTMNCVLSILAADYHIGRCNCYLSDDSGSLV 214
TRIAE\_CS42\_2AS\_TGAcv NQLPKFNPVKTIIPDMVALRRQYDLPDGTSTLPGIDVIVTTADPIDEPILYTMNCVLSILASDYPVDRACACYSDDSGALI 196
TRIAE\_CS42\_2DS\_TGAcv NQLPKFNPVKTIIPDMVALRRQYDLPDGTSTLPGIDVIVTTADPIDEPILYTMNCVLSILASDYPVDRACACYSDDSGALI 196
TRIAE\_CS42\_2BS\_TGAcv NQLPKFNPVKTIIPDMVALRRQYDLPDGTSTLPGIDVIVTTADPIDEPILYTMNCVLSILASDYPVDRACACYSDDSGALI 200
TRIAE\_CS42\_2DL\_TGAcv NQLPKLNPVKRVP---DLADRHD-----DNLPLRQDVFVTTADPIDEPILYTMNCVLSILASDYPVDRACACYSDDSGALI 195
TRIAE\_CS42\_2BL\_TGAcv ----- 0
TRIAE\_CS42\_2AL\_TGAcv NQLPKLNPVKRVPDLAALADRHD-----DNLPLRQDVFVTTADPIDEPILYTMNCVLSILASDYPVDRACACYSDDSGALI 198
TRIAE\_CS42\_2DL\_TGAcv NQLPKLNPVKRVPDLATLADQHG-----DNLPLRQDVFVTTADPIDEPILYTMNCVLSILASDYPVDRACACYSDDSGALI 193
TRIAE\_CS42\_2BS\_TGAcv NQLPKLNPVKRVPDLAALADHSG-----DNLPLRQDVFVTTADPIDEPILYTMNCVLSILASDYPVDRACACYSDDSGALI 203
TRIAE\_CS42\_2DS\_TGAcv NQLPKLNPVKRVPDLAALADHSG-----DNLPLRQDVFVTTADPIDEPILYTMNCVLSILASDYPVDRACACYSDDSGALI 203
TRIAE\_CS42\_7AL\_TGAcv NQLPKLNPVKRVPDLVALADRHG-----DNLPLRQDVFVTTADPIDEPILYTMNCVLSILASDYPVDRACACYSDDSGALI 182
TRIAE\_CS42\_7DL\_TGAcv NQLPKLNPVKRVPDLAALADLHG-----DNLPLRQDVFVTTADPIDEPILYTMNCVLSILASDYPVDRACACYSDDSGALI 180
TRIAE\_CS42\_7BL\_TGAcv NQLPKLNPVKRVPDLAALADRHG-----DNLPLRQDVFVTTADPIDEPILYTMNCVLSILASDYPVDRACACYSDDSGALI 174
TRIAE\_CS42\_U\_TGAcv1 NQITPKLRPRKCVPSISVLRDHLQDQDGGSDLPGLDVFINTVDPVDEPMLYTMNSILSILATDYPVDRACACYSDDSGALI 195
TRIAE\_CS42\_1BS\_TGAcv NQITPKLRPRKCVPSISVLRDHLQDQDGGSDLPGLDVFINTVDPVDEPMLYTMNSILSILATDYPVDRACACYSDDSGALI 196
TRIAE\_CS42\_2AS\_TGAcv NQVPKLNPTICIPITPLLRQQFDLPDGGSNLPLVDVFI STVDPVDEPMLHTMNSILSILATDYPVDRACACYSDDSGALI 204
TRIAE\_CS42\_2BS\_TGAcv NQVPKLNPTICIPITPLLRQQFDLPDGGSNLPLVDVFI STVDPVDEPMLHTMNSILSILATDYPVDRACACYSDDSGALI 204
TRIAE\_CS42\_2DS\_TGAcv NQVPKLNPTICIPITPLLRQQFDLPDGGSNLPLVDVFI STVDPVDEPMLHTMNSILSILATDYPVDRACACYSDDSGALI 202
TRIAE\_CS42\_2BS\_TGAcv -----MIYTMNSIISILAADYPVDRACACYSDDSGALI 33
TRIAE\_CS42\_2DS\_TGAcv -----MIYTMNSIISILAADYPVDRACACYSDDSGALI 33
TRIAE\_CS42\_2AS\_TGAcv NQVAKLNPVKRVPDLTLEQQFDLPDGGSNLPLVDVFI STVDPVDEPMLHTMNSIISILAADYPVDRACACYSDDSGALI 229
TRIAE\_CS42\_7AL\_TGAcv DQLPKLNPINRVPDLAVLRQRFRDPRDGTSTLPLGLDIFVTTADPIKEPILSTANSVLSILAADYPVDRACACYSDDSGALI 233
TRIAE\_CS42\_7DL\_TGAcv ----- 0
TRIAE\_CS42\_7BL\_TGAcv DQLPKLNPINRVPDLAVLRQRFRDPRDGTSTLPLGLDIFVTTADPIKEPILSTANSVLSILAADYPVDRACACYSDDSGALI 229

TRIAE\_CS42\_5DL\_TGAcv TREAVAHAACFARLWVFPFCRKHGVEPRNPEAYFCPGVKARVVSRAADYMGSRWPELARDRRRVRREYEEELRLRIDALHAGD 253
TRIAE\_CS42\_5AL\_TGAcv TREAVAQAARFARLWVFPFCRKHGVEPRNPEAYFCPGVKARVVSRAADYRAKSWPELARDRRRVRREYEEELRLRIDALHAGD 253
TRIAE\_CS42\_5BL\_TGAcv TREAVAHAARFARLWVFPFCRKHGVEPRNPEAYFCPGVKARVVSRAADYMGSRWPELARDRRRVRREYEEELRLRIDALHAGD 253
TRIAE\_CS42\_2AS\_TGAcv LYEALVETAKFAALWVFPFCRKHQIEPRAPESYFELEGT-----LYTGSAPPEEFKNDHNSVYIEYDEFKHELDLSLSAI 295
TRIAE\_CS42\_2BS\_TGAcv LYEALVETAKFAALWVFPFCRKHQIEPRAPESYFELEGT-----LYTGSAPPEEFKNDHNSVYIEYDEFKHELDLSLSAI 294
TRIAE\_CS42\_2DS\_TGAcv LYEALVETAKFAALWVFPFCRKHQIEPRAPESYFELEGP-----LYTGSAPPEEFKNDHNSVYIEYDEFKHELDLSLSAI 287
TRIAE\_CS42\_2AS\_TGAcv QYEALVETAKFATLWVFPFCRKHCIIEPRAPESYFELEAP-----LYTGSAPPEEFKNDHNSVYIEYDEFKHELDLSLSAI 269
TRIAE\_CS42\_2DS\_TGAcv QYEALVETAKFATLWVFPFCRKHCIIEPRAPESYFELEAP-----LYTGSAPPEEFKNDHNSVYIEYDEFKHELDLSLSAI 269
TRIAE\_CS42\_2BS\_TGAcv QYEALVETAKFATLWVFPFCRKHCIIEPRAPESYFELEAP-----LYTGSAPPEEFKNDHNSVYIEYDEFKHELDLSLSAI 273
TRIAE\_CS42\_2DL\_TGAcv HYEAMVQVAFALWVFPFCRKHCVPEPRSPENYFGMKTR-----SYAGGMAGEFMRDHRVRREYEEFKVRIDSLSTTI 268
TRIAE\_CS42\_2BL\_TGAcv ---MVQVAFALWVFPFCRKHCVPEPRSPENYFGMKTR-----SYAGGMAGEFMRDHRVRREYEEFKVRIDSLSTTI 69
TRIAE\_CS42\_2AL\_TGAcv HYEAMVQVAFALWVFPFCRKHCVPEPRSPENYFGMKTR-----SYAGGMAGEFMRDHRVRREYEEFKVRIDSLSTTI 271
TRIAE\_CS42\_2DL\_TGAcv HYEAMVQVAFALWVFPFCRKHCVPEPRSPENYFGMKTR-----SYAGGMAGEFMRDHRVRREYEEFKVRIDSLSTTI 266
TRIAE\_CS42\_2BS\_TGAcv HYEAMVQVAFALWVFPFCRKHCVPEPRSPENYFGMKTR-----SYAGGMAGEFMRDHRVRREYEEFKVRIDSLSTTI 276
TRIAE\_CS42\_2DS\_TGAcv HYEAMVQVAFALWVFPFCRKHCVPEPRSPENYFGMKTR-----SYAGGMAGEFMRDHRVRREYEEFKVRIDSLSTTI 276
TRIAE\_CS42\_7AL\_TGAcv HYEAMVQVAFALWVFPFCRKHCVPEPRSPENYFGMKTR-----SYAGGMAGEFMRDHRVRREYEEFKVRIDSLSTTI 255
TRIAE\_CS42\_7DL\_TGAcv HYEAMVQVAFALWVFPFCRKHCVPEPRSPENYFGMKTR-----SYAGGMAGEFMRDHRVRREYEEFKVRIDSLSTTI 253
TRIAE\_CS42\_7BL\_TGAcv HYEAMVQVAFALWVFPFCRKHCVPEPRSPENYFGMKTR-----SYAGGMAGEFMRDHRVRREYEEFKVRIDSLSTTI 247
TRIAE\_CS42\_U\_TGAcv1 HYEGLQLAAEFAASWVFPFCRKHCVPEPRAPESYFWMKRG-----EYAGSAPKEFLDHRMRRAAYEEFKARLDGLSAAI 269
TRIAE\_CS42\_1BS\_TGAcv HYEGLQLAAEFAASWVFPFCRKHCVPEPRAPESYFWMKRG-----EYAGSAPKEFLDHRMRRAAYEEFKARLDGLSAAI 270
TRIAE\_CS42\_2AS\_TGAcv HYDGLVETAKFAALWVFPFCRKHCVPEPRAPESYFWMKTR-----PYKGNLPEEFLDHRMRRAAYEEFKARLDGLSAAI 277
TRIAE\_CS42\_2BS\_TGAcv HYDGLVETAKFAALWVFPFCRKHCVPEPRAPESYFWMKTR-----PYKGNLPEEFLDHRMRRAAYEEFKARLDGLSAAI 277
TRIAE\_CS42\_2DS\_TGAcv HYDGLVETAKFAALWVFPFCRKHCVPEPRAPESYFWMKTR-----PYKGNLPEEFLDHRMRRAAYEEFKARLDGLSAAI 275



TRIAE\_CS42\_2BS\_TGAcv HYDGLLETAKFAALWVPFCRKHSIEPRAPESYFSLNTR-----PYTGNAPQDFVNDRRHMCREYDEFKERLDALFTLI 106
TRIAE\_CS42\_2DS\_TGAcv HYDGLLETAKFAALWVPFCRKHSIEPRAPESYFSLNTR-----PYTGNAPQDFVNDRRHMCREYDEFKERLDALFTLI 106
TRIAE\_CS42\_2AS\_TGAcv HYDGLLETAKFAALWVPFCRKHSIEPRAPESYFSLNTR-----PYTGNAPQDFVNDRRHMCREYDEFKERLDALFTLI 302
TRIAE\_CS42\_7AL\_TGAcv TYEALAESSKFATLWVPFCRKHGIEPRGPESYFELKSH-----YMGRAQDFVNDRRRVRKEYDEFKARINLSLEHDI 306
TRIAE\_CS42\_7DL\_TGAcv ----- 0
TRIAE\_CS42\_7BL\_TGAcv TYEALAESSKFATLWVPFCRKHGIEPRGPESYFELKSH-----YMGRAQDFVNDRRRVRKEYDEFKARINLSLEHDI 302
TRIAE\_CS42\_5DL\_TGAcv VRPQ-----QWSRGTAEHNHAGVVEVLVGGPPGSTPELG-----VSDLLDLSSV 295
TRIAE\_CS42\_5AL\_TGAcv VRRQ-----QWSRGTAEHNHAGVVEVLVGGPPGSTPELG-----VSDLLDLSSV 295
TRIAE\_CS42\_5BL\_TGAcv VRRQ-----PWSRGTPEYHAGVVEVLVGGPPGSTPELG-----VSDLLDLSSV 295
TRIAE\_CS42\_2AS\_TGAcv RQRSDIYSRTGTK--DEDATVTWMADG-TQWPGTWLDPTEKHRHGHAGIVKIVQSHPEHVPLG-VQESNDNPLNFDV 371
TRIAE\_CS42\_2BS\_TGAcv RQRSDIYSKTGTK--DEDAKVWTMADG-TQWPGTWLDPTEKHRHGHAGIVKIVQSHPEHVPLG-VQESNDNPLNFDV 370
TRIAE\_CS42\_2DS\_TGAcv RQRADIYSKTGTK--DEDAKVWTMADG-TQWPGTWLDPTEKHRHGHAGIVKIVQSHPEHVPLG-VHESNDSSLNFDV 363
TRIAE\_CS42\_2AS\_TGAcv SKRSDAYNSMKTE--EGDANATWMANG-TQWPGSWIDTTEIHRKGHHAGIVKIVLDHSIRGHNLG-SQASTHN-LNFAST 344
TRIAE\_CS42\_2DS\_TGAcv SKRSDAYNSMKTE--EGDAKATWMANG-TQWPGSWIDTTEIHRKGHHAGIVKIVLDHSIRGHNLG-SQASTNN-LNFAST 344
TRIAE\_CS42\_2BS\_TGAcv SKRSDAYNSMKTG--EGDAKATWMANG-TQWPGSWIDTTEIHRKGHHAGIVKIVLDHSIRGHNLG-SQASTHN-LNFAST 348
TRIAE\_CS42\_2DL\_TGAcv RQRS---DAYNS-SNKGVSATWMADG-TQWPGTWVEQAENHRRGQHAGIVQVLLDHPSCPKQLGSSASTD-NPFDNSV 342
TRIAE\_CS42\_2BL\_TGAcv RQRS---DAYNS-SNKGVSATWMADG-TQWPGTWVEQAENHRRGQHAGIVQVLLDHPSCPKQLGSSASTD-NPFDNSV 143
TRIAE\_CS42\_2AL\_TGAcv RQRS---DAYNS-SNKGVSATWMADG-TQWPGTWVEQAENHRRGQHAGIVQVLLDHPSCPEPQLGSSASTD-NPFDNSV 345
TRIAE\_CS42\_2DL\_TGAcv RQRS---DAYNS--NGDGVHATRMADG-TQWPGTWVEQAENHRRGQHAGIVQVILEHPGCKPQLGSSASTD-NPFDNSV 338
TRIAE\_CS42\_2BS\_TGAcv RQRS---DAYNSSTKGDVVRATWMADG-TQWPGTWVEQAENHRRGQHAGIVQVILGHPSCPKQLGSSASTD-NPFDNSV 351
TRIAE\_CS42\_2DS\_TGAcv RQRS---DAYNSSTKGDVVRATWMADG-TQWPGTWVEQAENHRRGQHAGIVQVILGHPSCPKQLGSSASTD-NPFDNSV 351
TRIAE\_CS42\_7AL\_TGAcv RRRS---DAYN--KGDGVHATRMADG-TQWPGTWVEQAENHRRGQHAGIVQVMLDHPSCPKQLGSSASTD-NPFDNSV 328
TRIAE\_CS42\_7DL\_TGAcv RRRS---DAYN--KRDDGVHATRMADG-TQWAGTWIEQADNHRGQHAGIVQVMLDHPSCPKQLGSSASTD-NPFDNSV 326
TRIAE\_CS42\_7BL\_TGAcv RRRS---DAYN--KGDGVHATRMADG-TQWPGTWIEQADNHRGQHAGIVKIVMLDHPSCPKQLGSSASTD-KPVDLSNV 320
TRIAE\_CS42\_U\_TGAcv1 EQRSEACNRANGKDEECANATWMADGSTQWQGTWIKPAKGRKGGHHPAILQVMLDQPSKDPPELGMAASSD-HPLDLSAV 348
TRIAE\_CS42\_1BS\_TGAcv EQRSEACNRANG--KEEGADATWMADGSTQWQGTWIKPAKGRKGGHHPAILQVMLDQPSKDPPELGMAASSD-HPLDLSAV 347
TRIAE\_CS42\_2AS\_TGAcv QORSEAHGREDAK--GGG-GKATWMADG-TQWPGTWIEQAENHRRGQHAGIVQVMSQPSSEPELGEPASSDDPLDLSAV 355
TRIAE\_CS42\_2BS\_TGAcv QORSEAHGREDAK--GGG-GKATWMADG-TQWPGTWIEQAENHRRGQHAGIVQVMSQPSSEPELGEPASSDDPLDLSAV 354
TRIAE\_CS42\_2DS\_TGAcv QORSEAHGREDAK--GGG-GKATWMADG-TQWPGTWIEQAENHRRGQHAGIVQVMSQPSSEPELGEPASSDHSPLDLSAV 352
TRIAE\_CS42\_2BS\_TGAcv PKRSDVYNHAAAK---EGAKATWMADG-TQWPGTWIDPAENHRRGQHAGIVKIVMLKHPSEPELGLGASTN-SPLDLSAV 181
TRIAE\_CS42\_2BS\_TGAcv PKRSDVYNHAAAK---EGAKATWMADG-TQWPGTWIDPAENHRRGQHAGIVKIVMLKHPSEPELGLGASTN-SPLDLSAV 181
TRIAE\_CS42\_2AS\_TGAcv PKRSDVYNHAAAK---EGAKATWMADG-TQWPGTWIDPAENHRRGQHAGIVKIVMLKHPSEPELGLGASTN-SPLDLSAV 377
TRIAE\_CS42\_7AL\_TGAcv QORNDGYNAANAH--REGEPRTWMADG-TQWQGTWVDASENHRGQHAGIVLVLNHPSHRRQTGPPASAD-NPLDLSGV 383
TRIAE\_CS42\_7DL\_TGAcv ----- 0
TRIAE\_CS42\_7BL\_TGAcv QORNDGYNAANAH--REGEPRTWMADG-TQWQGTWVDASENHRGQHAGIVLVLNHPSHRRQTGPPASAD-NPLDLSGV 379
TRIAE\_CS42\_5DL\_TGAcv DVVRPAVVYMCREKRHRVHHRKAGAMNALLRTSAVLSNAPFILLNDCDHYVNSQALRAGVCLMLD-RGGSNVAVFQFP 374
TRIAE\_CS42\_5AL\_TGAcv DVVRPAVVYMCREKRHRVHHRKAGAMNALLRTSAVLSNAPFILLNDCDHYVNSQALRAGVCLMLD-RGGSNVAVFQFP 374
TRIAE\_CS42\_5BL\_TGAcv DVVRPAVVYMCREKRHRVHHRKAGAMNALLRTSAVLSNAPFILLNDCDHYVNSQALRAGVCLMLD-RGGSNVAVFQFP 374
TRIAE\_CS42\_2AS\_TGAcv DMRLPMLVYVAREKSPGVEHNKAGALNAELRISALLSNAPFFINFCDDHYINNSEALRAAICFMLDPRDQNTAFVQFP 451
TRIAE\_CS42\_2BS\_TGAcv DMRLPMLVYVAREKSPGVEHNKAGALNAELRISALLSNAPFFINFCDDHYINNSEALRAAICFMLDPRDQNTAFVQFP 450
TRIAE\_CS42\_2DS\_TGAcv DMRLPMLVYVAREKCPGVEHNKAGALNAELRISALLSNAPFFINFCDDHYINNSEALHAAVCFMLDPRDQNTAFVQFP 443
TRIAE\_CS42\_2AS\_TGAcv DMRLPMLVYISRGKNPSYDNHKKAGALNAELRISALLSNAPFFINFCDDHYINNSEALRAAICFMLDPRDQNTAFVQFP 424
TRIAE\_CS42\_2DS\_TGAcv DVRLPMLVYISRGKNPSYDNHKKAGALNAELRISALLSNAPFFINFCDDHYINNSEALRAAICFMLDPRDQNTAFVQFP 424
TRIAE\_CS42\_2BS\_TGAcv DVRLPMLVYISRGKNPSYDNHKKAGALNAELRISALLSNAPFFINFCDDHYINNSEALRAAICFMLDPRDQNTAFVQFP 428
TRIAE\_CS42\_2DL\_TGAcv DVRLPMLVYISREKRPGYDNQKKAGAMNMLRVSALLSNAPFFINFCDDHYINNSEALRAAICFMLDPRDQNTAFVQFP 422
TRIAE\_CS42\_2BL\_TGAcv DTRLPMLVYISREKRPGYDNQKKAGAMNMLRVSALLSNAPFFINFCDDHYINNSEALRAAICFMLDPRDQNTAFVQFP 223
TRIAE\_CS42\_2AL\_TGAcv DTRLPMLVYISREKRPGYDNQKKAGAMNMLRVSALLSNAPFFINFCDDHYINNSEALRAAICFMLDPRDQNTAFVQFP 425
TRIAE\_CS42\_2DL\_TGAcv DTRLPMLVYISREKRPGYDNQKKAGAMNMLRVSALLSNAPFFINFCDDHYINNSEALRAAICFMLDPRDQNTAFVQFP 418
TRIAE\_CS42\_2BS\_TGAcv DTRLPMLVYMSREKRPGYDNQKKAGAMNMLRVSALLSNAPFFINFCDDHYINNSEALRAAICFMLDPRDQNTAFVQFP 431
TRIAE\_CS42\_2DS\_TGAcv DTRLPMLVYMSREKRPGYDNQKKAGAMNMLRVSALLSNAPFFINFCDDHYINNSEALRAAICFMLDPRDQNTAFVQFP 431
TRIAE\_CS42\_7AL\_TGAcv DTRLPMLVYISREKHPGYDNQKKAGAMNMLRVSALLSNAPFFINFCDDHYINNSEALRAAICFMLDPRDQNTAFVQFP 408
TRIAE\_CS42\_7DL\_TGAcv DTRLPMLVYISREKHPGYDNQKKAGAMNMLRVSALLSNAPFFINFCDDHYINNSEALRAAICFMLDPRDQNTAFVQFP 406
TRIAE\_CS42\_7BL\_TGAcv DTRLPMLVYISREKRPGYDNQKKAGAMNMLRVSALLSNAPFFINFCDDHYINNSEALRAAICFMLDPRDQNTAFVQFP 400
TRIAE\_CS42\_U\_TGAcv1 DARLPMLVYIAREKRPGYDHQKKAGALNVQLRVSALLSNAPFFINFCDDHYVNSQAFRAAICFMLDPRDQNTAFVQFP 428
TRIAE\_CS42\_1BS\_TGAcv DARLPMLVYIAREKRPGYDHQKKAGALNVQLRVSALLSNAPFFINFCDDHYVNSQAFRAAICFMLDPRDQNTAFVQFP 427
TRIAE\_CS42\_2AS\_TGAcv DVRLPMLVYVAREKRPGYDHQKKAGALNVQLRVSALLSNAPFFINFCDDHYVNSQAFRAAICFMMDRRDGDNVAVFQFP 435
TRIAE\_CS42\_2BS\_TGAcv DVRLPMLVYVAREKRPGYDHQKKAGALNVQLRVSALLSNAPFFINFCDDHYVNSQAFRAAICFMMDRRDGDNVAVFQFP 434
TRIAE\_CS42\_2DS\_TGAcv DVRLPMLVYVAREKRPGYDHQKKAGALNVQLRVSALLSNAPFFINFCDDHYVNSQAFRAAICFMMDRRDGDNVAVFQFP 432
TRIAE\_CS42\_2BS\_TGAcv DVRLPMLVYISREKSPSCDHQKKAGAMNMLRVSALLSNAPFFINFCDDHYVNSKAFRAGICFMLDRREGDNTAFVQFP 261
TRIAE\_CS42\_2DS\_TGAcv DVRLPMLVYISREKSPSCDHQKKAGAMNMLRVSALLSNAPFFINFCDDHYVNSKAFRAGICFMLDRREGDNTAFVQFP 261
TRIAE\_CS42\_2AS\_TGAcv DVRLPMLVYISREKSPSCDHQKKAGAMNMLRVSALLSNAPFFINFCDDHYVNSKAFRAGICFMLDRREGDNTAFVQFP 457
TRIAE\_CS42\_7AL\_TGAcv DVRLPMLVYVXXXXX-----XXXXXX-XXXXXXXXXXXX 416
TRIAE\_CS42\_7DL\_TGAcv -----MVG-RDSDTAVFVQFP 15
TRIAE\_CS42\_7BL\_TGAcv DARLPMLVYVAREKRPGYDHQKKAGAMNMLRVSALLSNAPFFINFCDDHYVNSQALRAGICFMMVG-RDSDTAVFVQFP 458
TRIAE\_CS42\_5DL\_TGAcv QRFDDVDPADRYANHNRFVDTTELGLDGLQGTIVYGTGCMFRRALYIADPPLWRPHGGDRDAGK----- 440
TRIAE\_CS42\_5AL\_TGAcv QRFDDVDPADRYANHNRFVDTTELGLDGLQGTIVYGTGCMFRRALYIADPPLWRPHG-DRDAGK----- 439
TRIAE\_CS42\_5BL\_TGAcv QRFDDVDPADRYANHNRFVDTTELGLDGLQGTIVYGTGCMFRRALYIADPPLWRPHGGDRDAGK----- 440
TRIAE\_CS42\_2AS\_TGAcv QRFDDVDPDRYGNHNRFVDTAMYGILNGOQGTIVYGTGCMFRRALYIADPPLWRPHGGDRDAGK----- 516
TRIAE\_CS42\_2BS\_TGAcv QRFDDVDPDRYGNHNRFVDTAMYGILNGOQGTIVYGTGCMFRRALYIADPPLWRPHGGDRDAGK----- 515
TRIAE\_CS42\_2DS\_TGAcv QRFDDVDPDRYGNHNRFVDTAMYGILNGOQGTIVYGTGCMFRRALYIADPPLWRPHGGDRDAGK----- 508
TRIAE\_CS42\_2AS\_TGAcv QRFDDVDPDRYGNHNRFVDTMLALNGLQGTIVYGTGCMFRRALYIADPPEWRHANIIVDDK----- 489
TRIAE\_CS42\_2DS\_TGAcv QRFDDVDPDRYGNHNRFVDTMLALNGLQGTIVYGTGCMFRRALYIADPPEWRHANIIVDDK----- 489
TRIAE\_CS42\_2BS\_TGAcv QRFDDVDPDRYGNHNRFVDTMLALNGLQGTIVYGTGCMFRRALYIADPPEWRHANIIVDDK----- 493
TRIAE\_CS42\_2DL\_TGAcv QRFDDVDPDRYANHNRFVDTMLALNGLQGTIVYGTGCMFRRALYIADPPEWRHANIIVDDK----- 487
TRIAE\_CS42\_2BL\_TGAcv QRFDDVDPDRYANHNRFVDTMLALNGLQGTIVYGTGCMFRRALYIADPPEWRHANIIVDDK----- 288
TRIAE\_CS42\_2AL\_TGAcv QRFDDVDPDRYANHNRFVDTMLALNGLQGTIVYGTGCMFRRALYIADPPEWRHANIIVDDK----- 490
TRIAE\_CS42\_2DL\_TGAcv QRFDDVDPDRYANHNRFVDTMLALNGLQGTIVYGTGCMFRRALYIADPPEWRHANIIVDDK----- 483
TRIAE\_CS42\_2BS\_TGAcv QRFDDVDPDRYANHNRFVDTMLALNGLQGTIVYGTGCMFRRALYIADPPEWRHANIIVDDK----- 496

TRIAE\_CS42\_2DS\_TGAcv QRFDDVDPTDRYANHNRFVFDSTMLSLNGLQGFVYLGFGTMFRRWALYGMSEPPRYRAENIKLAGK----- 496  
TRIAE\_CS42\_7AL\_TGAcv QRFDDVDPTDRYSNHNRFVFDSTMLSLNGLQGFVYLGFGTMFRRWALYGMSEPPRYKAENIKLVGK----- 473  
TRIAE\_CS42\_7DL\_TGAcv QRFDDVDPTDRYSNHNRFVFDSTMLSLNGLQGFVYLGFGTMFRRWALYGMSEPPRYRAENIKLVGK----- 471  
TRIAE\_CS42\_7BL\_TGAcv QRFDDVDPTDRYSNHNRFVFDSTMLSLNGLQGFVYLGFGTMFRRWALYGMSEPPRYRAENIKLVGK----- 465  
TRIAE\_CS42\_U\_TGAcv1 QRFDDVDPTDRYCNHNRFVFDATLLGLNGLIQGFSVVGTCMFRRWALYSADEPRWRPDDAKEAKAS----- 494  
TRIAE\_CS42\_1BS\_TGAcv QRFDDVDPTDRYCNHNRFVFDATLLGLNGLIQGFSVVGTCMFRRWALYSADEPRWRPDDAKEAKAS----- 493  
TRIAE\_CS42\_2AS\_TGAcv QRFDDVDPTDRYANHNRFVFDATMLGMNGIQGFSVVGTCMFRRWALYGADEPRWRPDDVKVLEN----- 500  
TRIAE\_CS42\_2BS\_TGAcv QRFDDVDPTDRYANHNRFVFDATMLGMNGIQGFSVVGTCMFRRWALYGADEPRWRPDDVKVLEN----- 499  
TRIAE\_CS42\_2DS\_TGAcv QRFDDVDPTDRYANHNRFVFDATMLGMNGIQGFSVVGTCMFRRWALYGADEPRWRPDDVKVLEN----- 497  
TRIAE\_CS42\_2BS\_TGAcv QRFDDVDPTDRYCNHNRFVFDATLLGLNGLIQGFSVVGTCMFRRWALYGVDEPRWRPDDVKIVDS----- 326  
TRIAE\_CS42\_2DS\_TGAcv QRFDDVDPTDRYCNHNRFVFDATLLGLNGLIQGFSVVGTCMFRRWALYGVDEPRWRPDDVKIVDS----- 326  
TRIAE\_CS42\_2AS\_TGAcv QRFDDVDPTDRYCNHNRFVFDATLLGLNGLIQGFSVVGTCMFRRWALYGVDEPRWRPDDVKIVDS----- 522  
TRIAE\_CS42\_7DL\_TGAcv XXXXXXXXXXXXXVYANHNRFVFDSTRALDGMQGFVYVGTGCLFRRITVYGFDEPRINVGGPCFPRLAGLFAKTKYEKPGLE 496  
TRIAE\_CS42\_7DL\_TGAcv QRFEGVPTDLYANHNRFVFDSTRALDGMQGFVYVGTGCLFRRITVYGFDEPRINVGGPCFPRLAGLFAKTKYEKPGLE 95  
TRIAE\_CS42\_7BL\_TGAcv QRFEGVPTDLYANHNRFVFDSTRALDGMQGFVYVGTGCLFRRITVYGFDEPRINVGGPCFPRLAGLFAKTKYEKPSLE 538

TRIAE\_CS42\_5DL\_TGAcv -----DVATEADKFGISITPFLGSRVALLGLNRSEQWNTTTPRPSFDGAAVGEATALVSCGYEDRTA 502  
TRIAE\_CS42\_5AL\_TGAcv -----DVAAEADKFGISITPFLGSRVALLNLNQSEQWNTTS-PPRPSFDGAAVGEATALVSCGYEDRTA 500  
TRIAE\_CS42\_5BL\_TGAcv -----DVATEADKFGISITPFLVSVRAALNLNRSEQWNTTS-PPRPSFDGAAVGEATALVSCGYEDRTA 501  
TRIAE\_CS42\_2AS\_TGAcv -----RFGNSLFLNLSVLAALIKQEEG-----VTLQPLDDSFLEEMTKVYVSSSYDSDSD 565  
TRIAE\_CS42\_2BS\_TGAcv -----RFGNSLFLNLSVLAALIKQEEG-----VTLPPPLDDSFLEEMTKVYVSSSYDSDSD 564  
TRIAE\_CS42\_2DS\_TGAcv -----RFGNSLFLNLSVLAALIKQEEG-----VTLPTLDDSFLEEMTKVYVSSSYDSDSD 557  
TRIAE\_CS42\_2AS\_TGAcv -----RFGSSITPFLNLSVSKAINQER-----STIPPISETLVAMERVVSASHDKATG 537  
TRIAE\_CS42\_2DS\_TGAcv -----RFGSSITPFLNLSVSKAINQER-----STIPPISETLVAMERVVSASHDKATG 537  
TRIAE\_CS42\_2BS\_TGAcv -----RFGSSITPFLNLSVSKAINQER-----STIPPISETLVAMERVVSASHDKATG 541  
TRIAE\_CS42\_2DL\_TGAcv -----TGEFGYSTSFINSVPDAAIQDR-----SITPVLVDEHLRKLATLMTCAYEDGSS 537  
TRIAE\_CS42\_2BL\_TGAcv -----TGEFGYSTSFINSVPDAAIQDR-----SITPVLVDERLSKDLATLMTCAYEDGSS 338  
TRIAE\_CS42\_2AL\_TGAcv -----AGEFGYSTSFINSVPDAAIQDR-----SITPVLVDEGLRKLATLMTCAYEDGSS 540  
TRIAE\_CS42\_2DL\_TGAcv -----AHEFGYSTSFINSMPDCAIQER-----SITPVLVDEGLINDLATLMTCAYEDGSS 533  
TRIAE\_CS42\_2BS\_TGAcv -----VNEFGYSTSFINSMPDCAIQER-----SITPVLVDEALSNDLATLMTCAYEDGSS 546  
TRIAE\_CS42\_2DS\_TGAcv -----VNEFGYSTSFINSMPDCAIQER-----SITPVLVDEALSNDLATLMTCAYEDGSS 546  
TRIAE\_CS42\_7AL\_TGAcv -----AAELGNSITPFLNLSIPDCAIQER-----SITPVLVDEALTSDLATLMTCAYEDRTS 523  
TRIAE\_CS42\_7DL\_TGAcv -----AAELGNSITPFLNLSIPDCAIQER-----SITPVLVDEGLSNDIATLMTCTYEDGSS 521  
TRIAE\_CS42\_7BL\_TGAcv -----GAELGKSTPFLNLSIPDCAIQDR-----SITPVSVDEGLMSDLATLMTCAYEDRTS 515  
TRIAE\_CS42\_U\_TGAcv1 -----RYRPNMFGKSTSFINSMPAAANQERS-----VPSPATVGE---ABLADAMTCAYEDGTE 545  
TRIAE\_CS42\_1BS\_TGAcv -----RYRPNMFGKSTSFINSVPAAANQERS-----VPSPATVGE---ABLADAMTCAYEDGTE 544  
TRIAE\_CS42\_2AS\_TGAcv -----PNKFGKSTMTFINSIPVAANQERS-----VMSPVSLDEPATTELADVMTCAYEDGTE 551  
TRIAE\_CS42\_2BS\_TGAcv -----PNKFGKSTMTFINSIPVAANQERS-----VMSPVSLDEPATTELADVMTCAYEDGTE 550  
TRIAE\_CS42\_2DS\_TGAcv -----PNKFGKSTMTFINSIPVAANQERS-----VMSPVSLDEPATTELADVMTCAYEDGTE 548  
TRIAE\_CS42\_2BS\_TGAcv -----STKFGSSASTFISILPAAADQERS-----IMSPPALEEPVMAADLAHVMTCAYEDGTE 377  
TRIAE\_CS42\_2DS\_TGAcv -----STKFGSSASTFISILPAAADQERS-----IMSPPALEESVMAADLAHVMTCAYEDGTE 377  
TRIAE\_CS42\_2AS\_TGAcv -----STKFGSSASTFISILPAAADQERS-----IMSPPALEEPVMAADLAHVMTCAYEDGTE 573  
TRIAE\_CS42\_7AL\_TGAcv MTMAKAKAAPVPAKGKHGFLPLPKKTYGKSDAFVDSIPRASHSPY----AAAAEGIVADEATIVEAVNVTAFAFEKKTG 522  
TRIAE\_CS42\_7DL\_TGAcv MTMAKAKAAPVPAKGKHGFLPLPKKTYGKSDAFVDSIPRASHSPY----AAAAEGIVADEATIVEAVNVTAFAFEKKTG 171  
TRIAE\_CS42\_7BL\_TGAcv MTMAKAKAAPVPAKGKHGFLPLPKKTYGKSDAFVDSIPRASHSPY----AAAAEGIVADEATIVEAVNVTAFAFEKKTG 614

TRIAE\_CS42\_5DL\_TGAcv WGRDVGWYIYGTATEDVATGFCMHRGWRSMACATAPDAFRGTAPINLTERLYOVLRWVWAGSLEIFFSRNNALLAGARLHP 582  
TRIAE\_CS42\_5AL\_TGAcv WGRDVGWYIYGTATEDVATGFCMHRGWRSMACATAPDAFRGTAPINLTERLYOVLRWVWAGSLEIFFSRNNALLAGARLHP 580  
TRIAE\_CS42\_5BL\_TGAcv WGRDVGWYIYGTATEDVATGFCMHRGWRSMACATAPDAFRGTAPINLTERLYOVLRWVWAGSLEIFFSRNNALLAGARLHP 581  
TRIAE\_CS42\_2AS\_TGAcv WGRGIGYLYNMATEDVATGFERIHGCGWRSMYATMERDAFRGTAPINLTERLYOVLRWVWAGSLEIFFSRNNALLAGARLHP 645  
TRIAE\_CS42\_2BS\_TGAcv WGRGIGYLYNMATEDVATGFERIHGCGWRSMYATMERDAFRGTAPINLTERLYOVLRWVWAGSLEIFFSHISPLFAGRRLSL 644  
TRIAE\_CS42\_2DS\_TGAcv WGRGIGYLYNMATEDVATGFERIHGCGWRSMYATMERDAFRGTAPINLTERLYOVLRWVWAGSLEIFFSHISPLFAGRRLSL 637  
TRIAE\_CS42\_2AS\_TGAcv WKGKVGYYDYDIATEDVATGFERIHGCGWRSMYCTMERDAFCGHTAPINLTERLYOVLRWVWAGSLEIFFSLLNPLIGGRRIQS 617  
TRIAE\_CS42\_2DS\_TGAcv WKGKVGYYDYDIATEDVATGFERIHGCGWRSMYCTMERDAFCGHTAPINLTERLYOVLRWVWAGSLEIFFSLLNPLIGGRRIQS 617  
TRIAE\_CS42\_2BS\_TGAcv WKGKVGYYDYDIATEDVATGFERIHGCGWRSMYCTMERDAFCGHTAPINLTERLYOVLRWVWAGSLEIFFSLLNPLIGGRRIQS 621  
TRIAE\_CS42\_2DL\_TGAcv WGRDVGWYNIATEDVATGFERIHGCGWRSMYCSMEPAFRGTAPINLTERLYOVLRWVWAGSLEVFFSHSNALIASRRLHP 617  
TRIAE\_CS42\_2BL\_TGAcv WGRDVGWYNIATEDVATGFERIHGCGWRSMYCSMEPAFRGTAPINLTERLYOVLRWVWAGSLEVFFSHSNALIASRRLHP 418  
TRIAE\_CS42\_2AL\_TGAcv WGRDVGWYNIATEDVATGFERIHGCGWRSMYCSMEPAFRGTAPINLTERLYOVLRWVWAGSLEVFFSHSNALIASRRLHL 620  
TRIAE\_CS42\_2DL\_TGAcv WGRDVGWYNIATEDVATGFERIHGCGWRSMYCSMEPAFRGTAPINLTERLYOVLRWVWAGSLEVFFSHSNALIASRRLHP 613  
TRIAE\_CS42\_2BS\_TGAcv WGRDVGWYNIATEDVATGFERMHRGWRSMYCSMEPAFRGTAPINLTERLYOVLRWVWAGSLEMFSSHSNALMAGRRLHP 626  
TRIAE\_CS42\_2DS\_TGAcv WGRDVGWYNIATEDVATGFERMHRGWRSMYCSMEPAFRGTAPINLTERLYOVLRWVWAGSLEMFSSHSNALMAGRRLHP 626  
TRIAE\_CS42\_7AL\_TGAcv WGRDVGWYNIATEDVATGFERIHGCGWRSMYCSMEPAFRGTAPINLTERLYOVLRWVWAGSLEAFFSHSNALIASRRLHP 603  
TRIAE\_CS42\_7DL\_TGAcv WGRDVGWYNIATEDVATGFERIHGCGWRSMYCSMEPAFRGTAPINLTERLYOVLRWVWAGSLEVFFSHSNALIASRRLN 601  
TRIAE\_CS42\_7BL\_TGAcv WGRDVGWYNIATEDVATGFERIHGCGWRSMYCSMEPAFRGTAPINLTERLYOVLGG----- 572  
TRIAE\_CS42\_U\_TGAcv WGRDVGWYNIATEDVATGFERLHRTGWRSMYCSMEPAFRGTAPINLTERLYOVLRWVWAGSLEMFSSRFPCLLAGRRLHP 625  
TRIAE\_CS42\_1BS\_TGAcv WGRDVGWYNIATEDVATGFERLHRTGWRSMYCSMEPAFRGTAPINLTERLYOVLRWVWAGSLEMFSSRFPCLLAGRRLHP 624  
TRIAE\_CS42\_2AS\_TGAcv WGDGVGWYDMATEDVATGFERLHRTGWRSMYCSMEPAFRGTAPINLTERLYOVLRWVWAGSLEVFFSSRFPCLLAGRRLHP 631  
TRIAE\_CS42\_2BS\_TGAcv WGDGVGWYDMATEDVATGFERLHRTGWRSMYCSMEPAFRGTAPINLTERLYOVLRWVWAGSLEVFFSSRFPCLLAGRRLHP 630  
TRIAE\_CS42\_2DS\_TGAcv WGDGVGWYDMATEDVATGFERLHRTGWRSMYCSMEPAFRGTAPINLTERLYOVLRWVWAGSLEVFFSSRFPCLLAGRRLHP 628  
TRIAE\_CS42\_2BS\_TGAcv WGREVGWYNIATEDVATGFERLHRTGWRSMYCSMEPAFRGTAPINLTERLYOVLRWVWAGSLEMFSSRFPCLLAGRRLHP 457  
TRIAE\_CS42\_2DS\_TGAcv WGREVGWYNIATEDVATGFERLHRTGWRSMYCSMEPAFRGTAPINLTERLYOVLRWVWAGSLEMFSSRFPCLLAGRRLHP 457  
TRIAE\_CS42\_2AS\_TGAcv WGREVGWYNIATEDVATGFERLHRTGWRSMYCSMEPAFRGTAPINLTERLYOVLRWVWAGSLEMFSSRFPCLLAGRRLHP 653  
TRIAE\_CS42\_7AL\_TGAcv WKEHVGWYDVTATEDVATGFERMHRGWRSMYCSYIPHAFIGTAPINLTERLYOVLRWVWAGSLEIFFSKNNPLFGSTYLHP 652  
TRIAE\_CS42\_7DL\_TGAcv WKEHVGWYDVTATEDVATGFERMHRGWRSMYCSYIPHAFIGTAPINLTERLYOVLRWVWAGSLEIFFSKNNPLFGSTYLHP 251  
TRIAE\_CS42\_7BL\_TGAcv WKEHVGWYDVTATEDVATGFERMHRGWRSMYCSYIPHAFIGTAPINLTERLYOVLRWVWAGSLEIFFSKNNPLFGSTYLHP 694

TRIAE\_CS42\_5DL\_TGAcv LQRLAYLNTTVYPPTSIFLLLYCLLPAIPLVTRASASAFSVNTMPPSGTYMGFVAALMLTLAMVAVLEVRWSGITLGEWW 662  
TRIAE\_CS42\_5AL\_TGAcv LQRLAYLNTTVYPPTSIFLLLYCLLPAIPLVTRASTASAFSVNTMPPSATYIGFVAALMLTLAMVAVLEVRWSGITLGEWW 660  
TRIAE\_CS42\_5BL\_TGAcv LQRLAYLNTTVYPPTSIFLLLYCLLPAIPLVTRASASTASAFSVNTMPPSATYIGFVAALMLTLAMVAVLEVRWSGITLGEWW 661  
TRIAE\_CS42\_2AS\_TGAcv VQRLSYINFTIYPLTSLFILMYAFCPVMWLLP-----TEILVQRPYTRYIVYLIIVIAMIHVGMFIMWAGITWLDWW 719  
TRIAE\_CS42\_2BS\_TGAcv VQRLSYINFTIYPLTSLFILMYAFCPVMWLLP-----TEILVQRPYTRYIVYLIIVIAMIHVGMFIMWAGITWLDWW 718

TRIAE\_CS42\_2DS\_TGACv VQRLSYINFTIYPLTSLFILMYAFCPVMWLLP-----TEILVQRPYTRYIVYLIIVIVMHIHVIGMFEIMWAGITWLDWW 711
TRIAE\_CS42\_2AS\_TGACv LQRVSYLNMTVYPVTSFLFILLYALSPVMWLLIP-----DEVYIQRPFYKYVVFLLVILMIHVIGWLEIKWAGVWTLDDY 691
TRIAE\_CS42\_2DS\_TGACv LQRVSYLNMTVYPVTSFLFILLYALSPVMWLLIP-----DEVYIQRPFYKYVVFLLVILMIHVIGWLEIKWAGVWTLDDY 691
TRIAE\_CS42\_2BS\_TGACv LQRVSYLNMTVYPVTSFLFILLYALSPVMWLLIP-----DEVYIQRPFYKYVVFLLVILMIHVIGWLEIKWAGVWTLDDY 695
TRIAE\_CS42\_2DL\_TGACv LQRIAYLNMTSTHPIVTVFILSYNFFPVMWLF-----EQLYIQRPFYKYVVFLLVILMIHVIGWLEIKWAGVWTLDDY 691
TRIAE\_CS42\_2BL\_TGACv LQRIAYLNMTSTHPIVTVFILSYNFFPVMWLF-----EQLYIQRPFYKYVVFLLVILMIHVIGWLEIKWAGVWTLDDY 492
TRIAE\_CS42\_2AL\_TGACv LQRIAYLNMTSTHPIVTVFILSYNFFPVMWLF-----EQLYIQRPFYKYVVFLLVILMIHVIGWLEIKWAGVWTLDDY 694
TRIAE\_CS42\_2DL\_TGACv LQRIAYLNMTSTHPIVTVFILSYNFFPVMWLF-----EQLYIQRPFYKYVVFLLVILMIHVIGWLEIKWAGVWTLDDY 687
TRIAE\_CS42\_2BS\_TGACv LQRIAYLNMTSTHPIVTVFILSYNFFPVMWLF-----EQLYIQRPFYKYVVFLLVILMIHVIGWLEIKWAGVWTLDDY 693
TRIAE\_CS42\_2DS\_TGACv LQRIAYLNMTSTHPIVTVFILSYNFFPVMWLF-----EQLYIQRPFYKYVVFLLVILMIHVIGWLEIKWAGVWTLDDY 700
TRIAE\_CS42\_7AL\_TGACv LQRIAYLNMTSTHPIVTVFILSYNFFPVMWLF-----EQLYIQRPFYKYVVFLLVILMIHVIGWLEIKWAGVWTLDDY 678
TRIAE\_CS42\_7DL\_TGACv LQRIAYLNMTSTHPIVTVFILSYNFFPVMWLF-----EQLYIQRPFYKYVVFLLVILMIHVIGWLEIKWAGVWTLDDY 676
TRIAE\_CS42\_7BL\_TGACv LQRIAYLNMTSTHPIVTVFILSYNFFPVMWLF-----EQLYIQRPFYKYVVFLLVILMIHVIGWLEIKWAGVWTLDDY 572
TRIAE\_CS42\_U\_TGACv1 MQRVAYINMTTYPVSTFFICMYIYLPVMWLFQ-----GEFYIQRPFYKYVVFLLVILMIHVIGWLEIKWAGVWTLDDY 699
TRIAE\_CS42\_1BS\_TGACv MQRVAYINMTTYPVSTFFICMYIYLPVMWLFQ-----GEFYIQRPFYKYVVFLLVILMIHVIGWLEIKWAGVWTLDDY 698
TRIAE\_CS42\_2AS\_TGACv MQRVAYINMTTYPVSTFFICMYIYLPVMWLFQ-----GEFYIQRPFYKYVVFLLVILMIHVIGWLEIKWAGVWTLDDY 705
TRIAE\_CS42\_2BS\_TGACv MQRVAYINMTTYPVSTFFICMYIYLPVMWLFQ-----GEFYIQRPFYKYVVFLLVILMIHVIGWLEIKWAGVWTLDDY 704
TRIAE\_CS42\_2DS\_TGACv MQRVAYINMTTYPVSTFFICMYIYLPVMWLFQ-----GEFYIQRPFYKYVVFLLVILMIHVIGWLEIKWAGVWTLDDY 702
TRIAE\_CS42\_2BS\_TGACv MQRVAYINMTTYPVSTFFICMYIYLPVMWLFQ-----GEFYIQRPFYKYVVFLLVILMIHVIGWLEIKWAGVWTLDDY 531
TRIAE\_CS42\_2DS\_TGACv MQRVAYINMTTYPVSTFFICMYIYLPVMWLFQ-----GEFYIQRPFYKYVVFLLVILMIHVIGWLEIKWAGVWTLDDY 531
TRIAE\_CS42\_2AS\_TGACv MQRVAYINMTTYPVSTFFICMYIYLPVMWLFQ-----GEFYIQRPFYKYVVFLLVILMIHVIGWLEIKWAGVWTLDDY 727
TRIAE\_CS42\_7AL\_TGACv LQRVAYINITTYPTAIFLIFYTTPALSFTVG-----HFIVQRPTMFMVYVYLGIVLSTLLVIAVLEVKWAGVTFEWF 726
TRIAE\_CS42\_7DL\_TGACv LQRVAYINITTYPTAIFLIFYTTPALSFTVG-----HFIVQRPTMFMVYVYLGIVLSTLLVIAVLEVKWAGVTFEWF 325
TRIAE\_CS42\_7BL\_TGACv LQRVAYINITTYPTAIFLIFYTTPALSFTVG-----HFIVQRPTMFMVYVYLGIVLSTLLVIAVLEVKWAGVTFEWF 768

TRIAE\_CS42\_5DL\_TGACv RNEQFWMVSATSAYAAAVVQVALKVSAGKEIAFKLTSKQRAS-SPGGGVKERFAELYAVRWTVLMVPTAVVLAVNVMSMA 741
TRIAE\_CS42\_5AL\_TGACv RNEQFWMVSATSAYAAAVVQVALKVAAGKEIAFKLTSKHRASNSGGGVVDRFAELYAVRWTVLMVPTAVVLAVNVMSMA 740
TRIAE\_CS42\_5BL\_TGACv RNEQFWMVSATSAYAAAVVQVALKVAAGKEIAFKLTSKQRASAGGGVVKRQVGVAREMDGADGSDGGGADGERGVHG 741
TRIAE\_CS42\_2AS\_TGACv RNEQFFMIGSVTAYPTAVLHMVNNLLTKKGIHFRVTTKQPVADTDDK-----YAEMYEVHVVPMMPAVVLFNSILAIG 794
TRIAE\_CS42\_2BS\_TGACv RNEQFFMIGSVTAYPTAVLHMVNNLLTKKGIHFRVTTKQPVADTDDK-----YAEMYEVHVVPMMPAVVLFNSILAIG 793
TRIAE\_CS42\_2DS\_TGACv RNEQFFMIGSVTAYPTAVLHMVNNLLTKKGIHFRVTTKQPVADTDDK-----YAEMYEVHVVPMMPAVVLFNSILAIG 786
TRIAE\_CS42\_2AS\_TGACv RNEQFFMIGSVTAYPTAVLHMVNNLLTKKGIHFRVTTKQPVADTDDK-----YAEMYEVHVVPMMPAVVLFNSILAIG 766
TRIAE\_CS42\_2DS\_TGACv RNEQFFMIGSVTAYPTAVLHMVNNLLTKKGIHFRVTTKQPVADTDDK-----YAEMYEVHVVPMMPAVVLFNSILAIG 766
TRIAE\_CS42\_2BS\_TGACv RNEQFFMIGSVTAYPTAVLHMVNNLLTKKGIHFRVTTKQPVADTDDK-----YAEMYEVHVVPMMPAVVLFNSILAIG 770
TRIAE\_CS42\_2DL\_TGACv RNEQFFMIGSVTAYPTAVLHMVNNLLTKKGIHFRVTTKQPVADTDDK-----YAEMYEVHVVPMMPAVVLFNSILAIG 766
TRIAE\_CS42\_2BL\_TGACv RNEQFFMIGSVTAYPTAVLHMVNNLLTKKGIHFRVTTKQPVADTDDK-----YAEMYEVHVVPMMPAVVLFNSILAIG 567
TRIAE\_CS42\_2AL\_TGACv RNEQFFMIGSVTAYPTAVLHMVNNLLTKKGIHFRVTTKQPVADTDDK-----YAEMYEVHVVPMMPAVVLFNSILAIG 769
TRIAE\_CS42\_2DL\_TGACv RNEQFFMIGSVTAYPTAVLHMVNNLLTKKGIHFRVTTKQPVADTDDK-----YAEMYEVHVVPMMPAVVLFNSILAIG 762
TRIAE\_CS42\_2BS\_TGACv RNEQFFMIGSVTAYPTAVLHMVNNLLTKKGIHFRVTTKQPVADTDDK-----YAEMYEVHVVPMMPAVVLFNSILAIG 754
TRIAE\_CS42\_2DS\_TGACv RNEQFFMIGSVTAYPTAVLHMVNNLLTKKGIHFRVTTKQPVADTDDK-----YAEMYEVHVVPMMPAVVLFNSILAIG 753
TRIAE\_CS42\_7AL\_TGACv RNEQFFMIGSVTAYPTAVLHMVNNLLTKKGIHFRVTTKQPVADTDDK-----YAEMYEVHVVPMMPAVVLFNSILAIG 753
TRIAE\_CS42\_7DL\_TGACv RNEQFFMIGSVTAYPTAVLHMVNNLLTKKGIHFRVTTKQPVADTDDK-----YAEMYEVHVVPMMPAVVLFNSILAIG 751
TRIAE\_CS42\_7BL\_TGACv RNEQFFMIGSVTAYPTAVLHMVNNLLTKKGIHFRVTTKQPVADTDDK-----YAEMYEVHVVPMMPAVVLFNSILAIG 614
TRIAE\_CS42\_U\_TGACv1 RNEQFYIIIGTGVYPMAMHLIILRLSLGKIGVYFRLTSKQTEACSRDK-----FADLYDMRWVPMPLIPTTVLIANVGAIG 774
TRIAE\_CS42\_1BS\_TGACv RNEQFYIIIGTGVYPMAMHLIILRLSLGKIGVYFRLTSKQTEACSRDK-----FADLYDMRWVPMPLIPTTVLIANVGAIG 773
TRIAE\_CS42\_2AS\_TGACv RNEQFYIIIGTGVYPMAMHLIILRLSLGKIGVYFRLTSKQTEACSRDK-----FADLYDMRWVPMPLIPTTVLIANVGAIG 780
TRIAE\_CS42\_2AS\_TGACv RNEQFYIIIGTGVYPMAMHLIILRLSLGKIGVYFRLTSKQTEACSRDK-----FADLYDMRWVPMPLIPTTVLIANVGAIG 779
TRIAE\_CS42\_2DS\_TGACv RNEQFYIIIGTGVYPMAMHLIILRLSLGKIGVYFRLTSKQTEACSRDK-----FADLYDMRWVPMPLIPTTVLIANVGAIG 777
TRIAE\_CS42\_2BS\_TGACv RNEQFYIIIGTGVYPMAMHLIILRLSLGKIGVYFRLTSKQTEACSRDK-----FADLYDMRWVPMPLIPTTVLIANVGAIG 606
TRIAE\_CS42\_2DS\_TGACv RNEQFYIIIGTGVYPMAMHLIILRLSLGKIGVYFRLTSKQTEACSRDK-----FADLYDMRWVPMPLIPTTVLIANVGAIG 606
TRIAE\_CS42\_2AS\_TGACv RNEQFYIIIGTGVYPMAMHLIILRLSLGKIGVYFRLTSKQTEACSRDK-----FADLYDMRWVPMPLIPTTVLIANVGAIG 802
TRIAE\_CS42\_7AL\_TGACv RNEQFYIIIGTGVYPMAMHLIILRLSLGKIGVYFRLTSKQTEACSRDK-----FADLYDMRWVPMPLIPTTVLIANVGAIG 802
TRIAE\_CS42\_7DL\_TGACv RNEQFYIIIGTGVYPMAMHLIILRLSLGKIGVYFRLTSKQTEACSRDK-----FADLYDMRWVPMPLIPTTVLIANVGAIG 401
TRIAE\_CS42\_7BL\_TGACv RNEQFYIIIGTGVYPMAMHLIILRLSLGKIGVYFRLTSKQTEACSRDK-----FADLYDMRWVPMPLIPTTVLIANVGAIG 844

TRIAE\_CS42\_5DL\_TGACv AAVQEGRWK-----GPAAVLAMAFNAWVVHLPFALGIMGRWSKTLSPLLLLVVGFTVLSLFCVFLHHLML----- 808
TRIAE\_CS42\_5AL\_TGACv AAVQEGRWK-----GPAAVLAMAFNAWVVHLPFALGIMGRWSKTLSPLLLLVVGFTVLSLFCVFLHHLML----- 807
TRIAE\_CS42\_5BL\_TGACv SSGTRGTVEE-----RPRGGARDGVQRVGGGASPPVRPWSHGPLEQDVEPPALARRSVHSSITMFCPPAYALIWLLF 814
TRIAE\_CS42\_2AS\_TGACv VAIGKSVLYMGTWSAAQRRHGALGLLFLNLMVLLYPFALAIIGRWAKRTGILFILLPIAFLSTALMYIGHTFLHFFFP 874
TRIAE\_CS42\_2BS\_TGACv VAIGKSVLYMGTWSAAQRRHGALGLLFLNLMVLLYPFALAIIGRWAKRTGILFILLPIAFLSTALMYIGHTFLHFFFP 873
TRIAE\_CS42\_2DS\_TGACv VAIGKSVLYMGTWSAAQRRHGALGLLFLNLMVLLYPFALAIIGRWAKRTGILFILLPIAFLSTALMYIGHTFLHFFFP 866
TRIAE\_CS42\_2AS\_TGACv VAMGKTIIVYMGAWTIAQKTHAALGLLFLNLMVLLYPFALAIIGRWAKRTGILFILLPIAFLSTALMYIGHTFLHFFFP 846
TRIAE\_CS42\_2DS\_TGACv VAMGKTIIVYMGAWTIAQKTHAALGLLFLNLMVLLYPFALAIIGRWAKRTGILFILLPIAFLSTALMYIGHTFLHFFFP 846
TRIAE\_CS42\_2BS\_TGACv VAMGKTIIVYMGAWTIAQKTHAALGLLFLNLMVLLYPFALAIIGRWAKRTGILFILLPIAFLSTALMYIGHTFLHFFFP 850
TRIAE\_CS42\_2DL\_TGACv AAIKKAATWG--FFTDEARHALLGMVFNMGILVLLYPFALGIMGKWRKPIILFIVLVAISVGLLYVTLHAPYTGWS 844
TRIAE\_CS42\_2BL\_TGACv AAIKKAATWG--FFTDEARHALLGMVFNMGILVLLYPFALGIMGKWRKPIILFIVLVAISVGLLYVTLHAPYTGWS 845
TRIAE\_CS42\_2AL\_TGACv AAIKKAATWG--FFTDEARHALLGMVFNMGILVLLYPFALGIMGKWRKPIILFIVLVAISVGLLYVTLHAPYTGWS 847
TRIAE\_CS42\_2DL\_TGACv AAIKKAATWG--FFTDEARHALLGMVFNMGILVLLYPFALGIMGKWRKPIILFIVLVAISVGLLYVTLHAPYTGWS 840
TRIAE\_CS42\_2BS\_TGACv AAIKKAATWG--FFTDEARHALLGMVFNMGILVLLYPFALGIMGKWRKPIILFIVLVAISVGLLYVTLHAPYTGWS 754
TRIAE\_CS42\_2DS\_TGACv SRPSWCSS----- 783
TRIAE\_CS42\_7AL\_TGACv AAIKKAATWG--FFTQAWHAVLGMVFNMGILVLLYPFALGIMGQWKRKPIILVLMVMAIGTVGLLYVTLQDGHMSF 831
TRIAE\_CS42\_7DL\_TGACv AAIKKAATWG--FFTQAWHAVLGMVFNMGILVLLYPFALGIMGQWKRKPIILVLMVMAIGTVGLLYVTLQDGHMSF 829
TRIAE\_CS42\_7BL\_TGACv AAIKKAATWG--FFTQAWHAVLGMVFNMGILVLLYPFALGIMGQWKRKPIILVLMVMAIGTVGLLYVTLQDGHMSF 614
TRIAE\_CS42\_U\_TGACv1 AAAGKAIAGR--WSAAQVAGAASGLVFNVMWLLLLYPFALGIMGRWSKRPYILFIVLVAATAASMYVALAGSLPYLHS 852
TRIAE\_CS42\_1BS\_TGACv AAAGKAIAGR--WSAAQVAGAASGLVFNVMWLLLLYPFALGIMGRWSKRPYILFIVLVAATAASMYVALAGSLPYLHS 851
TRIAE\_CS42\_2AS\_TGACv AAVGKAITWG--WSAGQVVEAASGLMNFVWLLLMFYFPALGIVGRWKRKPYVLFAMFVAFAAIAAVVAVQAALAGNLP 858
TRIAE\_CS42\_2BS\_TGACv AAVGKAITWG--WSAGQVVEAASGLMNFVWLLLMFYFPALGIVGRWKRKPYVLFAMFVAFAAIAAVVAVQAALAGNLP 857
TRIAE\_CS42\_2DS\_TGACv AAVGKAITWG--WSAGQVVEAASGLMNFVWLLLMFYFPALGIVGRWKRKPYVLFAMFVAFAAIAAVVAVQAALAGNLP 855
TRIAE\_CS42\_2BS\_TGACv ASIGKAIVGG--WSLMQADAGLGLVFNWLLVLLYPFALGIMGRWSKRPYILFIVLVAIFLIALVDIAIQAMRSGFVR 684
TRIAE\_CS42\_2DS\_TGACv ASIGKAIVGG--WSLMQADAGLGLVFNWLLVLLYPFALGIMGRWSKRPYILFIVLVAIFLIALVDIAIQAMRSGFVR 684
TRIAE\_CS42\_2AS\_TGACv ASIGKAIVGG--WSLMQADAGLGLVFNWLLVLLYPFALGIMGRWSKRPYILFIVLVAIFLIALVDIAIQAMRSGFVR 880

TRIAE\_CS42\_7AL\_TGACv VAFAKVLDGEW----THWLKVAGGVFFNFVWLFHLYPFPAKGILGKHGKTPVVVVLVWVAFTFVITAVLYINIPHMSSGGK 878  
TRIAE\_CS42\_7DL\_TGACv VAFAKVLDGEW----THWLKVAGGVFFNFVWLFHLYPFPAKGILGKHGKTPVVVVLVWVAFTFVITAVLYINIPHMSSGGK 477  
TRIAE\_CS42\_7BL\_TGACv VAFAKVLDGEW----THWLKVAGGVFFNFVWLFHLYPFPAKGILGKHGKTPVVVVLVWVAFTFVITAVLYINIPHMSSGGK 920

TRIAE\_CS42\_5DL\_TGACv ----- 808  
TRIAE\_CS42\_5AL\_TGACv ----- 807  
TRIAE\_CS42\_5BL\_TGACv G----- 815  
TRIAE\_CS42\_2AS\_TGACv SMLI----- 878  
TRIAE\_CS42\_2BS\_TGACv SMLI----- 877  
TRIAE\_CS42\_2DS\_TGACv SMLI----- 870  
TRIAE\_CS42\_2AS\_TGACv F----- 847  
TRIAE\_CS42\_2DS\_TGACv F----- 847  
TRIAE\_CS42\_2BS\_TGACv F----- 851  
TRIAE\_CS42\_2DL\_TGACv QVAVSLGKASLTGPSGSG--- 862  
TRIAE\_CS42\_2BL\_TGACv QVAVSLGKASLTGPSGSG--- 663  
TRIAE\_CS42\_2AL\_TGACv QVAVSLGKASLTGPSGSG--- 865  
TRIAE\_CS42\_2DL\_TGACv TFLSW----- 845  
TRIAE\_CS42\_2BS\_TGACv ----- 754  
TRIAE\_CS42\_2DS\_TGACv ----- 783  
TRIAE\_CS42\_7AL\_TGACv LTRPSG----- 837  
TRIAE\_CS42\_7DL\_TGACv LTRPSG----- 835  
TRIAE\_CS42\_7BL\_TGACv ----- 614  
TRIAE\_CS42\_U\_TGACv1 GIKLV----- 857  
TRIAE\_CS42\_1BS\_TGACv GIKLV----- 856  
TRIAE\_CS42\_2AS\_TGACv YFQLGHWSIGGAVSLPSRRV- 878  
TRIAE\_CS42\_2BS\_TGACv YFQLGHWSIGGAVSLPSRRV- 877  
TRIAE\_CS42\_2DS\_TGACv YFQLGHRSIGGAVSLASRRV- 875  
TRIAE\_CS42\_2BS\_TGACv FHFKSSGGATFPTSWSGL---- 701  
TRIAE\_CS42\_2DS\_TGACv FHFKSSGGATFPTSWSGL---- 701  
TRIAE\_CS42\_2AS\_TGACv FHFKSSGGATFPTSWSGL---- 897  
TRIAE\_CS42\_7AL\_TGACv HTTVHGHGKKFVDAGYYNWP 899  
TRIAE\_CS42\_7DL\_TGACv HTTVHGHGKKFVDAGYYNWP 498  
TRIAE\_CS42\_7BL\_TGACv HTTVHGHGKKFVDAGYYNWP 941

**Fig. S\_2F: *CslH* & *CslJ* subfamilies.**

| S.No | Gene name with number of splice variants ( <i>CslH</i> ) | No. of amino acids (aa) |
|------|----------------------------------------------------------|-------------------------|
| 1    | TRIAE_CS42_3DS_TGACv1_271739_AA0907200.1                 | 714 aa                  |
| 2    | TRIAE_CS42_3AS_TGACv1_212952_AA0704280.1                 | 331 aa                  |
| 3    | TRIAE_CS42_3B_TGACv1_222234_AA0760340.1                  | 751 aa                  |
| 4    | TRIAE_CS42_3B_TGACv1_221049_AA0728260.1                  | 458 aa                  |
| 5    | TRIAE_CS42_3DS_TGACv1_273502_AA0931770.1                 | 579 aa                  |
| 6    | TRIAE_CS42_2AL_TGACv1_094351_AA0296300.3_3_SPLICE        | 752 aa                  |
| 7    | TRIAE_CS42_2DL_TGACv1_158387_AA0517170.1                 | 752 aa                  |
| 8    | TRIAE_CS42_2BL_TGACv1_129372_AA0380770.1                 | 799 aa                  |

| S.No | Gene name with number of splice variants ( <i>CslJ</i> ) | No. of amino acids (aa) |
|------|----------------------------------------------------------|-------------------------|
| 1    | TRIAE_CS42_3DS_TGACv1_272297_AA0918580.1                 | 738 aa                  |
| 2    | TRIAE_CS42_3AS_TGACv1_210908_AA0681280.2_2_SPLICE        | 766 aa                  |
| 3    | TRIAE_CS42_3B_TGACv1_221705_AA0747940.1                  | 734 aa                  |
| 4    | TRIAE_CS42_3DS_TGACv1_272756_AA0924850.1_2_SPLICE        | 734 aa                  |

TRIAE\_CS42\_2AL\_TGACv1 -----MAGGKKLHERVALGR TAWMLAD FVILL LLL LALV 33  
 TRIAE\_CS42\_2BL\_TGACv1 MHRGEDSLSGLYKCTLAFVACGCGWVLLASLLLVASVLSATAMAGGKKLQERVALGRSAWMLAD FVILFVLV LALV 80  
 TRIAE\_CS42\_2DL\_TGACv1 -----MAGGKKLQERVALGR TAWMLAD FVILL LLL LALV 33  
 TRIAE\_CS42\_3AS\_TGACv1 ----- 0  
 TRIAE\_CS42\_3B\_TGACv1 -----MSSAMK LQERVSVPRTAWKLADIFILCLLF 30  
 TRIAE\_CS42\_3DS\_TGACv1 -----MSSAMK LQERVIVPRTAWKLADIFILCLLFALL 33  
 TRIAE\_CS42\_3B\_TGACv1 -----MSSAMK LQERTVPRTAWKLADIFILCLLLVLL 33  
 TRIAE\_CS42\_3DS\_TGACv1 -----MGSAMK LQERVILPRTAWKLADIFILCLLFALL 33

TRIAE\_CS42\_2AL\_TGACv1 ARRAASLGE--RGGTWLAALVCEAWFAFVWILNMNGKWSVPRFDTYPENLSHRLEELPAVDMFVTTADPALEPPLITVNT 111  
 TRIAE\_CS42\_2BL\_TGACv1 ARRAASLGE--RGGTWLAALVCEAWFAFVWILNMNGKWSVPRFDTYPENLSHRMEELPAVDMFVTTADPALEPPLITVNT 158  
 TRIAE\_CS42\_2DL\_TGACv1 ARRAASLGE--RGGTWLAALVCEAWFAFVWILNMNGKWSVPRFDTYPENLSHRMEELPAVDMFVTTADPALEPPLITVNT 111  
 TRIAE\_CS42\_3AS\_TGACv1 ----- 0  
 TRIAE\_CS42\_3B\_TGACv1 ALLSCRVASLREGGASVAALVCEAWFTFVWILNMNIKWNVPRFNTYPENLSQRTDELPAVDMVLTADPELEPPLMTVNT 110  
 TRIAE\_CS42\_3DS\_TGACv1 SCRVLSLGEGGAGAASVAALVCEAWFTFVWILNMNIKWNVPRFHTYPENLSQRMDELPAVDMVLTADPELEPPLMTVNT 113  
 TRIAE\_CS42\_3B\_TGACv1 SCRVASLGEAGAG--AAALVCEAWFTFVWILNMNIKWNVPRFHTYPENLSQRMDELPAVDMVLTADPELEPPLMTVNT 110  
 TRIAE\_CS42\_3DS\_TGACv1 SCRVASLGGGAGAASVAALVCEAWFTFVWILNMNIKWNVPRFHTYPENLSQRMDELPAVDMVLTADPELEPPLMTVNT 113

TRIAE\_CS42\_2AL\_TGACv1 VLSLLAIDYDPVVKLACYVSDDGCSPTVTCYALREAAKFASLWVDFCKRHDVGVRAFPFMYFSSAPEVGTGTADHDFLESWA 191  
 TRIAE\_CS42\_2BL\_TGACv1 VLSLLAIDYDPVVKLACYVSDDGCSPLTCYSLREAAKFASLWVDFCKRHDVGVRAFPFMYFSSAPEVGTGTADHDFLESWA 238  
 TRIAE\_CS42\_2DL\_TGACv1 VLSLLAIDYDPVGRKACYVSDDGCSPTVTCYALREAAKFAGLWVDFCKRHDVGVRAFPFMYFSSAPEVGNGTVDHDFLESWA 191  
 TRIAE\_CS42\_3AS\_TGACv1 ----- 0  
 TRIAE\_CS42\_3B\_TGACv1 VLSLLAIDYDPVDK LACYVSDDGCSPTVTCYALREAAGFARLWVDFCKRHGVGVRAFPFMYFAS--SRPELAG--DWTFI 186  
 TRIAE\_CS42\_3DS\_TGACv1 VLSLLAIDYDPVDK LACYVSDDGCSPTVTCYALHEAARFAGLWVDFCKRHGVGVRAFPFMYFAS--RPELAGDNFSDWT 191  
 TRIAE\_CS42\_3B\_TGACv1 VLSLLAIDYDPVDK LACYVSDDGCSPTVTCYALREAAGFARLWVDFCKRHGVGVRAFPFIYFAS--RPELAGDKFSDDWI 189  
 TRIAE\_CS42\_3DS\_TGACv1 VLSLLAIDYDPVDK LACYVSDDGCSPATCYALREAAWFARLWVDFCKRHDVVRVRAPIIYFAS--RLEPELAGDTFSDWT 191

TRIAE\_CS42\_2AL\_TGACv1 LMKTEYEK LARSRIENADEVSI LR-DGGEEFAEFIDAEGRNHPTIVKVLWDNSKSK-AGEGPHLVYLSREKSPRHRHNFK 269  
 TRIAE\_CS42\_2BL\_TGACv1 LMKSEYEK LARSRIENADEVSI LR-DGGDEF AEFIDAEGRNHPTIVKVLWDNSKSK-TGEGPHLVYLSREKSPRHRHNFK 316  
 TRIAE\_CS42\_2DL\_TGACv1 LMKSQYEK LARSRIENADEGTIMR-DGGDEF AEFIDAEGRNHPTIVKVLWDNSKSK-AGEEFP HLVYLSREKSPRHRHNFK 269  
 TRIAE\_CS42\_3AS\_TGACv1 ----- 0  
 TRIAE\_CS42\_3B\_TGACv1 KSEYDKLVSRIESADEGSLLRHDDADFEFMEAKRGDHPAIVKVLWDNSKSSRTGSGDGFNLVYVVSREKTRKHDDHHYK 266  
 TRIAE\_CS42\_3DS\_TGACv1 FIKSEYDKLVSRIESADEGSLLRDDADFEFMEAKRGDHPAIVKVLWDNSKSSRTGEGFPNLVYVVSREKSRKHDDHHYK 271  
 TRIAE\_CS42\_3B\_TGACv1 FIKSEYDKLVSLIESADEASLLRHHDAGEFTEFKGAECDHPAIVKVLWDNSKSSGTGEGFPNLVYVVSREKSRKHDDHHYK 269  
 TRIAE\_CS42\_3DS\_TGACv1 FIKSEYDKLVSRIESADEGSLLRHDDADFEFMEAEARTDHPAIVKVLWDNSKSSRTGEAFPHLVYVVSSEKSRKHDDHHYK 271

TRIAE\_CS42\_2AL\_TGACv1 AGAMNVLTRVSAVMTNAPIMLNDCD MFANNPQVALHAMCLLLGFDD EIHSGFVQAPQK FYGGLKDDPFGNQMVITTKI 349  
 TRIAE\_CS42\_2BL\_TGACv1 AGAMNVLTRVSAVMTNAPIMLNDCD MFANNPQVALHAMCLLLGFDD EIHSGFVQAPQK FYGGLKDDPFGNQMVITTKI 396  
 TRIAE\_CS42\_2DL\_TGACv1 AGAMNVLTRVSAVMTNAPIMLNDCD MFANNPQVALHAMCLLLGFDD EIHSGFVQAPQK FYGGLKDDPFGNQMVITTKI 349  
 TRIAE\_CS42\_3AS\_TGACv1 ----- 0  
 TRIAE\_CS42\_3B\_TGACv1 AGAMNVLARVSAVMTNAP IILNDCD MFVNNPQVVLHAMCLLLGFDD ETCSGFVQVPQR FYAKLDDPFGNQIEVLRK 346  
 TRIAE\_CS42\_3DS\_TGACv1 AGAMNVLARVSAVMTNAP IILNDCD MFVNNPQVVLHAMCLLLGFDD ETCSGFVQVPQR FYGKLDKDDPFGNQMEVLRK 351  
 TRIAE\_CS42\_3B\_TGACv1 AGAMNVLARVSAVMTNAP IILNDCD MFVNNPQVVLHATCLLLGFDD ETCSGFVQVPQR FYGKLDKDDPFGNQMEVLR-- 347  
 TRIAE\_CS42\_3DS\_TGACv1 AGAMNVLARVSAVMTNAP IILNDCD MFVNNPQVVLHAMCLLLGFDD ETCSGFVQVPQR FYGKLDKDDPFGNQMEVLRK 351

TRIAE\_CS42\_2AL\_TGACv1 GGGLAGIQGTFYGGTGCFHRRKVIYGMPPPD--TVKHETRGS PSYKELQAKFGSSKELIESSRNIISGDL LARPTVDISS 427  
 TRIAE\_CS42\_2BL\_TGACv1 GGGLAGIQGTFYGGTGCFHRRKVIYGMPPPD--TVKHETRGS PSYKELQAKFGSSKELIESSRNIISGDL LARPTVDISS 474  
 TRIAE\_CS42\_2DL\_TGACv1 GGGLAGIQGMFYGGTGCFHRRKVIYGVPPPD--TVKHEMKGSPSYKELQAKFGSSKELIESSRNIISGDL LARPTVDISS 427  
 TRIAE\_CS42\_3AS\_TGACv1 -----MIDISS 6  
 TRIAE\_CS42\_3B\_TGACv1 LGGLSGLQGIYYLGTGCFHRRKVIYGVAPPFAAVKHERQGS LTYEDLRTKFGASVELAESARNIYSREIPLKPMIDISS 426

TRIAE\_CS42\_3DS\_TGAcv FGGLAGLQGIYYLGMGCFHRRKIIYGVAPSSAAIKHEREGSRSYEDLRTKFGASVELVESARNIYSGEIIPSPMIDISS 431  
TRIAE\_CS42\_3B\_TGAcv1 -----LSYEDLLTKFGASVELVESARNIYSVEIPPKPMIDITS 385  
TRIAE\_CS42\_3DS\_TGAcv LGGLSGLQGIYFLGTGCFHRRKIIYGVAPSSFAAVKHEREGSLSYEDLRTKFGASVELVESARNIYSREIPPKPMVNISS 431

TRIAE\_CS42\_2AL\_TGAcv RVE**MAKOV**GD**CNYE**AGT**GWGOE**IGWVYGSMTEDILTGQRIQAAGWESALLDTPPAFLGCAPTGGPASL**QFKRW**ATGLL 507  
TRIAE\_CS42\_2BL\_TGAcv RVE**MAKOV**GD**CNYE**AGT**GWGOE**IGWVYGSMTEDILTGQRIQAAGWESALLDTPPAFLGCAPTGGPASL**QFKRW**ATGLL 554  
TRIAE\_CS42\_2DL\_TGAcv RVE**MAKOV**GD**CNYE**AGT**GWGOE**IGWVYGSMTEDILTLGRIHAAGWESALLDTEPPAFLGCAPTGGPASL**QFKRW**ATGLL 507  
TRIAE\_CS42\_3AS\_TGAcv R**TOVAKOV**SS**CNYE**TG**HWGOE**IGWSYGSMAEDILTGQRIHSSGWKSTLLDTPPAFLGCAPTGGPASL**QYKRW**ATGLL 86  
TRIAE\_CS42\_3B\_TGAcv1 R**TOVAKOV**SS**CNYE**TG**HWGOE**IGWSYGSMAEDILTGQRIHSSGWKSTSPDTPPAFLGCAPTGGPASL**QYKRW**ATGLL 506  
TRIAE\_CS42\_3DS\_TGAcv R**TOVAKOV**SS**CNYE**TG**HWGOE**IGWSYGSMAEDILTGQRIHSSGWKSTLLDTPPAFLGCAPTGGPASL**QYKRW**ATGLL 511  
TRIAE\_CS42\_3B\_TGAcv1 R**TOVAKOV**SS**CNYE**TG**HWGOE**IGWSYGSMAEDILTGQRIHSSGWKSTLLDTPPAFLGCAPTGGPASL**QYKRW**ATGLL 511  
TRIAE\_CS42\_3DS\_TGAcv C**TOVAKOV**SS**CNYE**TG**HWGOE**IGWSYGSMAEDILTGQRIHSSGWKSTLLDTPPAFLGCAPTGGPASL**QYKRW**ATGVL 511

TRIAE\_CS42\_2AL\_TGAcv EILSRNSPILGTIFRRL**LOLROCLAY**IVDPAWV**RAPE**ELCYALLG**P**FCLLTNQSFLPTASDEGFHIIPAALFLTYNIYHL 587  
TRIAE\_CS42\_2BL\_TGAcv EILSRNSPILGTIFRRL**LOLROCLAY**IVNPAWV**RAPE**EMCYALLG**P**FCLLTNQSFLPTASDEGFRIIPAAFLFLSYHYVHL 634  
TRIAE\_CS42\_2DL\_TGAcv EILSQNSPILGTIFRRL**LOLROCLAY**IIVEAWPV**RAPE**ELCYALLG**P**FCLLTNQSFLPTASDEGFRIIPAAFLFLCHIYHL 587  
TRIAE\_CS42\_3AS\_TGAcv EILGQNSPILATIFRRL**LOLROCLAY**IVFYVWSM**RAPE**ELCYALLG**P**FCLFRNQSFLKASNHGFSIQLALFLSYNIYNF 166  
TRIAE\_CS42\_3B\_TGAcv1 EILGPNTPIATIFRRL**LOLROCLAY**IVFYVWSM**RAPE**ELCYALLG**P**FCLFRNHSFLKASNHGFSIQLALFLSYNIYNF 586  
TRIAE\_CS42\_3DS\_TGAcv EILGQNSPILMATIFRRL**LOLROCLAY**IVFYVWSM**RAPE**ELCYALLG**P**FCLFRNQSFLKASNHGFSIQLALFLSYNIYNF 591  
TRIAE\_CS42\_3B\_TGAcv1 -FS**QLALFLSYNIYNFVEYKE**CGLSARTWNNM**MRINLL**LAPCFD----- 458  
TRIAE\_CS42\_3DS\_TGAcv EILGQNSPILATIFRRL**LOLROCLAY**IVFYVWSM**RAPE**ELCYALLG**P**FCLFRNHSFLKQHTMVSASN----- 579

TRIAE\_CS42\_2AL\_TGAcv MEYKECGLSVRAWNNHRMQRITSAWLLAFLTVILKTLGLSETVFEVTRKESSTSSDGGAGTDDADPGLFTFDSAPVF 667  
TRIAE\_CS42\_2BL\_TGAcv MEYKECGLSVRAWNNHRMQRITSAWLLAFLTVILKTLGLSETVFEVTRKESSTSSDGGGTDEADTGLFTFDSAPVF 714  
TRIAE\_CS42\_2DL\_TGAcv MEYKECGLSVRAWNNHRMQRITSAWLLAFLTVILKTLGLSETVFEVTRKESSTSSDGGAGTDEADPGLFTFDSAPVF 667  
TRIAE\_CS42\_3AS\_TGAcv VEYMDGCLSAWNNHRMQRIVSLSWLLAFLSVVLKTLGLSKTVFEVTRKDKST-SDGDPSTHETDLGWFTFDSLVF 245  
TRIAE\_CS42\_3B\_TGAcv1 VEYMECGLSARTWNNHRMQRIVSLSWLLAFLSVVLKTLGLSKTVFEVTRKDKST-SDGDPSTHETDLGWFTFDSVPVF 665  
TRIAE\_CS42\_3DS\_TGAcv VEYMECGLSARTWNNHRMQRIVSLSWLLDFLSVVLKTLGLSKTVFEVTRKDKST-SDGDPSTHETDLGWFTFDSVPVF 670  
TRIAE\_CS42\_3B\_TGAcv1 ----- 458  
TRIAE\_CS42\_3DS\_TGAcv ----- 579

TRIAE\_CS42\_2AL\_TGAcv IPVTALSMLNIVALVAWRAVVTAG-VHGGPGVGEFVCCGWMVLCFVFPVGRGLVSSGKYGIPWSVRVKAGLIVAAVF 746  
TRIAE\_CS42\_2BL\_TGAcv IPVTALSMLNIVALVAWRAVVTAG-VHGGPGVGEFVCCGWMVLCFVFPVGRGLVSSGKYGIPWSVRVKAGLIVAAVF 793  
TRIAE\_CS42\_2DL\_TGAcv IPVTALSMLNIVALVAWRAVVTAG-VHGGPGVGEFVCCGWMVLCFVFPVGRGLVSSGKYGIPWSVRVKAGLIVAAVF 746  
TRIAE\_CS42\_3AS\_TGAcv IPVTTVALLNIAATIAIGVWRHAI**FWMITGNH**DCQ**NI**GE**FL**CCGLMILYFWPF**IKGLVGRGRYGI**PWN**VKL**KAWVIVVAF 325  
TRIAE\_CS42\_3B\_TGAcv1 IPMTAVAILNI**VTTIAIGVWRHAI**F**WMITGNH**DCQ**NI**GE**FL**CCGLMILYFWPF**IKGLVGRGRYGI**PWN**VKL**KAWVIVVAF 745  
TRIAE\_CS42\_3DS\_TGAcv ILVTTVALLNIAATIAIGVWRHAI**FWMITGNH**DCQ**NI**GE**FL**CCGLMILYFWPF**IKGLVGRGRYGI**PWN**VKL**KAWVIVVAF 714  
TRIAE\_CS42\_3B\_TGAcv1 ----- 458  
TRIAE\_CS42\_3DS\_TGAcv ----- 579

TRIAE\_CS42\_2AL\_TGAcv HLCTRN 752  
TRIAE\_CS42\_2BL\_TGAcv HLCTRN 799  
TRIAE\_CS42\_2DL\_TGAcv HICTRN 752  
TRIAE\_CS42\_3AS\_TGAcv YFCRGD 331  
TRIAE\_CS42\_3B\_TGAcv1 YFCRGD 751  
TRIAE\_CS42\_3DS\_TGAcv ----- 714  
TRIAE\_CS42\_3B\_TGAcv1 ----- 458  
TRIAE\_CS42\_3DS\_TGAcv ----- 579

Color Align Conservation results

TRIAE\_CS42\_3B\_TGAcv1 **MAAR**PSQDAP**LO**LHTV**VD**Q**PH**ATVNR**LAA**LHVALAAAIAH**RG**AHV**MLAA**DLVLLFLWALSQAPMWRPVSR**RA**FP**SRL** 80  
TRIAE\_CS42\_3DS\_TGAcv **MATK**PSQDAP**PL**LHTV**VD**Q**PH**ATVNR**LAA**AVHLALGAAAIAH**RG**AHV**MLAA**DLVLLFLWALSQAPMWRPVSR**RA**FP**SRL** 80  
TRIAE\_CS42\_3AS\_TGAcv **MAAR**PSQDAP**LO**LHTV**VD**Q**PH**ATVNR**LAA**LHVALAAAIAH**RG**AHV**MLAA**DLVLLFLWALSQAPMWRPVSR**RA**FP**SRL** 80  
TRIAE\_CS42\_3DS\_TGAcv **MAAR**PSQDAP**LO**LHTV**VD**Q**PH**ATVNR**LAA**LHVALAAAIAH**RG**AHV**MLAA**DLVLLFLWALSQAPMWRPVSR**RA**FP**SRL** 80

TRIAE\_CS42\_3B\_TGAcv1 **SRA**ALPAVDVMVVTAD**PK**E**PA**AKVMNTVVSAMAL**NY**PGGRLSV**YLS**DIAGSPRTLLAARKAYA**F**ARAWVPFCRKYGVR**C** 160  
TRIAE\_CS42\_3DS\_TGAcv **SRA**ALPAVDVMVVTAD**PK**E**PA**AKVMNTVVSAMAL**NY**PGGRLSV**YLS**DIAGSPRTLLAARKAYA**F**ARAWVPFCRKYGVR**C** 160  
TRIAE\_CS42\_3AS\_TGAcv **SRA**ALPAVDVMVVTAD**PK**E**PA**AKVMNTVVSAMAL**NY**PGGRLSV**YLS**DIAGSPRTLLAARKAYA**F**ARAWVPFCRKYGVR**C** 160  
TRIAE\_CS42\_3DS\_TGAcv **SRA**ALPAVDVMVVTAD**PK**E**PA**AKVMNTVVSAMAL**NY**PGGRLSV**YLS**DIAGSPRTLLAARKAYA**F**ARAWVPFCRKYGVR**C** 160

TRIAE\_CS42\_3B\_TGAcv1 **PCPDR**FFAGD**Q**DI**DG**HH**R**CE**LD**DDRLR**IK**MY**ET**FE**EG**VE**VM**SDA**LS**Q**SW**TKADHD**AH**VE**I**ITGDE**-**Q**D**SS**NS**NS**G** 239  
TRIAE\_CS42\_3DS\_TGAcv **PCPDR**FFAGD**Q**DI**DG**HH**R**CE**LD**DDRLR**IK**MY**ET**FE**EG**VE**VM**SDA**LS**Q**SW**TKADHD**AH**VE**I**ITGDE**-**Q**D**SS**NS**NS**G** 239  
TRIAE\_CS42\_3AS\_TGAcv **PCPDR**FFAGD**Q**DI**DG**HH**R**CE**LD**DDRLR**IK**MY**ET**FE**EG**VE**VM**SDA**LS**Q**SW**TKADHD**AH**VE**I**ITGDE**-**Q**D**SS**NS**NS**G** 240  
TRIAE\_CS42\_3DS\_TGAcv **PCPDR**FFAGD**Q**DI**DG**HH**R**CE**LD**DDRLR**IK**MY**ET**FE**EG**VE**VM**SDA**LS**Q**SW**TKADHD**AH**VE**I**ITGDE**-**Q**D**SS**NS**NS**G** 233

TRIAE\_CS42\_3B\_TGAcv1 **DG**E**DE**D**ED**AT**PL**LVVYSR**CK**RRSS**TH**HF**K**AGAL**NV**LLRVSS**LS**NS**SPY**VMV**LD**CD**Y**CNSR**SS**LEAMCFHLDGRRR**AD**LA 319  
TRIAE\_CS42\_3DS\_TGAcv **DG**E**DE**D**ED**AT**PL**LVVYSR**CK**RRSS**TH**HF**K**AGAL**NV**LLRVSS**LS**NS**SPY**VMV**LD**CD**Y**CNSR**SS**LEAMCFHLDGRRR**AD**LA 319  
TRIAE\_CS42\_3AS\_TGAcv **DG**E**DE**D**ED**AT**PL**LVVYSR**CK**RRSS**TH**HF**K**AGAL**NV**LLRVSS**LS**NS**SPY**VMV**LD**CD**Y**CNSR**SS**LEAMCFHLDGRRR**AD**LA 320  
TRIAE\_CS42\_3DS\_TGAcv **DG**E**DE**D**ED**AT**PL**LVVYSR**CK**RRSS**TH**HF**K**AGAL**NV**LLRVSS**LS**NS**SPY**VMV**LD**CD**Y**CNSR**SS**LEAMCFHLDGRRR**AD**LA 313

TRIAE\_CS42\_3B\_TGAcv1 **FVQ**FP**Q**MFH**NLS**SSDIYAN**EL**RS**IF**WT-----RWKGLDGLR**GP**ILSGT**GFC**RR**DA**I 371  
TRIAE\_CS42\_3DS\_TGAcv **FVQ**FP**Q**MFH**NLS**SSDIYAN**EL**RS**IF**WT-----RWKGLDGLR**GP**ILSGT**GFC**RR**DA**I 371  
TRIAE\_CS42\_3AS\_TGAcv **FVQ**FP**Q**MFH**NLS**SSDIYAN**EL**RS**IF**W**R**KK**T**NR**PC**IAS**VI**SE**FS**SN**L**GAC**MV**Q**T**R**W**KGLDGLR**GP**ILSGT**GFC**RR**DA**V 400  
TRIAE\_CS42\_3DS\_TGAcv **FVQ**FP**Q**MFH**NLS**SSDIYAN**EL**RS**IF**W**A**G**P**TG-----LRDAV**ERR**GR**PP**GP**IL**SGT**GFC**RR**DA**V 372

TRIAE\_CS42\_3B\_TGAcv1 **YGA**L**P**ASS**Q**D**Q**-**F**SGVE**V**EL**K**RR**F**GV**S**NG**H**IAS**L**RR**S**GT**G**ST**I**V**A**R**D**A**L**P**---**Q**D**A**E**L**V**A**S**C**D**Y**E**T**G**T**E**W**E**G**V**G**F**L**Y**Q 447  
TRIAE\_CS42\_3DS\_TGAcv **YGA**L**P**ASS**Q**D**Q**-**F**SGVE**V**EL**K**RR**F**GV**S**NG**H**IAS**L**RR**S**GT**G**ST**I**V**A**R**D**A**L**P**---**Q**D**A**E**L**V**A**S**C**D**Y**E**T**G**T**E**W**E**G**V**G**F**L**Y**Q 448  
TRIAE\_CS42\_3AS\_TGAcv **YGA**L**P**ASS**Q**D**Q**-**F**SGVE**V**EL**K**RR**F**GV**S**NG**H**IAS**L**RR**S**GT**G**ST**I**V**A**Q**D**V**L**P**---**Q**D**A**E**L**V**A**S**C**D**Y**E**T**G**T**E**W**E**G**V**G**F**L**Y**Q 477  
TRIAE\_CS42\_3DS\_TGAcv **YGA**L**P**ASS**Q**D**H**QS**G**VE**V**EL**K**RR**F**GV**S**NG**H**IAS**L**RR**S**GT**G**ST**I**V**A**R**D**G**L**P**Q**P**Q**Q**D**A**E**L**V**A**S**C**D**Y**E**T**G**T**E**W**E**G**V**G**F**L**Y**Q 452

|                      |                  |             |                     |       |      |               |      |    |       |      |     |    |     |     |    |    |    |    |    |    |    |    |    |    |    |   |   |   |   |   |   |   |   |   |   |   |   |   |   |   |     |   |     |     |   |   |   |   |   |   |   |   |   |   |   |     |     |     |
|----------------------|------------------|-------------|---------------------|-------|------|---------------|------|----|-------|------|-----|----|-----|-----|----|----|----|----|----|----|----|----|----|----|----|---|---|---|---|---|---|---|---|---|---|---|---|---|---|---|-----|---|-----|-----|---|---|---|---|---|---|---|---|---|---|---|-----|-----|-----|
| TRIAE_CS42_3B_TGACv1 | SVVEDYFTGYRQLYCR | GWTSVYCFPAT | GSRPFFLGSVPTNLNDALV | QNKRM | MSGM | LAVGLSRHCPLAS | AAAT | SV | PSMGF | 527  |     |    |     |     |    |    |    |    |    |    |    |    |    |    |    |   |   |   |   |   |   |   |   |   |   |   |   |   |   |   |     |   |     |     |   |   |   |   |   |   |   |   |   |   |   |     |     |     |
| TRIAE_CS42_3DS_TGACv | SVVEDYFTGYRQLYCR | GWTSVYCFPAA | ASRPFPLGSVPTNLNDALV | QNKRM | MSGM | LAVGLSRHCPLAS | AAAT | CV | PSMGF | 527  |     |    |     |     |    |    |    |    |    |    |    |    |    |    |    |   |   |   |   |   |   |   |   |   |   |   |   |   |   |   |     |   |     |     |   |   |   |   |   |   |   |   |   |   |   |     |     |     |
| TRIAE_CS42_3AS_TGACv | SVVEDYFTGYRQLYCR | GWTSVYCFPAT | GSRPFFLGSVPTNLNDALV | QNKRM | MSGM | LAVGLSRHCPLAS | AAAT | SV | PSMGF | 557  |     |    |     |     |    |    |    |    |    |    |    |    |    |    |    |   |   |   |   |   |   |   |   |   |   |   |   |   |   |   |     |   |     |     |   |   |   |   |   |   |   |   |   |   |   |     |     |     |
| TRIAE_CS42_3DS_TGACv | SVVEDYFTGYRQLYCP | GWTSVYCFPAT | GTRPFFLGSVPTNLNDALV | QNKRM | MSGM | LAVGLSRHCPLAS | AAAT | SV | PSMGF | 532  |     |    |     |     |    |    |    |    |    |    |    |    |    |    |    |   |   |   |   |   |   |   |   |   |   |   |   |   |   |   |     |   |     |     |   |   |   |   |   |   |   |   |   |   |   |     |     |     |
| TRIAE_CS42_3B_TGACv1 | AYYAFM           | ALYAFV      | LCYAT               | V     | PQ   | LCF           | RG   | TS | SFF   | -EAS | TL  | WF | AAV | F   | SS | SL | QH | L  | VE | VS | V  | AK | R  | GL | A  | A | R | T | C | W | N | E | Q | R | F | W | A | L | N | A | V   | T | 606 |     |   |   |   |   |   |   |   |   |   |   |   |     |     |     |
| TRIAE_CS42_3DS_TGACv | AYYAFM           | ALYAFV      | LCYAT               | V     | PQ   | LCF           | RG   | TS | SFF   | GAA  | SL  | WF | AAV | F   | SS | SL | QH | L  | VE | VS | V  | AK | R  | GL | A  | A | R | T | C | W | N | E | Q | R | F | W | A | L | N | A | V   | T | 607 |     |   |   |   |   |   |   |   |   |   |   |   |     |     |     |
| TRIAE_CS42_3AS_TGACv | AYYAFM           | ALYAFV      | LCYAT               | V     | PQ   | LCF           | RG   | TS | SFF   | EAA  | SL  | WF | AAV | F   | SS | SL | QH | L  | VE | VS | V  | AK | R  | GL | A  | A | R | T | C | W | N | E | Q | R | F | W | A | L | N | A | V   | T | 637 |     |   |   |   |   |   |   |   |   |   |   |   |     |     |     |
| TRIAE_CS42_3DS_TGACv | AYYAFM           | ALYAFV      | LCYAT               | V     | PQ   | LCF           | RG   | TS | SFF   | -GE  | SA  | L  | WF  | AAV | L  | SS | SL | QH | L  | VE | VS | V  | AK | R  | GL | A | A | R | T | C | W | N | E | Q | R | F | W | A | L | N | A   | V | T   | 611 |   |   |   |   |   |   |   |   |   |   |   |     |     |     |
| TRIAE_CS42_3B_TGACv1 | GOLFAC           | LS          | VALN                | LV    | DG   | AG            | GRAV | DF | DL    | TS   | KAS | D  | DR  | LY  | R  | G  | V  | F  | D  | F  | A  | G  | C  | S  | T  | L | L | L | P | A | T | T | L | C | L | L | N | A | A | L | V   | G | G   | V   | W | K | M | V | G | R | G | G | N | M | P | -   | 685 |     |
| TRIAE_CS42_3DS_TGACv | GOLFAC           | LS          | VALN                | LV    | G    | AG            | GRAV | DF | DL    | TS   | KAS | D  | DR  | LY  | R  | G  | V  | F  | D  | F  | A  | G  | C  | T  | L  | L | L | P | A | T | T | L | C | L | L | N | A | A | L | V | G   | G | V   | W   | K | M | V | G | R | G | G | S | V | S | - | 685 |     |     |
| TRIAE_CS42_3AS_TGACv | GOLFAC           | LS          | VALS                | LV    | G    | AG            | GRAV | DF | DL    | TS   | KAS | D  | DR  | LY  | R  | G  | V  | F  | D  | F  | A  | G  | C  | S  | A  | L | L | L | P | A | T | T | L | C | L | L | N | A | A | L | V   | G | G   | V   | W | K | M | V | G | R | G | G | N | V | S | G   | -   | 716 |
| TRIAE_CS42_3DS_TGACv | GOLFAC           | LS          | VALS                | LV    | G    | AG            | GRAV | DF | DL    | TS   | KAS | D  | DR  | LY  | R  | S  | V  | F  | D  | F  | A  | G  | C  | S  | A  | L | L | L | P | A | T | T | L | C | L | L | N | A | A | L | V   | G | G   | V   | W | K | M | V | G | R | G | G | S | V | S | -   | 689 |     |
| TRIAE_CS42_3B_TGACv1 | -GELF            | LL          | CY                  | AA    | LS   | Y             | P    | L  | L     | O    | G   | M  | F   | L   | R  | R  | D  | P  | A  | R  | V  | P  | A  | R  | I  | T | A | M | S | V | A | V | A | T | L | L | S | L | F | G | 734 |   |     |     |   |   |   |   |   |   |   |   |   |   |   |     |     |     |
| TRIAE_CS42_3DS_TGACv | -GELF            | LL          | CY                  | AA    | LS   | Y             | P    | L  | L     | O    | G   | M  | F   | L   | R  | R  | D  | P  | A  | R  | V  | P  | A  | P  | I  | T | A | M | S | V | A | V | A | T | L | L | S | L | F | G | 734 |   |     |     |   |   |   |   |   |   |   |   |   |   |   |     |     |     |
| TRIAE_CS42_3AS_TGACv | TGELF            | LL          | CY                  | AA    | LS   | Y             | P    | L  | L     | O    | G   | M  | F   | L   | R  | R  | D  | P  | A  | R  | V  | P  | A  | R  | I  | T | A | M | S | V | A | V | A | T | L | L | S | L | F | G | 766 |   |     |     |   |   |   |   |   |   |   |   |   |   |   |     |     |     |
| TRIAE_CS42_3DS_TGACv | -GELF            | LL          | CY                  | AA    | LS   | Y             | P    | L  | L     | O    | G   | M  | F   | L   | R  | R  | D  | P  | A  | R  | V  | P  | A  | W  | I  | T | A | M | S | V | A | V | A | T | L | L | S | L | F | G | 738 |   |     |     |   |   |   |   |   |   |   |   |   |   |   |     |     |     |
